# Supplementary material for: Phosphorylation-Driven Epichaperome Assembly: A Critical Regulator of Cellular Adaptability and Proliferation
Source: Research Square preprint supplement (doi:10.21203/rs.3.rs-4114038/v1), 2024-04-03
Supplement: Supplementary file 2 [file 6a276b2e0d774fa57f09c849.xlsx]

## Sheet: Normalized SILAC ratio
Normalized median intensity SILAC ratio of mCherry-Hsp90 EE or AA mutant pull-down
	SILAC replicate 1: O22022105,6,7,8,9,10,11,12,O22022202,03
	SILAC replicate 2: O22021804,5,6,7,O22022003,4,5,6,8,O22022103
	SILAC replicate 3: O22022208,9,O22022303,4,5,6,7,8,O22022402,3
			SILAC_1	SILAC_2	SILAC_3
Rank	Uniq Pep	Acc #	H/L ratio	H/L ratio	H/L ratio	Protein MW	Species	Protein Name				Label	Mutant
[1]		1	1	1	1	110179	UNREADABLE	AA_mCherry_Hsp90				Heavy	EE
[1-1]	0	2	1	1	1	110295	UNREADABLE	EE_mCherry_Hsp90				Light	AA
[1-2]	0	P11499	0.985477	1.0095	0.970874	83281.9	MOUSE	Heat shock protein HSP 90-beta
[1-3]	116	P07901	1.01931	0.991832	1	84788.6	MOUSE	Heat shock protein HSP 90-alpha
[2]		Q60864	0.931373	0.923913	0.892857	62582.7	MOUSE	Stress-induced-phosphoprotein 1
[3]		P63017	0.826087	0.85	0.833333	70871.6	MOUSE	Heat shock cognate 71 kDa protein
[3-2]	27	P20029	0.896226	0.809524	0.869565	72422.6	MOUSE	Endoplasmic reticulum chaperone BiP
[3-3]	11	P17879	0.791667	0.752212	0.826446	70176.8	MOUSE	Heat shock 70 kDa protein 1B
[3-4]	11	Q61696	0.791667	0.752212	0.826446	70079.7	MOUSE	Heat shock 70 kDa protein 1A
[4]		P99024	0.940594	0.794393	0.833333	49671.3	MOUSE	Tubulin beta-5 chain
[4-1]	20	P68372	0.966429	0.825243	0.847458	49831.5	MOUSE	Tubulin beta-4B chain
[4-2]	24	Q9CWF2	0.961538	0.825243	0.854701	49953.5	MOUSE	Tubulin beta-2B chain
[4-3]	22	Q7TMM9	0.963489	0.825243	0.854701	49907.4	MOUSE	Tubulin beta-2A chain
[4-4]	38	Q922F4	0.969388	0.841584	0.862069	50090.8	MOUSE	Tubulin beta-6 chain
[4-5]	16	Q9ERD7	0.940594	0.801887	0.833333	50419.1	MOUSE	Tubulin beta-3 chain
[4-6]	9	Q9D6F9	0.955734	0.817308	0.840336	49586.2	MOUSE	Tubulin beta-4A chain
[5]		Q9DCL9	0.785124	0.809524	0.719424	47006.5	MOUSE	Multifunctional protein ADE2
[6]		Q9QXS1	1.10723	1.17403	1.0846	534192	MOUSE	Plectin
[7]		P68369	1.17284	0.932018	0.869565	50136.1	MOUSE	Tubulin alpha-1A chain
[7-1]	6	P05213	1.16279	0.930997	0.862069	50152.1	MOUSE	Tubulin alpha-1B chain
[7-2]	6	P68373	1.15572	0.930997	0.862069	49909.8	MOUSE	Tubulin alpha-1C chain
[7-3]	13	P68368	1.19048	0.957207	0.869565	49924.9	MOUSE	Tubulin alpha-4A chain
[8]		P80314	1.17574	1.11989	0.892857	57477.7	MOUSE	T-complex protein 1 subunit beta
[9]		P10126	1.37085	1.10533	1.2285	50114.3	MOUSE	Elongation factor 1-alpha 1
[10]		P62908	1.35908	1.28205	1.24378	26674.5	MOUSE	40S ribosomal protein S3
[11]		P62702	1.02814	0.974771	0.909091	29598	MOUSE	40S ribosomal protein S4, X isoform
[12]		P09405	1.05909	0.988372	0.917431	76723.7	MOUSE	Nucleolin
[13]		P16858	1.8664	1.63148	1.62338	35810.3	MOUSE	Glyceraldehyde-3-phosphate dehydrogenase
[14]		P80315	1.22898	1.07868	1.05708	58066.9	MOUSE	T-complex protein 1 subunit delta
[14-1]	36	P80316	1.15431	1.15489	0.980392	59624.6	MOUSE	T-complex protein 1 subunit epsilon
[15]		P30416	1.57025	1.28012	1.65563	51572.8	MOUSE	Peptidyl-prolyl cis-trans isomerase FKBP4
[16]		P27659	0.896226	0.964813	0.757576	46110.3	MOUSE	60S ribosomal protein L3
[17]		Q9ESZ8	0.88785	0.85	0.819672	112266	MOUSE	General transcription factor II-I
[18]		Q61081	1.16708	1.09819	1.1534	44593.8	MOUSE	Hsp90 co-chaperone Cdc37
[19]		O08810	0.940594	0.87269	0.869565	109362	MOUSE	116 kDa U5 small nuclear ribonucleoprotein component
[19-1]	35	P58252	1.00211	0.887265	1.06383	95314.9	MOUSE	Elongation factor 2
[20]		P63260	2.13964	2.02381	2.12766	41793.2	MOUSE	Actin, cytoplasmic 2
[20-2]	4	P68033	2.11581	2.00946	2.14133	42019.4	MOUSE	Actin, alpha cardiac muscle 1
[20-3]	4	P68134	2.11581	2.00946	2.14133	42051.4	MOUSE	Actin, alpha skeletal muscle
[20-4]	4	P62737	2.12054	2.00946	2.1322	42009.4	MOUSE	Actin, aortic smooth muscle
[20-5]	4	P63268	2.12054	2.00946	2.1322	41877.3	MOUSE	Actin, gamma-enteric smooth muscle
[20-7]	3	P61164	1.53971	1.24269	1.43678	42614.1	MOUSE	Alpha-centractin
[21]		Q9D8E6	1.07832	1.05198	0.806452	47154.1	MOUSE	60S ribosomal protein L4
[22]		Q61937	1.06862	0.995316	1.04603	32560.3	MOUSE	Nucleophosmin
[23]		Q9CYG7	1.3324	1.13485	1.23916	34278.3	MOUSE	Mitochondrial import receptor subunit TOM34
[24]		Q9WTM5	0.87156	0.882658	0.813008	51113	MOUSE	RuvB-like 2
[25]		P52480	0.940594	0.899471	1.17371	57845.4	MOUSE	Pyruvate kinase PKM
[25-1]	2	P53657	1.02814	0.395349	1.14025	62309.2	MOUSE	Pyruvate kinase PKLR
[26]		Q9CY58	0.98242	0.914962	0.934579	44714.5	MOUSE	Plasminogen activator inhibitor 1 RNA-binding protein
[27]		P42932	1.12693	1.05328	0.961538	59556	MOUSE	T-complex protein 1 subunit theta
[28]		Q7TPV4	1.47745	1.50709	1.11607	152038	MOUSE	Myb-binding protein 1A
[29]		Q922B2	0.863636	0.825243	0.793651	57147.7	MOUSE	Aspartate--tRNA ligase, cytoplasmic
[30]		Q62318	1	0.97032	0.943396	88847.9	MOUSE	Transcription intermediary factor 1-beta
[31]		Q9D8N0	1.1432	1.06784	1.00806	50061.2	MOUSE	Elongation factor 1-gamma
[32]		P29341	1.11502	0.876289	0.854701	70671.5	MOUSE	Polyadenylate-binding protein 1
[33]		P14869	0.977366	0.948661	0.900901	34216.7	MOUSE	60S acidic ribosomal protein P0
[34]		P47962	0.88785	0.933041	0.8	34401	MOUSE	60S ribosomal protein L5
[35]		P60122	0.88785	0.855131	0.787402	50214.4	MOUSE	RuvB-like 1
[36]		P62830	0.962513	0.825243	0.75188	14865.6	MOUSE	60S ribosomal protein L23
[37]		P50580	1.17574	1.00236	1.04275	43699.2	MOUSE	Proliferation-associated protein 2G4
[38]		P62821	1.11633	0.833333	0.666667	22678	MOUSE	Ras-related protein Rab-1A
[38-1]	7	Q9D1G1	1.14458	0.809524	0.666667	22187.3	MOUSE	Ras-related protein Rab-1B
[38-2]	9	P55258	1.20712	1.03281	0.689655	23668.4	MOUSE	Ras-related protein Rab-8A
[38-3]	10	P61027	1.25995	0.97589	0.571429	22541.1	MOUSE	Ras-related protein Rab-10
[38-4]	13	Q91V41	1.09827	0.801887	0.584795	23897.2	MOUSE	Ras-related protein Rab-14
[38-5]	3	P61028	1.20712	1.0107	0.689655	23603.3	MOUSE	Ras-related protein Rab-8B
[38-6]	8	P35279	1.45929	0.996483	0.653595	23590	MOUSE	Ras-related protein Rab-6A
[38-7]	4	P61294	1.42429	0.927948	0.653595	23461.9	MOUSE	Ras-related protein Rab-6B
[38-10]	4	Q9DD03	1.07466	0.977011	0.606061	22770.3	MOUSE	Ras-related protein Rab-13
[38-11]	2	P56371	1.25165	0.801887	0.666667	24408.9	MOUSE	Ras-related protein Rab-4A
[38-12]	1	Q91ZR1	1.25165	0.863821	0.689655	23629	MOUSE	Ras-related protein Rab-4B
[39]		Q9CX34	0.848214	0.860324	0.769231	38159.2	MOUSE	Protein SGT1 homolog
[40]		P12970	0.87963	0.855131	0.689655	29976.8	MOUSE	60S ribosomal protein L7a
[41]		P11983	1.28032	1.22302	1.05485	60449.2	MOUSE	T-complex protein 1 subunit alpha
[42]		Q922D8	1.60473	1.3535	1.42653	101200	MOUSE	C-1-tetrahydrofolate synthase, cytoplasmic
[43]		P97351	1.03825	0.995316	0.917431	29885.1	MOUSE	40S ribosomal protein S3a
[44]		Q64378	1.01171	1.0083	0.961538	50966.5	MOUSE	Peptidyl-prolyl cis-trans isomerase FKBP5
[45]		P17182	1.29076	1.15646	1.1274	47141.2	MOUSE	Alpha-enolase
[46]		P35700	1.23698	1.05985	1.17233	22176.7	MOUSE	Peroxiredoxin-1
[47]		P28658	1.39706	1.07188	0.900901	53707.4	MOUSE	Ataxin-10
[48]		P80317	1.16279	1.07731	1.02041	58004.8	MOUSE	T-complex protein 1 subunit zeta
[49]		P60843	1.25	1.08418	0.892857	46154.4	MOUSE	Eukaryotic initiation factor 4A-I
[49-2]	6	Q91VC3	1.22581	1.00711	0.934579	46840.4	MOUSE	Eukaryotic initiation factor 4A-III
[50]		P80318	1.13909	1.09961	0.980392	60630.6	MOUSE	T-complex protein 1 subunit gamma
[51]		Q99L47	1.04053	0.862944	1.05042	41656.3	MOUSE	Hsc70-interacting protein
[52]		Q61656	1.05673	1.07868	0.980392	69290.8	MOUSE	Probable ATP-dependent RNA helicase DDX5
[52-1]	23	Q62167	1.28552	1.08557	1	73102	MOUSE	ATP-dependent RNA helicase DDX3X
[52-2]	21	P16381	1.28901	1.08557	1	73141.2	MOUSE	Putative ATP-dependent RNA helicase Pl10
[52-3]	20	Q62095	1.30316	1.07595	1	73428.5	MOUSE	ATP-dependent RNA helicase DDX3Y
[53]		Q6ZQ08	1.59933	1.02286	0.892857	266810	MOUSE	CCR4-NOT transcription complex subunit 1
[54]		Q8CGC7	0.730769	0.794393	0.806452	170081	MOUSE	Bifunctional glutamate/proline--tRNA ligase
[55]		Q9Z0N1	1.00956	0.977011	0.909091	51065.9	MOUSE	Eukaryotic translation initiation factor 2 subunit 3, X-linked
[56]		P47911	0.904762	0.893796	0.724638	33509.9	MOUSE	60S ribosomal protein L6
[57]		P63037	1.10723	1.0665	1.05597	44868.6	MOUSE	DnaJ homolog subfamily A member 1
[58]		P62270	1.68739	1.54827	1.47929	17718.8	MOUSE	40S ribosomal protein S18
[59]		Q6ZWV3	0.966429	0.90715	0.787402	24604.1	MOUSE	60S ribosomal protein L10
[60]		Q9Z1R2	0.904762	0.664062	1.36612	121038	MOUSE	Large proline-rich protein BAG6
[62]		Q9JKY0	1.53722	1.14247	1.001	33601.5	MOUSE	CCR4-NOT transcription complex subunit 9
[63]		Q8VEK3	1.06502	1.04551	1	87918.4	MOUSE	Heterogeneous nuclear ribonucleoprotein U
[64]		P62751	0.996852	0.893796	0.813008	17695.2	MOUSE	60S ribosomal protein L23a
[65]		Q9CZX8	1.14458	1.03912	1.03093	16085.6	MOUSE	40S ribosomal protein S19
[66]		Q9QYI3	1.23859	1.03281	1.19904	56476.3	MOUSE	DnaJ homolog subfamily C member 7
[67]		P97461	1.37283	1.25554	1.18343	22889.6	MOUSE	40S ribosomal protein S5
[68]		P53026	0.95	0.903294	0.884956	24916.6	MOUSE	60S ribosomal protein L10a
[69]		P14148	1.12559	1.02657	0.813008	31419.9	MOUSE	60S ribosomal protein L7
[70]		P62889	0.958628	0.912997	0.884956	12784.2	MOUSE	60S ribosomal protein L30
[71]		P80313	1.20558	1.18056	1.00806	59652.7	MOUSE	T-complex protein 1 subunit eta
[72]		P62281	1.03486	0.926936	0.961538	18430.9	MOUSE	40S ribosomal protein S11
[73]		P49312	1.12028	1.04167	1	34196.5	MOUSE	Heterogeneous nuclear ribonucleoprotein A1
[73-1]	18	O88569	1.32497	1.04167	1.0395	37403	MOUSE	Heterogeneous nuclear ribonucleoproteins A2/B1
[73-2]	9	Q8BG05	1.20865	0.936123	1.00402	39652.3	MOUSE	Heterogeneous nuclear ribonucleoprotein A3
[73-3]	6	Q9CX86	1.19197	0.89568	1.0917	30530.6	MOUSE	Heterogeneous nuclear ribonucleoprotein A0
[74]		P70168	1.0882	0.904255	0.877193	97185	MOUSE	Importin subunit beta-1
[75]		P61222	1.33427	1.17892	1.14548	67315	MOUSE	ATP-binding cassette sub-family E member 1
[76]		P97855	1.06982	0.909091	0.8	51829.2	MOUSE	Ras GTPase-activating protein-binding protein 1
[76-1]	13	P97379	1.09954	1	0.8	54088.5	MOUSE	Ras GTPase-activating protein-binding protein 2
[77]		P36552	0.516304	0.502959	0.515464	49715	MOUSE	Oxygen-dependent coproporphyrinogen-III oxidase, mitochondrial
[78]		O88477	0.993724	0.825243	0.793651	63451.1	MOUSE	Insulin-like growth factor 2 mRNA-binding protein 1
[78-1]	2	Q9CPN8	1.05909	0.952915	0.819672	63575.4	MOUSE	Insulin-like growth factor 2 mRNA-binding protein 3
[79]		P14131	1.28901	1.1612	1.07759	16445.5	MOUSE	40S ribosomal protein S16
[80]		P57776	1.18454	1.08974	1.04275	31293.3	MOUSE	Elongation factor 1-delta
[81]		Q6Y7W8	0.913462	0.787037	0.689655	149194	MOUSE	GRB10-interacting GYF protein 2
[82]		Q8BWY9	2.28916	1.52057	0.381679	102044	MOUSE	Protein CIP2A
[83]		P62301	1.03149	0.90812	0.952381	17222.4	MOUSE	40S ribosomal protein S13
[84]		Q6PDM2	1.28032	1.1855	1.18343	27744.8	MOUSE	Serine/arginine-rich splicing factor 1
[85]		P63325	1.18012	1.02163	1.03734	18915.9	MOUSE	40S ribosomal protein S10
[86]		P47963	1.10852	1.04938	0.826446	24305.7	MOUSE	60S ribosomal protein L13
[87]		P35979	0.95	0.899471	0.900901	17804.7	MOUSE	60S ribosomal protein L12
[88]		O09167	0.986501	0.833333	0.769231	18562	MOUSE	60S ribosomal protein L21
[89]		P68040	1.14046	1.15646	1.2987	35077	MOUSE	Receptor of activated protein C kinase 1
[90]		P62245	0.940594	0.877193	0.884956	14839.6	MOUSE	40S ribosomal protein S15a
[91]		P62264	1.10852	0.984936	0.900901	16272.9	MOUSE	40S ribosomal protein S14
[92]		P51150	1.18454	1.01311	0.671141	23490	MOUSE	Ras-related protein Rab-7a
[93]		Q9CXW4	0.940594	0.901379	0.892857	20252.6	MOUSE	60S ribosomal protein L11
[94]		Q03265	1.6696	1.25926	1.36612	59753.1	MOUSE	ATP synthase subunit alpha, mitochondrial
[95]		Q9D0E1	1.10465	1.12882	1.10988	77649.5	MOUSE	Heterogeneous nuclear ribonucleoprotein M
[96]		Q6ZWN5	1.1323	1.01796	0.840336	22591.6	MOUSE	40S ribosomal protein S9
[97]		P21126	0.88785	0.643939	1.44509	17800.7	MOUSE	Ubiquitin-like protein 4A
[98]		P11087	0.0194672	0.0379464	-	138034	MOUSE	Collagen alpha-1(I) chain
[98-1]	3	P28481	0.0140118	0.0222513	-	141975	MOUSE	Collagen alpha-1(II) chain
[99]		P14206	0.5	0.598592	0.492611	32838.4	MOUSE	40S ribosomal protein SA
[99-1]	8	G5E870	-	1.07731	0.917431	224130	MOUSE	E3 ubiquitin-protein ligase TRIP12
[100]		P54823	0.987526	0.779817	0.787402	54192.1	MOUSE	Probable ATP-dependent RNA helicase DDX6
[101]		Q8CG48	-	0.97254	0.819672	134240	MOUSE	Structural maintenance of chromosomes protein 2
[102]		Q68FD5	0.973361	0.978136	0.869565	191558	MOUSE	Clathrin heavy chain 1
[103]		Q6ZWX6	0.931373	0.964813	0.884956	36108.5	MOUSE	Eukaryotic translation initiation factor 2 subunit 1
[104]		E9PVA8	1.76252	1.27436	0.877193	293023	MOUSE	eIF-2-alpha kinase activator GCN1
[105]		P60335	1.60745	1.22478	0.581395	37498.2	MOUSE	Poly(rC)-binding protein 1
[105-1]	10	Q61990	1.55738	1.23188	0.60241	38222	MOUSE	Poly(rC)-binding protein 2
[105-2]	3	P57722	1.55738	1.23547	0.595238	39294.5	MOUSE	Poly(rC)-binding protein 3
[105-3]	5	P61979	1.54976	1.00473	1	50976.7	MOUSE	Heterogeneous nuclear ribonucleoprotein K
[105-4]	4	P62334	0.998948	1.14094	0.847458	44173.4	MOUSE	26S proteasome regulatory subunit 10B
[106]		Q587J6	1.40533	1.02781	0.925926	88189.8	MOUSE	LINE-1 type transposase domain-containing protein 1
[107]		Q99020	1.05088	1.09536	0.990099	30831.5	MOUSE	Heterogeneous nuclear ribonucleoprotein A/B
[107-1]	7	Q60668	1.15291	1.12285	0.961538	38354.4	MOUSE	Heterogeneous nuclear ribonucleoprotein D0
[107-2]	2	Q9Z130	1.12827	1.13788	0.961538	33559.1	MOUSE	Heterogeneous nuclear ribonucleoprotein D-like
[108]		Q6P5F9	1.98745	1.15332	0.724638	123094	MOUSE	Exportin-1
[109]		O70251	1.16422	1.14401	1.0917	24693.9	MOUSE	Elongation factor 1-beta
[110]		O35737	1.28205	0.992991	1.01112	49199.9	MOUSE	Heterogeneous nuclear ribonucleoprotein H
[110-1]	11	Q9Z2X1	1.19197	1.02533	1.002	45730.3	MOUSE	Heterogeneous nuclear ribonucleoprotein F
[111]		P35278	1.09195	1.02163	0.598802	23412.7	MOUSE	Ras-related protein Rab-5C
[111-1]	13	Q9CQD1	1.14458	1.04551	0.574713	23598.8	MOUSE	Ras-related protein Rab-5A
[111-2]	2	P61021	1.05088	1.0559	0.636943	23707	MOUSE	Ras-related protein Rab-5B
[112]		Q64525	1.00636	0.625	0.502513	13920.3	MOUSE	Histone H2B type 2-B
[113]		Q9WUD1	1.03037	1.04167	0.990099	34909.6	MOUSE	E3 ubiquitin-protein ligase CHIP
[114]		Q8K2F8	0.791667	0.809524	0.714286	50546.4	MOUSE	Protein LSM14 homolog A
[115]		Q68FL6	0.805085	0.90812	0.769231	101432	MOUSE	Methionine--tRNA ligase, cytoplasmic
[116]		P17225	1.22108	0.979263	0.925926	56478.6	MOUSE	Polypyrimidine tract-binding protein 1
[117]		Q4VBE8	1.59933	1.29969	0.769231	47211.8	MOUSE	WD repeat-containing protein 18
[118]		P61358	1.04972	0.998825	0.961538	15797.9	MOUSE	60S ribosomal protein L27
[119]		P60229	1.17284	1.19048	0.961538	52221.3	MOUSE	Eukaryotic translation initiation factor 3 subunit E
[120]		P61255	0.95	0.860324	0.806452	17258.4	MOUSE	60S ribosomal protein L26
[121]		O54946	1.09447	1.09395	0.934579	39807.6	MOUSE	DnaJ homolog subfamily B member 6
[122]		P17742	1.03373	1.13485	1.37363	17971.5	MOUSE	Peptidyl-prolyl cis-trans isomerase A
[122-1]	9	Q9CR16	1.58333	1.39344	1.75439	40742.9	MOUSE	Peptidyl-prolyl cis-trans isomerase D
[122-2]	6	P24369	-	1.2574	1.5873	23713.7	MOUSE	Peptidyl-prolyl cis-trans isomerase B
[122-3]	2	Q9D868	0.993724	1.01311	1.10742	20463.9	MOUSE	Peptidyl-prolyl cis-trans isomerase H
[123]		P14602	1.23859	1.05198	1.21951	23014	MOUSE	Heat shock protein beta-1
[124]		P63101	0.896226	0.825243	0.925926	27771.4	MOUSE	14-3-3 protein zeta/delta
[124-1]	8	P68254	0.896226	0.883576	0.943396	27778.5	MOUSE	14-3-3 protein theta
[124-2]	11	P62259	0.940594	0.893796	0.925926	29174.2	MOUSE	14-3-3 protein epsilon
[124-3]	7	P61982	0.913462	0.916936	0.925926	28302.8	MOUSE	14-3-3 protein gamma
[124-4]	3	P68510	0.896226	0.910064	0.925926	28212	MOUSE	14-3-3 protein eta
[124-5]	2	Q9CQV8	0.896226	0.910064	0.925926	28086.7	MOUSE	14-3-3 protein beta/alpha
[124-6]	2	O70456	0.896226	0.910064	0.925926	27706.3	MOUSE	14-3-3 protein sigma
[125]		P15105	0.590062	0.691057	0.628931	42120.1	MOUSE	Glutamine synthetase
[126]		Q64727	0.992685	0.456989	1.1325	116718	MOUSE	Vinculin
[127]		O35685	0.963489	1.04294	0.970874	38358.3	MOUSE	Nuclear migration protein nudC
[128]		P62717	0.87156	0.892857	0.819672	20732.5	MOUSE	60S ribosomal protein L18a
[129]		P62918	0.965447	0.883576	0.840336	28024.9	MOUSE	60S ribosomal protein L8
[130]		Q9CR57	0.931373	0.85	0.746269	23564.3	MOUSE	60S ribosomal protein L14
[131]		Q91V92	1.31397	1.10104	1.00604	119729	MOUSE	ATP-citrate synthase
[132]		P62849	0.967413	0.833333	0.78125	15423.3	MOUSE	40S ribosomal protein S24
[134]		Q8BP67	0.987526	0.874486	0.806452	17779.1	MOUSE	60S ribosomal protein L24
[135]		Q9QYJ0	1.06264	1.13485	1.07411	45746	MOUSE	DnaJ homolog subfamily A member 2
[136]		P52293	1.35521	1.01311	0.952381	57928.6	MOUSE	Importin subunit alpha-1
[137]		Q6P4T2	0.748031	0.935094	0.854701	244549	MOUSE	U5 small nuclear ribonucleoprotein 200 kDa helicase
[138]		Q60676	1.30137	1.14865	1.19048	56877.2	MOUSE	Serine/threonine-protein phosphatase 5
[139]		P62242	0.987526	0.825243	0.884956	24205.4	MOUSE	40S ribosomal protein S8
[140]		Q9DCH4	1.13772	1.12137	0.990099	37984.6	MOUSE	Eukaryotic translation initiation factor 3 subunit F
[141]		P23116	1.01387	0.92091	0.980392	161938	MOUSE	Eukaryotic translation initiation factor 3 subunit A
[142]		Q9CXW3	1.51757	1.30368	1.36799	26510.4	MOUSE	Calcyclin-binding protein
[143]		Q8BG32	0.990615	0.963719	0.869565	47437.2	MOUSE	26S proteasome non-ATPase regulatory subunit 11
[144]		P84089	1.27175	1.263	1.30378	12259.1	MOUSE	Enhancer of rudimentary homolog
[145]		Q9WUM4	2.66854	2.39437	2.25225	53121.4	MOUSE	Coronin-1C
[146]		P19253	1.03149	0.944444	0.729927	23464.4	MOUSE	60S ribosomal protein L13a
[147]		Q8BML9	0.904762	0.899471	0.819672	87677.3	MOUSE	Glutamine--tRNA ligase
[148]		Q9CPR4	0.993724	0.953984	0.847458	21423.3	MOUSE	60S ribosomal protein L17
[149]		P41105	1.05909	0.958286	0.793651	15733.6	MOUSE	60S ribosomal protein L28
[150]		Q61316	0.76	0.758929	0.775194	94133.4	MOUSE	Heat shock 70 kDa protein 4
[151]		P62960	1.12028	0.897571	0.819672	35730.2	MOUSE	Y-box-binding protein 1
[151-1]	2	Q9JKB3	1.10852	0.978136	0.819672	38813.9	MOUSE	Y-box-binding protein 3
[152]		Q3URQ0	3.45455	1.88053	0.892857	105210	MOUSE	Testis-expressed protein 10
[153]		B2RQC6	1.00742	0.85	0.862069	243241	MOUSE	CAD protein
[154]		Q99PV0	0.855856	1.00354	0.862069	273619	MOUSE	Pre-mRNA-processing-splicing factor 8
[155]		P57784	0.87156	0.809524	0.833333	28357.7	MOUSE	U2 small nuclear ribonucleoprotein A'
[156]		P63276	1.04167	0.946548	1.03413	15524.2	MOUSE	40S ribosomal protein S17
[157]		P25444	1.4095	1.19718	0.952381	31231.6	MOUSE	40S ribosomal protein S2
[158]		Q9DBG3	2.01699	1.02906	1.15875	104584	MOUSE	AP-2 complex subunit beta
[159]		P84099	1.20558	0.995316	0.8	23466.2	MOUSE	60S ribosomal protein L19
[160]		P62806	0.959596	0.559211	0.492611	11367.4	MOUSE	Histone H4
[161]		Q569Z6	1.11372	1.09819	1.29032	108179	MOUSE	Thyroid hormone receptor-associated protein 3
[162]		P51881	1.38081	-	1.0582	32931.6	MOUSE	ADP/ATP translocase 2
[163]		Q9D0I9	0.904762	0.870902	0.724638	75674.2	MOUSE	Arginine--tRNA ligase, cytoplasmic
[164]		Q62261	1.16564	1.2301	1.07411	274225	MOUSE	Spectrin beta chain, non-erythrocytic 1
[165]		Q9DBG5	0.730769	0.708333	0.925926	47262.6	MOUSE	Perilipin-3
[166]		P32233	1.00423	0.971429	0.952381	40512.5	MOUSE	Developmentally-regulated GTP-binding protein 1
[167]		Q8VIJ6	1.91147	1.27628	1.21359	75442.3	MOUSE	Splicing factor, proline- and glutamine-rich
[167-1]	5	Q99K48	1.9	1.20567	1.13766	54541.4	MOUSE	Non-POU domain-containing octamer-binding protein
[168]		P62082	0.966429	0.924918	0.892857	22127	MOUSE	40S ribosomal protein S7
[169]		P62983	1.42216	1.20226	1.17647	17951.1	MOUSE	Ubiquitin-40S ribosomal protein S27a
[170]		Q6ZWU9	0.969388	0.841584	0.724638	9461.2	MOUSE	40S ribosomal protein S27
[170-1]	4	Q6ZWY3	0.992685	0.817308	0.740741	9477.3	MOUSE	40S ribosomal protein S27-like
[171]		Q9JHU4	1.30316	1.07595	0.917431	532050	MOUSE	Cytoplasmic dynein 1 heavy chain 1
[172]		O55142	1.0451	0.932018	0.925926	12553.8	MOUSE	60S ribosomal protein L35a
[173]		P61514	0.956697	0.875386	0.806452	10275.4	MOUSE	60S ribosomal protein L37a
[174]		Q9R061	1.16708	0.877193	0.78125	29518.2	MOUSE	Cytosolic Fe-S cluster assembly factor NUBP2
[175]		P62900	0.931373	0.862069	0.854701	14463	MOUSE	60S ribosomal protein L31
[176]		P63323	0.826087	0.89568	0.714286	14525.1	MOUSE	40S ribosomal protein S12
[177]		Q8BMJ2	0.725191	0.691057	0.740741	134194	MOUSE	Leucine--tRNA ligase, cytoplasmic
[178]		Q3UMC0	1.01171	0.97032	0.826446	97256.6	MOUSE	ATPase family protein 2 homolog
[178-1]	3	Q01853	1.48206	0.961538	0.909091	89322.6	MOUSE	Transitional endoplasmic reticulum ATPase
[179]		P51410	0.957661	0.916936	0.826446	21881.6	MOUSE	60S ribosomal protein L9
[180]		Q8BKC5	1.40325	1.13032	1.10988	123592	MOUSE	Importin-5
[181]		P60867	1.15713	1.07459	1.10254	13372.8	MOUSE	40S ribosomal protein S20
[182]		P99027	0.896226	0.904255	0.909091	11651	MOUSE	60S acidic ribosomal protein P2
[183]		P67984	0.92233	1.00592	0.884956	14759.1	MOUSE	60S ribosomal protein L22
[183-1]	6	Q9D7S7	0.953815	1.0107	0.909091	14467.5	MOUSE	60S ribosomal protein L22-like 1
[184]		P62267	1.0771	0.980392	0.869565	15807.7	MOUSE	40S ribosomal protein S23
[185]		O08583	0.855856	0.995316	0.877193	26940.2	MOUSE	THO complex subunit 4
[186]		P62843	1.12559	1.01675	1.02881	17040.3	MOUSE	40S ribosomal protein S15
[187]		E9Q557	0.0826087	0.300353	0.322581	332915	MOUSE	Desmoplakin
[188]		P06151	0.811966	0.833333	1.05932	36498.9	MOUSE	L-lactate dehydrogenase A chain
[189]		Q60972	1.15291	1.05328	1.07875	47656.1	MOUSE	Histone-binding protein RBBP4
[190]		P61290	1.46605	0.884495	0.581395	29506.3	MOUSE	Proteasome activator complex subunit 3
[191]		O09061	0.863636	0.915948	1	26372.4	MOUSE	Proteasome subunit beta type-1
[192]		Q62465	0.833333	0.889121	0.877193	43097	MOUSE	Synaptic vesicle membrane protein VAT-1 homolog
[193]		Q99P72	1.88492	1.82403	0.380228	126614	MOUSE	Reticulon-4
[194]		Q99MN1	0.855856	1.02041	0.833333	67840.3	MOUSE	Lysine--tRNA ligase
[195]		P62852	1.12161	0.841584	1.01215	13742.2	MOUSE	40S ribosomal protein S25
[196]		Q9CW03	-	1.09677	1.03093	141557	MOUSE	Structural maintenance of chromosomes protein 3
[197]		P24547	1.53226	1.09536	1.38889	55815.5	MOUSE	Inosine-5'-monophosphate dehydrogenase 2
[198]		Q9D7G0	1.19497	1.12882	1.08932	34834.6	MOUSE	Ribose-phosphate pyrophosphokinase 1
[198-1]	2	Q9CS42	1.11633	1.15176	1.05708	34786.4	MOUSE	Ribose-phosphate pyrophosphokinase 2
[199]		P30285	1.02371	1.08974	0.952381	33751.2	MOUSE	Cyclin-dependent kinase 4
[199-1]	8	Q99J95	1.12161	1.32193	1.05708	42762	MOUSE	Cyclin-dependent kinase 9
[199-2]	5	P11440	1.12293	1.06516	1.05708	34106.9	MOUSE	Cyclin-dependent kinase 1
[199-5]	2	Q69ZA1	1.09954	1.36656	0.990099	164554	MOUSE	Cyclin-dependent kinase 13
[200]		O54692	1.90381	1.2301	0.568182	88063.6	MOUSE	Centromere/kinetochore protein zw10 homolog
[201]		P70670	1.2786	1.19215	1.52439	220501	MOUSE	Nascent polypeptide-associated complex subunit alpha, muscle-specific form
[202]		Q6GQV7	-	1.32193	1	138836	MOUSE	Erythroid differentiation-related factor 1
[203]		Q9JJI8	1.02481	0.97254	0.934579	8203.9	MOUSE	60S ribosomal protein L38
[204]		Q9QYJ3	1.34371	1.23367	1.09769	38167.6	MOUSE	DnaJ homolog subfamily B member 1
[205]		P55821	0.748031	0.809524	0.78125	20828.2	MOUSE	Stathmin-2
[206]		Q921F2	1.4158	0.817308	0.970874	44548.1	MOUSE	TAR DNA-binding protein 43
[207]		P32067	0.826087	0.860324	0.840336	47756.9	MOUSE	Lupus La protein homolog
[208]		Q9D8W5	1.03486	1.01675	0.900901	52895.7	MOUSE	26S proteasome non-ATPase regulatory subunit 12
[209]		Q6ZQ38	1.55993	1.29969	0.769231	136333	MOUSE	Cullin-associated NEDD8-dissociated protein 1
[210]		P35980	1.07466	0.801887	0.653595	21644.7	MOUSE	60S ribosomal protein L18
[211]		P31230	0.811966	0.758929	0.78125	33997.6	MOUSE	Aminoacyl tRNA synthase complex-interacting multifunctional protein 1
[212]		Q9D1H7	0.983437	0.696721	1.49477	36525.6	MOUSE	Golgi to ER traffic protein 4 homolog
[212-1]	5	Q8C4J7	0.904762	0.758929	0.719424	88266.6	MOUSE	Transducin beta-like protein 3
[213]		O55234	0.833333	0.817308	0.819672	28532.7	MOUSE	Proteasome subunit beta type-5
[214]		Q8BFU2	1.11372	0.611511	0.520833	14121.6	MOUSE	Histone H2A type 3
[215]		P14115	0.896226	0.809524	0.769231	16605.6	MOUSE	60S ribosomal protein L27a
[216]		Q8K2Q0	1.27005	0.854271	0.78125	21850.3	MOUSE	COMM domain-containing protein 9
[217]		Q8QZY1	1.16137	1.08696	0.934579	66613.5	MOUSE	Eukaryotic translation initiation factor 3 subunit L
[218]		Q8K3Y3	1.07466	0.977011	0.714286	22720.2	MOUSE	Protein lin-28 homolog A
[219]		P05064	0.95	0.912997	1.09051	39356.3	MOUSE	Fructose-bisphosphate aldolase A
[220]		P46638	1.09447	0.992991	0.465116	24489.7	MOUSE	Ras-related protein Rab-11B
[221]		P62858	1.03599	1.08835	0.952381	7841.1	MOUSE	40S ribosomal protein S28
[222]		Q91YI0	1.08571	1.13032	1.64745	51739.6	MOUSE	Argininosuccinate lyase
[223]		Q9CQE8	0.972364	0.951848	0.892857	28152.4	MOUSE	RNA transcription, translation and transport factor protein
[224]		Q3U1J4	0.996852	0.85	1.02249	126854	MOUSE	DNA damage-binding protein 1
[225]		Q9EPU0	1.57546	-	0.735294	123968	MOUSE	Regulator of nonsense transcripts 1
[226]		P62317	1.10981	0.981524	0.952381	13527	MOUSE	Small nuclear ribonucleoprotein Sm D2
[227]		P62274	1.31215	1.23726	1.20919	6676.8	MOUSE	40S ribosomal protein S29
[228]		P62962	0.730769	0.862069	-	14957.4	MOUSE	Profilin-1
[229]		Q8C3I8	0.833333	0.794393	0.847458	42916.4	MOUSE	Protein HGH1 homolog
[230]		Q91VX2	-	1.0468	0.990099	117967	MOUSE	Ubiquitin-associated protein 2
[231]		A2AL36	0.818966	0.758929	0.657895	268882	MOUSE	Centriolin
[232]		P62855	0.896226	0.817308	0.769231	13015.5	MOUSE	40S ribosomal protein S26
[233]		Q60848	2.07424	1.32812	0.740741	95126.5	MOUSE	Lymphocyte-specific helicase
[234]		P27048	1.20406	1.26488	1.04058	23656.2	MOUSE	Small nuclear ribonucleoprotein-associated protein B
[235]		P15864	0.708955	0.456989	0.540541	21266.8	MOUSE	Histone H1.2
[235-2]	2	P43274	0.669014	-	0.581395	21977.5	MOUSE	Histone H1.4
[235-3]	3	P43275	0.725191	-	0.578035	21785.3	MOUSE	Histone H1.1
[236]		P53994	1.16137	1.08418	0.549451	23547.7	MOUSE	Ras-related protein Rab-2A
[237]		O70133	0.791667	1.16279	1.09649	149476	MOUSE	ATP-dependent RNA helicase A
[238]		Q9R0Q7	1.05556	1.04938	1.07527	18721.6	MOUSE	Prostaglandin E synthase 3
[239]		Q3UA06	2.08791	1.26866	0.444444	48377.1	MOUSE	Pachytene checkpoint protein 2 homolog
[240]		P62196	0.993724	1.04423	0.840336	45626.4	MOUSE	26S proteasome regulatory subunit 8
[240-1]	2	P62192	-	0.935094	0.141443	49184.9	MOUSE	26S proteasome regulatory subunit 4
[241]		P56959	1.16137	0.934066	0.862069	52673.5	MOUSE	RNA-binding protein FUS
[242]		Q60932	0.826087	0.752212	0.763359	32351.7	MOUSE	Voltage-dependent anion-selective channel protein 1
[243]		P16546	1.31397	1.21777	0.980392	284600	MOUSE	Spectrin alpha chain, non-erythrocytic 1
[244]		P47964	1.05438	0.949721	0.729927	12215.6	MOUSE	60S ribosomal protein L36
[245]		Q9QZD9	1.14734	1.18056	1	36461.1	MOUSE	Eukaryotic translation initiation factor 3 subunit I
[246]		P49718	1.15572	1.17566	1.22699	82407.5	MOUSE	DNA replication licensing factor MCM5
[247]		O35286	1.06862	1.02041	0.787402	91007.7	MOUSE	Pre-mRNA-splicing factor ATP-dependent RNA helicase DHX15
[248]		P62754	0.970378	0.841584	0.757576	28680.9	MOUSE	40S ribosomal protein S6
[249]		Q9QUM9	0.798319	0.817308	0.877193	27372.7	MOUSE	Proteasome subunit alpha type-6
[250]		Q8K019	-	1.26488	1.32626	106003	MOUSE	Bcl-2-associated transcription factor 1
[251]		Q6P9P6	1.12827	1.04809	0.877193	118028	MOUSE	Kinesin-like protein KIF11
[252]		Q9D8X5	1.62671	0.982659	0.833333	33574.6	MOUSE	CCR4-NOT transcription complex subunit 8
[253]		Q8BMB3	0.798319	0.833333	0.694444	28263.1	MOUSE	Eukaryotic translation initiation factor 4E type 2
[254]		Q9DBD5	2.3399	1.47826	0.943396	118070	MOUSE	Proline-, glutamic acid- and leucine-rich protein 1
[255]		Q8BX17	-	1.00473	0.763359	166594	MOUSE	Gem-associated protein 5
[256]		Q9CQW1	1.80952	1.36656	0.125628	22314.6	MOUSE	Synaptobrevin homolog YKT6
[257]		Q60865	1.097	0.905218	0.854701	78169.5	MOUSE	Caprin-1
[258]		Q9CQR2	0.545977	0.674603	0.653595	9141.4	MOUSE	40S ribosomal protein S21
[259]		Q99LG4	0.714286	-	0.719424	48795.7	MOUSE	Tetratricopeptide repeat protein 5
[260]		P84104	1.31761	1.08974	1.10742	19329.8	MOUSE	Serine/arginine-rich splicing factor 3
[260-1]	3	Q8BL97	2.15909	1.20739	1.20482	30817.8	MOUSE	Serine/arginine-rich splicing factor 7
[261]		P63073	0.848214	0.497076	0.735294	25053.4	MOUSE	Eukaryotic translation initiation factor 4E
[262]		Q99KD5	0.952859	0.977011	1.20337	103448	MOUSE	Protein unc-45 homolog A
[263]		Q6NZJ6	-	0.97032	0.961538	176078	MOUSE	Eukaryotic translation initiation factor 4 gamma 1
[264]		Q9DBZ5	1.19048	1.06383	0.854701	25086.9	MOUSE	Eukaryotic translation initiation factor 3 subunit K
[265]		Q9CQJ2	0.818966	0.833333	0.78125	32208.8	MOUSE	PIH1 domain-containing protein 1
[266]		Q99LF4	1.05205	-	0.840336	55249.8	MOUSE	RNA-splicing ligase RtcB homolog
[267]		Q9CXY6	1.19048	0.983796	0.78125	43062.5	MOUSE	Interleukin enhancer-binding factor 2
[268]		O70435	0.772358	0.857719	0.877193	28405.5	MOUSE	Proteasome subunit alpha type-3
[269]		Q9D1M4	0.76	0.794393	0.806452	19858.9	MOUSE	Eukaryotic translation elongation factor 1 epsilon-1
[270]		P46471	0.92233	1.18881	0.892857	48648.3	MOUSE	26S proteasome regulatory subunit 7
[271]		Q3THS6	1.31034	0.994152	0.952381	43689.1	MOUSE	S-adenosylmethionine synthase isoform type-2
[272]		Q9R1P3	0.995807	0.896624	1.0142	22906.6	MOUSE	Proteasome subunit beta type-2
[273]		Q8BU30	0.855856	0.841584	0.729927	144272	MOUSE	Isoleucine--tRNA ligase, cytoplasmic
[274]		Q8BK64	1.48437	1.33229	1.40845	38117.4	MOUSE	Activator of 90 kDa heat shock protein ATPase homolog 1
[275]		Q99KP6	1.03939	0.948661	0.961538	55239.3	MOUSE	Pre-mRNA-processing factor 19
[276]		P83882	0.994764	0.787037	0.769231	12440.9	MOUSE	60S ribosomal protein L36a
[277]		P63168	1.0907	0.939227	0.925926	10366	MOUSE	Dynein light chain 1, cytoplasmic
[278]		Q61066	1.10723	0.889121	0.925926	52576.8	MOUSE	Nuclear receptor subfamily 0 group B member 1
[279]		Q9D1R9	0.840708	0.888192	0.8	13293	MOUSE	60S ribosomal protein L34
[280]		Q921M3	1.14596	0.833333	0.862069	135552	MOUSE	Splicing factor 3B subunit 3
[281]		P70372	1.15291	0.983796	0.806452	36169.3	MOUSE	ELAV-like protein 1
[282]		Q60737	0.964467	0.859454	0.961538	45133.9	MOUSE	Casein kinase II subunit alpha
[283]		Q1PSW8	1.16564	1.0107	0.826446	92055.2	MOUSE	E3 ubiquitin-protein ligase TRIM71
[284]		Q9EQU5	0.811966	0.984936	1.67785	33378	MOUSE	Protein SET
[285]		Q91VM5	1.42216	1.26488	1.21212	42162	MOUSE	RNA binding motif protein, X-linked-like-1
[286]		Q8C1B7	1.12693	1.16758	0.990099	49695.1	MOUSE	Septin-11
[286-1]	2	O55131	1.01604	-	0.943396	50550.3	MOUSE	Septin-7
[287]		Q9Z2U0	1.06264	0.841584	0.862069	27855.1	MOUSE	Proteasome subunit alpha type-7
[288]		P52432	1.16708	0.967008	0.934579	39107	MOUSE	DNA-directed RNA polymerases I and III subunit RPAC1
[289]		Q60605	0.791667	0.850851	0.980392	16930.2	MOUSE	Myosin light polypeptide 6
[290]		Q9Z1Q9	1.39501	0.948661	0.909091	140217	MOUSE	Valine--tRNA ligase
[291]		Q9WTZ0	0.719697	0.779817	0.78125	18187.1	MOUSE	Protein UXT
[292]		Q6PB51	1.07103	0.745614	0.990099	30427.7	MOUSE	Coiled-coil domain-containing protein 117
[293]		Q8VDM4	0.840708	0.936123	0.952381	100204	MOUSE	26S proteasome non-ATPase regulatory subunit 2
[294]		Q80X50	1.05909	0.841584	0.990099	116800	MOUSE	Ubiquitin-associated protein 2-like
[295]		Q9R1P0	0.913462	0.787037	0.892857	29471	MOUSE	Proteasome subunit alpha type-4
[296]		Q60692	0.87963	1.04294	0.961538	25379	MOUSE	Proteasome subunit beta type-6
[297]		Q9R1P1	0.863636	0.879917	0.826446	22965.1	MOUSE	Proteasome subunit beta type-3
[298]		Q8BG94	0.863636	0.877193	0.833333	22652.4	MOUSE	COMM domain-containing protein 7
[299]		Q7TMK9	1.01171	0.890985	0.900901	69633.2	MOUSE	Heterogeneous nuclear ribonucleoprotein Q
[300]		O70591	0.826087	0.787037	0.714286	16533.8	MOUSE	Prefoldin subunit 2
[301]		Q8R1B4	1.12693	1.03912	1.0101	105532	MOUSE	Eukaryotic translation initiation factor 3 subunit C
[302]		O88685	0.87963	0.902335	0.877193	49549.4	MOUSE	26S proteasome regulatory subunit 6A
[303]		P62827	1.03712	1.21083	1.11111	24423.3	MOUSE	GTP-binding nuclear protein Ran
[304]		Q8JZY2	0.863636	0.85	0.8	22812.5	MOUSE	COMM domain-containing protein 10
[305]		P23249	1.51515	0.913978	0.847458	113584	MOUSE	Putative helicase MOV-10
[306]		Q9D706	0.88785	0.888192	0.840336	74096.2	MOUSE	RNA polymerase II-associated protein 3
[307]		Q9CRC8	1.68739	-	0.505051	68076.2	MOUSE	Leucine-rich repeat-containing protein 40
[308]		Q99JX4	0.940594	1.34921	0.900901	42517.4	MOUSE	Eukaryotic translation initiation factor 3 subunit M
[309]		O35326	1.13501	0.953984	0.943396	30891.6	MOUSE	Serine/arginine-rich splicing factor 5
[309-1]	5	Q3TWW8	1.13501	0.963719	0.934579	39025.6	MOUSE	Serine/arginine-rich splicing factor 6
[309-2]	2	Q8VE97	3.06452	0.953984	0.934579	55979.8	MOUSE	Serine/arginine-rich splicing factor 4
[310]		Q8R010	0.848214	0.856855	0.884956	35377.9	MOUSE	Aminoacyl tRNA synthase complex-interacting multifunctional protein 2
[311]		P26516	0.855856	-	0.847458	36540.1	MOUSE	26S proteasome non-ATPase regulatory subunit 7
[312]		Q9D6R2	1.92308	1.99531	0.826446	39639.1	MOUSE	Isocitrate dehydrogenase [NAD] subunit alpha, mitochondrial
[313]		Q8BGF3	0.785124	0.758929	0.735294	39790.8	MOUSE	Dynein axonemal assembly factor 10
[314]		P47915	0.95	0.801887	0.684932	17587.1	MOUSE	60S ribosomal protein L29
[315]		P63087	1.46832	0.957207	0.961538	36984.1	MOUSE	Serine/threonine-protein phosphatase PP1-gamma catalytic subunit
[315-1]	2	P62141	1.45929	-	0.952381	37187.2	MOUSE	Serine/threonine-protein phosphatase PP1-beta catalytic subunit
[315-2]	6	P62137	1.43722	-	0.862069	37540.4	MOUSE	Serine/threonine-protein phosphatase PP1-alpha catalytic subunit
[316]		Q8BW10	1.07103	0.464481	1.00301	45464.1	MOUSE	RNA-binding protein NOB1
[317]		Q9QZL0	1.58598	1.36656	0.892857	53323	MOUSE	Receptor-interacting serine/threonine-protein kinase 3
[318]		Q8BJW6	1.01822	0.965909	0.990099	64403.8	MOUSE	Eukaryotic translation initiation factor 2A
[319]		Q6ZWV7	1.05322	0.982659	0.729927	14552.7	MOUSE	60S ribosomal protein L35
[320]		P19096	-	1.14555	0.934579	272431	MOUSE	Fatty acid synthase
[321]		Q9Z204	1.48437	0.87001	0.909091	34385	MOUSE	Heterogeneous nuclear ribonucleoproteins C1/C2
[322]		P59999	1.01496	-	0.819672	19667.2	MOUSE	Actin-related protein 2/3 complex subunit 4
[323]		P08228	2.31144	3.15985	4.92611	15942.8	MOUSE	Superoxide dismutase [Cu-Zn]
[324]		Q02257	0.136888	-	0.111235	81801.5	MOUSE	Junction plakoglobin
[325]		Q01149	0.0230024	0.0156827	-	129558	MOUSE	Collagen alpha-2(I) chain
[326]		Q9WVJ2	0.863636	0.765766	0.961538	42809.8	MOUSE	26S proteasome non-ATPase regulatory subunit 13
[327]		Q9D0M1	1.13636	-	1.06838	39432.2	MOUSE	Phosphoribosyl pyrophosphate synthase-associated protein 1
[328]		Q8VDJ3	1.36691	1.29376	1.20627	141744	MOUSE	Vigilin
[329]		P54775	1.00742	1.01311	0.961538	47408.7	MOUSE	26S proteasome regulatory subunit 6B
[330]		Q01768	0.963489	1.12285	1.30378	17363.2	MOUSE	Nucleoside diphosphate kinase B
[330-1]	2	P15532	0.952859	1.15176	1.2837	17208	MOUSE	Nucleoside diphosphate kinase A
[331]		Q9JIF0	0.818966	0.897571	0.757576	42436	MOUSE	Protein arginine N-methyltransferase 1
[332]		Q63932	2.13964	1.95402	0.442478	44402.4	MOUSE	Dual specificity mitogen-activated protein kinase kinase 2
[333]		P10639	1.06145	0.984936	1.3947	11675.6	MOUSE	Thioredoxin
[334]		P59708	1.00849	0.967008	0.925926	14585	MOUSE	Splicing factor 3B subunit 6
[335]		Q7TQH0	-	0.841584	0.70922	110650	MOUSE	Ataxin-2-like protein
[336]		P04627	1.01496	0.801887	1.002	67582.1	MOUSE	Serine/threonine-protein kinase A-Raf
[337]		Q8R395	0.818966	0.859454	0.819672	24493.3	MOUSE	COMM domain-containing protein 5
[338]		P35761	1.19197	0.914962	0.909091	96211.7	MOUSE	Dual specificity protein kinase TTK
[339]		Q8BWQ6	0.92233	1.263	0.877193	109078	MOUSE	VPS35 endosomal protein-sorting factor-like
[340]		P25206	-	1.37763	1.1534	91547.1	MOUSE	DNA replication licensing factor MCM3
[341]		Q8K0V4	1.31944	0.772727	0.806452	81946.4	MOUSE	CCR4-NOT transcription complex subunit 3
[342]		Q99JI4	0.730769	0.674603	0.892857	45536.8	MOUSE	26S proteasome non-ATPase regulatory subunit 6
[343]		Q9JIG7	0.976362	0.85	0.724638	70844.1	MOUSE	Coiled-coil domain-containing protein 22
[344]		Q9Z2U1	0.996852	0.878099	0.653595	26411.3	MOUSE	Proteasome subunit alpha type-5
[345]		A2AF47	-	-	0.793651	237773	MOUSE	Dedicator of cytokinesis protein 11
[346]		Q03958	0.826087	0.825243	0.813008	14454.6	MOUSE	Prefoldin subunit 6
[347]		P83940	0.993724	0.73913	0.980392	12473.3	MOUSE	Elongin-C
[348]		P14576	0.904762	-	1.01523	55721.3	MOUSE	Signal recognition particle 54 kDa protein
[349]		Q91VR5	0.957661	0.512048	0.943396	82500.9	MOUSE	ATP-dependent RNA helicase DDX1
[350]		P47955	1.03825	0.85	0.943396	11475	MOUSE	60S acidic ribosomal protein P1
[351]		Q924C1	1.47287	1.11695	0.483092	136974	MOUSE	Exportin-5
[352]		Q810A3	1.09827	1.06918	1.03199	19997.8	MOUSE	Tetratricopeptide repeat protein 9C
[353]		Q9D0R8	0.325342	0.157993	0.75188	21700.9	MOUSE	Protein LSM12 homolog
[354]		Q80VD1	1.11633	0.961538	0.934579	45349.5	MOUSE	Protein FAM98B
[355]		Q9CQS7	1.42003	0.960452	0.478469	13810.3	MOUSE	Developmental pluripotency-associated protein 5A
[356]		Q9Z1D1	1.17574	1.21083	0.952381	35638.3	MOUSE	Eukaryotic translation initiation factor 3 subunit G
[357]		Q8K310	1.30854	1.21429	-	94631.1	MOUSE	Matrin-3
[358]		Q9JIK5	1.37283	1.36437	1.18343	93551.9	MOUSE	Nucleolar RNA helicase 2
[359]		Q9Z2N8	1.03486	0.732759	0.980392	47448.4	MOUSE	Actin-like protein 6A
[360]		P35550	1.15572	0.841584	0.884956	34307.1	MOUSE	rRNA 2'-O-methyltransferase fibrillarin
[361]		Q9WVA3	1.54221	1.01675	1.05485	36954.8	MOUSE	Mitotic checkpoint protein BUB3
[362]		P61750	1.13095	1.08142	0.840336	20396.8	MOUSE	ADP-ribosylation factor 4
[363]		P62320	1.17866	1.07868	0.980392	13916.4	MOUSE	Small nuclear ribonucleoprotein Sm D3
[364]		Q9CWN7	1.62671	-	0.847458	54959.7	MOUSE	CCR4-NOT transcription complex subunit 11
[365]		Q8R3H9	0.95	1.43581	0.990099	44339.3	MOUSE	Tetratricopeptide repeat protein 4
[366]		Q9WUP7	0.940594	-	0.970874	37617.2	MOUSE	Ubiquitin carboxyl-terminal hydrolase isozyme L5
[367]		Q9Z0E0	1.03712	0.890052	0.684932	78896	MOUSE	Neurochondrin
[368]		Q8BG81	0.798319	0.857719	0.793651	46132.9	MOUSE	Polymerase delta-interacting protein 3
[369]		P56480	1.42643	0.97032	1.04603	56301	MOUSE	ATP synthase subunit beta, mitochondrial
[370]		Q9D0F6	1.08077	1.15646	0.819672	38096.5	MOUSE	Replication factor C subunit 5
[371]		Q99L45	1.12827	0.893796	0.925926	38092.4	MOUSE	Eukaryotic translation initiation factor 2 subunit 2
[372]		Q6A068	0.730769	0.941307	0.699301	92190.3	MOUSE	Cell division cycle 5-like protein
[373]		Q8K4M5	0.990615	0.870902	0.869565	20996.2	MOUSE	COMM domain-containing protein 1
[374]		Q921J4	1.5625	1.39573	0.52356	24183	MOUSE	Ubiquitin-conjugating enzyme E2 S
[375]		Q76MZ3	1.21483	1.1471	0.909091	65323.2	MOUSE	Serine/threonine-protein phosphatase 2A 65 kDa regulatory subunit A alpha isoform
[376]		Q8VE88	0.59375	0.286195	1.41844	54045.2	MOUSE	Protein FAM114A2
[377]		Q8CHP5	1.13772	0.960452	1.0101	22689.8	MOUSE	Partner of Y14 and mago
[378]		P46061	2.17391	1.18881	1.25313	63531.5	MOUSE	Ran GTPase-activating protein 1
[379]		Q9CZP7	1.08696	1.05198	1.08108	38439.6	MOUSE	Hsp90 co-chaperone Cdc37-like 1
[380]		Q8BVY0	0.959596	0.860324	0.0146628	50421.7	MOUSE	Ribosomal L1 domain-containing protein 1
[381]		Q62189	1.19347	1.01311	0.892857	31835.6	MOUSE	U1 small nuclear ribonucleoprotein A
[381-1]	3	Q9CQI7	1.05205	1.01311	0.787402	25323.5	MOUSE	U2 small nuclear ribonucleoprotein B''
[382]		Q9DBR1	1.2533	1.14401	1.1919	108688	MOUSE	5'-3' exoribonuclease 2
[383]		Q8VC52	1.22898	1.18056	0.970874	22462.8	MOUSE	RNA-binding protein with multiple splicing 2
[384]		P43247	-	-	2.28833	104152	MOUSE	DNA mismatch repair protein Msh2
[385]		P14685	1.03825	-	0.78125	60718.8	MOUSE	26S proteasome non-ATPase regulatory subunit 3
[386]		Q8K298	-	-	1.16686	122795	MOUSE	Anillin
[387]		Q9EP97	1.7658	-	0.699301	64403.7	MOUSE	Sentrin-specific protease 3
[388]		Q9CQF3	1.07223	0.978136	1.09051	26240.5	MOUSE	Cleavage and polyadenylation specificity factor subunit 5
[389]		Q99J62	0.975359	1.46805	1.11483	39867.1	MOUSE	Replication factor C subunit 4
[390]		Q61753	1.44597	1.71717	0.75188	56586.1	MOUSE	D-3-phosphoglycerate dehydrogenase
[391]		P28656	0.719697	0.833333	0.763359	45345.5	MOUSE	Nucleosome assembly protein 1-like 1
[392]		Q91Z38	0.940594	0.97032	0.847458	33263.2	MOUSE	Tetratricopeptide repeat protein 1
[393]		P37913	-	-	0.617284	102290	MOUSE	DNA ligase 1
[394]		Q80UW8	0.848214	0.928962	0.787402	24570.5	MOUSE	DNA-directed RNA polymerases I, II, and III subunit RPABC1
[395]		Q8R570	-	-	0.704225	46524.7	MOUSE	Synaptosomal-associated protein 47
[396]		Q9JJT0	0.772358	0.779817	0.675676	40841	MOUSE	RNA 3'-terminal phosphate cyclase-like protein
[397]		Q8BJ71	1.32682	1.34921	0.854701	93281.9	MOUSE	Nuclear pore complex protein Nup93
[398]		Q99NB9	-	-	0.763359	145818	MOUSE	Splicing factor 3B subunit 1
[399]		Q9WVB0	1.18159	0.923913	1.17371	21816.1	MOUSE	RNA-binding protein with multiple splicing
[400]		Q3U0V1	1.49137	0.217391	0.980392	76776.1	MOUSE	Far upstream element-binding protein 2
[401]		O55135	1.05438	1.06784	0.952381	26511.3	MOUSE	Eukaryotic translation initiation factor 6
[402]		P30681	1.51274	1.45798	2.15054	24162.1	MOUSE	High mobility group protein B2
[402-1]	4	P63158	-	1.26488	2.15054	24894	MOUSE	High mobility group protein B1
[403]		A2BE28	1.72727	1.28012	1.11483	89415.1	MOUSE	Ribosomal biogenesis protein LAS1L
[404]		Q8K3F7	-	1.46805	1.10742	41462	MOUSE	L-threonine 3-dehydrogenase, mitochondrial
[405]		Q8CJ40	1.18454	0.982659	0.840336	226946	MOUSE	Rootletin
[406]		Q01320	-	1.42379	1.11857	172792	MOUSE	DNA topoisomerase 2-alpha
[407]		Q8BXC6	0.92233	0.801887	0.787402	22848.4	MOUSE	COMM domain-containing protein 2
[408]		Q62241	1.27175	1.03281	1.06724	17363.9	MOUSE	U1 small nuclear ribonucleoprotein C
[409]		P11103	0.986501	0.988372	0.892857	113101	MOUSE	Poly [ADP-ribose] polymerase 1
[410]		P14873	0.87156	0.856855	0.862069	270257	MOUSE	Microtubule-associated protein 1B
[410-1]	3	Q9QYR6	0.344203	0.225464	0.471698	300142	MOUSE	Microtubule-associated protein 1A
[411]		Q9CPP0	0.989583	0.952915	0.892857	19023.6	MOUSE	Nucleoplasmin-3
[412]		Q8R1N4	-	1	0.970874	40890.6	MOUSE	NudC domain-containing protein 3
[413]		Q8VE47	1.94672	0.961538	0.617284	44790.2	MOUSE	Ubiquitin-like modifier-activating enzyme 5
[414]		Q9D0I8	1.04053	1.01918	0.75188	27545.9	MOUSE	mRNA turnover protein 4 homolog
[415]		P17427	1.26162	0.981524	1.09051	104017	MOUSE	AP-2 complex subunit alpha-2
[416]		Q7TT37	1.12961	-	0.763359	149585	MOUSE	Elongator complex protein 1
[417]		P57780	0.714286	0.708333	1.0101	104978	MOUSE	Alpha-actinin-4
[418]		Q64327	1.96281	0.946548	1.52207	18584.2	MOUSE	Male-enhanced antigen 1
[419]		P50247	0.855856	0.85	1.04822	47688.6	MOUSE	Adenosylhomocysteinase
[420]		O70194	-	-	1.07759	63989.3	MOUSE	Eukaryotic translation initiation factor 3 subunit D
[421]		P62075	0.58642	0.598592	0.537634	10458.1	MOUSE	Mitochondrial import inner membrane translocase subunit Tim13
[422]		P18760	2.9321	0.871795	1.25156	18559.7	MOUSE	Cofilin-1
[423]		P35293	1.11502	0.32567	1.53139	23035.4	MOUSE	Ras-related protein Rab-18
[424]		Q9DBJ1	-	1.08974	1.49925	28832.2	MOUSE	Phosphoglycerate mutase 1
[425]		Q9CZX0	-	0.904255	0.990099	62385.6	MOUSE	Elongator complex protein 3
[426]		Q9CWM4	0.826087	0.85	0.854701	14254.7	MOUSE	Prefoldin subunit 1
[427]		O70126	1.04972	1.02286	1.11483	39384.6	MOUSE	Aurora kinase B
[428]		Q9CW46	1.05556	0.794393	0.680272	79382.6	MOUSE	Ribonucleoprotein PTB-binding 1
[429]		O35593	1.097	0.915948	0.729927	34577.4	MOUSE	26S proteasome non-ATPase regulatory subunit 14
[430]		Q91WK2	1.03486	0.745614	0.917431	39832.6	MOUSE	Eukaryotic translation initiation factor 3 subunit H
[431]		P70296	1.40533	1.28983	1.8622	20830.6	MOUSE	Phosphatidylethanolamine-binding protein 1
[432]		P16254	-	0.817308	-	12509.8	MOUSE	Signal recognition particle 14 kDa protein
[433]		Q8C5L3	1.67845	1.19887	0.970874	59711.2	MOUSE	CCR4-NOT transcription complex subunit 2
[434]		Q9D0B6	-	0.900424	-	22223.7	MOUSE	Protein PBDC1
[435]		P09411	1.21951	-	1.11607	44550.9	MOUSE	Phosphoglycerate kinase 1
[436]		P35564	1.35328	0.871795	0.632911	67278.5	MOUSE	Calnexin
[437]		Q60930	0.931373	0.745614	0.775194	31733.1	MOUSE	Voltage-dependent anion-selective channel protein 2
[438]		O35075	0.753968	0.885417	0.769231	32970.6	MOUSE	Vacuolar protein sorting-associated protein 26C
[439]		Q61598	1.02592	-	1.06045	50537.6	MOUSE	Rab GDP dissociation inhibitor beta
[440]		Q9JKV1	1.06027	0.928962	0.826446	42060.5	MOUSE	Proteasomal ubiquitin receptor ADRM1
[441]		O89086	1.5625	1.13941	1.15607	16604.8	MOUSE	RNA-binding protein 3
[442]		Q07813	-	1.0303	0.704225	21394.8	MOUSE	Apoptosis regulator BAX
[443]		Q9D2V5	1.01604	0.923913	0.763359	43408.4	MOUSE	Protein AAR2 homolog
[444]		Q5SF07	1.06622	0.952915	0.205339	65584.4	MOUSE	Insulin-like growth factor 2 mRNA-binding protein 2
[445]		Q8N9S3	1.52979	1.19048	1.09529	37648.5	MOUSE	Activator of 90 kDa heat shock protein ATPase homolog 2
[446]		Q08297	1.25495	-	1.15473	36971.5	MOUSE	DNA repair protein RAD51 homolog 1
[447]		P42208	1.14183	1.10821	0.952381	41525.9	MOUSE	Septin-2
[448]		P83887	1.29252	-	0.854701	51101.3	MOUSE	Tubulin gamma-1 chain
[449]		Q9D083	-	0.794393	0.704225	23416.6	MOUSE	Kinetochore protein Spc24
[450]		P62305	0.855856	0.485714	0.689655	10803.7	MOUSE	Small nuclear ribonucleoprotein E
[451]		Q9QY76	1.08324	1.11695	0.699301	26946.4	MOUSE	Vesicle-associated membrane protein-associated protein B
[452]		Q9D1J3	1.37085	-	-	23532.9	MOUSE	SAP domain-containing ribonucleoprotein
[453]		P59048	1.15152	0.996483	0.757576	15382.1	MOUSE	p53 and DNA damage-regulated protein 1
[454]		Q9EST3	-	-	0.934579	107986	MOUSE	Eukaryotic translation initiation factor 4E transporter
[455]		P43276	0.703704	-	0.671141	22576.3	MOUSE	Histone H1.5
[456]		P34022	1.1432	1.37318	1.79856	23596.6	MOUSE	Ran-specific GTPase-activating protein
[457]		Q8BWY3	1.33992	1.35566	1.11235	49031.3	MOUSE	Eukaryotic peptide chain release factor subunit 1
[458]		Q99JI6	-	1.3302	0.724638	20825	MOUSE	Ras-related protein Rap-1b
[459]		P47753	1.31579	0.863821	0.909091	32940	MOUSE	F-actin-capping protein subunit alpha-1
[460]		P47757	1.27005	0.939227	1.01833	31345.7	MOUSE	F-actin-capping protein subunit beta
[461]		Q922Q4	0.279412	1.01675	0.970874	33659.4	MOUSE	Pyrroline-5-carboxylate reductase 2
[462]		P62309	1.14046	-	1.13122	8496.2	MOUSE	Small nuclear ribonucleoprotein G
[463]		Q3THE2	0.97137	0.817308	0.917431	19779.3	MOUSE	Myosin regulatory light chain 12B
[464]		Q99KJ8	0.248042	-	-	44117.2	MOUSE	Dynactin subunit 2
[465]		Q9EQK5	-	0.817308	0.826446	95925.1	MOUSE	Major vault protein
[466]		Q8BYN3	1.60745	0.418719	0.416667	46145.9	MOUSE	Inositol-tetrakisphosphate 1-kinase
[467]		Q9CQC9	0.616883	0.456989	1.30208	22382	MOUSE	GTP-binding protein SAR1b
[468]		P62715	1.00105	1.06516	0.925926	35575.4	MOUSE	Serine/threonine-protein phosphatase 2A catalytic subunit beta isoform
[468-1]	1	P63330	1.00105	0.138662	0.925926	35608.5	MOUSE	Serine/threonine-protein phosphatase 2A catalytic subunit alpha isoform
[469]		P34884	1.6129	1.97674	2.77008	12504.4	MOUSE	Macrophage migration inhibitory factor
[470]		Q62448	1.67254	-	1.38504	102106	MOUSE	Eukaryotic translation initiation factor 4 gamma 2
[471]		P07724	0.0708955	0.0611511	-	68693.2	MOUSE	Albumin
[472]		O54984	0.811966	0.708333	0.769231	38823.2	MOUSE	ATPase GET3
[473]		Q61699	0.863636	0.752212	0.869565	96408.3	MOUSE	Heat shock protein 105 kDa
[474]		Q9CX56	0.980392	-	0.980392	39930.6	MOUSE	26S proteasome non-ATPase regulatory subunit 8
[475]		Q6PFR5	1.17139	1.38889	0.970874	32316.4	MOUSE	Transformer-2 protein homolog alpha
[476]		Q9CWK3	1.24346	-	0.909091	37694.7	MOUSE	CD2 antigen cytoplasmic tail-binding protein 2
[477]		Q80U78	-	-	0.675676	126620	MOUSE	Pumilio homolog 1
[478]		Q9CQ02	0.863636	0.801887	0.793651	21860.5	MOUSE	COMM domain-containing protein 4
[479]		P61759	0.798319	0.765766	0.862069	22435.8	MOUSE	Prefoldin subunit 3
[480]		Q9JII5	2.18894	-	1.83824	43214.6	MOUSE	DAZ-associated protein 1
[481]		Q61545	1.16137	0.916936	0.884956	68462.8	MOUSE	RNA-binding protein EWS
[482]		Q9D4H1	1.57025	-	0.645161	103960	MOUSE	Exocyst complex component 2
[483]		P02301	1.04053	0.598592	0.387597	15315	MOUSE	Histone H3.3C
[484]		Q8JZQ9	0.92233	1.05198	1.27389	91371	MOUSE	Eukaryotic translation initiation factor 3 subunit B
[485]		O88543	-	-	0.909091	47832.5	MOUSE	COP9 signalosome complex subunit 3
[486]		P49722	1.15713	0.981524	0.75188	25926.8	MOUSE	Proteasome subunit alpha type-2
[487]		P42209	1.2533	-	0.694444	42020.2	MOUSE	Septin-1
[488]		P62862	0.913462	-	0.70922	6647.9	MOUSE	40S ribosomal protein S30
[489]		P62869	0.87963	0.926936	1.08578	13170	MOUSE	Elongin-B
[490]		P61089	-	1.16758	-	17138	MOUSE	Ubiquitin-conjugating enzyme E2 N
[491]		Q9D6Z1	-	0.998825	1.05042	64464.9	MOUSE	Nucleolar protein 56
[492]		Q6PGG6	0.87963	-	0.877193	65195.5	MOUSE	Guanine nucleotide-binding protein-like 3-like protein
[493]		P26369	-	1	0.787402	53517.5	MOUSE	Splicing factor U2AF 65 kDa subunit
[494]		Q64737	1.18602	1.01432	1.50376	107504	MOUSE	Trifunctional purine biosynthetic protein adenosine-3
[495]		Q9D0D4	1.1772	1.08418	0.862069	35274.6	MOUSE	Probable dimethyladenosine transferase
[496]		Q9JJY4	1.88492	0.92091	0.806452	91711	MOUSE	Probable ATP-dependent RNA helicase DDX20
[497]		P51807	0.940594	1.01311	0.917431	12483.2	MOUSE	Dynein light chain Tctex-type 1
[498]		Q91W96	-	-	0.854701	91708.6	MOUSE	Anaphase-promoting complex subunit 4
[499]		P54103	1.05088	1.1039	1.00301	71722.4	MOUSE	DnaJ homolog subfamily C member 2
[500]		Q3TLD5	-	0.726496	0.724638	59084.5	MOUSE	Unconventional prefoldin RPB5 interactor
[501]		P19157	-	1.14865	1.04603	23609.4	MOUSE	Glutathione S-transferase P 1
[502]		P17751	0.896226	0.794393	1.15207	26712.9	MOUSE	Triosephosphate isomerase
[503]		Q9CQA9	-	1.30769	1.52207	20667.3	MOUSE	Cancer-related nucleoside-triphosphatase homolog
[504]		Q3TLH4	-	-	0.833333	310895	MOUSE	Protein PRRC2C
[505]		Q8VCW2	0.0605096	0.0685484	0.0403226	48921.9	MOUSE	Keratin, type I cytoskeletal 25
[506]		P61924	1.28901	-	0.555556	20198.4	MOUSE	Coatomer subunit zeta-1
[507]		Q3UJB9	-	-	1.15741	152485	MOUSE	Enhancer of mRNA-decapping protein 4
[508]		Q9CZM2	-	1.34494	0.813008	24146.3	MOUSE	60S ribosomal protein L15
[509]		Q8BTM8	-	0.772727	0.892857	281224	MOUSE	Filamin-A
[510]		Q8VI75	1.18306	1.2301	1.02564	119276	MOUSE	Importin-4
[511]		P29391	-	0.961538	0.925926	20802.6	MOUSE	Ferritin light chain 1
[512]		Q9CQU5	-	-	0.689655	28713.1	MOUSE	ZW10 interactor
[513]		Q04692	-	-	0.471698	116452	MOUSE	SWI/SNF-related matrix-associated actin-dependent regulator of chromatin subfamily A containing DEAD/H box 1
[514]		Q63829	0.840708	0.801887	0.42735	22037.1	MOUSE	COMM domain-containing protein 3
[515]		P61957	2.76163	3.125	2.40964	10871.3	MOUSE	Small ubiquitin-related modifier 2
[516]		Q8CCS6	0.87156	-	0.943396	32296.8	MOUSE	Polyadenylate-binding protein 2
[517]		P67778	1.31034	1.47059	1.25786	29820.3	MOUSE	Prohibitin
[518]		Q9EPK7	-	-	0.884956	123812	MOUSE	Exportin-7
[519]		Q9CYZ2	0.545977	0.480226	0.546448	24043.1	MOUSE	Tumor protein D54
[520]		Q9D1M0	1.10209	0.92291	0.819672	35566	MOUSE	Protein SEC13 homolog
[521]		Q9CPS7	0.742187	-	-	27453.8	MOUSE	RNA-binding protein PNO1
[522]		Q9CPT5	1.2533	1.26866	1.02564	21139.4	MOUSE	Nucleolar protein 16
[523]		Q8VDW0	1.07588	-	1.10619	49067.9	MOUSE	ATP-dependent RNA helicase DDX39A
[524]		Q8VEM8	1.46154	-	1.0917	39632.7	MOUSE	Phosphate carrier protein, mitochondrial
[525]		Q9CYI4	0.863636	0.590278	1.09529	43934.5	MOUSE	Putative RNA-binding protein Luc7-like 1
[526]		Q8CFI7	-	1.57116	0.877193	133912	MOUSE	DNA-directed RNA polymerase II subunit RPB2
[527]		Q921Y2	-	0.917927	0.862069	21777.3	MOUSE	U3 small nucleolar ribonucleoprotein protein IMP3
[528]		Q9QYH6	0.778689	0.685484	0.833333	85670.6	MOUSE	Melanoma-associated antigen D1
[529]		Q6ZQ58	-	-	0.952381	121126	MOUSE	La-related protein 1
[530]		Q99LD9	-	-	0.869565	38897.9	MOUSE	Translation initiation factor eIF-2B subunit beta
[531]		Q9D0T1	2.00422	1.22478	1.15607	14173.7	MOUSE	NHP2-like protein 1
[532]		Q91WN1	-	1.09961	1.19474	30059.2	MOUSE	DnaJ homolog subfamily C member 9
[533]		Q922S8	-	0.794393	0.689655	81086.1	MOUSE	Kinesin-like protein KIF2C
[534]		Q00547	1.082	0.794393	0.952381	91786.2	MOUSE	Hyaluronan mediated motility receptor
[535]		Q99NH0	-	0.204327	0.581395	274215	MOUSE	Ankyrin repeat domain-containing protein 17
[536]		Q8BU03	1.12426	1.0559	1.1274	102911	MOUSE	Periodic tryptophan protein 2 homolog
[537]		Q91VM3	1.19497	1.01553	0.694444	39787.8	MOUSE	WD repeat domain phosphoinositide-interacting protein 4
[538]		Q9D8M4	-	-	1.09529	28543.9	MOUSE	60S ribosomal protein L7-like 1
[539]		Q8R574	-	-	0.826446	40881.1	MOUSE	Phosphoribosyl pyrophosphate synthase-associated protein 2
[540]		A2AN08	1.03149	-	0.840336	572295	MOUSE	E3 ubiquitin-protein ligase UBR4
[541]		O70310	-	-	1.17509	56888.9	MOUSE	Glycylpeptide N-tetradecanoyltransferase 1
[542]		Q9WTX5	-	-	5.84795	18672.2	MOUSE	S-phase kinase-associated protein 1
[543]		O88796	-	-	0.793651	29473.7	MOUSE	Ribonuclease P protein subunit p30
[544]		Q64012	1.17429	-	-	33188.2	MOUSE	RNA-binding protein Raly
[545]		Q9QXA5	1.08945	0.955056	1.11235	15076.5	MOUSE	U6 snRNA-associated Sm-like protein LSm4
[546]		Q61191	-	1.07323	0.900901	210439	MOUSE	Host cell factor 1
[547]		Q61496	-	0.851703	1.29702	76470.9	MOUSE	ATP-dependent RNA helicase DDX4
[548]		P62315	1.25165	-	-	13281.7	MOUSE	Small nuclear ribonucleoprotein Sm D1
[549]		Q6P8I4	1.18306	1.01918	1.3624	18963.1	MOUSE	PEST proteolytic signal-containing nuclear protein
[550]		Q8BFQ8	0.896226	1.07459	0.75188	23277.7	MOUSE	Glutamine amidotransferase-like class 1 domain-containing protein 1
[551]		Q9CY66	1.03939	0.947603	0.970874	23474.2	MOUSE	H/ACA ribonucleoprotein complex subunit 1
[552]		Q8CI04	1.66375	1.08974	1.04167	93283.6	MOUSE	Conserved oligomeric Golgi complex subunit 3
[553]		P17897	0.100105	-	0.0763359	16794.4	MOUSE	Lysozyme C-1
[554]		Q61881	-	-	0.877193	81211.5	MOUSE	DNA replication licensing factor MCM7
[555]		O55125	1.27346	-	1.02881	33363.5	MOUSE	Protein NipSnap homolog 1
[556]		Q3UA16	1.18306	1.13182	0.892857	26457.4	MOUSE	Kinetochore protein Spc25
[557]		Q8VH51	0.742187	-	0.763359	59407.1	MOUSE	RNA-binding protein 39
[558]		Q8C0L8	1.83752	-	0.714286	91392.3	MOUSE	Conserved oligomeric Golgi complex subunit 5
[559]		Q6P5E6	2.13964	-	0.350877	66049.7	MOUSE	ADP-ribosylation factor-binding protein GGA2
[560]		Q9CQE6	-	-	0.689655	22942.8	MOUSE	Histone chaperone ASF1A
[561]		P48024	-	-	1.21359	12746.6	MOUSE	Eukaryotic translation initiation factor 1
[562]		Q99KX1	1.07832	-	1.01523	28055.5	MOUSE	Myeloid leukemia factor 2
[563]		P27546	-	0.794393	0.884956	117430	MOUSE	Microtubule-associated protein 4
[564]		P97477	-	-	0.775194	44772.4	MOUSE	Aurora kinase A
[565]		P63038	1.26667	-	-	60956	MOUSE	60 kDa heat shock protein, mitochondrial
[566]		Q9WUA2	0.772358	1.15176	0.806452	65697.8	MOUSE	Phenylalanine--tRNA ligase beta subunit
[567]		Q9D287	-	-	0.980392	26131.7	MOUSE	Pre-mRNA-splicing factor SPF27
[568]		P18524	0.0123698	0.0164093	0.0173913	12866.1	MOUSE	Ig heavy chain V region RF
[569]		Q9R1P4	-	0.85	0.826446	29546.8	MOUSE	Proteasome subunit alpha type-1
[570]		P54276	-	-	0.917431	151085	MOUSE	DNA mismatch repair protein Msh6
[571]		Q08288	1.05322	-	0.900901	43735.9	MOUSE	Cell growth-regulating nucleolar protein
[572]		Q61171	0.811966	-	0.813008	21778.8	MOUSE	Peroxiredoxin-2
[573]		O08585	1.00317	-	-	25604.3	MOUSE	Clathrin light chain A
[574]		Q8BWW4	1.83044	2.2973	0.900901	79764.1	MOUSE	La-related protein 4
[575]		Q8K4Z5	0.996852	-	0.854701	88545.6	MOUSE	Splicing factor 3A subunit 1
[576]		P63028	-	-	1.52905	19462.4	MOUSE	Translationally-controlled tumor protein
[577]		P51660	2.45478	-	1.63666	79482.5	MOUSE	Peroxisomal multifunctional enzyme type 2
[578]		O88844	-	-	1.12108	46674.9	MOUSE	Isocitrate dehydrogenase [NADP] cytoplasmic
[579]		Q01730	-	-	0.990099	31550.5	MOUSE	Ras suppressor protein 1
[580]		Q6DFV5	-	-	1.00806	219882	MOUSE	Probable helicase with zinc finger domain
[581]		Q9D937	1.49842	-	0.574713	14098.7	MOUSE	Uncharacterized protein C11orf98 homolog
[582]		O09106	0.44186	0.447368	1.02459	55075.5	MOUSE	Histone deacetylase 1
[583]		Q9D8N2	0.904762	0.852558	0.813008	40421.3	MOUSE	DENN domain-containing protein 10
[584]		P97304	0.855856	0.801887	0.793651	15072.4	MOUSE	DNA-directed RNA polymerases I and III subunit RPAC2
[585]		Q61216	-	-	0.900901	80223.4	MOUSE	Double-strand break repair protein MRE11
[586]		Q62446	-	1.39116	1.71233	25148	MOUSE	Peptidyl-prolyl cis-trans isomerase FKBP3
[587]		O08709	-	-	0.847458	24870.9	MOUSE	Peroxiredoxin-6
[588]		P62911	-	0.932018	0.75188	15859.9	MOUSE	60S ribosomal protein L32
[589]		Q80TM9	-	0.987224	0.694444	175014	MOUSE	Nischarin
[590]		Q99MR1	-	-	0.540541	116239	MOUSE	GRB10-interacting GYF protein 1
[591]		Q9CZ30	3.38078	-	-	44729.9	MOUSE	Obg-like ATPase 1
[592]		Q9QZ88	-	-	0.37594	20495.9	MOUSE	Vacuolar protein sorting-associated protein 29
[593]		Q60953	1.26162	1.33648	-	98243	MOUSE	Protein PML
[594]		Q99JX7	-	-	0.757576	70300.1	MOUSE	Nuclear RNA export factor 1
[595]		Q8CCB4	0.748031	-	-	94424	MOUSE	Vacuolar protein sorting-associated protein 53 homolog
[596]		Q8CHY3	-	-	0.980392	75848.8	MOUSE	Dymeclin
[597]		Q148V8	-	-	0.793651	131116	MOUSE	Protein FAM83H
[598]		Q62093	-	0.918919	1.26263	25476.5	MOUSE	Serine/arginine-rich splicing factor 2
[599]		P46935	0.818966	0.979263	1.04932	102707	MOUSE	E3 ubiquitin-protein ligase NEDD4
[600]		Q8BJU0	0.683453	-	-	34322.7	MOUSE	Small glutamine-rich tetratricopeptide repeat-containing protein alpha
[601]		Q922L6	-	-	0.724638	66276.2	MOUSE	Negative elongation factor D
[602]		Q9EPL8	0.863636	-	0.724638	119488	MOUSE	Importin-7
[603]		Q9D1G5	3.1457	-	1.04275	26760.4	MOUSE	Leucine-rich repeat-containing protein 57
[604]		P84091	-	-	0.952381	49655.1	MOUSE	AP-2 complex subunit mu
[605]		P26040	1.35714	-	1.287	69407.4	MOUSE	Ezrin
[606]		Q8VCE2	0.913462	-	-	41598.3	MOUSE	GPN-loop GTPase 1
[607]		P97760	0.88785	-	-	31443.4	MOUSE	DNA-directed RNA polymerase II subunit RPB3
[608]		Q80XE1	2.23529	-	-	58683	MOUSE	Synembryn-B
[609]		O35344	-	1.00236	0.680272	57773.3	MOUSE	Importin subunit alpha-4
[610]		P62892	0.87963	0.88634	0.819672	6406.7	MOUSE	60S ribosomal protein L39
[611]		Q8C052	1.22423	-	-	102940	MOUSE	Microtubule-associated protein 1S
[612]		Q9WUK4	-	1.07188	-	38725.1	MOUSE	Replication factor C subunit 2
[613]		O70325	-	1.00592	1.07643	22228.9	MOUSE	Phospholipid hydroperoxide glutathione peroxidase
[614]		P58854	-	-	0.70922	103470	MOUSE	Gamma-tubulin complex component 3
[615]		P67871	1.29076	-	1.04493	24942.7	MOUSE	Casein kinase II subunit beta
[616]		Q9QY66	-	0.732759	-	42897	MOUSE	Zinc finger HIT domain-containing protein 2
[617]		P45376	-	-	1.64204	35732.6	MOUSE	Aldo-keto reductase family 1 member B1
[618]		Q8CGY8	0.772358	-	0.990099	116953	MOUSE	UDP-N-acetylglucosamine--peptide N-acetylglucosaminyltransferase 110 kDa subunit
[619]		A2ASS6	7.85124	-	-	3.90652e+06	MOUSE	Titin
[620]		Q3TQQ9	0.363985	-	-	101223	MOUSE	Uncharacterized protein C1orf112 homolog
[621]		Q810D6	-	0.89568	-	49224.3	MOUSE	Glutamate-rich WD repeat-containing protein 1
[622]		Q9D0D5	-	-	1.65563	49593.8	MOUSE	General transcription factor IIE subunit 1
[623]		Q5SWD9	0.35316	0.317164	-	92105.9	MOUSE	Pre-rRNA-processing protein TSR1 homolog
[624]		Q8R5C5	1.10723	0.984936	-	42281.7	MOUSE	Beta-centractin
[625]		Q9WVA4	0.87156	-	-	22395.6	MOUSE	Transgelin-2
[626]		P63005	-	0.857719	0.840336	46670.5	MOUSE	Platelet-activating factor acetylhydrolase IB subunit beta
[627]		P62743	1.20406	1.10104	1.04603	17017.9	MOUSE	AP-2 complex subunit sigma
[628]		A6H5Z3	-	-	0.952381	94130.4	MOUSE	Exocyst complex component 6B
[629]		Q8CG47	-	0.959368	1.04822	146896	MOUSE	Structural maintenance of chromosomes protein 4
[630]		Q3U821	-	-	1.43062	94037.5	MOUSE	WD repeat-containing protein 75
[631]		P14901	-	1.09961	1.52207	32929	MOUSE	Heme oxygenase 1
[632]		O35226	0.88785	-	-	40704.1	MOUSE	26S proteasome non-ATPase regulatory subunit 4
[633]		P52479	-	-	0.869565	87022.8	MOUSE	Ubiquitin carboxyl-terminal hydrolase 10
[634]		P61961	1.73993	-	0.581395	9117.7	MOUSE	Ubiquitin-fold modifier 1
[635]		Q8R326	1.76909	-	2.57069	58759	MOUSE	Paraspeckle component 1
[636]		Q3UPL0	-	-	1.00301	133570	MOUSE	Protein transport protein Sec31A
[637]		Q8R4R6	1.21173	-	-	34786	MOUSE	Nucleoporin NUP35
[638]		P23492	-	0.89852	-	32277.4	MOUSE	Purine nucleoside phosphorylase
[639]		P61327	-	1.38889	2.21729	17163.8	MOUSE	Protein mago nashi homolog
[640]		Q9WVR4	0.987526	-	0.813008	73743.3	MOUSE	Fragile X mental retardation syndrome-related protein 2
[640-1]	2	Q61584	1.60202	-	0.862069	76222.6	MOUSE	Fragile X mental retardation syndrome-related protein 1
[641]		Q4FZG7	0.669014	-	-	11283	MOUSE	Putative mitochondrial import inner membrane translocase subunit Tim8 A-B
[642]		Q9ESX5	1.08324	-	1.15207	57402.1	MOUSE	H/ACA ribonucleoprotein complex subunit DKC1
[643]		Q64674	-	0.53125	-	33995.2	MOUSE	Spermidine synthase
[644]		Q99PP7	-	0.664062	-	123844	MOUSE	E3 ubiquitin-protein ligase TRIM33
[645]		Q5F2E7	-	-	0.75188	75657.4	MOUSE	Nuclear fragile X mental retardation-interacting protein 2
[646]		Q9CWR2	-	-	1.19474	49126.7	MOUSE	Histone-lysine N-methyltransferase SMYD3
[647]		Q9JJA4	-	-	-	47346.9	MOUSE	Ribosome biogenesis protein WDR12
[648]		P28740	-	0.953984	0.909091	79757.1	MOUSE	Kinesin-like protein KIF2A
[649]		Q8BTW3	1.30854	-	-	28370.4	MOUSE	Exosome complex component MTR3
[650]		Q4VAA2	1.97917	-	-	29729.2	MOUSE	Protein CDV3
[651]		Q9ERK4	-	-	0.892857	110456	MOUSE	Exportin-2
[652]		P11157	-	-	0.961538	45096.1	MOUSE	Ribonucleoside-diphosphate reductase subunit M2
[653]		Q2L4X1	1.36888	-	1.09529	48063.6	MUSMM	Basic leucine zipper and W2 domain-containing protein 2
[654]		Q8QZX2	-	-	0.699301	66309	MOUSE	HAUS augmin-like complex subunit 3
[655]		Q08943	-	-	0.367647	80861.1	MOUSE	FACT complex subunit SSRP1
[656]		Q8BT07	1.23859	-	-	53930.8	MOUSE	Centrosomal protein of 55 kDa
[657]		Q505F5	-	1.14865	-	63590.8	MOUSE	Leucine-rich repeat-containing protein 47
[658]		Q99PM9	-	-	0.675676	29404.4	MOUSE	Uridine-cytidine kinase 2
[659]		Q5XJY5	-	-	0.401606	57229.9	MOUSE	Coatomer subunit delta
[660]		Q80Y81	-	-	0.729927	92720.2	MOUSE	Zinc phosphodiesterase ELAC protein 2
[661]		Q8R1U1	-	-	0.571429	88661.5	MOUSE	Conserved oligomeric Golgi complex subunit 4
[662]		Q9CQ71	-	-	-	13583.9	MOUSE	Replication protein A 14 kDa subunit
[663]		B2RS91	2.60274	1.32812	1.39665	74518.3	MOUSE	RNA polymerase I-specific transcription initiation factor RRN3
[664]		Q9DCG9	1.01064	-	-	14141.4	MOUSE	Multifunctional methyltransferase subunit TRM112-like protein
[665]		Q9R1Q7	1.29781	-	-	16607.7	MOUSE	Proteolipid protein 2
[666]		Q920B9	-	-	0.3663	119826	MOUSE	FACT complex subunit SPT16
[667]		Q5SWU9	-	-	0.132979	265259	MOUSE	Acetyl-CoA carboxylase 1
[668]		Q9WUK2	-	-	1.89036	27341.2	MOUSE	Eukaryotic translation initiation factor 4H
[669]		A2AGT5	-	0.990676	-	225637	MOUSE	Cytoskeleton-associated protein 5
[670]		Q8C142	-	-	0.558659	33975.7	MOUSE	Low density lipoprotein receptor adapter protein 1
[671]		O70405	-	-	0.900901	112464	MOUSE	Serine/threonine-protein kinase ULK1
[672]		P62307	1.2533	-	0.990099	9725.3	MOUSE	Small nuclear ribonucleoprotein F
[673]		Q8BFY9	-	0.979263	-	102358	MOUSE	Transportin-1
[674]		Q5SUR0	-	-	0.892857	144631	MOUSE	Phosphoribosylformylglycinamidine synthase
[675]		Q8BK63	-	-	0.884956	38915.2	MOUSE	Casein kinase I isoform alpha
[676]		Q8VHN8	-	1.25	-	23414.4	MOUSE	Tudor-interacting repair regulator protein
[677]		Q8K363	-	-	1.01626	74181.5	MOUSE	ATP-dependent RNA helicase DDX18
[678]		O35841	1.14046	-	-	56785.7	MOUSE	Apoptosis inhibitor 5
[679]		Q9CZU3	0.995807	-	-	117638	MOUSE	Exosome RNA helicase MTR4
[680]		Q9CWR8	-	-	0.833333	47993.2	MOUSE	DNA (cytosine-5)-methyltransferase 3-like
[681]		Q9D565	-	0.0123367	0.0189394	123894	MOUSE	WD repeat-containing protein 64
[682]		Q9DB20	-	0.989523	1.14286	23363.8	MOUSE	ATP synthase subunit O, mitochondrial
[683]		P70279	1.60202	-	1.60514	41234.9	MOUSE	Surfeit locus protein 6
[684]		Q9JKC7	1.21328	-	-	49509.9	MOUSE	AP-4 complex subunit mu-1
[685]		Q8BGJ9	-	0.963719	0.884956	25836	MOUSE	Splicing factor U2AF 26 kDa subunit
[686]		Q80U70	-	1.41667	-	83026.5	MOUSE	Polycomb protein Suz12
[687]		F6ZDS4	-	1.21083	-	273992	MOUSE	Nucleoprotein TPR
[688]		Q9D1D4	-	1.11549	-	24911	MOUSE	Transmembrane emp24 domain-containing protein 10
[689]		P62627	1.01387	-	0.925926	10989.8	MOUSE	Dynein light chain roadblock-type 1
[690]		Q80UZ2	2.13004	-	-	79559.7	MOUSE	Protein SDA1 homolog
[691]		Q8CHT3	-	-	0.840336	108349	MOUSE	Integrator complex subunit 5
[692]		Q3UVL4	-	-	0.591716	86188.2	MOUSE	Vacuolar protein sorting-associated protein 51 homolog
[693]		P12382	-	-	1.1919	85360.6	MOUSE	ATP-dependent 6-phosphofructokinase, liver type
[694]		Q8K1E0	-	0.935094	-	39713.8	MOUSE	Syntaxin-5
[695]		Q9CX53	-	-	-	18750.4	MOUSE	Gem-associated protein 6
[696]		Q61548	-	-	15.3374	91852.2	MOUSE	Clathrin coat assembly protein AP180
[697]		Q8C1Y8	-	-	0.558659	55505.2	MOUSE	Vacuolar fusion protein CCZ1 homolog
[698]		Q9CZ82	-	-	0.775194	23644.8	MOUSE	Mediator of RNA polymerase II transcription subunit 18
[699]		O88834	-	-	0.934579	38481.7	MOUSE	SH2 domain-containing adapter protein D
[700]		P99026	0.95	-	-	29116.4	MOUSE	Proteasome subunit beta type-4
[701]		Q9R0M6	1.34752	0.615942	-	22909.9	MOUSE	Ras-related protein Rab-9A
[702]		P08775	-	-	0.934579	217178	MOUSE	DNA-directed RNA polymerase II subunit RPB1
[703]		Q8JZX4	0.92233	-	0.813008	45304.2	MOUSE	Splicing factor 45
[704]		Q9D071	-	-	0.680272	113090	MOUSE	MMS19 nucleotide excision repair protein homolog
[705]		P26443	1.85547	-	1.32802	61337.3	MOUSE	Glutamate dehydrogenase 1, mitochondrial
[706]		P15331	1.05791	0.0615942	1	54268	MOUSE	Peripherin
[707]		Q8BKH7	-	-	0.591716	59009.2	MOUSE	Target of rapamycin complex 2 subunit MAPKAP1
[708]		Q8CDN6	-	1.70683	0.840336	32237.6	MOUSE	Thioredoxin-like protein 1
[709]		P51863	1.84825	-	-	40301.4	MOUSE	V-type proton ATPase subunit d 1
[710]		Q9ES97	-	-	0.306748	103880	MOUSE	Reticulon-3
[711]		Q9WVM1	1.52488	-	0.574713	70159.1	MOUSE	Rac GTPase-activating protein 1
[712]		P97314	-	-	-	20926	MOUSE	Cysteine and glycine-rich protein 2
[713]		Q6PA06	-	-	0.421941	66224.7	MOUSE	Atlastin-2
[714]		P13864	-	-	0.763359	183190	MOUSE	DNA (cytosine-5)-methyltransferase 1
[715]		O08740	-	-	1.11359	13251.4	MOUSE	DNA-directed RNA polymerase II subunit RPB11
[716]		Q8BH15	2.27273	0.745614	-	81818.9	MOUSE	CCR4-NOT transcription complex subunit 10
[717]		P11352	0.659722	-	-	22329.5	MOUSE	Glutathione peroxidase 1
[718]		Q9R0U0	1.35908	-	-	31300.8	MOUSE	Serine/arginine-rich splicing factor 10
[719]		Q8CJG0	-	-	0.729927	97305.1	MOUSE	Protein argonaute-2
[720]		Q9Z1Z2	0.940594	-	1.00503	38442.6	MOUSE	Serine-threonine kinase receptor-associated protein
[721]		P62876	1.10723	0.957207	0.769231	7645.2	MOUSE	DNA-directed RNA polymerases I, II, and III subunit RPABC5
[722]		Q6P542	-	-	0.595238	94946.2	MOUSE	ATP-binding cassette sub-family F member 1
[723]		Q9CQJ4	-	1.55963	-	37623.6	MOUSE	E3 ubiquitin-protein ligase RING2
[724]		B2RRE7	-	-	0.869565	123056	MOUSE	OTU domain-containing protein 4
[725]		Q9JIF7	-	-	0.621118	107067	MOUSE	Coatomer subunit beta
[726]		P23198	-	-	0.8	20855.6	MOUSE	Chromobox protein homolog 3
[727]		P52912	-	-	0.740741	42800.3	MOUSE	Nucleolysin TIA-1
[728]		A8C756	-	0.90812	-	217291	MOUSE	Thyroid adenoma-associated protein homolog
[729]		Q8C547	-	17.1717	-	224322	MOUSE	HEAT repeat-containing protein 5B
[730]		Q8C156	-	-	0.847458	82303.3	MOUSE	Condensin complex subunit 2
[731]		Q8C4Y3	1.31579	1.31783	-	65636.9	MOUSE	Negative elongation factor B
[732]		P08249	-	-	1.41844	35611.8	MOUSE	Malate dehydrogenase, mitochondrial
[733]		Q8BMI4	0.0904762	-	-	101780	MOUSE	Flap endonuclease GEN homolog 1
[734]		Q8CFE4	1.20558	-	-	103318	MOUSE	SCY1-like protein 2
[735]		Q9D818	-	-	0.819672	42780.1	MOUSE	Suppressor APC domain-containing protein 2
[736]		Q9WTP6	-	-	1.36054	26469	MOUSE	Adenylate kinase 2, mitochondrial
[737]		Q9D8X2	0.967413	-	-	25346	MOUSE	Coiled-coil domain-containing protein 124
[738]		P59235	1.03373	-	0.719424	41990	MOUSE	Nucleoporin Nup43
[739]		Q6NZB0	-	-	1.32626	29812.8	MOUSE	DnaJ homolog subfamily C member 8
[740]		Q3UL36	1.44158	-	-	32887.2	MOUSE	Arginine and glutamate-rich protein 1
[741]		Q921G8	1.86275	-	0.769231	103224	MOUSE	Gamma-tubulin complex component 2
[742]		Q3UZ45	7.48031	-	3.0303	41148.3	MOUSE	Multicilin
[743]		Q8BWG4	-	-	9.52381	129088	MOUSE	Uncharacterized protein KIAA1755 homolog
[744]		P07742	-	0.634328	-	90211.1	MOUSE	Ribonucleoside-diphosphate reductase large subunit
[745]		Q3UJD6	-	1.41431	0.884956	150550	MOUSE	Ubiquitin carboxyl-terminal hydrolase 19
[746]		Q64345	0.811966	-	-	47223.2	MOUSE	Interferon-induced protein with tetratricopeptide repeats 3
[747]		Q8BW94	-	-	0.0515464	467781	MOUSE	Dynein axonemal heavy chain 3
[748]		P20263	1.31944	1.25	1.38889	38216.8	MOUSE	POU domain, class 5, transcription factor 1
[749]		Q9R0X0	0.0748031	-	-	23192	MOUSE	Mediator of RNA polymerase II transcription subunit 20
[750]		P63242	-	-	1.68919	16832.4	MOUSE	Eukaryotic translation initiation factor 5A-1
[751]		Q61210	1.4158	-	-	102805	MOUSE	Rho guanine nucleotide exchange factor 1
[752]		P42669	-	-	0.704225	34884	MOUSE	Transcriptional activator protein Pur-alpha
[753]		Q7TQK1	1.01279	-	1.04275	106862	MOUSE	Integrator complex subunit 7
[754]		Q9JK48	-	-	0.549451	40855.7	MOUSE	Endophilin-B1
[755]		Q8C0C7	1.02041	0.997653	0.909091	57599.4	MOUSE	Phenylalanine--tRNA ligase alpha subunit
[756]		Q8VEH3	-	-	1.36054	21390.1	MOUSE	ADP-ribosylation factor-like protein 8A
[757]		Q6P2B1	-	-	0.892857	104171	MOUSE	Transportin-3
[758]		P39053	-	-	0.854701	97803.6	MOUSE	Dynamin-1
[759]		Q61749	-	-	0.884956	57624.7	MOUSE	Translation initiation factor eIF-2B subunit delta
[760]		Q9DAM7	0.286145	-	-	11549.3	MOUSE	Transmembrane protein 263
[761]		P0CG14	1.22423	-	-	52244.9	MOUSE	Decreased expression in renal and prostate cancer protein
[762]		Q8VEH5	0.698529	-	-	70096.8	MOUSE	EPM2A-interacting protein 1
[763]		Q8BWM0	-	0.990676	-	43324.2	MOUSE	Prostaglandin E synthase 2
[764]		P22892	-	-	5.46448	91351.3	MOUSE	AP-1 complex subunit gamma-1
[765]		P16460	1.67254	-	-	46584.9	MOUSE	Argininosuccinate synthase
[766]		P17918	-	0.986079	-	28785.1	MOUSE	Proliferating cell nuclear antigen
[767]		Q9D0D3	-	-	-	65229.9	MOUSE	Poly(A) RNA polymerase, mitochondrial
[768]		P46467	-	-	0.316456	49419.7	MOUSE	Vacuolar protein sorting-associated protein 4B
[769]		Q8R1Q8	-	-	0.909091	56614.7	MOUSE	Cytoplasmic dynein 1 light intermediate chain 1
[770]		Q7SIG6	0.0152733	0.0104294	-	106806	MOUSE	Arf-GAP with SH3 domain, ANK repeat and PH domain-containing protein 2
[771]		Q80YS9	-	12.9376	14.4509	74843.8	MOUSE	Serine/threonine kinase-like domain-containing protein STKLD1
[772]		Q7TMY8	-	1.56827	-	482639	MOUSE	E3 ubiquitin-protein ligase HUWE1
[773]		P97801	-	-	0.714286	31254.4	MOUSE	Survival motor neuron protein
[774]		Q62376	1.12293	-	0.869565	51992.5	MOUSE	U1 small nuclear ribonucleoprotein 70 kDa
[775]		Q91YP3	-	1.00354	-	34975.7	MOUSE	Deoxyribose-phosphate aldolase
[776]		P52651	0.487179	-	1.05374	23045.6	MOUSE	Homeobox protein Rhox5
[777]		Q8CBY8	-	9.30997	-	53057.4	MOUSE	Dynactin subunit 4
[778]		Q9Z280	-	0.0555556	-	123970	MOUSE	Phospholipase D1
[779]		Q8K0Y2	-	-	0.515464	46137.5	MOUSE	Keratin, type I cuticular Ha3-I
[780]		Q8BMA6	-	-	0.429185	70574.8	MOUSE	Signal recognition particle subunit SRP68
[781]		Q9JJ78	-	-	25.641	36745.1	MOUSE	Lymphokine-activated killer T-cell-originated protein kinase
[782]		Q9DBF7	-	0.0984936	-	48811.8	MOUSE	Pre-mRNA-splicing factor CWC25 homolog
[783]		O08638	-	-	5.2356	227030	MOUSE	Myosin-11
[784]		P97823	-	-	1.35318	24687.9	MOUSE	Acyl-protein thioesterase 1
[785]		Q0VEE6	95	-	100	74813.9	MOUSE	Zinc finger protein 800
[786]		Q8C3P7	0.0527778	-	-	64616.7	MOUSE	N6-adenosine-methyltransferase subunit METTL3
[787]		Q9CWX9	-	4.59459	-	50639.1	MOUSE	Probable ATP-dependent RNA helicase DDX47
[788]		P35285	-	-	1.23916	21802.1	MOUSE	Ras-related protein Rab-22A
[789]		Q8K2Y0	-	-	1.30719	79958.9	MOUSE	ORC ubiquitin ligase 1
[790]		Q3UK37	-	-	-	46796.9	MOUSE	Tubulin epsilon and delta complex protein 1

## Sheet: co-chaperone SILAC ratio
UniProt	2016 epi components		SILAC_1	SILAC_2	SILAC_3	SILAC		SILAC	SILAC
entry ID		ESC PU/GM	H/L	H/L	H/L	avg		avg	avg	log2 avg
P30416	FKBP4	yes	1.57025	1.28012	1.65563	1.502		1.502	1.502	0.586884
P24369	PPIB	yes	no	1.2574	1.5873	1.42235		1.42235	1.42235	0.508276
Q8BK64	AHSA1	yes	1.48437	1.33229	1.40845	1.40837		1.40837	1.40837	0.494028
Q9CXW3	CYPB	yes	1.51757	1.30368	1.36799	1.39641		1.39641	1.39641	0.481727
Q9CYG7	TOM34	yes	1.3324	1.13485	1.23916	1.23547		1.23547	1.23547	0.305057
Q9QYJ3	DNJB1	no	1.34371	1.23367	1.09769	1.22502		1.22502	1.22502	0.29281
Q6GQV7	EDRF1	no	no	1.32193	1	1.16096		1.16096	1.16096	0.215324
Q9QYI3	DNJC7	yes	1.23859	1.03281	1.19904	1.15681		1.15681	1.15681	0.210156
Q61081	CDC37	yes	1.16708	1.09819	1.1534	1.13956		1.13956	1.13956	0.188473
Q8R3H9	TTC4	yes	0.95	1.43581	0.990099	1.1253		1.1253	1.1253	0.170314
Q9QYJ0	DNJA2	yes	1.06264	1.13485	1.07411	1.09053		1.09053	1.09053	0.125034
P63037	DNJA1	yes	1.10723	1.0665	1.05597	1.07656		1.07656	1.07656	0.106434
Q9CZP7	CD37L	yes	1.08696	1.05198	1.08108	1.07334		1.07334	1.07334	0.102106
Q99KD5	UN45A	no	0.952859	0.977011	1.20337	1.04441		1.04441	1.04441	0.0626926
O54946	DNJB6	yes	1.09447	1.09395	0.934579	1.041		1.041	1.041	0.0579703
Q9D868	PPIH	no	0.993724	1.01311	1.10742	1.03808		1.03808	1.03808	0.0539243
O35685	NUDC	yes	0.963489	1.04294	0.970874	0.992436		0.992436	0.992436	-0.0109543
Q8R1N4	NUDC3	yes	no	1	0.970874	0.985437		0.985437	0.985437	-0.0211646
Q60864	STIP1	yes	0.931373	0.923913	0.892857	0.916048		0.916048	0.916048	-0.126506
Q9D706	RPAP3	no	0.88785	0.888192	0.840336	0.872126		0.872126	0.872126	-0.197391
P63017	HSP7C	yes	0.826087	0.85	0.833333	0.836473		0.836473	0.836473	-0.257608
Q61699	HS105	no	0.863636	0.752212	0.869565	0.828471		0.828471	0.828471	-0.271476
Q9CX34	SGT1	yes	0.848214	0.860324	0.769231	0.825923		0.825923	0.825923	-0.275921
Q9CQJ2	PIHD1	yes	0.818966	0.833333	0.78125	0.811183		0.811183	0.811183	-0.301901
O70591	PFD2	no	0.826087	0.787037	0.714286	0.775803		0.775803	0.775803	-0.366237
Q61316	HSP74	yes	0.76	0.758929	0.775194	0.764707		0.764707	0.764707	-0.38702
Q8BJU0	SGTA	yes	0.683453	no	no	0.683453		0.683453	0.683453	-0.549085	?

## Sheet: MS Sample Log
Project	Set #	Run #	Sample #
SILAC Heavy EE & Light AA February 2022	Set 1	O22022105	10
		O22022106	9
		O22022107	8
		O22022108	7
		O22022109	6
		O22022110	5
		O22022111	4
		O22022112	3
		O22022202	2
		O22022203	1
	Set 2	O22021804	10
		O22021805	9
		O22021806	8
		O22021807	7
		O22022003	6
		O22022004	5
		O22022005	4
		O22022006	3
		O22022008	1
		O22022103	2
	Set 3	O22022208	10
		O22022209	9
		O22022303	8
		O22022304	7
		O22022305	6
		O22022306	5
		O22022307	4
		O22022308	3
		O22022402	2
		O22022403	1
