# Supplementary material for: Phosphorylation-Driven Epichaperome Assembly: A Critical Regulator of Cellular Adaptability and Proliferation
Source: Research Square preprint supplement (doi:10.21203/rs.3.rs-4114038/v1), 2024-04-03
Supplement: Supplementary file 5 [file e9ed5a6b9aa70bd1920c10b7.xlsx]

## Sheet: ModSearch
Search Name:	UNH Samples/results1 phospho search
	Acc #	Modification	AA	Site	SLIP	Num Unique	% Cov	Best Disc Score	Best Expect Val	m/z	z	ppm	DB Peptide	Variable Mods	Fraction	RT	Spectrum	Score	Expect	# in DB	Protein MW	Species	Protein Name
[1]	P11499	Oxidation	M	93	-	87	72.8	12.94	2.3e-23	683.37	2	1.7	TLTLVDTGIGMTK	Oxidation@11	UNH_Sample_B1	37.003	1	54.7	2.6e-13	2	83281.9	MOUSE	Heat shock protein HSP 90-beta
[1]	P11499	Oxidation	M	363	-	87	72.8	12.94	2.3e-23	1195.57	2	0.27	VFIMDSCDELIPEYLNFIR	Oxidation@4	UNH_Sample_B1	60.346	1	52.7	1.1e-15	1	83281.9	MOUSE	Heat shock protein HSP 90-beta
[1]	P11499	Oxidation	M	466	-	87	72.8	12.94	2.3e-23	731.653	3	1.4	YHTSQSGDEMTSLSEYVSR	Oxidation@10	UNH_Sample_B1	31.149	1	48	1e-15	1	83281.9	MOUSE	Heat shock protein HSP 90-beta
[1]	P11499	Oxidation	M	513	-	87	72.8	12.94	2.3e-23	1232.58	2	0.83	GFEVVYMTEPIDEYCVQQLK	Oxidation@7	UNH_Sample_B1	45.913	1	51.3	4.5e-15	1	83281.9	MOUSE	Heat shock protein HSP 90-beta
[1]	P11499	Oxidation	M	553	-	87	72.8	12.94	2.3e-23	765.029	3	-0.53	EGLELPEDEEEKKKMEESK	Oxidation@15	UNH_Sample_B1	18.678	1	45.8	8.1e-14	1	83281.9	MOUSE	Heat shock protein HSP 90-beta
[1]	P11499	Oxidation	M	602	-	87	72.8	12.94	2.3e-23	816.705	3	0.62	LVSSPCCIVTSTYGWTANMER	Oxidation@19	UNH_Sample_B1	41.229	1	56.9	1.6e-16	1	83281.9	MOUSE	Heat shock protein HSP 90-beta
[1]	P11499	Oxidation	M	617	46	87	72.8	12.94	2.3e-23	640.752	2	0.59	DNSTMGYMMAK	Oxidation@5=46;Oxidation@8=9	UNH_Sample_B1	19.695	1	41.5	3.6e-13	1	83281.9	MOUSE	Heat shock protein HSP 90-beta
[1]	P11499	Oxidation	M	620	44	87	72.8	12.94	2.3e-23	640.752	2	0.43	DNSTMGYMMAK	Oxidation@8=44;Oxidation@9=49	UNH_Sample_B1	18.975	1	43.6	1.6e-14	1	83281.9	MOUSE	Heat shock protein HSP 90-beta
[1]	P11499	Oxidation	M	621	49	87	72.8	12.94	2.3e-23	640.752	2	0.43	DNSTMGYMMAK	Oxidation@8=44;Oxidation@9=49	UNH_Sample_B1	18.975	1	43.6	1.6e-14	1	83281.9	MOUSE	Heat shock protein HSP 90-beta
[1]	P11499	Oxidation	M	720	-	87	72.8	12.94	2.3e-23	1385.63	3	4.1	LGLGIDEDEVTAEEPSAAVPDEIPPLEGDEDASRMEEVD	Oxidation@35	UNH_Sample_B1	54.709	1	32.6	1.4e-10	1	83281.9	MOUSE	Heat shock protein HSP 90-beta
[1]	P11499	Phospho	S	226	-	87	72.8	12.94	2.3e-23	815.823	2	1.3	EKEISDDEAEEEK	Phospho@5	UNH_Sample_B1	15.217	1	47.7	9.8e-12	1	83281.9	MOUSE	Heat shock protein HSP 90-beta
[1]	P11499	Phospho	S	255	58	87	72.8	12.94	2.3e-23	606.57	3	0.33	IEDVGSDEEDDSGKDK	Phospho@6=58	UNH_Sample_B1	18.409	1	58	3.6e-22	1	83281.9	MOUSE	Heat shock protein HSP 90-beta
[1-1]	P07901	Oxidation	M	98	-	49	55.3	12.94	2.3e-23	683.37	2	1.7	TLTIVDTGIGMTK	Oxidation@11	UNH_Sample_B1	37.003	1	54.7	2.6e-13	2	84788.6	MOUSE	Heat shock protein HSP 90-alpha
[1-1]	P07901	Oxidation	M	372	-	49	55.3	12.94	2.3e-23	811.06	3	-0.36	VFIMDNCEELIPEYLNFIR	Oxidation@4	UNH_Sample_B1	52.193	1	31.8	3e-07	1	84788.6	MOUSE	Heat shock protein HSP 90-alpha
[1-1]	P07901	Oxidation	M	611	-	49	55.3	12.94	2.3e-23	821.378	3	1.6	LVTSPCCIVTSTYGWTANMER	Oxidation@19	UNH_Sample_B1	43.136	1	38.3	3.4e-15	1	84788.6	MOUSE	Heat shock protein HSP 90-alpha
[1-1]	P07901	Oxidation	M	626	20	49	55.3	12.94	2.3e-23	602.752	2	0.2	DNSTMGYMAAK	Oxidation@5=20	UNH_Sample_B1	19.947	1	28.1	2.4e-09	1	84788.6	MOUSE	Heat shock protein HSP 90-alpha
[1-1]	P07901	Oxidation	M	717	-	49	55.3	12.94	2.3e-23	1197.86	3	-0.14	LGLGIDEDDPTVDDTSAAVTEEMPPLEGDDDTSR	Oxidation@23	UNH_Sample_B1	48.381	2	58.8	1.3e-14	1	84788.6	MOUSE	Heat shock protein HSP 90-alpha
[1-2]	P08113	Oxidation	M	622	-	27	35.3	7.53	2.4e-13	661.827	2	1	EFEPLLNWMK	Oxidation@9	UNH_Sample_B1	45.01	1	31.5	7.9e-09	1	92476.5	MOUSE	Endoplasmin
[2]	Q8VDD5	Gln->pyro-Glu	Q	210	-	88	43.1	9.12	2.8e-16	570.646	3	0.79	QLLQANPILEAFGNAK	Gln->pyro-Glu@1	UNH_Sample_B1	66.295	1	41.6	7.8e-12	1	226374	MOUSE	Myosin-9
[2]	Q8VDD5	Gln->pyro-Glu	Q	719	-	88	43.1	9.12	2.8e-16	771.42	2	0.72	QRYEILTPNSIPK	Gln->pyro-Glu@1	UNH_Sample_B1	37.813	1	29.6	1e-05	1	226374	MOUSE	Myosin-9
[2]	Q8VDD5	Gln->pyro-Glu	Q	738	-	88	43.1	9.12	2.8e-16	473.248	2	0.11	QACVLMIK	Gln->pyro-Glu@1	UNH_Sample_B1	43.948	1	34.3	3.8e-10	1	226374	MOUSE	Myosin-9
[2]	Q8VDD5	Gln->pyro-Glu	Q	803	-	88	43.1	9.12	2.8e-16	465.739	2	0.21	QQQLTAMK	Gln->pyro-Glu@1	UNH_Sample_B1	29.691	1	23.6	1.7e-06	1	226374	MOUSE	Myosin-9
[2]	Q8VDD5	Gln->pyro-Glu	Q	1042	-	88	43.1	9.12	2.8e-16	457.241	2	2.1	QRQELEK	Gln->pyro-Glu@1	UNH_Sample_B1	13.169	1	21.1	8e-05	1	226374	MOUSE	Myosin-9
[2]	Q8VDD5	Gln->pyro-Glu	Q	1358	-	88	43.1	9.12	2.8e-16	719.872	2	0.45	QIATLHAQVTDMK	Gln->pyro-Glu@1	UNH_Sample_B1	35.38	1	36	6.7e-10	1	226374	MOUSE	Myosin-9
[2]	Q8VDD5	Gln->pyro-Glu	Q	1878	-	88	43.1	9.12	2.8e-16	657.795	2	1.6	QLEEAEEEAQR	Gln->pyro-Glu@1	UNH_Sample_B1	34.87	1	39.1	1.4e-09	1	226374	MOUSE	Myosin-9
[2]	Q8VDD5	Met-loss+Acetyl	M	1	-	88	43.1	9.12	2.8e-16	777.894	2	-0.081	MAQQAADKYLYVDK	Met-loss+Acetyl@1	UNH_Sample_B1	34.629	1	47.6	2.2e-11	1	226374	MOUSE	Myosin-9
[2]	Q8VDD5	Oxidation	M	86	-	88	43.1	9.12	2.8e-16	768.04	3	0.43	VEDMAELTCLNEASVLHNLK	Oxidation@4	UNH_Sample_B1	39.035	1	30.9	3.5e-09	2	226374	MOUSE	Myosin-9
[2]	Q8VDD5	Oxidation	M	137	-	88	43.1	9.12	2.8e-16	872.43	2	0.89	NLPIYSEEIVEMYK	Oxidation@12	UNH_Sample_B1	42.377	1	58.9	4.6e-13	1	226374	MOUSE	Myosin-9
[2]	Q8VDD5	Oxidation	M	329	67	88	43.1	9.12	2.8e-16	809.402	2	-0.1	IMGIPEDEQMGLLR	Oxidation@2=67	UNH_Sample_B1	40.124	1	40.2	2.9e-08	1	226374	MOUSE	Myosin-9
[2]	Q8VDD5	Oxidation	M	337	45	88	43.1	9.12	2.8e-16	809.402	2	-0.23	IMGIPEDEQMGLLR	Oxidation@10=45	UNH_Sample_B1	40.694	1	20.1	1.3e-05	1	226374	MOUSE	Myosin-9
[2]	Q8VDD5	Oxidation	M	365	-	88	43.1	9.12	2.8e-16	804.353	2	1.5	NTDQASMPDNTAAQK	Oxidation@7	UNH_Sample_B1	11.872	1	41.6	6.3e-14	1	226374	MOUSE	Myosin-9
[2]	Q8VDD5	Oxidation	M	484	-	88	43.1	9.12	2.8e-16	828.405	3	-0.53	LQQLFNHTMFILEQEEYQR	Oxidation@9	UNH_Sample_B1	40.072	1	29.4	1.6e-09	2	226374	MOUSE	Myosin-9
[2]	Q8VDD5	Oxidation	M	586	-	88	43.1	9.12	2.8e-16	454.713	2	0.76	ADEWLMK	Oxidation@6	UNH_Sample_B1	24.93	1	32.6	2.8e-09	2	226374	MOUSE	Myosin-9
[2]	Q8VDD5	Oxidation	M	589	-	88	43.1	9.12	2.8e-16	714.676	3	0.55	NMDPLNDNIATLLHQSSDK	Oxidation@2	UNH_Sample_B1	40.176	1	55.8	1.2e-12	1	226374	MOUSE	Myosin-9
[2]	Q8VDD5	Oxidation	M	627	-	88	43.1	9.12	2.8e-16	1017.53	2	1.3	IIGLDQVAGMSETALPGAFK	Oxidation@10	UNH_Sample_B1	47.603	1	59.5	1.2e-15	1	226374	MOUSE	Myosin-9
[2]	Q8VDD5	Oxidation	M	941	-	88	43.1	9.12	2.8e-16	783.691	3	2.6	MQQNIQELEEQLEEEESAR	Oxidation@1	UNH_Sample_B1	41.254	1	45.5	1.1e-12	1	226374	MOUSE	Myosin-9
[2]	Q8VDD5	Oxidation	M	1009	-	88	43.1	9.12	2.8e-16	843.383	2	1.2	VAEFTTNLMEEEEK	Oxidation@9	UNH_Sample_B1	31.284	1	53	5.7e-12	1	226374	MOUSE	Myosin-9
[2-1]	Q61879	Gln->pyro-Glu	Q	217	-	46	23.1	9.29	1.3e-16	863.46	2	-2.4	QLLQANPILESFGNAK	Gln->pyro-Glu@1	UNH_Sample_B1	62.103	1	31.9	1.3e-09	1	228998	MOUSE	Myosin-10
[2-1]	Q61879	Gln->pyro-Glu	Q	726	-	46	23.1	9.29	1.3e-16	763.423	2	0.41	QRYEILTPNAIPK	Gln->pyro-Glu@1	UNH_Sample_B1	38.662	1	16.9	0.00016	1	228998	MOUSE	Myosin-10
[2-1]	Q61879	Gln->pyro-Glu	Q	850	-	46	23.1	9.29	1.3e-16	479.23	2	1.2	QEEELQAK	Gln->pyro-Glu@1	UNH_Sample_B1	24.894	1	22.8	2.3e-06	1	228998	MOUSE	Myosin-10
[2-1]	Q61879	Oxidation	M	90	-	46	23.1	9.29	1.3e-16	768.04	3	0.43	VEDMAELTCLNEASVLHNLK	Oxidation@4	UNH_Sample_B1	39.035	1	30.9	3.5e-09	2	228998	MOUSE	Myosin-10
[2-1]	Q61879	Oxidation	M	141	-	46	23.1	9.29	1.3e-16	885.941	2	1.1	NLPIYSENIIEMYR	Oxidation@12	UNH_Sample_B1	44.03	1	27.1	3.2e-08	1	228998	MOUSE	Myosin-10
[2-1]	Q61879	Oxidation	M	491	-	46	23.1	9.29	1.3e-16	828.405	3	-0.53	LQQLFNHTMFILEQEEYQR	Oxidation@9	UNH_Sample_B1	40.072	1	29.4	1.6e-09	2	228998	MOUSE	Myosin-10
[2-1]	Q61879	Oxidation	M	593	-	46	23.1	9.29	1.3e-16	454.713	2	0.76	ADEWLMK	Oxidation@6	UNH_Sample_B1	24.93	1	32.6	2.8e-09	2	228998	MOUSE	Myosin-10
[2-1]	Q61879	Oxidation	M	596	-	46	23.1	9.29	1.3e-16	719.341	3	1.8	NMDPLNDNVATLLHQSSDR	Oxidation@2	UNH_Sample_B1	37.788	1	15.1	4.3e-05	1	228998	MOUSE	Myosin-10
[2-1]	Q61879	Oxidation	M	634	-	46	23.1	9.29	1.3e-16	1052.52	2	2.9	IVGLDQVTGMTETAFGSAYK	Oxidation@10	UNH_Sample_B1	44.015	1	32.1	1.9e-08	1	228998	MOUSE	Myosin-10
[2-1]	Q61879	Oxidation	M	1856	-	46	23.1	9.29	1.3e-16	776.878	2	-12	LKEIFMQVEDER	Oxidation@6	UNH_Sample_B1	22.462	1	27.4	9.2e-05	1	228998	MOUSE	Myosin-10
[3]	Q9QXS1	Gln->pyro-Glu	Q	361	-	93	20.9	7.58	2e-13	909.438	2	0.93	QTNLENLDQAFSVAER	Gln->pyro-Glu@1	UNH_Sample_B1	53.845	1	52	2.5e-11	1	534192	MOUSE	Plectin
[3]	Q9QXS1	Gln->pyro-Glu	Q	1844	-	93	20.9	7.58	2e-13	542.773	2	0.7	QLAEGTAQQR	Gln->pyro-Glu@1	UNH_Sample_B1	24.648	1	28.7	9.5e-08	1	534192	MOUSE	Plectin
[3]	Q9QXS1	Gln->pyro-Glu	Q	1875	-	93	20.9	7.58	2e-13	542.288	2	0.42	QLLEEELAR	Gln->pyro-Glu@1	UNH_Sample_B1	46.836	1	42.4	1.4e-07	1	534192	MOUSE	Plectin
[3]	Q9QXS1	Gln->pyro-Glu	Q	1963	-	93	20.9	7.58	2e-13	493.233	2	0.82	QLAEEDAAR	Gln->pyro-Glu@1	UNH_Sample_B1	27.968	1	33.3	2.4e-08	1	534192	MOUSE	Plectin
[3]	Q9QXS1	Gln->pyro-Glu	Q	2067	-	93	20.9	7.58	2e-13	586.797	2	-0.37	QVEEEIMALK	Gln->pyro-Glu@1	UNH_Sample_B1	48.943	1	39.8	9.4e-10	1	534192	MOUSE	Plectin
[3]	Q9QXS1	Gln->pyro-Glu	Q	2119	-	93	20.9	7.58	2e-13	528.751	2	0.09	QLAAEEEQR	Gln->pyro-Glu@1	UNH_Sample_B1	26.823	1	40.8	2.2e-09	1	534192	MOUSE	Plectin
[3]	Q9QXS1	Gln->pyro-Glu	Q	2180	-	93	20.9	7.58	2e-13	605.825	2	0.24	QLQLAQEAAQK	Gln->pyro-Glu@1	UNH_Sample_B1	38.885	1	37.4	1.3e-10	1	534192	MOUSE	Plectin
[3]	Q9QXS1	Gln->pyro-Glu	Q	2420	-	93	20.9	7.58	2e-13	428.712	2	0.7	QVAEEAAR	Gln->pyro-Glu@1	UNH_Sample_B1	21.662	1	18.3	1.9e-05	1	534192	MOUSE	Plectin
[3]	Q9QXS1	Gln->pyro-Glu	Q	2440	-	93	20.9	7.58	2e-13	642.316	2	1.3	QLAEEDLAQQR	Gln->pyro-Glu@1	UNH_Sample_B1	36.732	1	39.5	8e-11	1	534192	MOUSE	Plectin
[3]	Q9QXS1	Gln->pyro-Glu	Q	2691	-	93	20.9	7.58	2e-13	639.278	2	-0.41	QELMASMEEAR	Gln->pyro-Glu@1	UNH_Sample_B1	42.833	1	15.7	6.1e-06	1	534192	MOUSE	Plectin
[3]	Q9QXS1	Gln->pyro-Glu	Q	3846	-	93	20.9	7.58	2e-13	581.33	2	0.62	QTLTIYQALK	Gln->pyro-Glu@1	UNH_Sample_B1	49.179	1	27.1	1.6e-08	1	534192	MOUSE	Plectin
[3]	Q9QXS1	Gln->pyro-Glu	Q	4035	-	93	20.9	7.58	2e-13	535.298	2	0.86	QITVEELVR	Gln->pyro-Glu@1	UNH_Sample_B1	49.775	1	16.9	6.7e-07	1	534192	MOUSE	Plectin
[3]	Q9QXS1	Phospho	Y	257	-	93	20.9	7.58	2e-13	763.397	2	6	LQNVQIALDYLR	Phospho@10	UNH_Sample_B1	56.767	1	15.8	0.0028	1	534192	MOUSE	Plectin
[3]	Q9QXS1	Phospho	T	1215	31	93	20.9	7.58	2e-13	535.255	2	-14	SELELTLGK	Phospho@6=31	UNH_Sample_B1	45.142	1	15.7	0.00015	1	534192	MOUSE	Plectin
[4]	P57780	Gln->pyro-Glu	Q	439	-	62	64.1	10.33	1.6e-18	761.874	2	1	QRDYETATLSDIK	Gln->pyro-Glu@1	UNH_Sample_B1	33.088	1	39.1	8.9e-08	1	104978	MOUSE	Alpha-actinin-4
[4]	P57780	Gln->pyro-Glu	Q	523	-	62	64.1	10.33	1.6e-18	842.433	2	0.29	QLETIDQLHLEYAK	Gln->pyro-Glu@1	UNH_Sample_B1	46.442	1	63.5	2.6e-11	1	104978	MOUSE	Alpha-actinin-4
[4]	P57780	Gln->pyro-Glu	Q	654	-	62	64.1	10.33	1.6e-18	902.939	2	0.8	QFASQANMVGPWIQTK	Gln->pyro-Glu@1;Oxidation@8	UNH_Sample_B1	48.243	1	50.4	5.6e-14	1	104978	MOUSE	Alpha-actinin-4
[4]	P57780	Gln->pyro-Glu	Q	807	-	62	64.1	10.33	1.6e-18	460.199	2	0.53	QGDAEFNR	Gln->pyro-Glu@1	UNH_Sample_B1	25.136	1	26.6	1e-06	1	104978	MOUSE	Alpha-actinin-4
[4]	P57780	Oxidation	M	241	-	62	64.1	10.33	1.6e-18	611.629	3	1.3	MLDAEDIVNTARPDEK	Oxidation@1	UNH_Sample_B1	32.514	1	52.5	2.8e-12	1	104978	MOUSE	Alpha-actinin-4
[4]	P57780	Oxidation	M	259	-	62	64.1	10.33	1.6e-18	675.324	3	-0.24	AIMTYVSSFYHAFSGAQK	Oxidation@3	UNH_Sample_B1	40.964	1	36.5	8.9e-10	2	104978	MOUSE	Alpha-actinin-4
[4]	P57780	Oxidation	M	374	-	62	64.1	10.33	1.6e-18	493.246	3	0.83	LSNRPAFMPSEGR	Oxidation@8	UNH_Sample_B1	18.321	1	38.4	7.9e-09	2	104978	MOUSE	Alpha-actinin-4
[4]	P57780	Oxidation	M	380	-	62	64.1	10.33	1.6e-18	672.316	3	1.6	MVSDINNGWQHLEQAEK	Oxidation@1	UNH_Sample_B1	30.901	1	41	3e-12	1	104978	MOUSE	Alpha-actinin-4
[4]	P57780	Oxidation	M	661	-	62	64.1	10.33	1.6e-18	902.939	2	0.8	QFASQANMVGPWIQTK	Gln->pyro-Glu@1;Oxidation@8	UNH_Sample_B1	48.243	1	50.4	5.6e-14	1	104978	MOUSE	Alpha-actinin-4
[4]	P57780	Oxidation	M	680	-	62	64.1	10.33	1.6e-18	648.664	3	1.2	ISIEMNGTLEDQLSHLK	Oxidation@5	UNH_Sample_B1	37.683	1	63.4	7.1e-12	1	104978	MOUSE	Alpha-actinin-4
[4]	P57780	Oxidation	M	730	-	62	64.1	10.33	1.6e-18	439.872	3	0.53	HTNYTMEHIR	Oxidation@6	UNH_Sample_B1	10.902	1	25.1	9.4e-10	1	104978	MOUSE	Alpha-actinin-4
[4]	P57780	Oxidation	M	768	-	62	64.1	10.33	1.6e-18	684.815	2	1.2	GISQEQMQEFR	Oxidation@7	UNH_Sample_B1	20.844	1	46.8	8.2e-10	1	104978	MOUSE	Alpha-actinin-4
[4]	P57780	Oxidation	M	884	-	62	64.1	10.33	1.6e-18	890.915	2	1.2	MAPYQGPDAAPGALDYK	Oxidation@1	UNH_Sample_B1	32.362	1	57.4	3e-13	1	104978	MOUSE	Alpha-actinin-4
[4-1]	Q7TPR4	Gln->pyro-Glu	Q	419	-	47	55.2	9.49	5.7e-17	754.879	2	1.2	QKDYETATLSEIK	Gln->pyro-Glu@1	UNH_Sample_B1	33.447	1	48.6	2e-12	1	103069	MOUSE	Alpha-actinin-1
[4-1]	Q7TPR4	Gln->pyro-Glu	Q	634	-	47	55.2	9.49	5.7e-17	870.958	2	1.5	QFGAQANVIGPWIQTK	Gln->pyro-Glu@1	UNH_Sample_B1	57.465	1	56.3	1.3e-13	1	103069	MOUSE	Alpha-actinin-1
[4-1]	Q7TPR4	Oxidation	M	221	-	47	55.2	9.49	5.7e-17	592.622	3	1.6	MLDAEDIVGTARPDEK	Oxidation@1	UNH_Sample_B1	31.722	1	47.4	1.3e-10	1	103069	MOUSE	Alpha-actinin-1
[4-1]	Q7TPR4	Oxidation	M	239	-	47	55.2	9.49	5.7e-17	675.324	3	-0.24	AIMTYVSSFYHAFSGAQK	Oxidation@3	UNH_Sample_B1	40.964	1	36.5	8.9e-10	2	103069	MOUSE	Alpha-actinin-1
[4-1]	Q7TPR4	Oxidation	M	309	8	47	55.2	9.49	5.7e-17	477.224	3	0.42	VPENTMHAMQQK	Oxidation@9=8	UNH_Sample_B1	11.391	1	25.1	8e-07	1	103069	MOUSE	Alpha-actinin-1
[4-1]	Q7TPR4	Oxidation	M	354	-	47	55.2	9.49	5.7e-17	493.246	3	0.83	LSNRPAFMPSEGR	Oxidation@8	UNH_Sample_B1	18.321	1	38.4	7.9e-09	2	103069	MOUSE	Alpha-actinin-1
[4-1]	Q7TPR4	Oxidation	M	710	-	47	55.2	9.49	5.7e-17	444.203	3	-0.71	HTNYNMEHIR	Oxidation@6	UNH_Sample_B1	11.058	1	18.4	1.2e-07	1	103069	MOUSE	Alpha-actinin-1
[4-1]	Q7TPR4	Oxidation	M	830	-	47	55.2	9.49	5.7e-17	873.381	2	0.85	ETADTDTADQVMASFK	Oxidation@12	UNH_Sample_B1	30.527	1	37.1	4e-12	1	103069	MOUSE	Alpha-actinin-1
[5]	Q80X90	Gln->pyro-Glu	Q	2567	-	63	31.8	8.61	2.4e-15	612.817	2	1.2	QQYNVTYVVK	Gln->pyro-Glu@1	UNH_Sample_B1	38.57	1	33.4	2.8e-11	1	277827	MOUSE	Filamin-B
[5]	Q80X90	Oxidation	M	549	-	63	31.8	8.61	2.4e-15	810.391	2	0.33	SPFEVQVGPEAGMQK	Oxidation@13	UNH_Sample_B1	32.996	1	46.9	6.1e-13	1	277827	MOUSE	Filamin-B
[5]	Q80X90	Oxidation	M	1766	-	63	31.8	8.61	2.4e-15	486.586	3	1	KGEITGTVHMPSGK	Oxidation@10	UNH_Sample_B1	11.845	1	16.9	5.2e-05	1	277827	MOUSE	Filamin-B
[6]	Q9WTI7	Gln->pyro-Glu	Q	633	-	54	48.7	9.97	7.4e-18	656.854	2	0.54	QPGRFDEVLIR	Gln->pyro-Glu@1	UNH_Sample_B1	39.695	1	42.5	9e-06	1	121945	MOUSE	Unconventional myosin-Ic
[6]	Q9WTI7	Gln->pyro-Glu	Q	939	-	54	48.7	9.97	7.4e-18	839.986	2	0.69	QLLLTPSAVVIVEDAK	Gln->pyro-Glu@1	UNH_Sample_B1	65.181	1	53.3	8.5e-13	1	121945	MOUSE	Unconventional myosin-Ic
[6]	Q9WTI7	Gln->pyro-Glu	Q	988	-	54	48.7	9.97	7.4e-18	665.025	3	-0.1	QKGDVVLQSDHVIETLTK	Gln->pyro-Glu@1	UNH_Sample_B1	38.208	1	44	1.1e-12	1	121945	MOUSE	Unconventional myosin-Ic
[6]	Q9WTI7	Met-loss+Acetyl	M	1	-	54	48.7	9.97	7.4e-18	797.465	2	0.43	MALQVELIPTGEIIR	Met-loss+Acetyl@1	UNH_Sample_B1	61.905	1	50.1	5.6e-11	1	121945	MOUSE	Unconventional myosin-Ic
[6]	Q9WTI7	Oxidation	M	36	-	54	48.7	9.97	7.4e-18	547.78	2	0.99	VTMESALTAR	Oxidation@3	UNH_Sample_B1	18.327	1	46.6	1.8e-09	1	121945	MOUSE	Unconventional myosin-Ic
[6]	Q9WTI7	Oxidation	M	137	-	54	48.7	9.97	7.4e-18	683.319	2	0.19	DQAVMISGESGAGK	Oxidation@5	UNH_Sample_B1	21.317	1	45.7	1.6e-12	1	121945	MOUSE	Unconventional myosin-Ic
[6]	Q9WTI7	Oxidation	M	202	-	54	48.7	9.97	7.4e-18	604.769	2	1.1	YMDVQFDFK	Oxidation@2	UNH_Sample_B1	35.86	1	24.6	3.2e-08	1	121945	MOUSE	Unconventional myosin-Ic
[6]	Q9WTI7	Oxidation	M	606	-	54	48.7	9.97	7.4e-18	665.892	2	0.03	MSLLQLVEILR	Oxidation@1	UNH_Sample_B1	56.981	1	33.8	1.3e-11	1	121945	MOUSE	Unconventional myosin-Ic
[6]	Q9WTI7	Oxidation	M	685	-	54	48.7	9.97	7.4e-18	881.104	3	-1	SLCPETWPMWAGRPQDGVAVLVR	Oxidation@9	UNH_Sample_B1	45.547	1	16.9	3.2e-06	1	121945	MOUSE	Unconventional myosin-Ic
[7]	Q68FD5	Met-loss+Acetyl	M	1	-	52	34.7	9.33	1.1e-16	426.769	2	0.89	MAQILPIR	Met-loss+Acetyl@1	UNH_Sample_B1	46.352	1	30	3.4e-05	1	191558	MOUSE	Clathrin heavy chain 1
[7]	Q68FD5	Oxidation	M	73	-	52	34.7	9.33	1.1e-16	525.271	3	-1.3	RPISADSAIMNPASK	Oxidation@10	UNH_Sample_B1	20.059	1	30.6	4.5e-07	1	191558	MOUSE	Clathrin heavy chain 1
[7]	Q68FD5	Oxidation	M	95	-	52	34.7	9.33	1.1e-16	626.834	2	0.11	TLQIFNIEMK	Oxidation@9	UNH_Sample_B1	39.68	1	26	1.3e-07	1	191558	MOUSE	Clathrin heavy chain 1
[7]	Q68FD5	Oxidation	M	264	-	52	34.7	9.33	1.1e-16	865.754	3	1.4	AVDVFFPPEAQNDFPVAMQISEK	Oxidation@18	UNH_Sample_B1	51.12	1	29.8	1.6e-09	1	191558	MOUSE	Clathrin heavy chain 1
[7]	Q68FD5	Oxidation	M	1138	-	52	34.7	9.33	1.1e-16	909.413	3	0.34	ADDPSSYMEVVQAANASGNWEELVK	Oxidation@8	UNH_Sample_B1	49.945	1	53.5	5.8e-15	1	191558	MOUSE	Clathrin heavy chain 1
[8]	Q9ERG0	Gln->pyro-Glu	Q	10	-	47	47.3	9.7	2.4e-17	487.259	2	-0.034	QWTSLSLR	Gln->pyro-Glu@1	UNH_Sample_B1	47.898	1	28.9	1.5e-06	1	84060.5	MOUSE	LIM domain and actin-binding protein 1
[8]	Q9ERG0	Gln->pyro-Glu	Q	281	-	47	47.3	9.7	2.4e-17	654.31	2	0.56	QSSPASYTNELK	Gln->pyro-Glu@1	UNH_Sample_B1	33.854	1	38.5	1.9e-10	1	84060.5	MOUSE	LIM domain and actin-binding protein 1
[8]	Q9ERG0	Oxidation	M	354	-	47	47.3	9.7	2.4e-17	635.648	3	1.1	SEAQQPMHPKPLSPDAR	Oxidation@7	UNH_Sample_B1	13.804	1	52.5	8.8e-14	1	84060.5	MOUSE	LIM domain and actin-binding protein 1
[8]	Q9ERG0	Oxidation	M	398	-	47	47.3	9.7	2.4e-17	456.218	2	0.43	TVYPMER	Oxidation@5	UNH_Sample_B1	15.116	1	32	7.3e-08	1	84060.5	MOUSE	LIM domain and actin-binding protein 1
[8]	Q9ERG0	Oxidation	M	506	-	47	47.3	9.7	2.4e-17	546.292	2	0.73	VGVLAASMEAK	Oxidation@8	UNH_Sample_B1	21.748	1	46.2	6.3e-11	1	84060.5	MOUSE	LIM domain and actin-binding protein 1
[8]	Q9ERG0	Phospho	S	225	19	47	47.3	9.7	2.4e-17	801.6	4	1.4	RLSENNCSLDDWEIGAGHLSSSAFNSEK	Phospho@3=19	UNH_Sample_B1	40.798	1	45.6	7.7e-14	1	84060.5	MOUSE	LIM domain and actin-binding protein 1
[8]	Q9ERG0	Phospho	S	360	81	47	47.3	9.7	2.4e-17	656.973	3	2.8	SEAQQPMHPKPLSPDAR	Phospho@13=81	UNH_Sample_B1	19.918	1	51.9	1.2e-12	1	84060.5	MOUSE	LIM domain and actin-binding protein 1
[9]	E9Q634	Gln->pyro-Glu	Q	64	-	47	37.4	8.09	2.2e-14	491.721	2	-0.16	QMPYFGEK	Gln->pyro-Glu@1	UNH_Sample_B1	43.568	1	33.4	1.3e-07	1	126819	MOUSE	Unconventional myosin-Ie
[9]	E9Q634	Gln->pyro-Glu	Q	568	-	47	37.4	8.09	2.2e-14	601.808	2	0.48	QANDLVSTLMK	Gln->pyro-Glu@1	UNH_Sample_B1	51.711	1	37.9	4.3e-11	1	126819	MOUSE	Unconventional myosin-Ie
[9]	E9Q634	Gln->pyro-Glu	Q	653	-	47	37.4	8.09	2.2e-14	790.062	3	0.4	QGVLHLLQSVNMDSDQFQLGR	Gln->pyro-Glu@1	UNH_Sample_B1	58.122	1	53.5	1.3e-12	1	126819	MOUSE	Unconventional myosin-Ie
[9]	E9Q634	Gln->pyro-Glu	Q	896	-	47	37.4	8.09	2.2e-14	704.041	3	0.21	QVQFHQGFGDLAILKPSNK	Gln->pyro-Glu@1	UNH_Sample_B1	41.297	1	26.4	2e-10	1	126819	MOUSE	Unconventional myosin-Ie
[9]	E9Q634	Gln->pyro-Glu	Q	1096	-	47	37.4	8.09	2.2e-14	632.322	2	0.4	QGLFPNNYVTK	Gln->pyro-Glu@1	UNH_Sample_B1	45.671	1	39.3	1.5e-07	1	126819	MOUSE	Unconventional myosin-Ie
[9]	E9Q634	Oxidation	M	664	-	47	37.4	8.09	2.2e-14	795.395	3	1.4	QGVLHLLQSVNMDSDQFQLGR	Gln->pyro-Glu@1;Oxidation@12	UNH_Sample_B1	54.846	1	57.3	8.6e-11	1	126819	MOUSE	Unconventional myosin-Ie
[9]	E9Q634	Oxidation	M	690	-	47	37.4	8.09	2.2e-14	725.866	2	0.19	APESLFLLEEMR	Oxidation@11	UNH_Sample_B1	41.549	1	54.9	6.7e-14	1	126819	MOUSE	Unconventional myosin-Ie
[9]	E9Q634	Oxidation	M	748	-	47	37.4	8.09	2.2e-14	829.406	3	0.93	NFIGDYIGMEERPELQQFVGK	Oxidation@9	UNH_Sample_B1	45.477	1	50.3	4.1e-13	1	126819	MOUSE	Unconventional myosin-Ie
[9]	E9Q634	Oxidation	M	991	-	47	37.4	8.09	2.2e-14	502.269	3	-0.075	SLYTSMARPPLPR	Oxidation@6	UNH_Sample_B1	25.867	1	30.9	4.6e-09	1	126819	MOUSE	Unconventional myosin-Ie
[10]	P26231	Gln->pyro-Glu	Q	247	-	39	51.1	11.72	4.2e-21	1025.99	4	0.52	QLQQAVTGISNAAQATASDDAAQHQGGSGGELAYALNNFDK	Gln->pyro-Glu@1	UNH_Sample_B1	54.588	1	82.1	4.2e-21	1	100107	MOUSE	Catenin alpha-1
[10]	P26231	Gln->pyro-Glu	Q	288	-	39	51.1	11.72	4.2e-21	758.388	2	0.25	QIIVDPLSFSEER	Gln->pyro-Glu@1	UNH_Sample_B1	62.401	1	48.4	4.3e-12	1	100107	MOUSE	Catenin alpha-1
[10]	P26231	Gln->pyro-Glu	Q	342	-	39	51.1	11.72	4.2e-21	882.916	2	1.9	QALQDLLSEYMGNAGR	Gln->pyro-Glu@1;Oxidation@11	UNH_Sample_B1	58.282	1	47.9	4.5e-15	1	100107	MOUSE	Catenin alpha-1
[10]	P26231	Gln->pyro-Glu	Q	774	-	39	51.1	11.72	4.2e-21	551.798	2	0.17	QDLLAYLQR	Gln->pyro-Glu@1	UNH_Sample_B1	58.377	1	34.8	2.8e-07	1	100107	MOUSE	Catenin alpha-1
[10]	P26231	Met-loss+Acetyl	M	1	-	39	51.1	11.72	4.2e-21	607.32	2	0.43	MTAVHAGNINFK	Met-loss+Acetyl@1	UNH_Sample_B1	29.02	1	47.6	8.7e-10	1	100107	MOUSE	Catenin alpha-1
[10]	P26231	Oxidation	M	190	-	39	51.1	11.72	4.2e-21	414.99	4	1	ALKPEVDKLNIMAAK	Oxidation@12	UNH_Sample_B1	24.825	1	29.4	2.1e-07	1	100107	MOUSE	Catenin alpha-1
[10]	P26231	Oxidation	M	352	-	39	51.1	11.72	4.2e-21	882.916	2	1.9	QALQDLLSEYMGNAGR	Gln->pyro-Glu@1;Oxidation@11	UNH_Sample_B1	58.282	1	47.9	4.5e-15	1	100107	MOUSE	Catenin alpha-1
[10]	P26231	Oxidation	M	484	-	39	51.1	11.72	4.2e-21	612.801	2	1.8	LAQENMDLFK	Oxidation@6	UNH_Sample_B1	28.105	1	35.8	1.6e-08	1	100107	MOUSE	Catenin alpha-1
[10]	P26231	Oxidation	M	560	-	39	51.1	11.72	4.2e-21	776.036	3	1.2	VIHVVTSEMDNYEPGVYTEK	Oxidation@9	UNH_Sample_B1	30.434	1	46.5	1.7e-12	1	100107	MOUSE	Catenin alpha-1
[10]	P26231	Oxidation	M	673	-	39	51.1	11.72	4.2e-21	636.835	2	0.53	AIMAQLPQEQK	Oxidation@3	UNH_Sample_B1	23.859	1	26.4	2.1e-08	1	100107	MOUSE	Catenin alpha-1
[10]	P26231	Oxidation	M	816	-	39	51.1	11.72	4.2e-21	868.119	3	1.6	AEVQNLGGELVVSGVDSAMSLIQAAK	Oxidation@19	UNH_Sample_B1	57.33	1	60.3	9.8e-14	1	100107	MOUSE	Catenin alpha-1
[10]	P26231	Oxidation	M	826	-	39	51.1	11.72	4.2e-21	616.837	2	-0.66	NLMNAVVQTVK	Oxidation@3	UNH_Sample_B1	26.59	1	27.9	1.1e-06	1	100107	MOUSE	Catenin alpha-1
[10]	P26231	Oxidation	M	849	-	39	51.1	11.72	4.2e-21	802.91	2	2.1	SQGMASLNLPAVSWK	Oxidation@4	UNH_Sample_B1	40.201	1	46.1	5.9e-12	1	100107	MOUSE	Catenin alpha-1
[11]	Q62318	Gln->pyro-Glu	Q	284	-	37	49.2	13.25	6.3e-24	471.754	2	0.64	QVSDVQKR	Gln->pyro-Glu@1	UNH_Sample_B1	14.445	1	36.8	2.4e-08	1	88847.9	MOUSE	Transcription intermediary factor 1-beta
[11]	Q62318	Gln->pyro-Glu	Q	332	-	37	49.2	13.25	6.3e-24	457.713	2	0.25	QHWTMTK	Gln->pyro-Glu@1	UNH_Sample_B1	23.764	2	21.6	8.8e-07	1	88847.9	MOUSE	Transcription intermediary factor 1-beta
[11]	Q62318	Met-loss+Acetyl	M	1	-	37	49.2	13.25	6.3e-24	948.416	3	0.37	MAASAAATAAASAATAASAASGSPGSGEGSAGGEK	Met-loss+Acetyl@1;Phospho@23=19	UNH_Sample_B1	50.191	1	76.7	6.3e-24	1	88847.9	MOUSE	Transcription intermediary factor 1-beta
[11]	Q62318	Oxidation	M	136	-	37	49.2	13.25	6.3e-24	601.779	2	0.073	DIVENYFMR	Oxidation@8	UNH_Sample_B1	39.072	1	33.4	6.8e-12	1	88847.9	MOUSE	Transcription intermediary factor 1-beta
[11]	Q62318	Oxidation	M	298	74	37	49.2	13.25	6.3e-24	482.272	2	0.16	MAILQIMK	Oxidation@1=74	UNH_Sample_B1	33.737	1	27.6	6e-08	1	88847.9	MOUSE	Transcription intermediary factor 1-beta
[11]	Q62318	Oxidation	M	304	90	37	49.2	13.25	6.3e-24	482.272	2	0.78	MAILQIMK	Oxidation@7=90	UNH_Sample_B1	32.792	1	32.5	2e-10	1	88847.9	MOUSE	Transcription intermediary factor 1-beta
[11]	Q62318	Oxidation	M	336	-	37	49.2	13.25	6.3e-24	465.71	2	-0.31	QHWTMTK	Gln->pyro-Glu@1;Oxidation@5	UNH_Sample_B1	15.785	1	16.4	2.1e-06	1	88847.9	MOUSE	Transcription intermediary factor 1-beta
[11]	Q62318	Oxidation	M	379	78	37	49.2	13.25	6.3e-24	499.908	3	0.62	MIVDPVEPHGEMK	Oxidation@1=78	UNH_Sample_B1	24.033	1	25.1	3.7e-08	1	88847.9	MOUSE	Transcription intermediary factor 1-beta
[11]	Q62318	Oxidation	M	424	-	37	49.2	13.25	6.3e-24	674.346	3	-0.068	IVAERPGTNSTGPGPMAPPR	Oxidation@16	UNH_Sample_B1	19.844	1	64.2	2.1e-13	1	88847.9	MOUSE	Transcription intermediary factor 1-beta
[11]	Q62318	Oxidation	M	579	-	37	49.2	13.25	6.3e-24	1237.94	3	1.3	EEETEAAIGAPPAAPEGPETKPVLMPLTEGPGAEGPR	Oxidation@25	UNH_Sample_B1	39.471	1	48.5	1.6e-16	1	88847.9	MOUSE	Transcription intermediary factor 1-beta
[11]	Q62318	Phospho	S	23	19	37	49.2	13.25	6.3e-24	948.416	3	0.37	MAASAAATAAASAATAASAASGSPGSGEGSAGGEK	Met-loss+Acetyl@1;Phospho@23=19	UNH_Sample_B1	50.191	1	76.7	6.3e-24	1	88847.9	MOUSE	Transcription intermediary factor 1-beta
[11]	Q62318	Phospho	S	46	9	37	49.2	13.25	6.3e-24	851.884	4	0.77	RPAASSAAAASAAASSPAGGGGEAQELLEHCGVCR	Phospho@11=9	UNH_Sample_B1	33.066	1	19	5.1e-07	1	88847.9	MOUSE	Transcription intermediary factor 1-beta
[12]	Q9ERK4	Gln->pyro-Glu	Q	110	-	41	39.3	9.89	1e-17	578.322	2	-0.078	QLSDAISIIGR	Gln->pyro-Glu@1	UNH_Sample_B1	54.804	1	43.6	7.6e-08	1	110456	MOUSE	Exportin-2
[12]	Q9ERK4	Oxidation	M	100	-	41	39.3	9.89	1e-17	608.661	3	0.36	ANIVHLMLSSPEQIQK	Oxidation@7	UNH_Sample_B1	32.024	1	24.9	1.2e-06	1	110456	MOUSE	Exportin-2
[12]	Q9ERK4	Oxidation	M	352	-	41	39.3	9.89	1e-17	560.795	2	0.7	VIVPNMEFR	Oxidation@6	UNH_Sample_B1	29.344	1	30.6	1.5e-07	1	110456	MOUSE	Exportin-2
[12]	Q9ERK4	Oxidation	M	573	-	41	39.3	9.89	1e-17	834.911	2	0.13	ALTLPGSSENEYIMK	Oxidation@14	UNH_Sample_B1	34.773	1	46.3	7.4e-12	1	110456	MOUSE	Exportin-2
[12]	Q9ERK4	Oxidation	M	820	41	41	39.3	9.89	1e-17	485.74	2	0.09	MFGMVLEK	Oxidation@4=41	UNH_Sample_B1	30.265	1	29.6	7.7e-06	1	110456	MOUSE	Exportin-2
[12]	Q9ERK4	Oxidation	M	920	-	41	39.3	9.89	1e-17	740.846	2	0.42	EHDPVGQMVNNPK	Oxidation@8	UNH_Sample_B1	13.477	1	42	2.1e-14	1	110456	MOUSE	Exportin-2
[13]	P16546	Gln->pyro-Glu	Q	130	-	45	21.6	7.95	4.1e-14	521.285	2	0.77	QWELLLEK	Gln->pyro-Glu@1	UNH_Sample_B1	60.413	1	26.4	5.1e-06	1	284600	MOUSE	Spectrin alpha chain, non-erythrocytic 1
[13]	P16546	Gln->pyro-Glu	Q	2018	-	45	21.6	7.95	4.1e-14	826.084	3	0.45	QETFDAGLQAFQQEGIANITALK	Gln->pyro-Glu@1	UNH_Sample_B1	64.3	1	42.6	3.7e-13	1	284600	MOUSE	Spectrin alpha chain, non-erythrocytic 1
[14]	Q6P5F9	Gln->pyro-Glu	Q	15	-	41	37.1	7.93	4.4e-14	481.253	2	0.83	QLLDFSQK	Gln->pyro-Glu@1	UNH_Sample_B1	48.34	1	34.4	1.6e-08	1	123094	MOUSE	Exportin-1
[14]	Q6P5F9	Gln->pyro-Glu	Q	296	-	41	37.1	7.93	4.4e-14	591.819	2	0.14	QMLPLNTNIR	Gln->pyro-Glu@1	UNH_Sample_B1	48.132	1	41.3	1.5e-06	1	123094	MOUSE	Exportin-1
[14]	Q6P5F9	Gln->pyro-Glu	Q	407	-	41	37.1	7.93	4.4e-14	524.308	2	0.62	QLYLTVLSK	Gln->pyro-Glu@1	UNH_Sample_B1	55.229	1	38.5	3.6e-08	1	123094	MOUSE	Exportin-1
[14]	Q6P5F9	Oxidation	M	73	-	41	37.1	7.93	4.4e-14	828.401	2	0.37	VDTILEFSQNMNTK	Oxidation@11	UNH_Sample_B1	36.421	1	26.4	6.9e-08	1	123094	MOUSE	Exportin-1
[14]	Q6P5F9	Oxidation	M	259	-	41	37.1	7.93	4.4e-14	520.274	2	1.1	FLNVPMFR	Oxidation@6	UNH_Sample_B1	38.238	1	23.3	1.4e-05	1	123094	MOUSE	Exportin-1
[14]	Q6P5F9	Oxidation	M	424	-	41	37.1	7.93	4.4e-14	719.701	3	1.2	MAKPEEVLVVENDQGEVVR	Oxidation@1	UNH_Sample_B1	30.79	1	27.4	6e-07	1	123094	MOUSE	Exportin-1
[14]	Q6P5F9	Oxidation	M	545	-	41	37.1	7.93	4.4e-14	608.994	3	-0.12	AIIASNIMYIVGQYPR	Oxidation@8	UNH_Sample_B1	44.731	1	36	2e-11	1	123094	MOUSE	Exportin-1
[14]	Q6P5F9	Oxidation	M	658	-	41	37.1	7.93	4.4e-14	722.041	3	-0.63	YMLLPNQVWDSIIQQATK	Oxidation@2	UNH_Sample_B1	58.492	1	47	8.9e-10	1	123094	MOUSE	Exportin-1
[14]	Q6P5F9	Oxidation	M	804	-	41	37.1	7.93	4.4e-14	780.422	2	1.3	EPEVLSTMAIIVNK	Oxidation@8	UNH_Sample_B1	37.343	1	35.4	3.4e-10	1	123094	MOUSE	Exportin-1
[14]	Q6P5F9	Oxidation	M	972	-	41	37.1	7.93	4.4e-14	972.837	3	0.87	ISTPLNPGNPVNNQMFIQDYVANLLK	Oxidation@15	UNH_Sample_B1	60.742	1	24.1	1.2e-08	1	123094	MOUSE	Exportin-1
[14]	Q6P5F9	Oxidation	M	1069	63	41	37.1	7.93	4.4e-14	775.692	3	1.7	LQMSVPGILNPHEIPEEMCD	Oxidation@18=63	UNH_Sample_B1	46.612	1	25.6	1.6e-08	1	123094	MOUSE	Exportin-1
[14]	Q6P5F9	Phospho	Y	551	14	41	37.1	7.93	4.4e-14	776.024	3	-5.6	DNKAIIASNIMYIVGQYPR	Phospho@17=14;Phospho@8|12	UNH_Sample_B1	50.408	1	15.1	0.00022	1	123094	MOUSE	Exportin-1
[15]	Q62261	Gln->pyro-Glu	Q	843	-	44	22.6	8.16	1.7e-14	623.837	2	-0.37	QALQDTLALYK	Gln->pyro-Glu@1	UNH_Sample_B1	49.535	1	36	1.5e-07	1	274225	MOUSE	Spectrin beta chain, non-erythrocytic 1
[15]	Q62261	Gln->pyro-Glu	Q	1572	-	44	22.6	8.16	1.7e-14	799.435	2	2.6	QLWGLLIEETEKR	Gln->pyro-Glu@1	UNH_Sample_B1	58.296	1	23.9	1.5e-08	1	274225	MOUSE	Spectrin beta chain, non-erythrocytic 1
[15]	Q62261	Gln->pyro-Glu	Q	1933	-	44	22.6	8.16	1.7e-14	541.286	2	1.2	QIEAQEKPR	Gln->pyro-Glu@1	UNH_Sample_B1	17.775	1	28.3	4.5e-09	1	274225	MOUSE	Spectrin beta chain, non-erythrocytic 1
[15]	Q62261	Met-loss+Acetyl	M	1	-	44	22.6	8.16	1.7e-14	910.756	3	2.1	MTTTVATDYDNIEIQQQYSDVNNR	Met-loss+Acetyl@1	UNH_Sample_B1	45.736	1	37.9	4.2e-13	1	274225	MOUSE	Spectrin beta chain, non-erythrocytic 1
[15]	Q62261	Oxidation	M	1001	-	44	22.6	8.16	1.7e-14	547.937	3	2.1	LTGMERDLVAIEAK	Phospho@2;Oxidation@4	UNH_Sample_B1	23.704	1	18.9	9e-05	1	274225	MOUSE	Spectrin beta chain, non-erythrocytic 1
[15]	Q62261	Phospho	T	999	-	44	22.6	8.16	1.7e-14	547.937	3	2.1	LTGMERDLVAIEAK	Phospho@2;Oxidation@4	UNH_Sample_B1	23.704	1	18.9	9e-05	1	274225	MOUSE	Spectrin beta chain, non-erythrocytic 1
[16]	Q8JZQ9	Gln->pyro-Glu	Q	542	-	37	47.8	9.72	2.2e-17	563.794	2	-0.49	QVPVDVVEMK	Gln->pyro-Glu@1	UNH_Sample_B1	47.113	1	33.7	9.9e-12	1	91371	MOUSE	Eukaryotic translation initiation factor 3 subunit B
[16]	Q8JZQ9	Oxidation	M	430	-	37	47.8	9.72	2.2e-17	763.396	3	15	MTLDTLSIYETPSMGLLDKK	Oxidation@1;Oxidation@14	UNH_Sample_B1	44.433	1	17.9	4.4e-06	1	91371	MOUSE	Eukaryotic translation initiation factor 3 subunit B
[16]	Q8JZQ9	Oxidation	M	443	-	37	47.8	9.72	2.2e-17	763.396	3	15	MTLDTLSIYETPSMGLLDKK	Oxidation@1;Oxidation@14	UNH_Sample_B1	44.433	1	17.9	4.4e-06	1	91371	MOUSE	Eukaryotic translation initiation factor 3 subunit B
[16]	Q8JZQ9	Oxidation	M	485	-	37	47.8	9.72	2.2e-17	537.802	2	-0.063	VTLMQLPTR	Oxidation@4	UNH_Sample_B1	27.626	1	30.9	7e-07	1	91371	MOUSE	Eukaryotic translation initiation factor 3 subunit B
[16]	Q8JZQ9	Oxidation	M	758	69	37	47.8	9.72	2.2e-17	515.241	2	-0.04	MAQELYMK	Oxidation@7=69	UNH_Sample_B1	19.93	1	18.5	6.7e-07	1	91371	MOUSE	Eukaryotic translation initiation factor 3 subunit B
[17]	P26039	Gln->pyro-Glu	Q	2155	-	39	20.9	8.6	2.6e-15	778.377	2	0.78	QELAVFCSPEPPAK	Gln->pyro-Glu@1	UNH_Sample_B1	48.042	1	21.6	5.2e-08	1	269824	MOUSE	Talin-1
[17]	P26039	Gln->pyro-Glu	Q	2198	-	39	20.9	8.6	2.6e-15	650.331	2	0.31	QEDVIATANLSR	Gln->pyro-Glu@1	UNH_Sample_B1	40.826	1	18	3.1e-06	1	269824	MOUSE	Talin-1
[17]	P26039	Oxidation	M	899	-	39	20.9	8.6	2.6e-15	610.309	2	0.8	MATNAAAQNAIK	Oxidation@1	UNH_Sample_B1	14.311	1	25.2	1.6e-10	1	269824	MOUSE	Talin-1
[17]	P26039	Oxidation	M	1734	-	39	20.9	8.6	2.6e-15	733.377	3	0.12	VSQMAQYFEPLTLAAVGAASK	Oxidation@4	UNH_Sample_B1	48.103	1	49.3	5.1e-12	1	269824	MOUSE	Talin-1
[17]	P26039	Phospho	S	1898	-	39	20.9	8.6	2.6e-15	766.732	3	14	LASQAKPAAVAAENEEIGAHIK	Phospho@3	UNH_Sample_B1	43.814	1	17.6	0.00074	1	269824	MOUSE	Talin-1
[18]	Q8BKC5	Gln->pyro-Glu	Q	60	-	34	34.6	9.34	1.1e-16	442.755	2	0.55	QMAAVLLR	Gln->pyro-Glu@1	UNH_Sample_B1	48.525	1	33	5.3e-05	1	123592	MOUSE	Importin-5
[18]	Q8BKC5	Gln->pyro-Glu	Q	816	-	34	34.6	9.34	1.1e-16	1044.11	3	0.51	QDEDYDEQVEESLQDEDDNDVYILTK	Gln->pyro-Glu@1	UNH_Sample_B1	57.683	1	36.3	1.3e-10	1	123592	MOUSE	Importin-5
[18]	Q8BKC5	Oxidation	M	145	-	34	34.6	9.34	1.1e-16	808.892	2	1.6	FLFDSVSSQNMGLR	Oxidation@11	UNH_Sample_B1	40.735	1	45.2	6.5e-13	1	123592	MOUSE	Importin-5
[18]	Q8BKC5	Oxidation	M	450	-	34	34.6	9.34	1.1e-16	601.64	3	0.24	VIAALLQTMEDQGNQR	Oxidation@9	UNH_Sample_B1	34.18	1	27.9	6.8e-09	1	123592	MOUSE	Importin-5
[18]	Q8BKC5	Oxidation	M	535	-	34	34.6	9.34	1.1e-16	818.411	2	0.85	FVPYYDLFMPSLK	Oxidation@9	UNH_Sample_B1	51.607	1	44.1	2.6e-12	1	123592	MOUSE	Importin-5
[18]	Q8BKC5	Oxidation	M	574	68	34	34.6	9.34	1.1e-16	827.914	2	1.8	FMQDASDVMQLLLK	Oxidation@2=68	UNH_Sample_B1	52.489	1	37.9	8.5e-10	1	123592	MOUSE	Importin-5
[18]	Q8BKC5	Oxidation	M	910	-	34	34.6	9.34	1.1e-16	866.395	3	1	YAEYFISPMLQYVCDNSPEVR	Oxidation@9	UNH_Sample_B1	47.637	1	20.6	3.9e-05	1	123592	MOUSE	Importin-5
[19]	O08810	Gln->pyro-Glu	Q	963	-	34	38.8	7.45	3.5e-13	531.253	2	1.2	QDVVLNYPM	Gln->pyro-Glu@1	UNH_Sample_B1	66.539	1	21.9	8.1e-09	1	109362	MOUSE	116 kDa U5 small nuclear ribonucleoprotein component
[19]	O08810	Oxidation	M	686	-	34	38.8	7.45	3.5e-13	580.815	2	0.16	ITMIAEPLEK	Oxidation@3	UNH_Sample_B1	28.194	1	18.4	1.5e-06	1	109362	MOUSE	116 kDa U5 small nuclear ribonucleoprotein component
[19]	O08810	Oxidation	M	956	-	34	38.8	7.45	3.5e-13	727.865	2	-0.039	FFDDPMLLELAK	Oxidation@6	UNH_Sample_B1	49.068	1	37.1	7.7e-10	1	109362	MOUSE	116 kDa U5 small nuclear ribonucleoprotein component
[19]	O08810	Oxidation	M	971	-	34	38.8	7.45	3.5e-13	539.25	2	0.93	QDVVLNYPM	Gln->pyro-Glu@1;Oxidation@9	UNH_Sample_B1	57.427	1	21.9	1.4e-08	1	109362	MOUSE	116 kDa U5 small nuclear ribonucleoprotein component
[20]	Q9JHU4	Gln->pyro-Glu	Q	1359	-	39	9.9	7.53	2.4e-13	619.841	2	-0.16	QNLDGLLNQLK	Gln->pyro-Glu@1	UNH_Sample_B1	56.031	1	40.5	1.2e-10	1	532050	MOUSE	Cytoplasmic dynein 1 heavy chain 1
[20]	Q9JHU4	Gln->pyro-Glu	Q	1848	-	39	9.9	7.53	2.4e-13	885.956	2	-0.53	QTDVLQQLSIQMANAK	Gln->pyro-Glu@1	UNH_Sample_B1	58.803	1	33.7	4.3e-10	1	532050	MOUSE	Cytoplasmic dynein 1 heavy chain 1
[20]	Q9JHU4	Gln->pyro-Glu	Q	4229	-	39	9.9	7.53	2.4e-13	790.428	2	0.16	QNISPDKIPWSALK	Gln->pyro-Glu@1	UNH_Sample_B1	44.644	1	39.4	6.5e-09	1	532050	MOUSE	Cytoplasmic dynein 1 heavy chain 1
[20]	Q9JHU4	Met-loss+Acetyl	M	1	-	39	9.9	7.53	2.4e-13	942.466	3	0.82	MSEPGGGEDGSAGLEVSAVQNVADVAVLQK	Met-loss+Acetyl@1	UNH_Sample_B1	56.713	1	41.9	3.4e-09	1	532050	MOUSE	Cytoplasmic dynein 1 heavy chain 1

## Sheet: Phospho-Hsp90 ES_Troph
			UNH_Sample_B1_5µL_90min_93/modification search									UNH_Sample_B2_5µL_90min_94/modification search						UNH_Sample_B3_5µL_90min_95/modification search
Modification	AA	Site	m/z	z	ppm	DB Peptide	Variable Mods	L/H Int.	Norm. Int.	RT		DB Peptide		L/H Int	Norm. Int.	RT		m/z	z	ppm	DB Peptide	Variable Mods	L/H Intensity	Norm Int.	RT	Score	Expect
Phospho	S	226	691.261	2	0.53	EISDDEAEEEK	Phospho@3;Label:13C(6)15N(2)@11	2.44	1.0383	20.135		EISDDEAEEEK	Phospho@3;Label:13C(6)15N(2)@11	2.23	0.991111	20.288		844.333	2	0.3	EISDDEAEEEKGEK	Phospho@3	2.79	0.853211	15.968	50.5	2.6e-13
Phospho	S	255	791.799	2	1.1	IEDVGSDEEDDSGK	Phospho@6=80;Label:13C(6)15N(2)@14	1.74	0.740426	23.487		IEDVGSDEEDDSGK	Phospho@6=82;Label:13C(6)15N(2)@14	1.78	0.791111	23.478		791.798	2	0.74	IEDVGSDEEDDSGK	Phospho@6=92;Label:13C(6)15N(2)@14	2.68	0.819572	23.644	51.4	1.9e-31
								L/H
							mCherryHsp90 Sample B1 Normalization	2.35
							mCherryHsp90 Sample B2 Normalization	2.25
							mCherryHsp90 Sample B3 Normalization	3.27
								S226	S255
							ES/Troph ratio (UNH_Sample B1)	0.963115	1.35057	1
							ES/Troph ratio (UNH_Sample B2)	1.00897	1.26404	1
							ES/Troph ratio (UNH_Sample B3)	1.17204	1.22015	1
							average ES/Troph ratio	1.04804	1.27826
							p-value	0.527694	0.0184379

## Sheet: MS Sample Log
LC-MS data of WT mcherry-Hsp90 purified from ZHBTc4 cells in ES or tropheblast state
Sample	Run #	Description		SILAC Label	cell state
Replicate 1	UNH_Sample_B1_5µL_90min_93	SILAC ZHBTc4 mCherry IP#1		Heavy	ES
Replicate 2	UNH_Sample_B2_5µL_90min_94	SILAC ZHBTc4 mCherry IP#2		Light	trophoblast
Replicate 3	UNH_Sample_B3_5µL_90min_95	SILAC ZHBTc4 mCherry IP#3
