# Supplementary material for: Phosphorylation-Driven Epichaperome Assembly: A Critical Regulator of Cellular Adaptability and Proliferation
Source: Research Square preprint supplement (doi:10.21203/rs.3.rs-4114038/v1), 2024-04-03
Supplement: Supplementary file 6 [file f11e5b8eefdcc972c5568a50.xlsx]

## Sheet: PU-GA CP 1
Search Name:	PU CP 1/results1		PU CP 1: O5030203, 4, 5, 6, 7, 8, 9, 10, 11, 12, 13, O5030306, in repository\h\2\h2ahymett5
Search Name:	GA CP 1/results1		GA CP 1: O8081012, 13, 14, 15, 17, 18, 19, 20, 22, O8081302 in repository\h\2\h2ahymett5
			PU CP 1/results1			GA CP 1/results1
Rank	Uniq Pep	Acc #	Num Unique	Peptide Count	% Cov	Num Unique	Peptide Count	PU/(GA*2.2978)	% Cov	Protein MW	Species	Protein Name
[1]		P19096	109	205	52.6	21	21	4.24837	8.4	272431	MOUSE	Fatty acid synthase
[2]		B2RQC6	102	257	56.5	15	15	7.45641	8.3	243241	MOUSE	CAD protein
[3]		P07901	73	540	76.1	63	235	1.00003	57.4	84788.6	MOUSE	Heat shock protein HSP 90-alpha
[3-1]	55	P11499	71	708	80.2	60	218	1.4134	56.1	83281.9	MOUSE	Heat shock protein HSP 90-beta
[3-2]	40	Q9CQN1	41	84	60.3	1	14	2.61119	2	80209.6	MOUSE	Heat shock protein 75 kDa, mitochondrial
[3-3]	34	P08113	34	62	45	8	14	1.92731	8.9	92476.5	MOUSE	Endoplasmin
[4]		Q5SWU9	86	135	45.7					265259	MOUSE	Acetyl-CoA carboxylase 1
[5]		Q68FD5	73	227	48.1	19	19	5.19948	9.8	191558	MOUSE	Clathrin heavy chain 1
[6]		Q9JHU4	81	90	23.4	17	18	2.17599	3.7	532050	MOUSE	Cytoplasmic dynein 1 heavy chain 1
[6-1]	3	B1AY13	4	4	1.9					294004	MOUSE	Ubiquitin carboxyl-terminal hydrolase 24
[7]		P70398	83	124	36.7	2	2	26.9823	0.9	290714	MOUSE	Probable ubiquitin carboxyl-terminal hydrolase FAF-X
[8]		Q8BKC5	55	94	68.1	17	17	2.40639	18.6	123592	MOUSE	Importin-5
[9]		P08775	64	87	40.9	2	2	18.9312	1	217178	MOUSE	DNA-directed RNA polymerase II subunit RPB1
[10]		Q01853	55	137	68.5	5	5	11.9244	7.6	89322.6	MOUSE	Transitional endoplasmic reticulum ATPase
[11]		P70168	50	173	62.6	3	3	25.0965	4.5	97185	MOUSE	Importin subunit beta-1
[12]		Q6P5E4	53	107	41.8					176435	MOUSE	UDP-glucose:glycoprotein glucosyltransferase 1
[13]		P57780	60	102	77.5	2	2	22.1951	1.8	104978	MOUSE	Alpha-actinin-4
[13-1]	29	Q7TPR4	48	81	67.2	1	1	35.2511	1.1	103069	MOUSE	Alpha-actinin-1
[14]		Q8CGC7	56	89	43.6	6	6	6.45545	4.8	170081	MOUSE	Bifunctional glutamate/proline--tRNA ligase
[15]		P80314	43	79	82.4	2	2	17.1904	2.6	57477.7	MOUSE	T-complex protein 1 subunit beta
[16]		Q7TPV4	55	74	49.3	16	22	1.46385	15.6	152038	MOUSE	Myb-binding protein 1A
[17]		Q6P5F9	47	79	56	15	18	1.91004	13.9	123094	MOUSE	Exportin-1
[18]		Q6ZQ08	50	58	27.3	4	4	6.31038	1.6	266810	MOUSE	CCR4-NOT transcription complex subunit 1
[19]		Q62167	40	89	66.5	13	15	2.58218	14.5	73102	MOUSE	ATP-dependent RNA helicase DDX3X
[19-2]	44	Q61656	38	55	59.8	29	44	0.543999	35.2	69290.8	MOUSE	Probable ATP-dependent RNA helicase DDX5
[19-4]	28	Q501J6	20	23	32.2	27	45	0.222435	35.7	72400.1	MOUSE	Probable ATP-dependent RNA helicase DDX17
[20]		Q62383	48	53	33.7					199087	MOUSE	Transcription elongation factor SPT6
[21]		P80315	42	83	81.3	7	8	4.51519	16.5	58066.9	MOUSE	T-complex protein 1 subunit delta
[21-1]	37	P80316	37	59	68.8	3	3	8.55891	5.7	59624.6	MOUSE	T-complex protein 1 subunit epsilon
[22]		P42932	48	71	76.8	14	14	2.20708	27.7	59556	MOUSE	T-complex protein 1 subunit theta
[23]		Q76MZ3	41	90	66.4					65323.2	MOUSE	Serine/threonine-protein phosphatase 2A 65 kDa regulatory subunit A alpha isoform
[23-1]	19	Q7TNP2	30	53	59.7					65934.9	MOUSE	Serine/threonine-protein phosphatase 2A 65 kDa regulatory subunit A beta isoform
[24]		P80313	35	90	68.4	4	4	9.79197	7.4	59652.7	MOUSE	T-complex protein 1 subunit eta
[25]		P11983	37	74	80	11	11	2.9277	21.8	60449.2	MOUSE	T-complex protein 1 subunit alpha
[26]		P60710	34	167	81.1	25	82	0.88632	53.9	41737.1	MOUSE	Actin, cytoplasmic 1
[26-2]	3	P68033	18	78	34.7	18	56	0.60617	31.8	42019.4	MOUSE	Actin, alpha cardiac muscle 1
[26-3]	3	P68134	18	78	34.7	18	56	0.60617	31.8	42051.4	MOUSE	Actin, alpha skeletal muscle
[26-4]	2	P62737	16	71	31.8	17	54	0.572206	28.9	42009.4	MOUSE	Actin, aortic smooth muscle
[26-5]	2	P63268	16	71	31.9	17	54	0.572206	29	41877.3	MOUSE	Actin, gamma-enteric smooth muscle
[27]		Q9ERK4	39	53	54.5					110456	MOUSE	Exportin-2
[28]		P99024	30	335	82.2	26	104	1.40184	46.8	49671.3	MOUSE	Tubulin beta-5 chain
[28-1]	8	P68372	30	272	82	28	97	1.22035	50.6	49831.5	MOUSE	Tubulin beta-4B chain
[28-2]	12	Q9CWF2	29	278	82.9	28	80	1.51232	50.6	49953.5	MOUSE	Tubulin beta-2B chain
[28-3]	12	Q7TMM9	28	276	74.2	27	79	1.52044	47.9	49907.4	MOUSE	Tubulin beta-2A chain
[28-4]	10	Q9ERD7	24	206	60.2	20	73	1.2281	28.4	50419.1	MOUSE	Tubulin beta-3 chain
[28-5]	14	Q922F4	21	151	62	17	51	1.28853	24.8	50090.8	MOUSE	Tubulin beta-6 chain
[28-6]	5	Q9D6F9	22	186	67.1	23	87	0.930425	39.6	49586.2	MOUSE	Tubulin beta-4A chain
[29]		P05213	36	337	82.5	21	61	2.4043	41.7	50152.1	MOUSE	Tubulin alpha-1B chain
[29-1]	2	P68369	35	319	82.3	21	60	2.31381	41.7	50136.1	MOUSE	Tubulin alpha-1A chain
[29-2]	2	P68373	32	329	72.6	22	61	2.34722	47.2	49909.8	MOUSE	Tubulin alpha-1C chain
[29-3]	6	P68368	32	193	69.4	17	37	2.27009	29.9	49924.9	MOUSE	Tubulin alpha-4A chain
[29-4]	3	P05214	26	219	64.7	17	48	1.98559	34.4	49960	MOUSE	Tubulin alpha-3 chain
[30]		A8C756	41	44	26.1					217291	MOUSE	Thyroid adenoma-associated protein homolog
[31]		O70133	41	92	32.6	13	14	2.85988	8.6	149476	MOUSE	ATP-dependent RNA helicase A
[32]		Q8BK67				35	83	0	66.2	55983.8	MOUSE	Protein RCC2
[33]		Q8CFI7	47	56	45.5					133912	MOUSE	DNA-directed RNA polymerase II subunit RPB2
[34]		P46935	45	87	56.3	5	5	7.57246	6.9	102707	MOUSE	E3 ubiquitin-protein ligase NEDD4
[35]		P54276	37	45	31.4	15	16	1.224	10.8	151085	MOUSE	DNA mismatch repair protein Msh6
[36]		Q8K3F7	28	77	75.1	10	10	3.35103	34	41462	MOUSE	L-threonine 3-dehydrogenase, mitochondrial
[37]		Q9WUA3	27	44	54.6	2	2	9.57438	4.1	85455.8	MOUSE	6-phosphofructokinase type C
[38]		P29341	36	58	61.5	13	18	1.40231	21.1	70671.5	MOUSE	Polyadenylate-binding protein 1
[38-1]	12	Q921F2	13	24	48.6	3	5	2.08895	9.2	44548.1	MOUSE	TAR DNA-binding protein 43
[39]		Q99P88	39	51	34.4					155119	MOUSE	Nuclear pore complex protein Nup155
[40]		P63017	35	56	53.7	31	68	0.358399	43.7	70871.6	MOUSE	Heat shock cognate 71 kDa protein
[40-1]	16	P20029	11	13	21.1	13	18	0.31431	22.7	72422.6	MOUSE	78 kDa glucose-regulated protein
[41]		P80317	33	63	62	7	7	3.91679	13.6	58004.8	MOUSE	T-complex protein 1 subunit zeta
[42]		P56480	29	71	75.4	10	11	2.80901	23.8	56301	MOUSE	ATP synthase subunit beta, mitochondrial
[43]		Q921M3	37	83	37.1	8	9	4.0135	7.8	135552	MOUSE	Splicing factor 3B subunit 3
[44]		P30416	35	56	72.7	2	2	12.1856	3.7	51572.8	MOUSE	Peptidyl-prolyl cis-trans isomerase FKBP4
[45]		P09405	32	69	43.3	37	125	0.24023	42	76723.7	MOUSE	Nucleolin
[46]		Q8BU30	40	46	38	11	11	1.81992	10	144272	MOUSE	Isoleucine--tRNA ligase, cytoplasmic
[47]		Q03265	27	37	54.2	20	24	0.670932	33.6	59753.1	MOUSE	ATP synthase subunit alpha, mitochondrial
[48]		P60843	29	66	75.4	13	18	1.59573	26.6	46154.4	MOUSE	Eukaryotic initiation factor 4A-I
[48-1]	4	P10630	19	39	47.7	8	13	1.3056	15.5	46402.7	MOUSE	Eukaryotic initiation factor 4A-II
[48-2]	9	Q91VC3	11	17	31.6	4	7	1.05691	8.8	46840.4	MOUSE	Eukaryotic initiation factor 4A-III
[49]		P61979	27	70	64.1	31	140	0.217599	46.9	50976.7	MOUSE	Heterogeneous nuclear ribonucleoprotein K
[50]		Q8QZY1	30	77	55.9					66613.5	MOUSE	Eukaryotic translation initiation factor 3 subunit L
[51]		Q8BJ71	36	45	59					93281.9	MOUSE	Nuclear pore complex protein Nup93
[52]		Q61881	31	42	56.5	4	4	4.56959	6.7	81211.5	MOUSE	DNA replication licensing factor MCM7
[53]		P80318	40	65	66.2	10	10	2.82879	20.9	60630.6	MOUSE	T-complex protein 1 subunit gamma
[54]		Q8VIJ6	13	17	26.3	35	95	0.0778777	35.3	75442.3	MOUSE	Splicing factor, proline- and glutamine-rich
[54-1]	36	Q99K48	19	30	50.1	26	56	0.233142	37.6	54541.4	MOUSE	Non-POU domain-containing octamer-binding protein
[54-2]	19	Q8R326	2	2	5.5	18	29	0.0300137	32.7	58759	MOUSE	Paraspeckle component 1
[55]		O88569	31	92	92.1	12	13	3.07987	31.7	37403	MOUSE	Heterogeneous nuclear ribonucleoproteins A2/B1
[55-1]	27	Q8BG05	24	60	54.6	13	23	1.1353	36.7	39652.3	MOUSE	Heterogeneous nuclear ribonucleoprotein A3
[55-2]	18	P49312	17	61	49.4	12	14	1.89622	36.9	34196.5	MOUSE	Heterogeneous nuclear ribonucleoprotein A1
[55-3]	13	Q9CX86	13	31	54.4	6	6	2.24853	24.3	30530.6	MOUSE	Heterogeneous nuclear ribonucleoprotein A0
[56]		Q8BFY9	35	55	54	3	3	7.97865	3.6	102358	MOUSE	Transportin-1
[56-1]	15	Q99LG2	23	28	35.5	1	1	12.1856	1.4	100457	MOUSE	Transportin-2
[57]		Q8BMJ2	35	40	38.1	8	13	1.33907	7.2	134194	MOUSE	Leucine--tRNA ligase, cytoplasmic
[58]		P60229	25	41	64.9	1	1	17.8432	2.2	52221.3	MOUSE	Eukaryotic translation initiation factor 3 subunit E
[59]		Q9D662	28	43	51.8					86437.9	MOUSE	Protein transport protein Sec23B
[59-1]	14	Q01405	18	26	31					86162.6	MOUSE	Protein transport protein Sec23A
[60]		P43247	28	29	38	6	6	2.10346	6.6	104152	MOUSE	DNA mismatch repair protein Msh2
[61]		P23116	44	51	35.7	13	20	1.10976	7.9	161938	MOUSE	Eukaryotic translation initiation factor 3 subunit A
[62]		Q60597	26	35	33.7	2	2	7.61598	1.7	116450	MOUSE	2-oxoglutarate dehydrogenase, mitochondrial
[63]		P24547	27	44	51					55815.5	MOUSE	Inosine-5'-monophosphate dehydrogenase 2
[63-1]	7	P50096	10	10	20.8					55279	MOUSE	Inosine-5'-monophosphate dehydrogenase 1
[64]		Q6PDQ2	33	39	23.8					217753	MOUSE	Chromodomain-helicase-DNA-binding protein 4
[65]		P58252	27	38	45.2	21	26	0.63606	23.1	95314.9	MOUSE	Elongation factor 2
[65-1]	24	O08810	17	18	21.6	14	17	0.460799	17.5	109362	MOUSE	116 kDa U5 small nuclear ribonucleoprotein component
[66]		Q9JKF1	26	27	23.2	2	2	5.87518	1.2	188744	MOUSE	Ras GTPase-activating-like protein IQGAP1
[67]		O88738	31	33	10.1					532175	MOUSE	Baculoviral IAP repeat-containing protein 6
[68]		Q99PV0	29	36	16.4	21	21	0.746055	8.4	273619	MOUSE	Pre-mRNA-processing-splicing factor 8
[69]		P27659	28	79	57.6	6	9	3.82008	14.9	46110.3	MOUSE	60S ribosomal protein L3
[70]		P52293	28	88	57.7	2	3	12.7658	5.7	57928.6	MOUSE	Importin subunit alpha-1
[71]		P97310	28	34	38.1	7	7	2.11382	9.5	102078	MOUSE	DNA replication licensing factor MCM2
[72]		P27612	26	37	45.8					87221.9	MOUSE	Phospholipase A-2-activating protein
[73]		Q3U0V1	29	36	45.1	32	53	0.295607	37	76776.1	MOUSE	Far upstream element-binding protein 2
[73-1]	27	Q91WJ8	23	30	41	26	54	0.241777	36.1	68540.2	MOUSE	Far upstream element-binding protein 1
[74]		P62908	28	54	88.5	12	13	1.80775	44.9	26674.5	MOUSE	40S ribosomal protein S3
[75]		P56399	28	41	48.8					95834.1	MOUSE	Ubiquitin carboxyl-terminal hydrolase 5
[76]		Q6P2B1	25	39	37.7					104171	MOUSE	Transportin-3
[77]		Q9EPL8	26	35	33.2	1	1	15.232	1.2	119488	MOUSE	Importin-7
[78]		Q6A4J8	34	38	40.9	2	2	8.26878	1.8	128476	MOUSE	Ubiquitin carboxyl-terminal hydrolase 7
[79]		P70698	23	27	44.8					66683	MOUSE	CTP synthase 1
[80]		P16460	30	45	77.2					46584.9	MOUSE	Argininosuccinate synthase
[81]		Q9JLB4	29	30	10.6					399100	MOUSE	Cubilin
[82]		Q8BHN3	28	38	41.3					106912	MOUSE	Neutral alpha-glucosidase AB
[83]		Q7TT37	26	51	25.9	2	2	11.0976	1.6	149585	MOUSE	Elongator complex protein 1
[84]		P26443	27	40	53.2					61337.3	MOUSE	Glutamate dehydrogenase 1, mitochondrial
[85]		P09103	27	36	59.5					57059	MOUSE	Protein disulfide-isomerase
[86]		P25206	23	27	37.8	5	6	1.95839	6.2	91547.1	MOUSE	DNA replication licensing factor MCM3
[87]		Q3U1J4	34	89	38.4	8	8	4.84159	6.4	126854	MOUSE	DNA damage-binding protein 1
[88]		Q9WTM5	24	32	61.1	1	1	13.9264	2.6	51113	MOUSE	RuvB-like 2
[89]		Q6WKZ8	33	37	27.6					199157	MOUSE	E3 ubiquitin-protein ligase UBR2
[90]		O88544	23	36	75.4					46285.2	MOUSE	COP9 signalosome complex subunit 4
[91]		O35134	26	27	21.1					194112	MOUSE	DNA-directed RNA polymerase I subunit RPA1
[92]		Q60864	26	38	44.9	3	3	5.51252	6.1	62582.7	MOUSE	Stress-induced-phosphoprotein 1
[93]		P97351	23	32	65.5	7	8	1.7408	23.1	29885.1	MOUSE	40S ribosomal protein S3a
[94]		P97311	24	27	32.9					92867.9	MOUSE	DNA replication licensing factor MCM6
[95]		Q8VEE4	24	34	45.1					69037.8	MOUSE	Replication protein A 70 kDa DNA-binding subunit
[96]		Q8R418	26	26	18.7					216823	MOUSE	Endoribonuclease Dicer
[97]		Q8R0G9	22	27	28.6					128621	MOUSE	Nuclear pore complex protein Nup133
[98]		P17225	17	43	63.2	4	4	4.67839	8.5	56478.6	MOUSE	Polypyrimidine tract-binding protein 1
[99]		O88477	22	30	45.9	7	7	1.86514	12	63451.1	MOUSE	Insulin-like growth factor 2 mRNA-binding protein 1
[100]		O55201	26	32	30.3					120665	MOUSE	Transcription elongation factor SPT5
[101]		Q6P4T2	22	32	13.2	25	25	0.557055	12.3	244549	MOUSE	U5 small nuclear ribonucleoprotein 200 kDa helicase
[102]		Q9Z2X1	18	47	69.4	6	6	3.40906	15.9	45730.3	MOUSE	Heterogeneous nuclear ribonucleoprotein F
[102-1]	14	O35737	15	45	50.1	6	6	3.26399	17.1	49199.9	MOUSE	Heterogeneous nuclear ribonucleoprotein H
[102-2]	8	P70333	9	24	27.2	2	2	5.22239	6	49280	MOUSE	Heterogeneous nuclear ribonucleoprotein H2
[103]		Q61316	2	2	3.9	27	29	0.0300137	33.5	94133.4	MOUSE	Heat shock 70 kDa protein 4
[103-1]	2	Q61699				3	3	0	3.7	96408.3	MOUSE	Heat shock protein 105 kDa
[104]		Q922B2	22	29	53.7					57147.7	MOUSE	Aspartate--tRNA ligase, cytoplasmic
[105]		O55143	23	43	29					114859	MOUSE	Sarcoplasmic/endoplasmic reticulum calcium ATPase 2
[106]		P10126	20	37	57.1	26	173	0.0930772	48.7	50114.3	MOUSE	Elongation factor 1-alpha 1
[106-1]	1	P62631	8	14	21.8	11	93	0.0655138	20.5	50454.6	MOUSE	Elongation factor 1-alpha 2
[107]		Q9Z0W3	22	48	20.5					158233	MOUSE	Nuclear pore complex protein Nup160
[108]		Q8R1B4	20	22	23.1	7	7	1.36777	8.6	105532	MOUSE	Eukaryotic translation initiation factor 3 subunit C
[109]		P47911	23	53	59.1	5	13	1.77427	14.2	33509.9	MOUSE	60S ribosomal protein L6
[110]		P62715	21	32	73.1					35575.4	MOUSE	Serine/threonine-protein phosphatase 2A catalytic subunit beta isoform
[110-1]	2	P63330	20	32	70.2					35608.5	MOUSE	Serine/threonine-protein phosphatase 2A catalytic subunit alpha isoform
[110-2]	6	Q9CQR6	7	15	27.9					35159.6	MOUSE	Serine/threonine-protein phosphatase 6 catalytic subunit
[111]		Q8BFR5	20	31	57.3	4	5	2.69823	9.5	49508.8	MOUSE	Elongation factor Tu, mitochondrial
[112]		Q7TMK9	17	22	40.4	17	22	0.435199	20.2	69633.2	MOUSE	Heterogeneous nuclear ribonucleoprotein Q
[113]		Q99MN1	24	30	45.9					67840.3	MOUSE	Lysine--tRNA ligase
[114]		O55029	21	24	34.5					102450	MOUSE	Coatomer subunit beta'
[115]		P16858	17	25	57.1	24	46	0.236521	54.1	35810.3	MOUSE	Glyceraldehyde-3-phosphate dehydrogenase
[116]		Q68FL6	21	25	31.4	2	2	5.43999	3.2	101432	MOUSE	Methionine--tRNA ligase, cytoplasmic
[117]		P68040	15	22	60.9	9	9	1.06382	26.5	35077	MOUSE	Guanine nucleotide-binding protein subunit beta-2-like 1
[118]		Q9Z1Q9	20	22	22.7	7	7	1.36777	6.6	140217	MOUSE	Valine--tRNA ligase
[119]		P28658	21	29	56.6	1	1	12.6208	2.3	53707.4	MOUSE	Ataxin-10
[120]		P47738	19	22	58.2					56538	MOUSE	Aldehyde dehydrogenase, mitochondrial
[121]		P47962	19	37	48.5	10	11	1.46385	32.3	34401	MOUSE	60S ribosomal protein L5
[122]		P63085	22	33	72.1					41276	MOUSE	Mitogen-activated protein kinase 1
[123]		Q9D8E6	19	29	44.4	4	6	2.10346	9.8	47154.1	MOUSE	60S ribosomal protein L4
[124]		Q60737	17	27	50.6					45133.9	MOUSE	Casein kinase II subunit alpha
[124-1]	7	O54833	10	11	30.3					41215.6	MOUSE	Casein kinase II subunit alpha'
[125]		P62702	24	33	72.6	1	1	14.3616	4.9	29598	MOUSE	40S ribosomal protein S4, X isoform
[126]		P51881	21	53	58.1	1	1	23.0655	4.4	32931.6	MOUSE	ADP/ATP translocase 2
[126-1]	5	P48962	16	38	53.7					32904.6	MOUSE	ADP/ATP translocase 1
[127]		Q91VX2	10	12	15.8	23	52	0.100431	24.4	117967	MOUSE	Ubiquitin-associated protein 2
[128]		Q91V92	20	25	26.5	7	7	1.55428	7	119729	MOUSE	ATP-citrate synthase
[129]		Q6A009	26	28	17.8					198923	MOUSE	E3 ubiquitin-protein ligase listerin
[130]		P32067	20	29	47.7	17	27	0.467436	34	47756.9	MOUSE	Lupus La protein homolog
[131]		Q9D0I9	20	25	36.2	1	1	10.88	3	75674.2	MOUSE	Arginine--tRNA ligase, cytoplasmic
[132]		Q62318	11	11	15.2	22	28	0.170971	25.1	88847.9	MOUSE	Transcription intermediary factor 1-beta
[133]		P54729	17	20	36.3					70307.1	MOUSE	NEDD8 ultimate buster 1
[134]		P14733	25	33	45.7	6	6	2.39359	10.9	66786.1	MOUSE	Lamin-B1
[135]		Q3TXS7	16	18	21.7	5	5	1.56672	5.4	105731	MOUSE	26S proteasome non-ATPase regulatory subunit 1
[136]		P60122	18	25	52.4	1	1	10.88	2.4	50214.4	MOUSE	RuvB-like 1
[137]		P49717	17	21	29.8					96737	MOUSE	DNA replication licensing factor MCM4
[138]		Q8VDJ3	20	20	19.5	1	1	8.70398	0.9	141744	MOUSE	Vigilin
[139]		P70372	18	28	65	2	2	6.09278	6.1	36169.3	MOUSE	ELAV-like protein 1
[140]		Q9QYI3	17	20	39.7					56476.3	MOUSE	DnaJ homolog subfamily C member 7
[141]		P62196	14	16	50.7					45626.4	MOUSE	26S protease regulatory subunit 8
[141-1]	15	P54775	16	26	55					47408.7	MOUSE	26S protease regulatory subunit 6B
[141-2]	9	P62192	10	10	35.5					49184.9	MOUSE	26S protease regulatory subunit 4
[142]		P63038	5	6	12.2	19	21	0.124343	36.5	60956	MOUSE	60 kDa heat shock protein, mitochondrial
[143]		P14685	15	17	39.6					60718.8	MOUSE	26S proteasome non-ATPase regulatory subunit 3
[144]		P62082	14	26	70.1					22127	MOUSE	40S ribosomal protein S7
[145]		Q8BY71	17	24	58.9					49278.7	MOUSE	Histone acetyltransferase type B catalytic subunit
[146]		P26231	18	21	31.3	1	1	9.13918	1.1	100107	MOUSE	Catenin alpha-1
[147]		P14869	18	31	61.8	11	12	1.12426	42.3	34216.7	MOUSE	60S acidic ribosomal protein P0
[148]		Q80X50	17	18	26.1	20	99	0.0791271	20.3	116800	MOUSE	Ubiquitin-associated protein 2-like
[149]		Q8VEK3	16	26	27.6	18	29	0.390178	19	87918.4	MOUSE	Heterogeneous nuclear ribonucleoprotein U
[150]		Q99JX4	15	22	54.5					42517.4	MOUSE	Eukaryotic translation initiation factor 3 subunit M
[151]		P17918	16	22	73.6	2	2	4.78719	7.3	28785.1	MOUSE	Proliferating cell nuclear antigen
[152]		Q8K2V6	16	22	25.6					112417	MOUSE	Importin-11
[153]		P62259	15	19	67.5	3	3	2.75626	10.2	29174.2	MOUSE	14-3-3 protein epsilon
[153-1]	9	P63101	10	12	46.9	5	5	1.04448	21.6	27771.4	MOUSE	14-3-3 protein zeta/delta
[153-2]	5	P61982	7	8	31.6					28302.8	MOUSE	14-3-3 protein gamma
[153-3]	5	P68254	7	7	35.1					27778.5	MOUSE	14-3-3 protein theta
[153-4]	4	P68510	6	6	34.6					28212	MOUSE	14-3-3 protein eta
[153-5]	3	Q9CQV8	5	5	22.4					28086.7	MOUSE	14-3-3 protein beta/alpha
[154]		Q91VR5	9	9	17.7	19	22	0.178036	28.1	82500.9	MOUSE	ATP-dependent RNA helicase DDX1
[155]		Q9D051	13	17	50.7					38937.5	MOUSE	Pyruvate dehydrogenase E1 component subunit beta, mitochondrial
[156]		Q9JIH2	15	18	51.3					49485.6	MOUSE	Nuclear pore complex protein Nup50
[157]		Q8R146	17	19	39.6					81581.6	MOUSE	Acylamino-acid-releasing enzyme
[158]		Q8BX17	18	19	14.1	6	6	1.37813	3.8	166594	MOUSE	Gem-associated protein 5
[159]		Q99020	14	33	38.9	8	21	0.683884	29.1	30831.5	MOUSE	Heterogeneous nuclear ribonucleoprotein A/B
[159-1]	16	Q60668	13	22	37.5	7	18	0.53191	18.9	38354.4	MOUSE	Heterogeneous nuclear ribonucleoprotein D0
[159-2]	12	Q9Z130	12	17	45.8	5	13	0.569106	16.6	33559.1	MOUSE	Heterogeneous nuclear ribonucleoprotein D-like
[160]		Q9EPU0	21	21	25.3	12	13	0.703014	12.5	123968	MOUSE	Regulator of nonsense transcripts 1
[161]		P14206	14	31	54.6	6	11	1.22647	19.7	32838.4	MOUSE	40S ribosomal protein SA
[162]		Q8CGF7				24	26	0	19.5	123789	MOUSE	Transcription elongation regulator 1
[163]		Q99NB9	19	21	20.5	7	8	1.1424	6.1	145818	MOUSE	Splicing factor 3B subunit 1
[164]		Q8JZQ9	15	19	30.1	5	6	1.37813	6.7	91371	MOUSE	Eukaryotic translation initiation factor 3 subunit B
[165]		Q9CY58	15	20	43.2	16	46	0.189217	35.4	44714.5	MOUSE	Plasminogen activator inhibitor 1 RNA-binding protein
[166]		Q78PY7	14	15	23.8	3	3	2.17599	3.2	102089	MOUSE	Staphylococcal nuclease domain-containing protein 1
[167]		Q8C570	17	22	52.4					40965.5	MOUSE	mRNA export factor
[168]		Q91ZW3	19	20	18.7	5	5	1.7408	4	121628	MOUSE	SWI/SNF-related matrix-associated actin-dependent regulator of chromatin subfamily A member 5
[169]		Q8VDM6	3	3	4.9	14	20	0.0652798	15.7	96002.7	MOUSE	Heterogeneous nuclear ribonucleoprotein U-like protein 1
[170]		Q8VDM4	14	18	22.7					100204	MOUSE	26S proteasome non-ATPase regulatory subunit 2
[171]		Q9JIF0	17	47	53.4					42436	MOUSE	Protein arginine N-methyltransferase 1
[172]		P63037	17	23	48.9					44868.6	MOUSE	DnaJ homolog subfamily A member 1
[173]		Q9CZ30	17	24	58.6					44729.9	MOUSE	Obg-like ATPase 1
[174]		P14148	20	29	57.4	3	3	4.20692	11.5	31419.9	MOUSE	60S ribosomal protein L7
[175]		P50580	17	22	48.2	3	4	2.39359	7.4	43699.2	MOUSE	Proliferation-associated protein 2G4
[176]		Q8K2B3	14	15	29.8					72586.1	MOUSE	Succinate dehydrogenase [ubiquinone] flavoprotein subunit, mitochondrial
[177]		Q9JLJ2	16	20	43.7					53515.2	MOUSE	4-trimethylaminobutyraldehyde dehydrogenase
[178]		Q6P1F6	17	31	49.9					51692.5	MOUSE	Serine/threonine-protein phosphatase 2A 55 kDa regulatory subunit B alpha isoform
[178-1]	4	Q925E7	9	20	23.8					51957.9	MOUSE	Serine/threonine-protein phosphatase 2A 55 kDa regulatory subunit B delta isoform
[179]		P49718	15	18	29.2	9	9	0.870398	13.1	82343.6	MOUSE	DNA replication licensing factor MCM5
[180]		Q9DCH4	11	14	44.6	2	2	3.04639	6.4	37984.6	MOUSE	Eukaryotic translation initiation factor 3 subunit F
[181]		P57784	13	16	49.4					28357.7	MOUSE	U2 small nuclear ribonucleoprotein A'
[182]		P50247	17	23	50.9					47688.6	MOUSE	Adenosylhomocysteinase
[183]		Q924C1	17	17	19					136974	MOUSE	Exportin-5
[184]		Q8R480	15	17	27.3					74777	MOUSE	Nuclear pore complex protein Nup85
[185]		Q9WVG6	17	27	36					65854.3	MOUSE	Histone-arginine methyltransferase CARM1
[186]		Q8BH74	13	13	16.6					106718	MOUSE	Nuclear pore complex protein Nup107
[187]		Q9CW03	21	23	20	2	2	5.00479	1.3	141557	MOUSE	Structural maintenance of chromosomes protein 3
[188]		Q3UPL0	15	20	16.4					133570	MOUSE	Protein transport protein Sec31A
[189]		Q8BP47	14	20	32.6					64279.9	MOUSE	Asparagine--tRNA ligase, cytoplasmic
[190]		O35286	3	3	4.9	17	18	0.0725331	21.6	91007.7	MOUSE	Putative pre-mRNA-splicing factor ATP-dependent RNA helicase DHX15
[190-1]	3	A2A4P0				4	4	0	3.4	142573	MOUSE	ATP-dependent RNA helicase DHX8
[191]		G5E870	19	20	13.1					224130	MOUSE	E3 ubiquitin-protein ligase TRIP12
[192]		P25444	13	18	46.1	8	9	0.870398	26.6	31231.6	MOUSE	40S ribosomal protein S2
[193]		Q91WK2	15	22	51.4					39832.6	MOUSE	Eukaryotic translation initiation factor 3 subunit H
[194]		P60335	12	17	52	3	4	1.8496	10.7	37498.2	MOUSE	Poly(rC)-binding protein 1
[194-1]	8	Q61990	12	24	53.6	3	3	3.48159	10.5	38222	MOUSE	Poly(rC)-binding protein 2
[194-2]	2	P57722	6	10	19.1					39294.5	MOUSE	Poly(rC)-binding protein 3
[195]		P13864	18	19	13.9	9	10	0.826878	5.9	183190	MOUSE	DNA (cytosine-5)-methyltransferase 1
[196]		Q3UMU9				18	29	0	20.5	74291.2	MOUSE	Hepatoma-derived growth factor-related protein 2
[196-1]	4	Q99JF8				5	7	0	8.3	59697.3	MOUSE	PC4 and SFRS1-interacting protein
[196-2]	4	P51859				5	8	0	19	26268.9	MOUSE	Hepatoma-derived growth factor
[197]		Q9ES00	15	18	17.5					133319	MOUSE	Ubiquitin conjugation factor E4 B
[199]		P50544	11	13	26.5					70876.1	MOUSE	Very long-chain specific acyl-CoA dehydrogenase, mitochondrial
[200]		P97855	15	20	43.7	15	26	0.334768	34	51829.2	MOUSE	Ras GTPase-activating protein-binding protein 1
[200-1]	7	P97379	6	11	17.6	8	15	0.319146	14.3	54088.5	MOUSE	Ras GTPase-activating protein-binding protein 2
[201]		Q60865	9	11	20.1	16	36	0.132977	19.5	78169.5	MOUSE	Caprin-1
[202]		Q99JB2	10	12	41.9	2	4	1.3056	8.5	38385.2	MOUSE	Stomatin-like protein 2, mitochondrial
[203]		Q8BG32	13	17	42.9					47437.2	MOUSE	26S proteasome non-ATPase regulatory subunit 11
[204]		O70194	14	17	32.5	1	1	7.39838	2.2	63989.3	MOUSE	Eukaryotic translation initiation factor 3 subunit D
[205]		P12970	14	21	51.5	2	4	2.28479	7.1	29976.8	MOUSE	60S ribosomal protein L7a
[206]		Q3TKT4	16	16	11.1					181429	MOUSE	Transcription activator BRG1
[207]		Q922Q8	11	18	47.6	1	1	7.83358	3.9	34877.7	MOUSE	Leucine-rich repeat-containing protein 59
[208]		O35344	12	16	40.3					57773.3	MOUSE	Importin subunit alpha-4
[208-1]	7	O35343	8	12	25.9					57923.3	MOUSE	Importin subunit alpha-3
[209]		P52480				12	17	0	27.5	57845.4	MOUSE	Pyruvate kinase PKM
[210]		Q9D0M1	13	16	53.4					39432.2	MOUSE	Phosphoribosyl pyrophosphate synthase-associated protein 1
[210-1]	8	Q8R574	10	12	38.8					40881.1	MOUSE	Phosphoribosyl pyrophosphate synthase-associated protein 2
[211]		P38647				14	19	0	26.5	73461.9	MOUSE	Stress-70 protein, mitochondrial
[212]		Q8JZN5	13	15	31.4					68722.7	MOUSE	Acyl-CoA dehydrogenase family member 9, mitochondrial
[213]		Q61937	12	28	42.5	7	20	0.609278	24	32560.3	MOUSE	Nucleophosmin
[214]		Q6ZWX6	7	7	29.5	16	18	0.169244	40.6	36108.5	MOUSE	Eukaryotic translation initiation factor 2 subunit 1
[215]		Q9ERU9	14	16	6.7					341124	MOUSE	E3 SUMO-protein ligase RanBP2
[216]		Q9Z2N8	12	15	46.4					47448.4	MOUSE	Actin-like protein 6A
[217]		Q9DBR1	2	2	4	15	16	0.0543999	18.1	108688	MOUSE	5'-3' exoribonuclease 2
[218]		P62821	12	19	68.3	1	2	4.13439	5.4	22678	MOUSE	Ras-related protein Rab-1A
[218-1]	4	Q9D1G1	12	16	63.2	1	2	3.48159	5.5	22187.3	MOUSE	Ras-related protein Rab-1B
[218-2]	3	Q91V41	4	6	33.5					23897.2	MOUSE	Ras-related protein Rab-14
[218-3]	3	P35279	4	6	23.6					23590	MOUSE	Ras-related protein Rab-6A
[218-4]	2	P61294	3	5	16.8					23461.9	MOUSE	Ras-related protein Rab-6B
[219]		Q02248	13	15	25.7					85471.3	MOUSE	Catenin beta-1
[220]		Q5SWD9	11	14	20.8					92105.9	MOUSE	Pre-rRNA-processing protein TSR1 homolog
[221]		Q8CG48	17	17	17.2	2	2	3.69919	1.8	134240	MOUSE	Structural maintenance of chromosomes protein 2
[222]		Q9WVJ2	14	18	45.7					42809.8	MOUSE	26S proteasome non-ATPase regulatory subunit 13
[223]		O35345	11	17	34.3					59964.9	MOUSE	Importin subunit alpha-7
[223-1]	5	Q60960	9	13	26.6					60183.1	MOUSE	Importin subunit alpha-5
[224]		Q9JII5	10	17	36	3	3	2.46613	9.1	43214.6	MOUSE	DAZ-associated protein 1
[225]		P62242	11	16	44.2	2	2	3.48159	11.5	24205.4	MOUSE	40S ribosomal protein S8
[226]		Q9WUK4	13	14	50.7					38725.1	MOUSE	Replication factor C subunit 2
[227]		P14602	13	17	68.4					23014	MOUSE	Heat shock protein beta-1
[228]		Q9D7G0	12	17	41.8					34834.6	MOUSE	Ribose-phosphate pyrophosphokinase 1
[229]		P26516	11	17	41.4					36540.1	MOUSE	26S proteasome non-ATPase regulatory subunit 7
[230]		Q61753	13	23	30.6	2	2	5.00479	3.8	56586.1	MOUSE	D-3-phosphoglycerate dehydrogenase
[231]		Q07076	11	13	31.3	6	8	0.707198	13.8	49925.7	MOUSE	Annexin A7
[232]		Q8C2Q3	12	12	25.3					69449.2	MOUSE	RNA-binding protein 14
[233]		Q60973	14	17	48.9	1	1	7.39838	1.9	47790.5	MOUSE	Histone-binding protein RBBP7
[233-1]	5	Q60972	12	14	41.6	1	1	6.09278	1.9	47656.1	MOUSE	Histone-binding protein RBBP4
[234]		Q61584	16	23	26.9	16	27	0.370725	20.5	76222.6	MOUSE	Fragile X mental retardation syndrome-related protein 1
[234-1]	1	P35922	1	2	1.3	3	9	0.0967109	5	68989.6	MOUSE	Fragile X mental retardation protein 1 homolog
[234-2]	1	Q9WVR4	2	3	3.3	2	7	0.186514	2.4	73743.3	MOUSE	Fragile X mental retardation syndrome-related protein 2
[235]		Q9D8B3				13	19	0	44.6	24936.3	MOUSE	Charged multivesicular body protein 4b
[235-1]	4	Q9D7F7				6	7	0	24.6	26279.8	MOUSE	Charged multivesicular body protein 4c
[236]		P60670	13	14	31.3					68017.8	MOUSE	Nuclear protein localization protein 4 homolog
[237]		Q9D8N0	12	17	30	9	9	0.822042	19.2	50061.2	MOUSE	Elongation factor 1-gamma
[238]		Q8K183	10	16	33					35015.5	MOUSE	Pyridoxal kinase
[239]		Q9CZX0	12	17	27.4					62385.6	MOUSE	Elongator complex protein 3
[240]		Q4VBE8	10	12	31.3					47211.8	MOUSE	WD repeat-containing protein 18
[241]		Q8BFP9	10	11	29					48995.4	MOUSE	[Pyruvate dehydrogenase (acetyl-transferring)] kinase isozyme 1, mitochondrial
[242]		P31230	12	16	58.7					33997.6	MOUSE	Aminoacyl tRNA synthase complex-interacting multifunctional protein 1
[243]		Q64521	16	18	29					80954.5	MOUSE	Glycerol-3-phosphate dehydrogenase, mitochondrial
[244]		Q9Z321				15	16	0	20.6	96950.1	MOUSE	DNA topoisomerase 3-beta-1
[245]		P61161	12	13	35.8					44761.2	MOUSE	Actin-related protein 2
[246]		Q9CPR4	10	16	48.9					21423.3	MOUSE	60S ribosomal protein L17
[247]		Q9D0F6	11	13	45.1					38096.5	MOUSE	Replication factor C subunit 5
[248]		Q8BGZ4	13	13	27.6					68562.2	MOUSE	Cell division cycle protein 23 homolog
[249]		Q9D071	9	12	16.3					113090	MOUSE	MMS19 nucleotide excision repair protein homolog
[250]		Q6Y7W8	12	18	14.8	1	1	7.83358	1.5	149194	MOUSE	PERQ amino acid-rich with GYF domain-containing protein 2
[251]		P11031				14	19	0	46.5	14427.6	MOUSE	Activated RNA polymerase II transcriptional coactivator p15
[252]		Q8R010	11	18	42.2					35377.9	MOUSE	Aminoacyl tRNA synthase complex-interacting multifunctional protein 2
[253]		Q9R1J0	9	18	34.5					40686.3	MOUSE	Sterol-4-alpha-carboxylate 3-dehydrogenase, decarboxylating
[254]		Q7TMB8	12	12	12.5					145243	MOUSE	Cytoplasmic FMR1-interacting protein 1
[255]		Q61216				12	13	0	21	80223.4	MOUSE	Double-strand break repair protein MRE11A
[256]		Q9Z2Z9	9	10	16.7					77009.3	MOUSE	Glutamine--fructose-6-phosphate aminotransferase [isomerizing] 2
[257]		P83887	11	14	49.4					51101.3	MOUSE	Tubulin gamma-1 chain
[258]		Q8BK64	11	17	40.8					38117.4	MOUSE	Activator of 90 kDa heat shock protein ATPase homolog 1
[259]		Q8R081	10	14	28.2	6	9	0.676976	11.4	63964.2	MOUSE	Heterogeneous nuclear ribonucleoprotein L
[260]		Q8CIE6	13	20	14.1	1	1	8.70398	1.3	138433	MOUSE	Coatomer subunit alpha
[261]		Q11136	8	12	15.6					55029.3	MOUSE	Xaa-Pro dipeptidase
[262]		Q64674	11	14	39.1					33995.2	MOUSE	Spermidine synthase
[263]		Q8CEC0	9	9	18.9					84938.5	MOUSE	Nuclear pore complex protein Nup88
[264]		Q9CWU9	10	13	42					36731.9	MOUSE	Nucleoporin Nup37
[265]		Q923D5				12	16	0	21.7	69875.1	MOUSE	WW domain-binding protein 11
[266]		Q6NZN0				14	25	0	14.1	114144	MOUSE	RNA-binding protein 26
[266-1]	9	Q5SFM8				10	32	0	9.3	118553	MOUSE	RNA-binding protein 27
[267]		Q8BWY3	10	11	30.2	3	3	1.59573	6.9	49031.3	MOUSE	Eukaryotic peptide chain release factor subunit 1
[268]		Q64213				10	20	0	17.5	70403.6	MOUSE	Splicing factor 1
[269]		Q8BJY1	11	12	26.4					55972.6	MOUSE	26S proteasome non-ATPase regulatory subunit 5
[270]		Q8CHW4	12	13	24					80087.1	MOUSE	Translation initiation factor eIF-2B subunit epsilon
[271]		P17182				9	20	0	23.5	47141.2	MOUSE	Alpha-enolase
[272]		Q9Z0X1	12	14	23.7					66766.1	MOUSE	Apoptosis-inducing factor 1, mitochondrial
[273]		P62137	9	14	36.4	9	10	0.609278	31.5	37540.4	MOUSE	Serine/threonine-protein phosphatase PP1-alpha catalytic subunit
[273-1]	2	P63087	5	10	22.6	10	10	0.435199	37.2	36984.1	MOUSE	Serine/threonine-protein phosphatase PP1-gamma catalytic subunit
[273-2]	4	P62141	4	9	18	9	9	0.435199	33.9	37187.2	MOUSE	Serine/threonine-protein phosphatase PP1-beta catalytic subunit
[274]		Q6P542	1	1	3.7	10	10	0.0435199	12.5	94946.2	MOUSE	ATP-binding cassette sub-family F member 1
[275]		Q60932	9	13	46.3	7	8	0.707198	24.7	32351.7	MOUSE	Voltage-dependent anion-selective channel protein 1
[275-1]	2	Q60931	3	3	15.5	1	2	0.652798	3.5	30753	MOUSE	Voltage-dependent anion-selective channel protein 3
[276]		O70252	10	13	50.2					35738.9	MOUSE	Heme oxygenase 2
[277]		O88322	8	8	10.3					153914	MOUSE	Nidogen-2
[278]		Q922H1				13	19	0	21.6	59902.8	MOUSE	Protein arginine N-methyltransferase 3
[279]		Q02053	3	3	5.6	13	13	0.100431	12.9	117810	MOUSE	Ubiquitin-like modifier-activating enzyme 1
[280]		Q99L47	11	21	28.6	2	2	4.56959	4.6	41656.3	MOUSE	Hsc70-interacting protein
[281]		P32037	12	24	19.5					53479.4	MOUSE	Solute carrier family 2, facilitated glucose transporter member 3
[282]		Q9CZ44	8	11	35.1					40710.3	MOUSE	NSFL1 cofactor p47
[284]		Q9R1T2	9	10	42					38620.4	MOUSE	SUMO-activating enzyme subunit 1
[285]		P67778	8	10	37.9					29820.3	MOUSE	Prohibitin
[286]		Q99MZ7	8	11	41.3					32410.5	MOUSE	Peroxisomal trans-2-enoyl-CoA reductase
[287]		Q61081	7	8	23					44593.8	MOUSE	Hsp90 co-chaperone Cdc37
[288]		Q9JIF7	14	17	23.2					107067	MOUSE	Coatomer subunit beta
[289]		Q6ZWN5	19	23	53.6					22591.6	MOUSE	40S ribosomal protein S9
[290]		Q9Z110	9	13	14.3	2	2	2.82879	2.5	87267	MOUSE	Delta-1-pyrroline-5-carboxylate synthase
[291]		Q8BMA6	10	13	22.4					70574.8	MOUSE	Signal recognition particle subunit SRP68
[292]		P62754	8	10	26.1	1	2	2.17599	4.8	28680.9	MOUSE	40S ribosomal protein S6
[293]		Q9CU62	17	18	15.2	2	2	3.91679	1.5	143236	MOUSE	Structural maintenance of chromosomes protein 1A
[294]		Q8CI94	13	13	17.6					96730.8	MOUSE	Glycogen phosphorylase, brain form
[295]		Q6ZWV3	10	13	45.8					24604.1	MOUSE	60S ribosomal protein L10
[296]		Q9CRT8	12	12	15.7					109735	MOUSE	Exportin-T
[297]		P32921	9	10	26.6					54358.4	MOUSE	Tryptophan--tRNA ligase, cytoplasmic
[298]		Q924K8	9	11	17.8					67077.8	MOUSE	Metastasis-associated protein MTA3
[298-1]	2	Q9R190	6	7	11.5					75030.7	MOUSE	Metastasis-associated protein MTA2
[299]		Q8CIG8	6	6	14.4	11	14	0.186514	18.4	72680.5	MOUSE	Protein arginine N-methyltransferase 5
[300]		Q9QYJ0	9	11	31.3					45746	MOUSE	DnaJ homolog subfamily A member 2
[301]		P84099	8	9	31.1	1	3	1.3056	4.6	23466.2	MOUSE	60S ribosomal protein L19
[302]		P97760	9	9	45.1					31311.2	MOUSE	DNA-directed RNA polymerase II subunit RPB3
[303]		Q64514	8	8	9.1					139880	MOUSE	Tripeptidyl-peptidase 2
[304]		Q9WUP7	11	13	41.3	1	1	5.65759	3.3	37617.2	MOUSE	Ubiquitin carboxyl-terminal hydrolase isozyme L5
[305]		O35864	8	9	29.6					37549.1	MOUSE	COP9 signalosome complex subunit 5
[306]		O35435	11	13	35.9					42700.4	MOUSE	Dihydroorotate dehydrogenase (quinone), mitochondrial
[307]		P97384	9	9	21.1					54079.8	MOUSE	Annexin A11
[308]		Q62465	11	13	34.2					43097	MOUSE	Synaptic vesicle membrane protein VAT-1 homolog
[309]		Q8R323	8	8	25					40526.6	MOUSE	Replication factor C subunit 3
[310]		Q8BYK6	7	8	16.9	10	19	0.183242	18.1	63961.8	MOUSE	YTH domain-containing family protein 3
[310-1]	4	Q91YT7	4	4	6.7	7	15	0.116053	10.9	62280.6	MOUSE	YTH domain-containing family protein 2
[310-2]	3	P59326	6	8	16.8	4	5	0.696318	7.2	60879.1	MOUSE	YTH domain-containing family protein 1
[311]		P47811	9	13	33.1					41287.6	MOUSE	Mitogen-activated protein kinase 14
[311-1]	7	Q9WTU6	8	15	19.9					48189.6	MOUSE	Mitogen-activated protein kinase 9
[311-2]	5	Q61831	6	13	11.6					52532.9	MOUSE	Mitogen-activated protein kinase 10
[311-3]	5	Q91Y86	6	13	14.1					44229.7	MOUSE	Mitogen-activated protein kinase 8
[312]		Q922R8	8	12	27.3					48100.8	MOUSE	Protein disulfide-isomerase A6
[313]		Q9Z0U1	3	3	3.3	13	14	0.0932569	12.2	131281	MOUSE	Tight junction protein ZO-2
[314]		Q60715	9	10	25.7					60910.6	MOUSE	Prolyl 4-hydroxylase subunit alpha-1
[315]		Q6ZQ38	1	1	1	12	12	0.0362666	11.5	136333	MOUSE	Cullin-associated NEDD8-dissociated protein 1
[316]		Q9Z204	8	13	20.8	4	7	0.808227	13.1	34385	MOUSE	Heterogeneous nuclear ribonucleoproteins C1/C2
[317]		Q9EPK7	10	11	10.4					123812	MOUSE	Exportin-7
[318]		Q8BTS4	7	7	17.5					55732.3	MOUSE	Nuclear pore complex protein Nup54
[319]		Q923B1				8	8	0	17.8	62290	MOUSE	Lariat debranching enzyme
[320]		P35979	9	11	66.1	6	8	0.598398	35.8	17804.7	MOUSE	60S ribosomal protein L12
[321]		Q9D7N3	10	10	31.3					44929.8	MOUSE	28S ribosomal protein S9, mitochondrial
[322]		Q60716	12	13	31.7					61002.6	MOUSE	Prolyl 4-hydroxylase subunit alpha-2
[323]		Q99LF4	3	5	14.3	13	14	0.155428	24	55249.8	MOUSE	tRNA-splicing ligase RtcB homolog
[324]		P62880	11	15	43.8	2	2	3.26399	5.3	37331.4	MOUSE	Guanine nucleotide-binding protein G(I)/G(S)/G(T) subunit beta-2
[324-1]	4	P62874	10	13	37.1	2	2	2.82879	5.3	37377.3	MOUSE	Guanine nucleotide-binding protein G(I)/G(S)/G(T) subunit beta-1
[325]		O54734	9	10	31.1					49028.3	MOUSE	Dolichyl-diphosphooligosaccharide--protein glycosyltransferase 48 kDa subunit
[326]		Q9CXY6	7	8	27.9	8	17	0.204799	25.4	43062.5	MOUSE	Interleukin enhancer-binding factor 2
[327]		Q8BHC4	10	12	46.3					26476.3	MOUSE	Dephospho-CoA kinase domain-containing protein
[328]		Q9Z1X4				13	14	0	14.9	96021.8	MOUSE	Interleukin enhancer-binding factor 3
[329]		Q61749	8	9	23.7					57624.7	MOUSE	Translation initiation factor eIF-2B subunit delta
[330]		P56959	5	5	9.8	9	42	0.0518094	16.4	52673.5	MOUSE	RNA-binding protein FUS
[331]		P70318	11	16	33.9	7	14	0.49737	21.7	43389.1	MOUSE	Nucleolysin TIAR
[331-1]	1	P52912	2	3	5.7	5	10	0.13056	12.7	42800.3	MOUSE	Nucleolysin TIA-1
[332]		Q9CR57	9	12	35	3	6	0.870398	15.7	23564.3	MOUSE	60S ribosomal protein L14
[333]		P97461	9	12	38.2					22889.6	MOUSE	40S ribosomal protein S5
[334]		Q9JKX6	9	16	50.9					23984.5	MOUSE	ADP-sugar pyrophosphatase
[335]		P07607	9	9	39.4					34958.4	MOUSE	Thymidylate synthase
[336]		P62830	7	8	52.1	6	11	0.316508	37.9	14865.6	MOUSE	60S ribosomal protein L23
[337]		P62717	9	13	48.3					20732.5	MOUSE	60S ribosomal protein L18a
[338]		P26369	3	5	17.1	9	13	0.167384	16.6	53517.5	MOUSE	Splicing factor U2AF 65 kDa subunit
[339]		Q8BX70				11	11	0	3.4	420092	MOUSE	Vacuolar protein sorting-associated protein 13C
[340]		P42227	7	14	19.1					88054.6	MOUSE	Signal transducer and activator of transcription 3
[341]		Q9Z2V5	9	9	9.9	1	1	3.91679	1.2	125788	MOUSE	Histone deacetylase 6
[342]		Q80TM9	13	17	11.6					175014	MOUSE	Nischarin
[343]		O54950	9	11	36.4					37520.7	MOUSE	5'-AMP-activated protein kinase subunit gamma-1
[344]		P62281	9	11	50	6	6	0.797865	36.7	18430.9	MOUSE	40S ribosomal protein S11
[345]		P62301	9	15	46.4	5	8	0.815998	33.1	17222.4	MOUSE	40S ribosomal protein S13
[346]		Q6DFW4	6	7	16					60343.5	MOUSE	Nucleolar protein 58
[347]		Q9QZD9	11	22	46.8					36461.1	MOUSE	Eukaryotic translation initiation factor 3 subunit I
[348]		P10853	3	3	27.8	11	46	0.0283825	51.6	13936.3	MOUSE	Histone H2B type 1-F/J/L
[348-1]	1	Q64524	2	2	20.6	9	33	0.0263757	46	13993.4	MOUSE	Histone H2B type 2-E
[348-2]	1	Q8CGP0	2	2	20.6	9	33	0.0263757	46	13908.2	MOUSE	Histone H2B type 3-B
[348-3]	1	Q9D2U9	2	2	20.6	9	33	0.0263757	46	13994.3	MOUSE	Histone H2B type 3-A
[349]		P63276	7	11	59.3	3	3	1.59573	16.3	15524.2	MOUSE	40S ribosomal protein S17
[350]		O88543	7	9	21.7					47832.5	MOUSE	COP9 signalosome complex subunit 3
[351]		P19253	13	16	44.3	1	1	6.96318	5.4	23464.4	MOUSE	60S ribosomal protein L13a
[352]		Q62189	9	11	41.5	7	8	0.598398	22.6	31835.6	MOUSE	U1 small nuclear ribonucleoprotein A
[352-1]	7	Q9CQI7	5	6	28	6	7	0.373028	23.1	25323.5	MOUSE	U2 small nuclear ribonucleoprotein B''
[353]		O54984	9	10	33					38823.2	MOUSE	ATPase Asna1
[354]		Q6PA06	7	9	13.9					66224.7	MOUSE	Atlastin-2
[355]		Q91YQ5	12	14	29.8					68528.9	MOUSE	Dolichyl-diphosphooligosaccharide--protein glycosyltransferase subunit 1
[356]		Q9DBZ5	7	10	40.8					25086.9	MOUSE	Eukaryotic translation initiation factor 3 subunit K
[357]		Q07813	9	11	44.8					21394.8	MOUSE	Apoptosis regulator BAX
[358]		Q9CQD1	7	7	37.2					23598.8	MOUSE	Ras-related protein Rab-5A
[358-1]	3	P35278	5	5	30.6					23412.7	MOUSE	Ras-related protein Rab-5C
[359]		Q61189				7	22	0	31.4	26021.3	MOUSE	Methylosome subunit pICln
[360]		P70288	6	7	19.7					55302.6	MOUSE	Histone deacetylase 2
[360-1]	3	O09106	6	6	19.3					55075.5	MOUSE	Histone deacetylase 1
[361]		Q99KK9	8	9	21.8					56985.9	MOUSE	Probable histidine--tRNA ligase, mitochondrial
[362]		Q8C0I1	8	9	22.3					71684.1	MOUSE	Alkyldihydroxyacetonephosphate synthase, peroxisomal
[363]		P08752	7	8	26.8					40489.3	MOUSE	Guanine nucleotide-binding protein G(i) subunit alpha-2
[363-1]	4	Q9DC51	7	8	25.7					40538.5	MOUSE	Guanine nucleotide-binding protein G(k) subunit alpha
[363-2]	1	P27600	2	3	5.8					44095.5	MOUSE	Guanine nucleotide-binding protein subunit alpha-12
[364]		P61202	9	11	27.8					51597.1	MOUSE	COP9 signalosome complex subunit 2
[365]		Q8BGF3	11	12	31.4					39790.8	MOUSE	WD repeat-containing protein 92
[366]		P97770	8	12	25					56431.6	MOUSE	THUMP domain-containing protein 3
[367]		Q99MR6	1	1	1.5	12	13	0.0334768	13.8	100453	MOUSE	Serrate RNA effector molecule homolog
[368]		Q6PB66	8	8	7.8	7	8	0.435199	5.5	156616	MOUSE	Leucine-rich PPR motif-containing protein, mitochondrial
[369]		Q9Z1Z2	8	8	31.7					38442.6	MOUSE	Serine-threonine kinase receptor-associated protein
[370]		P26043				9	9	0	14.6	68543.4	MOUSE	Radixin
[370-1]	3	P26040				10	10	0	14.3	69407.4	MOUSE	Ezrin
[371]		O88545	9	12	28.4					35880.4	MOUSE	COP9 signalosome complex subunit 6
[372]		O35593	11	13	51.6	2	2	2.82879	6.5	34577.4	MOUSE	26S proteasome non-ATPase regulatory subunit 14
[373]		Q9CZX8	10	12	50.3	9	12	0.435199	44.8	16085.6	MOUSE	40S ribosomal protein S19
[374]		Q91VM5	1	1	2.1	10	26	0.0167384	24.7	42162	MOUSE	RNA binding motif protein, X-linked-like-1
[375]		P53026	11	15	35.5					24916.6	MOUSE	60S ribosomal protein L10a
[376]		Q9D8W5	8	10	18.6					52895.7	MOUSE	26S proteasome non-ATPase regulatory subunit 12
[377]		Q99KP6	12	18	42.9	1	1	7.83358	1.6	55239.3	MOUSE	Pre-mRNA-processing factor 19
[378]		Q9D0L8	10	11	27.3					53291.8	MOUSE	mRNA cap guanine-N7 methyltransferase
[379]		P62270	10	11	48	3	4	1.1968	19.7	17718.8	MOUSE	40S ribosomal protein S18
[380]		P62960	5	9	27.6	3	8	0.489599	13	35730.2	MOUSE	Nuclease-sensitive element-binding protein 1
[380-1]	2	Q9JKB3	4	5	16.9	2	5	0.435199	6.4	38813.9	MOUSE	Y-box-binding protein 3
[381]		Q1HFZ0	7	8	14.7	2	2	1.7408	3.6	85452.4	MOUSE	tRNA (cytosine(34)-C(5))-methyltransferase
[382]		P14131	9	13	47.3	7	14	0.404113	40.4	16445.5	MOUSE	40S ribosomal protein S16
[383]		Q3U7R1	12	12	15.4					121555	MOUSE	Extended synaptotagmin-1
[384]		Q9Z0N1	2	3	8.3	9	10	0.13056	18.2	51065.9	MOUSE	Eukaryotic translation initiation factor 2 subunit 3, X-linked
[385]		Q99ME2	10	12	12					121899	MOUSE	WD repeat-containing protein 6
[386]		P58281	7	8	13.1					111340	MOUSE	Dynamin-like 120 kDa protein, mitochondrial
[387]		Q08297	7	8	29.2					36971.5	MOUSE	DNA repair protein RAD51 homolog 1
[388]		P62317	4	4	36.4	12	14	0.124343	66.1	13527	MOUSE	Small nuclear ribonucleoprotein Sm D2
[389]		Q99LD9	8	9	29.3					38897.9	MOUSE	Translation initiation factor eIF-2B subunit beta
[390]		Q8C3Y4	7	8	3.9					250360	MOUSE	Kinetochore-associated protein 1
[391]		Q8BTZ7	7	9	29.4					39916.9	MOUSE	Mannose-1-phosphate guanyltransferase beta
[392]		Q60759	7	9	24.4					48606.3	MOUSE	Glutaryl-CoA dehydrogenase, mitochondrial
[393]		P62334	6	7	21.9					44173.4	MOUSE	26S protease regulatory subunit 10B
[394]		Q9ER88	10	12	32.5					44699.7	MOUSE	28S ribosomal protein S29, mitochondrial
[395]		Q6ZQ58	9	9	13.3					121126	MOUSE	La-related protein 1
[396]		Q9CZM2	10	17	44.1					24146.3	MOUSE	60S ribosomal protein L15
[397]		Q3UYV9	9	10	14.8					91927.5	MOUSE	Nuclear cap-binding protein subunit 1
[398]		P06151	12	12	36.4	4	5	1.04448	11.7	36498.9	MOUSE	L-lactate dehydrogenase A chain
[399]		Q8BK63	7	8	26.1					38915.2	MOUSE	Casein kinase I isoform alpha
[400]		Q9JKY0	6	7	28.8					33601.5	MOUSE	Cell differentiation protein RCD1 homolog
[401]		P04370				8	79	0	24.8	27167.8	MOUSE	Myelin basic protein
[402]		Q8BK58	9	10	23.8					54395.8	MOUSE	HSPB1-associated protein 1
[403]		Q6PFD9	8	9	6.7					197242	MOUSE	Nuclear pore complex protein Nup98-Nup96
[404]		Q920A5	7	7	17.9					50965.2	MOUSE	Retinoid-inducible serine carboxypeptidase
[405]		Q9D3W4	6	7	34.9					32790.6	MOUSE	GPN-loop GTPase 3
[406]		Q8R0X7	6	9	12.5					63677.8	MOUSE	Sphingosine-1-phosphate lyase 1
[407]		P23881	8	8	25.1					38850	MOUSE	Transcription elongation factor A protein 3
[408]		Q9CZW5	10	10	16.7					67590.8	MOUSE	Mitochondrial import receptor subunit TOM70
[409]		P97496	6	7	7.2					122891	MOUSE	SWI/SNF complex subunit SMARCC1
[410]		Q9D880	7	15	26.9					39776.8	MOUSE	Mitochondrial import inner membrane translocase subunit TIM50
[411]		Q8VEM8	8	16	24.4					39632.7	MOUSE	Phosphate carrier protein, mitochondrial
[412]		Q922J9	6	6	15.5					59435.3	MOUSE	Fatty acyl-CoA reductase 1
[413]		Q9D1J3				6	6	0	32.4	23532.9	MOUSE	SAP domain-containing ribonucleoprotein
[414]		P70670	3	4	1.9	5	6	0.290133	2.9	220501	MOUSE	Nascent polypeptide-associated complex subunit alpha, muscle-specific form
[415]		Q9DAW6	7	8	18.8	1	1	3.48159	3.1	58370.6	MOUSE	U4/U6 small nuclear ribonucleoprotein Prp4
[416]		Q9DBG6	5	7	14.1					69063.5	MOUSE	Dolichyl-diphosphooligosaccharide--protein glycosyltransferase subunit 2
[417]		P17742				10	23	0	55.5	17971.5	MOUSE	Peptidyl-prolyl cis-trans isomerase A
[417-1]	1	Q9D868				2	3	0	8	20463.9	MOUSE	Peptidyl-prolyl cis-trans isomerase H
[418]		Q9CX34	7	8	31					38159.2	MOUSE	Suppressor of G2 allele of SKP1 homolog, Sgt1
[419]		Q9CXW2	9	10	28.7					41192.5	MOUSE	28S ribosomal protein S22, mitochondrial
[420]		P35550	8	9	26.9	10	13	0.301292	37	34307.1	MOUSE	rRNA 2'-O-methyltransferase fibrillarin
[421]		Q9ERF3	6	10	35.1					33773.1	MOUSE	WD repeat-containing protein 61
[422]		Q5U4D9	7	8	30.8					37315	MOUSE	THO complex subunit 6 homolog
[423]		Q99JI4	7	9	23.9					45536.8	MOUSE	26S proteasome non-ATPase regulatory subunit 6
[424]		O08795	8	12	13.1					58793.3	MOUSE	Glucosidase 2 subunit beta
[425]		Q99LC2	7	11	21.1					48382.2	MOUSE	Cleavage stimulation factor subunit 1
[426]		Q9D753	6	6	30.4					29949.5	MOUSE	Exosome complex component RRP43
[427]		Q80UW8	5	5	29.5					24570.5	MOUSE	DNA-directed RNA polymerases I, II, and III subunit RPABC1
[428]		P70362	7	8	28.3					34481.7	MOUSE	Ubiquitin fusion degradation protein 1 homolog
[429]		P16546	6	8	4.6	4	5	0.696318	1.7	284600	MOUSE	Spectrin alpha chain, non-erythrocytic 1
[430]		Q6PE01	6	7	34.4					39275.9	MOUSE	U5 small nuclear ribonucleoprotein 40 kDa protein
[431]		Q9CSN1				8	10	0	17.2	61476	MOUSE	SNW domain-containing protein 1
[432]		P59235	6	8	27.9					41990	MOUSE	Nucleoporin Nup43
[433]		Q9D0D4	1	1	5.1	9	9	0.0483554	30	35274.6	MOUSE	Probable dimethyladenosine transferase
[434]		P63325	6	11	33.3	4	4	1.1968	18.8	18915.9	MOUSE	40S ribosomal protein S10
[435]		Q8VD65	9	9	8.2					152600	MOUSE	Phosphoinositide 3-kinase regulatory subunit 4
[436]		Q8BVF2	9	9	36.7					27581.4	MOUSE	Phosducin-like protein 3
[437]		Q9DBG3	6	7	8.2	3	3	1.01546	3.2	104584	MOUSE	AP-2 complex subunit beta
[437-1]	3	O35643	5	6	8.8	4	4	0.652798	4.2	103936	MOUSE	AP-1 complex subunit beta-1
[438]		Q61879				13	13	0	6.9	228998	MOUSE	Myosin-10
[438-1]	10	Q8VDD5				13	13	0	6.4	226374	MOUSE	Myosin-9
[438-2]	2	O08638				6	6	0	3	227030	MOUSE	Myosin-11
[439]		Q3ULD5	5	5	16.9					61379.6	MOUSE	Methylcrotonoyl-CoA carboxylase beta chain, mitochondrial
[440]		Q3UA06	6	7	17.1					48377.1	MOUSE	Pachytene checkpoint protein 2 homolog
[441]		P51150	6	6	33.3	2	2	1.3056	11.6	23490	MOUSE	Ras-related protein Rab-7a
[442]		O35841				11	20	0	20.6	56785.7	MOUSE	Apoptosis inhibitor 5
[443]		Q3U2P1	6	8	7.2					118784	MOUSE	Protein transport protein Sec24A
[444]		Q9D902	6	7	27.4					33047	MOUSE	General transcription factor IIE subunit 2
[445]		Q9CYG7	6	8	26.2					34278.3	MOUSE	Mitochondrial import receptor subunit TOM34
[446]		Q9JIK5	10	12	14.5	3	3	1.7408	3.6	93551.9	MOUSE	Nucleolar RNA helicase 2
[447]		Q9DAW9	6	7	24.5					36429	MOUSE	Calponin-3
[448]		Q60872				7	8	0	38.2	16502.6	MOUSE	Eukaryotic translation initiation factor 1A
[448-1]	2	Q8BMJ3				7	8	0	38.2	16460.5	MOUSE	Eukaryotic translation initiation factor 1A, X-chromosomal
[449]		Q8BFQ4				6	6	0	19.5	35079.4	MOUSE	WD repeat-containing protein 82
[450]		P35980	6	11	36.7	2	3	1.59573	12.2	21644.7	MOUSE	60S ribosomal protein L18
[451]		P63323	4	5	37.9					14525.1	MOUSE	40S ribosomal protein S12
[452]		Q8C0C7	6	8	16.9					57599.4	MOUSE	Phenylalanine--tRNA ligase alpha subunit
[453]		P62264	8	11	41.7	3	5	0.957438	16.6	16272.9	MOUSE	40S ribosomal protein S14
[454]		P58742	7	9	15.6					59431.2	MOUSE	Aladin
[455]		P26638	9	9	26.6					58389.2	MOUSE	Serine--tRNA ligase, cytoplasmic
[456]		O35129	7	9	28.1	7	7	0.559541	26.4	33296.7	MOUSE	Prohibitin-2
[457]		Q9D1M0	6	8	26.7	1	1	3.48159	3.4	35566	MOUSE	Protein SEC13 homolog
[458]		Q8VI75	8	9	9.3					119276	MOUSE	Importin-4
[459]		Q9CXF4	7	8	10.9					76527.8	MOUSE	TBC1 domain family member 15
[460]		Q6PDI5	10	10	7.7					203705	MOUSE	Proteasome-associated protein ECM29 homolog
[461]		Q6ZQH8	9	10	6.3					196698	MOUSE	Nucleoporin NUP188 homolog
[462]		P47963	10	12	38.9					24305.7	MOUSE	60S ribosomal protein L13
[463]		Q9CXW4	7	9	31.5	5	7	0.559541	28.7	20252.6	MOUSE	60S ribosomal protein L11
[464]		Q61024	9	9	17.8					64283.3	MOUSE	Asparagine synthetase [glutamine-hydrolyzing]
[465]		Q922D4	8	9	13.3					94653.7	MOUSE	Serine/threonine-protein phosphatase 6 regulatory subunit 3
[466]		O89079	4	6	23.4					34567.4	MOUSE	Coatomer subunit epsilon
[467]		Q9WVA3	6	8	25.5	9	20	0.17408	29.4	36954.8	MOUSE	Mitotic checkpoint protein BUB3
[468]		P62806	3	4	34	6	50	0.0348159	50.5	11367.4	MOUSE	Histone H4
[469]		Q8K310	2	2	5.2	7	7	0.124343	10.6	94631.1	MOUSE	Matrin-3
[470]		Q9D6Z1	4	6	15	1	1	2.61119	2.2	64464.9	MOUSE	Nucleolar protein 56
[471]		Q9QZE5	7	8	14					97513.7	MOUSE	Coatomer subunit gamma-1
[471-1]	2	Q9QXK3	3	4	3.7					97681.4	MOUSE	Coatomer subunit gamma-2
[472]		P62827	6	8	31.5	2	2	1.7408	9.7	24423.3	MOUSE	GTP-binding nuclear protein Ran
[473]		Q6NVF9	1	1	4.5	6	10	0.0435199	14.2	59153.2	MOUSE	Cleavage and polyadenylation specificity factor subunit 6
[474]		P08030	7	9	48.3					19724.1	MOUSE	Adenine phosphoribosyltransferase
[475]		P51410	7	10	40.1					21881.6	MOUSE	60S ribosomal protein L9
[476]		Q8BTI8				8	9	0	3	294843	MOUSE	Serine/arginine repetitive matrix protein 2
[477]		P53995	9	13	6.4					215996	MOUSE	Anaphase-promoting complex subunit 1
[478]		Q99KV1	5	6	23.2					40555.4	MOUSE	DnaJ homolog subfamily B member 11
[479]		P61963	6	9	24.6					38926.5	MOUSE	DDB1- and CUL4-associated factor 7
[480]		O35710	6	6	17.9					48301.3	MOUSE	Nocturnin
[481]		Q9JLI8	6	6	7.4					109620	MOUSE	Squamous cell carcinoma antigen recognized by T-cells 3
[482]		Q8R1N4	4	5	21.8					40890.6	MOUSE	NudC domain-containing protein 3
[483]		P62918	7	13	20.2	4	7	0.808227	16.3	28024.9	MOUSE	60S ribosomal protein L8
[484]		Q91WG4	8	11	11.2					93093.8	MOUSE	Elongator complex protein 2
[485]		Q3TLH4				9	17	0	3.1	310895	MOUSE	Protein PRRC2C
[485-1]	7	Q7TSC1				8	10	0	3.4	229204	MOUSE	Protein PRRC2A
[486]		Q8VHK9	2	2	2.7	8	8	0.1088	8.7	113884	MOUSE	Probable ATP-dependent RNA helicase DHX36
[487]		P49722	4	6	32.5					25926.8	MOUSE	Proteasome subunit alpha type-2
[488]		P21278	5	6	16.7					42024.6	MOUSE	Guanine nucleotide-binding protein subunit alpha-11
[488-1]	2	P21279	3	4	8.9					42158.5	MOUSE	Guanine nucleotide-binding protein G(q) subunit alpha
[489]		P62751	6	6	37.2	7	12	0.217599	41.7	17695.2	MOUSE	60S ribosomal protein L23a
[490]		P51863	7	7	21.1					40301.4	MOUSE	V-type proton ATPase subunit d 1
[491]		O08582				4	5	0	7.2	72301.3	MOUSE	GTP-binding protein 1
[492]		Q8K4Z5				7	7	0	7.7	88545.6	MOUSE	Splicing factor 3A subunit 1
[493]		P13439	5	5	14.1					52292.9	MOUSE	Uridine 5'-monophosphate synthase
[494]		P32233	5	6	18.8	2	2	1.3056	5.7	40512.5	MOUSE	Developmentally-regulated GTP-binding protein 1
[495]		Q64737	4	4	6.7	8	8	0.217599	8.8	107504	MOUSE	Trifunctional purine biosynthetic protein adenosine-3
[496]		Q8VCE2	4	5	19.6					41598.3	MOUSE	GPN-loop GTPase 1
[497]		Q8VDN2	5	10	6	8	8	0.543999	8.7	112983	MOUSE	Sodium/potassium-transporting ATPase subunit alpha-1
[498]		Q91YE6	6	7	12.6					116053	MOUSE	Importin-9
[499]		Q8VBT9	7	8	14.7					59796.2	MOUSE	Tether containing UBX domain for GLUT4
[500]		P23249				6	6	0	7.8	113584	MOUSE	Putative helicase MOV-10
[501]		Q8BFV2	4	5	14.5					46132.5	MOUSE	PCI domain-containing protein 2
[502]		Q8K2Z4	15	16	14	1	1	6.96318	0.6	155666	MOUSE	Condensin complex subunit 1
[503]		P61255	10	13	44.8	7	9	0.628621	32.4	17258.4	MOUSE	60S ribosomal protein L26
[504]		O08579	5	6	29					29435.8	MOUSE	Emerin
[505]		Q9R0E1	5	5	9.6					84923.1	MOUSE	Procollagen-lysine,2-oxoglutarate 5-dioxygenase 3
[506]		P02089				5	20	0	32	15878.4	MOUSE	Hemoglobin subunit beta-2
[507]		Q3URQ0	5	6	8.8					105210	MOUSE	Testis-expressed sequence 10 protein
[508]		Q9D6R2	7	7	23	4	5	0.609278	12	39639.1	MOUSE	Isocitrate dehydrogenase [NAD] subunit alpha, mitochondrial
[509]		O09130				5	10	0	19.4	45121.6	MOUSE	NFATC2-interacting protein
[510]		O70251	2	2	10.7	5	5	0.17408	22.7	24693.9	MOUSE	Elongation factor 1-beta
[511]		Q8K0C4	6	6	17.9					56776.2	MOUSE	Lanosterol 14-alpha demethylase
[512]		Q9QXK7	7	9	14.6					77505.7	MOUSE	Cleavage and polyadenylation specificity factor subunit 3
[513]		Q9CQ65	4	6	26.1					31062.2	MOUSE	S-methyl-5'-thioadenosine phosphorylase
[514]		Q9CZ04	5	7	24					30224.7	MOUSE	COP9 signalosome complex subunit 7a
[515]		Q8CFQ3	9	9	6.1					170295	MOUSE	Intron-binding protein aquarius
[516]		Q9R0N0	6	6	24.5					42295.6	MOUSE	Galactokinase
[517]		Q8C3R1	5	6	9.9					89086.5	MOUSE	BRCA1-associated ATM activator 1
[518]		Q6PGG6	4	4	12.3					65195.5	MOUSE	Guanine nucleotide-binding protein-like 3-like protein
[519]		P54823	5	7	13.5	5	6	0.507732	10.8	54192.1	MOUSE	Probable ATP-dependent RNA helicase DDX6
[520]		Q9D883	5	7	25.9	5	7	0.435199	16.7	27815.3	MOUSE	Splicing factor U2AF 35 kDa subunit
[521]		Q8CEE7	4	5	18.6					36464.4	MOUSE	Retinol dehydrogenase 13
[522]		O09167	5	9	38.1					18562	MOUSE	60S ribosomal protein L21
[523]		Q60749	7	8	17.6	11	18	0.193422	16.5	48371	MOUSE	KH domain-containing, RNA-binding, signal transduction-associated protein 1
[524]		Q8BMF4	4	4	7.6					67942.3	MOUSE	Dihydrolipoyllysine-residue acetyltransferase component of pyruvate dehydrogenase complex, mitochondrial
[525]		O55125	7	7	28.9					33363.5	MOUSE	Protein NipSnap homolog 1
[526]		Q62193	7	9	41.1					29718.8	MOUSE	Replication protein A 32 kDa subunit
[527]		Q9EQQ9	5	5	6.8					103163	MOUSE	Bifunctional protein NCOAT
[528]		P53994	5	5	25.9					23547.7	MOUSE	Ras-related protein Rab-2A
[529]		Q8R2Y8	4	7	25.4					19526.7	MOUSE	Peptidyl-tRNA hydrolase 2, mitochondrial
[530]		P52479	6	6	10.6					87022.8	MOUSE	Ubiquitin carboxyl-terminal hydrolase 10
[531]		O70503	5	6	22.8					34742.1	MOUSE	Estradiol 17-beta-dehydrogenase 12
[532]		P42669	6	6	26.8					34884	MOUSE	Transcriptional activator protein Pur-alpha
[532-1]	1	O35295	3	3	13.3					33901.6	MOUSE	Transcriptional activator protein Pur-beta
[533]		O35326				5	6	0	18.2	30891.6	MOUSE	Serine/arginine-rich splicing factor 5
[534]		P46471	7	7	19.6					48648.3	MOUSE	26S protease regulatory subunit 7
[535]		Q8BTV2				8	10	0	18.5	52011.4	MOUSE	Cleavage and polyadenylation specificity factor subunit 7
[536]		A2ATU0	5	6	10.7					102794	MOUSE	Probable 2-oxoglutarate dehydrogenase E1 component DHKTD1, mitochondrial
[537]		Q80U78	6	6	5.2					126620	MOUSE	Pumilio homolog 1
[538]		Q3U186	6	6	13.8					65336.5	MOUSE	Probable arginine--tRNA ligase, mitochondrial
[539]		P41105	8	8	39.4	8	9	0.386843	50.4	15733.6	MOUSE	60S ribosomal protein L28
[540]		Q9DC23	4	4	7.2					90583.9	MOUSE	DnaJ homolog subfamily C member 10
[541]		P97376				5	5	0	23.6	29127.5	MOUSE	Protein FRG1
[542]		P46061	6	7	15.8	1	1	3.04639	2	63531.5	MOUSE	Ran GTPase-activating protein 1
[543]		Q9D4H8	7	9	12.6					86877.8	MOUSE	Cullin-2
[544]		Q5XJY5	6	6	18.2	2	2	1.3056	4.1	57229.9	MOUSE	Coatomer subunit delta
[545]		Q64012	6	6	24.4					33188.2	MOUSE	RNA-binding protein Raly
[546]		Q9R0E2	4	4	9.1					83595.8	MOUSE	Procollagen-lysine,2-oxoglutarate 5-dioxygenase 1
[547]		P57776	5	5	23.8	6	8	0.271999	23.5	31293.3	MOUSE	Elongation factor 1-delta
[548]		P62315	4	8	54.6	5	8	0.435199	37.8	13281.7	MOUSE	Small nuclear ribonucleoprotein Sm D1
[549]		Q60930	6	6	24.4	6	7	0.373028	24.1	31733.1	MOUSE	Voltage-dependent anion-selective channel protein 2
[550]		P46638	5	5	25.2					24489.7	MOUSE	Ras-related protein Rab-11B
[551]		O08749	6	6	15.5					54272.8	MOUSE	Dihydrolipoyl dehydrogenase, mitochondrial
[552]		Q920Q6	5	5	22.3	2	2	1.088	9	36938.9	MOUSE	RNA-binding protein Musashi homolog 2
[553]		P62843	5	12	51.7	3	3	1.7408	21.4	17040.3	MOUSE	40S ribosomal protein S15
[554]		Q9Z2W0	5	6	15.2					52207.3	MOUSE	Aspartyl aminopeptidase
[555]		P17809	6	13	12					53985.1	MOUSE	Solute carrier family 2, facilitated glucose transporter member 1
[556]		Q99JW5	3	4	18.1					35019.3	MOUSE	Epithelial cell adhesion molecule
[557]		P0CG49	5	33	17.4	3	13	1.10474	11.1	34368.8	MOUSE	Polyubiquitin-B
[558]		Q9Z1D1	6	7	25.3					35638.3	MOUSE	Eukaryotic translation initiation factor 3 subunit G
[559]		Q60631	6	7	36.4					25238.6	MOUSE	Growth factor receptor-bound protein 2
[560]		Q9DCT2	4	4	15.6					30149.6	MOUSE	NADH dehydrogenase [ubiquinone] iron-sulfur protein 3, mitochondrial
[561]		Q8BJZ4	5	7	22.2					35975.6	MOUSE	28S ribosomal protein S35, mitochondrial
[562]		B8ZXI1	4	5	13.3					46288.7	MOUSE	Queuine tRNA-ribosyltransferase subunit QTRTD1
[563]		Q9WUD1	7	9	21.1					34909.6	MOUSE	STIP1 homology and U box-containing protein 1
[564]		Q80VD1				5	8	0	13.1	45349.5	MOUSE	Protein FAM98B
[565]		Q9DBD5	5	5	8.5					118070	MOUSE	Proline-, glutamic acid- and leucine-rich protein 1
[566]		Q3THS6	6	6	17.5					43689.1	MOUSE	S-adenosylmethionine synthase isoform type-2
[567]		Q3TZX8	4	4	7.3	1	1	1.7408	1.3	80840.7	MOUSE	Polynucleotide 5'-hydroxyl-kinase NOL9
[568]		Q2YDW2	6	6	15.5					61230.9	MOUSE	Protein misato homolog 1
[569]		P36536	4	4	28.8					22371.1	MOUSE	GTP-binding protein SAR1a
[569-1]	2	Q9CQC9	3	3	29.8					22382	MOUSE	GTP-binding protein SAR1b
[570]		Q99LB6	3	3	15					37392.9	MOUSE	Methionine adenosyltransferase 2 subunit beta
[571]		P46737	4	5	14.1					33340.4	MOUSE	Lys-63-specific deubiquitinase BRCC36
[572]		Q61543	6	6	6.2	2	2	1.3056	1.8	133735	MOUSE	Golgi apparatus protein 1
[573]		P12815	5	5	38.7					21867.6	MOUSE	Programmed cell death protein 6
[574]		Q8CGY8	5	5	6.2					116953	MOUSE	UDP-N-acetylglucosamine--peptide N-acetylglucosaminyltransferase 110 kDa subunit
[575]		Q05920	5	5	6.9					129686	MOUSE	Pyruvate carboxylase, mitochondrial
[576]		Q8VC57	3	4	16.2					26163.9	MOUSE	BTB/POZ domain-containing protein KCTD5
[577]		P22752	2	3	21.5	5	40	0.0326399	35.4	14135.6	MOUSE	Histone H2A type 1
[577-1]	1	P0C0S6	1	1	7	3	29	0.0150069	20.3	13552.8	MOUSE	Histone H2A.Z
[577-2]	1	Q3THW5	1	1	7	3	29	0.0150069	20.3	13508.8	MOUSE	Histone H2A.V
[578]		Q6PAC3				8	8	0	16.9	51456.7	MOUSE	DDB1- and CUL4-associated factor 13
[579]		P60762	6	6	27.3					41492.9	MOUSE	Mortality factor 4-like protein 1
[579-1]	1	Q9R0Q4	1	1	4.5	1	1	0.435199	3.8	32184	MOUSE	Mortality factor 4-like protein 2
[580]		P11103				4	5	0	5	113101	MOUSE	Poly [ADP-ribose] polymerase 1
[581]		O88796	4	5	20.1					29473.7	MOUSE	Ribonuclease P protein subunit p30
[582]		P37913				9	9	0	11.9	102290	MOUSE	DNA ligase 1
[583]		P62849	5	6	35.3	1	2	1.3056	11.3	15423.3	MOUSE	40S ribosomal protein S24
[584]		Q9WV54	5	9	18.3					44670	MOUSE	Acid ceramidase
[585]		Q8BP67	4	4	26.1	4	9	0.193422	22.3	17779.1	MOUSE	60S ribosomal protein L24
[586]		P62900	6	6	44.8	3	7	0.373028	24	14463	MOUSE	60S ribosomal protein L31
[587]		O55022	4	4	15.9					21694.4	MOUSE	Membrane-associated progesterone receptor component 1
[588]		Q920B9	2	2	2.1	7	14	0.0621713	8.2	119826	MOUSE	FACT complex subunit SPT16
[589]		Q80UU2	4	4	17.1					31129.7	MOUSE	Ribonuclease P protein subunit p38
[590]		Q6P4S8	5	5	2.8					245170	MOUSE	Integrator complex subunit 1
[591]		Q587J6	4	6	6.6					88189.8	MOUSE	LINE-1 type transposase domain-containing protein 1
[592]		Q8R570	3	4	11.1					46524.7	MOUSE	Synaptosomal-associated protein 47
[593]		P62889	4	5	40	7	8	0.271999	47	12784.2	MOUSE	60S ribosomal protein L30
[594]		Q8BMS1	5	6	10.1					82670.6	MOUSE	Trifunctional enzyme subunit alpha, mitochondrial
[595]		P62267	5	8	30.1	4	6	0.580265	29.4	15807.7	MOUSE	40S ribosomal protein S23
[596]		Q9D7B6	4	6	11.4					45020.2	MOUSE	Isobutyryl-CoA dehydrogenase, mitochondrial
[597]		Q8C4J7	4	5	5.7					88266.6	MOUSE	Transducin beta-like protein 3
[598]		O35609	4	4	15.2					38458.5	MOUSE	Secretory carrier-associated membrane protein 3
[599]		Q61733	3	5	12.8					43881.2	MOUSE	28S ribosomal protein S31, mitochondrial
[600]		Q8BTW9				5	6	0	9.8	64623.5	MOUSE	Serine/threonine-protein kinase PAK 4
[601]		Q9EST5	5	5	19.9					31079	MOUSE	Acidic leucine-rich nuclear phosphoprotein 32 family member B
[602]		Q922Q4	4	5	19.7	2	2	1.088	8.8	33659.4	MOUSE	Pyrroline-5-carboxylate reductase 2
[602-1]	1	Q922W5	2	3	9.1	1	1	1.3056	3.6	32373.7	MOUSE	Pyrroline-5-carboxylate reductase 1, mitochondrial
[603]		Q9EQU5	4	7	15.6	4	7	0.435199	14.9	33378	MOUSE	Protein SET
[604]		Q9DBR0	2	2	3.5	5	6	0.145066	6.3	76294.6	MOUSE	A-kinase anchor protein 8
[605]		Q99PU8	5	5	4.3					136670	MOUSE	Putative ATP-dependent RNA helicase DHX30
[606]		P62245	7	9	56.9	3	3	1.3056	12.3	14839.6	MOUSE	40S ribosomal protein S15a
[607]		O35465	4	4	18.4					43529.2	MOUSE	Peptidyl-prolyl cis-trans isomerase FKBP8
[608]		Q9WUA2	5	5	8.8					65697.8	MOUSE	Phenylalanine--tRNA ligase beta subunit
[609]		Q3UA16	4	4	18.6					26457.4	MOUSE	Kinetochore protein Spc25
[610]		Q8BGD9				5	7	0	9	68840.5	MOUSE	Eukaryotic translation initiation factor 4B
[611]		Q7TN29				5	9	0	13.1	46578.2	MOUSE	Stromal membrane-associated protein 2
[612]		Q9QXA5				7	8	0	27	15076.5	MOUSE	U6 snRNA-associated Sm-like protein LSm4
[613]		P62911	4	6	30.4					15859.9	MOUSE	60S ribosomal protein L32
[614]		Q9DBH5	4	4	18.4					40430.1	MOUSE	Vesicular integral-membrane protein VIP36
[615]		P35564	4	8	8.1	1	1	3.48159	2.7	67278.5	MOUSE	Calnexin
[616]		Q8BY87	5	5	4.6					157457	MOUSE	Ubiquitin carboxyl-terminal hydrolase 47
[617]		Q8R1F9	5	7	20.4					41546.9	MOUSE	Ribonuclease P protein subunit p40
[618]		Q9D1M4	6	6	34.5					19858.9	MOUSE	Eukaryotic translation elongation factor 1 epsilon-1
[619]		P50136	4	4	14.3					50371.1	MOUSE	2-oxoisovalerate dehydrogenase subunit alpha, mitochondrial
[620]		Q9WTX5	3	3	30.7	1	1	1.3056	4.9	18672.2	MOUSE	S-phase kinase-associated protein 1
[621]		P51660	2	2	3.9	3	3	0.290133	4.9	79482.5	MOUSE	Peroxisomal multifunctional enzyme type 2
[622]		Q9D903	4	5	17.6					34703	MOUSE	Probable rRNA-processing protein EBP2
[623]		Q8BHJ5	3	4	7.4					55661.4	MOUSE	F-box-like/WD repeat-containing protein TBL1XR1
[623-1]	2	Q9QXE7	4	5	6.8					56802.8	MOUSE	F-box-like/WD repeat-containing protein TBL1X
[624]		Q8BJW6				4	4	0	8.4	64403.8	MOUSE	Eukaryotic translation initiation factor 2A
[625]		Q9D1H7	3	4	12.2					36525.6	MOUSE	Golgi to ER traffic protein 4 homolog
[626]		Q07417	5	5	18.7					44890	MOUSE	Short-chain specific acyl-CoA dehydrogenase, mitochondrial
[627]		P14901	3	4	20.8					32929	MOUSE	Heme oxygenase 1
[628]		P14576	5	6	14.3					55721.3	MOUSE	Signal recognition particle 54 kDa protein
[629]		Q9WVM3	3	4	9.2					63021.6	MOUSE	Anaphase-promoting complex subunit 7
[630]		Q8BHB4	4	4	7.2					105776	MOUSE	WD repeat-containing protein 3
[631]		Q9DBE8	3	4	11.8					47405.4	MOUSE	Alpha-1,3/1,6-mannosyltransferase ALG2
[632]		Q9DB77	5	5	15.5					48235.3	MOUSE	Cytochrome b-c1 complex subunit 2, mitochondrial
[633]		Q11011	4	4	7.3					103326	MOUSE	Puromycin-sensitive aminopeptidase
[634]		Q99LE6	5	6	9.9	1	1	2.61119	2.2	71782.4	MOUSE	ATP-binding cassette sub-family F member 2
[635]		P14115	4	5	24.3	1	2	1.088	7.4	16605.6	MOUSE	60S ribosomal protein L27a
[636]		Q8K2F8				5	13	0	11.5	50546.4	MOUSE	Protein LSM14 homolog A
[636-1]	2	Q8CGC4				3	6	0	7.5	42310.3	MOUSE	Protein LSM14 homolog B
[637]		Q6ZWV7	4	5	26	1	3	0.725331	8.1	14552.7	MOUSE	60S ribosomal protein L35
[638]		Q3TUH1	4	5	12.2					37828.1	MOUSE	Mitochondrial translocator assembly and maintenance protein 41 homolog
[639]		A2ARV4	4	4	1					519213	MOUSE	Low-density lipoprotein receptor-related protein 2
[640]		Q99J09	2	2	6.4	4	4	0.217599	14.9	36942.9	MOUSE	Methylosome protein 50
[641]		Q9CXW3	4	6	28.8					26510.4	MOUSE	Calcyclin-binding protein
[642]		P52432	4	4	15					39107	MOUSE	DNA-directed RNA polymerases I and III subunit RPAC1
[643]		O35704	3	4	8.7					52535.1	MOUSE	Serine palmitoyltransferase 1
[644]		P61164	3	3	10.9					42614.1	MOUSE	Alpha-centractin
[645]		Q791V5	3	7	18.2					33499.5	MOUSE	Mitochondrial carrier homolog 2
[646]		Q5NCR9				4	4	0	9.2	63799.4	MOUSE	Nuclear speckle splicing regulatory protein 1
[647]		Q6P9L6	4	4	5.6					160122	MOUSE	Kinesin-like protein KIF15
[648]		P67984	5	5	50.8	3	5	0.435199	19.5	14759.1	MOUSE	60S ribosomal protein L22
[648-1]	1	Q9D7S7	2	2	16.4					14467.5	MOUSE	60S ribosomal protein L22-like 1
[649]		Q9D7H3	5	5	21.6					39254.8	MOUSE	RNA 3'-terminal phosphate cyclase
[650]		Q99M87	5	5	10.4					52443.9	MOUSE	DnaJ homolog subfamily A member 3, mitochondrial
[651]		Q8VCB1	3	5	7.6					75410.1	MOUSE	Nucleoporin NDC1
[652]		Q9D083	3	3	29.9					23416.6	MOUSE	Kinetochore protein Spc24
[653]		Q9CWX9	1	2	4	3	3	0.290133	7.5	50639.1	MOUSE	Probable ATP-dependent RNA helicase DDX47
[654]		Q920R0	4	4	3.5					182568	MOUSE	Alsin
[655]		P97823	4	4	25.2					24687.9	MOUSE	Acyl-protein thioesterase 1
[656]		Q9CYD3	5	5	13.5					46169.7	MOUSE	Cartilage-associated protein
[657]		Q9CY50	3	4	11.9					32065.3	MOUSE	Translocon-associated protein subunit alpha
[658]		Q9D0M0	3	3	16.5					31825.8	MOUSE	Exosome complex exonuclease RRP42
[659]		Q8R060	4	4	13.2					66839.9	MOUSE	Protein zwilch homolog
[660]		Q60760	3	4	7.6					70585.3	MOUSE	Growth factor receptor-bound protein 10
[661]		Q8VC52	4	5	26.2					22462.8	MOUSE	RNA-binding protein with multiple splicing 2
[661-1]	2	Q9WVB0	3	4	20.3					21816.1	MOUSE	RNA-binding protein with multiple splicing
[662]		Q6A068	1	1	1.2	4	4	0.1088	6.9	92190.3	MOUSE	Cell division cycle 5-like protein
[663]		O88685	4	4	9	1	1	1.7408	2.3	49549.4	MOUSE	26S protease regulatory subunit 6A
[664]		Q91VR2	5	5	19.8	4	4	0.543999	13.4	32886.2	MOUSE	ATP synthase subunit gamma, mitochondrial
[665]		P11440	4	4	17.8					34106.9	MOUSE	Cyclin-dependent kinase 1
[666]		Q8BJH1				7	9	0	22.5	35152.4	MOUSE	Zinc finger C2HC domain-containing protein 1A
[667]		Q8JZM0	5	5	16.8					38962	MOUSE	Dimethyladenosine transferase 1, mitochondrial
[668]		P28659	8	9	19.5					52107.7	MOUSE	CUGBP Elav-like family member 1
[669]		P35486	5	5	21					43232.1	MOUSE	Pyruvate dehydrogenase E1 component subunit alpha, somatic form, mitochondrial
[670]		Q62241				4	6	0	24.5	17363.9	MOUSE	U1 small nuclear ribonucleoprotein C
[671]		P27048	5	7	19.5					23656.2	MOUSE	Small nuclear ribonucleoprotein-associated protein B
[672]		Q91VY9	2	2	7.1					53451.6	MOUSE	Zinc finger protein 622
[673]		Q9QXB9	2	3	8.5					40718.7	MOUSE	Developmentally-regulated GTP-binding protein 2
[674]		Q8K019				5	7	0	5.1	106003	MOUSE	Bcl-2-associated transcription factor 1
[675]		Q9WV68	3	4	14.7					31300.6	MOUSE	Peroxisomal 2,4-dienoyl-CoA reductase
[676]		Q9DBL1	3	3	11.1					47874.5	MOUSE	Short/branched chain specific acyl-CoA dehydrogenase, mitochondrial
[677]		Q8CGK3	4	4	11.4					105844	MOUSE	Lon protease homolog, mitochondrial
[678]		Q9Z2D8	3	4	9.8					32168.7	MOUSE	Methyl-CpG-binding domain protein 3
[679]		Q9QXX4	3	4	8.1					74467.6	MOUSE	Calcium-binding mitochondrial carrier protein Aralar2
[680]		P62852	4	5	22.4	5	12	0.181333	29.6	13742.2	MOUSE	40S ribosomal protein S25
[681]		Q80UK8	3	3	3.6					133517	MOUSE	Integrator complex subunit 2
[682]		O55135	3	4	21.2					26511.3	MOUSE	Eukaryotic translation initiation factor 6
[683]		P70700	6	8	7.3					128214	MOUSE	DNA-directed RNA polymerase I subunit RPA2
[684]		Q9DCX2	3	3	33.5					18749.6	MOUSE	ATP synthase subunit d, mitochondrial
[685]		P97287	3	4	16.9					35217.3	MOUSE	Induced myeloid leukemia cell differentiation protein Mcl-1 homolog
[686]		P39447	4	4	3.4					194743	MOUSE	Tight junction protein ZO-1
[687]		P61358	7	11	49.3	5	6	0.797865	33.1	15797.9	MOUSE	60S ribosomal protein L27
[688]		O35857	3	3	8.8					51091.8	MOUSE	Mitochondrial import inner membrane translocase subunit TIM44
[689]		Q8BWY9	3	3	4.2					102044	MOUSE	Protein CIP2A
[690]		Q9D554	3	4	7.2	2	2	0.870398	4.4	58842.4	MOUSE	Splicing factor 3A subunit 3
[691]		P18760				3	4	0	22.9	18559.7	MOUSE	Cofilin-1
[692]		Q8BK72	4	4	13					47778.9	MOUSE	28S ribosomal protein S27, mitochondrial
[693]		Q8BW10	5	5	20.3					45464.1	MOUSE	RNA-binding protein NOB1
[694]		Q9R0Q9	3	4	13.8					26497.8	MOUSE	Mannose-P-dolichol utilization defect 1 protein
[695]		Q8R127	2	2	8.2					47129.7	MOUSE	Saccharopine dehydrogenase-like oxidoreductase
[696]		Q9CWN7	3	4	12.5					54959.7	MOUSE	CCR4-NOT transcription complex subunit 11
[697]		Q9JJ80	4	4	14.4					35364	MOUSE	Ribosome production factor 2 homolog
[698]		P45376				5	5	0	16.8	35732.6	MOUSE	Aldose reductase
[699]		Q8R123	3	3	8.5					54766.9	MOUSE	FAD synthase
[700]		Q80X73	2	3	7.5					43349.5	MOUSE	Protein pelota homolog
[701]		Q6A026	3	3	3.2					150329	MOUSE	Sister chromatid cohesion protein PDS5 homolog A
[702]		Q62351	4	5	6.9					85732.1	MOUSE	Transferrin receptor protein 1
[703]		Q91XU0	3	3	4.7					71794.4	MOUSE	ATPase WRNIP1
[704]		Q8BMG7	4	4	3.1					152536	MOUSE	Rab3 GTPase-activating protein non-catalytic subunit
[705]		Q6PGC1	3	3	3.3					153977	MOUSE	ATP-dependent RNA helicase Dhx29
[706]		Q8BLN5	3	3	5.7					83142.1	MOUSE	Lanosterol synthase
[707]		Q80ZK9	4	5	9.5					75733.2	MOUSE	WD and tetratricopeptide repeats protein 1
[708]		Q7TQH0				4	7	0	4.1	110650	MOUSE	Ataxin-2-like protein
[709]		Q80UU9	3	3	13.8					23334.3	MOUSE	Membrane-associated progesterone receptor component 2
[710]		Q05D44	3	3	4.7	4	5	0.261119	3.2	137617	MOUSE	Eukaryotic translation initiation factor 5B
[711]		Q91W67	3	4	10.5					40433.7	MOUSE	Ubiquitin-like protein 7
[712]		Q9DCN2	3	4	15.9					34128	MOUSE	NADH-cytochrome b5 reductase 3
[713]		Q91YH5	2	3	7.2					60575.6	MOUSE	Atlastin-3
[714]		Q922D8				4	4	0	4.7	101200	MOUSE	C-1-tetrahydrofolate synthase, cytoplasmic
[715]		Q922H2	2	3	7.7					47923.4	MOUSE	[Pyruvate dehydrogenase (acetyl-transferring)] kinase isozyme 3, mitochondrial
[716]		Q8BLR9	3	3	12					40241.7	MOUSE	Hypoxia-inducible factor 1-alpha inhibitor
[717]		P84104				6	7	0	29.3	19329.8	MOUSE	Serine/arginine-rich splicing factor 3
[718]		O70126	3	3	13					39384.6	MOUSE	Aurora kinase B
[719]		Q8CI11	4	5	14.1					60787	MOUSE	Guanine nucleotide-binding protein-like 3
[720]		Q66JS6	3	3	22.1					29486	MOUSE	Eukaryotic translation initiation factor 3 subunit J-B
[721]		Q923G2	3	4	22					17143.5	MOUSE	DNA-directed RNA polymerases I, II, and III subunit RPABC3
[722]		P15864				4	7	0	19.8	21266.8	MOUSE	Histone H1.2
[723]		Q9Z247	5	5	11.4					62996	MOUSE	Peptidyl-prolyl cis-trans isomerase FKBP9
[724]		Q923K4	2	2	7.5					52175.9	MOUSE	tRNA modification GTPase GTPBP3, mitochondrial
[725]		P48453	3	3	7					59174	MOUSE	Serine/threonine-protein phosphatase 2B catalytic subunit beta isoform
[726]		Q9Z1R2	3	3	4.7	3	3	0.435199	2.5	121038	MOUSE	Large proline-rich protein BAG6
[727]		Q9D0F3	2	2	8.1					57789.2	MOUSE	Protein ERGIC-53
[728]		P24369	2	2	9.7	5	5	0.17408	26.4	23713.7	MOUSE	Peptidyl-prolyl cis-trans isomerase B
[729]		Q62261	5	5	3.6	8	8	0.271999	3.1	274225	MOUSE	Spectrin beta chain, non-erythrocytic 1
[730]		Q99L48	3	3	7.8					57611.7	MOUSE	60S ribosomal export protein NMD3
[731]		Q9DC69	4	6	18.8					42525.6	MOUSE	NADH dehydrogenase [ubiquinone] 1 alpha subcomplex subunit 9, mitochondrial
[732]		Q9D5T0	4	5	12.5					40744.4	MOUSE	ATPase family AAA domain-containing protein 1
[733]		Q8K3W0	3	3	11.5					43545.1	MOUSE	BRCA1-A complex subunit BRE
[734]		Q8BTZ4	4	5	8.9					83098.4	MOUSE	Anaphase-promoting complex subunit 5
[735]		Q8C3P7				4	6	0	8.8	64616.7	MOUSE	N6-adenosine-methyltransferase subunit METTL3
[736]		Q8C2E7	2	2	2.8					134112	MOUSE	WASH complex subunit strumpellin
[737]		Q8BYA0	2	2	2.3					133322	MOUSE	Tubulin-specific chaperone D
[738]		Q9CWS4	3	4	5.7					67844.3	MOUSE	Integrator complex subunit 11
[739]		Q8CG47	3	3	2.4	5	5	0.261119	3.6	146896	MOUSE	Structural maintenance of chromosomes protein 4
[740]		Q99J62	4	5	10.4					39867.1	MOUSE	Replication factor C subunit 4
[741]		Q9DCA5	4	4	12.5					41241.5	MOUSE	Ribosome biogenesis protein BRX1 homolog
[742]		Q8QZY9	1	1	5.4	2	2	0.217599	5	44356.1	MOUSE	Splicing factor 3B subunit 4
[743]		Q8VDH1	2	2	5.4					72173.3	MOUSE	F-box only protein 21
[744]		Q99LG4	2	2	6.6					48795.7	MOUSE	Tetratricopeptide repeat protein 5
[745]		O35658	3	3	15.1	1	1	1.3056	4.7	31013.1	MOUSE	Complement component 1 Q subcomponent-binding protein, mitochondrial
[746]		Q5I043	3	3	3.8					119319	MOUSE	Ubiquitin carboxyl-terminal hydrolase 28
[747]		O88967	2	2	4.9					80028.7	MOUSE	ATP-dependent zinc metalloprotease YME1L1
[748]		Q9DB98				3	3	0	16.5	30469.4	MOUSE	Leukocyte receptor cluster member 1 homolog
[749]		P28656	2	3	7.2	1	1	1.3056	4.3	45345.5	MOUSE	Nucleosome assembly protein 1-like 1
[750]		Q04692	4	4	4.9					116452	MOUSE	SWI/SNF-related matrix-associated actin-dependent regulator of chromatin subfamily A containing DEAD/H box 1
[751]		Q3TSG4				4	7	0	8.4	44411.4	MOUSE	RNA demethylase ALKBH5
[752]		P17426	2	2	2.8	2	2	0.435199	1.8	107665	MOUSE	AP-2 complex subunit alpha-1
[753]		Q91W89	2	2	2.9					115689	MOUSE	Alpha-mannosidase 2C1
[754]		Q3UKJ7	1	1	1.9	4	4	0.1088	8.2	57544.4	MOUSE	WD40 repeat-containing protein SMU1
[755]		P17095				4	6	0	33.6	11614.1	MOUSE	High mobility group protein HMG-I/HMG-Y
[756]		P62835	3	3	21.7					20987.4	MOUSE	Ras-related protein Rap-1A
[757]		P61965	3	3	15	1	1	1.3056	3.6	36588.8	MOUSE	WD repeat-containing protein 5
[758]		Q9D0W5				4	4	0	21.1	18237	MOUSE	Peptidyl-prolyl cis-trans isomerase-like 1
[759]		O88735				7	8	0	9.3	82022.2	MOUSE	Ensconsin
[760]		Q99LC5	1	1	4.8	4	4	0.1088	12.9	35009.7	MOUSE	Electron transfer flavoprotein subunit alpha, mitochondrial
[761]		P62962				3	3	0	30	14957.4	MOUSE	Profilin-1
[762]		Q99JY0	5	5	14.1					51386.8	MOUSE	Trifunctional enzyme subunit beta, mitochondrial
[763]		P62320	2	2	15.1	4	8	0.1088	31	13916.4	MOUSE	Small nuclear ribonucleoprotein Sm D3
[764]		P62855	4	6	40	3	5	0.522239	27	13015.5	MOUSE	40S ribosomal protein S26
[765]		Q9D0E1	3	3	6.4	3	3	0.435199	4.8	77649.5	MOUSE	Heterogeneous nuclear ribonucleoprotein M
[766]		A2BE28	4	4	8.6					89415.1	MOUSE	Ribosomal biogenesis protein LAS1L
[767]		P20108	2	3	9.7					28127.3	MOUSE	Thioredoxin-dependent peroxide reductase, mitochondrial
[768]		P36552	3	4	10.8					49715	MOUSE	Oxygen-dependent coproporphyrinogen-III oxidase, mitochondrial
[769]		P30999	4	4	5.1					104926	MOUSE	Catenin delta-1
[770]		Q07832	3	3	9.1	2	2	0.652798	5.3	68301.4	MOUSE	Serine/threonine-protein kinase PLK1
[771]		Q8K274	7	8	12.9					34468.6	MOUSE	Ketosamine-3-kinase
[772]		O54692	3	3	7.8					88063.6	MOUSE	Centromere/kinetochore protein zw10 homolog
[773]		Q08943	1	1	1.8	2	2	0.217599	3.7	80861.1	MOUSE	FACT complex subunit SSRP1
[774]		P37040	2	2	8					77044.6	MOUSE	NADPH--cytochrome P450 reductase
[775]		Q9EPJ9	2	2	6					45288.6	MOUSE	ADP-ribosylation factor GTPase-activating protein 1
[776]		Q80YD1	3	3	4.5					87005.7	MOUSE	ATP-dependent RNA helicase SUPV3L1, mitochondrial
[777]		P50516	2	3	3.2					68326.7	MOUSE	V-type proton ATPase catalytic subunit A
[778]		O88958	3	3	17					32549.6	MOUSE	Glucosamine-6-phosphate isomerase 1
[779]		Q91WM3	2	4	9.7					52107.5	MOUSE	U3 small nucleolar RNA-interacting protein 2
[780]		Q7TN89	2	3	7					24320.7	MOUSE	GTPase ERas
[781]		P54731	2	4	3.4					73863.7	MOUSE	FAS-associated factor 1
[782]		Q80TE0	4	4	3.2					155271	MOUSE	RNA polymerase II-associated protein 1
[783]		Q9CQU5	3	3	18.3					28713.1	MOUSE	ZW10 interactor
[784]		Q9CWQ0	2	2	11.4					31218.2	MOUSE	Diphthine synthase
[785]		Q922U1	4	4	7					77455.5	MOUSE	U4/U6 small nuclear ribonucleoprotein Prp3
[786]		Q9CWH6	2	2	14.8					27866.1	MOUSE	Proteasome subunit alpha type-7-like
[787]		Q9CZU3	3	3	6.3	5	5	0.261119	4.9	117638	MOUSE	Superkiller viralicidic activity 2-like 2
[788]		Q80UJ7	3	3	3.8					110198	MOUSE	Rab3 GTPase-activating protein catalytic subunit
[789]		Q8CCS6	1	2	5.6	2	2	0.435199	9.3	32296.8	MOUSE	Polyadenylate-binding protein 2
[790]		Q8BG51	3	3	5.9					72242.5	MOUSE	Mitochondrial Rho GTPase 1
[791]		Q8R0W0	3	3	0.6					724674	MOUSE	Epiplakin
[792]		Q6PD03	3	3	7.4					56347.5	MOUSE	Serine/threonine-protein phosphatase 2A 56 kDa regulatory subunit alpha isoform
[793]		P35700	3	5	16.6	5	7	0.310856	24.1	22176.7	MOUSE	Peroxiredoxin-1
[794]		Q8BWZ3	2	2	4.3	4	4	0.217599	3.5	111709	MOUSE	N-alpha-acetyltransferase 25, NatB auxiliary subunit
[795]		Q99L45	3	3	8.8	3	3	0.435199	9.1	38092.4	MOUSE	Eukaryotic translation initiation factor 2 subunit 2
[796]		P62305	2	2	39.1					10803.7	MOUSE	Small nuclear ribonucleoprotein E
[797]		Q8BQM4	3	3	5.7					74306.1	MOUSE	HEAT repeat-containing protein 3
[798]		P60824				3	3	0	12.8	18607.2	MOUSE	Cold-inducible RNA-binding protein
[799]		P61620	4	5	8.4					52265.2	MOUSE	Protein transport protein Sec61 subunit alpha isoform 1
[800]		Q9ESX5	3	4	10.8	2	3	0.580265	4.9	57402.1	MOUSE	H/ACA ribonucleoprotein complex subunit 4
[801]		Q9DCE5				4	4	0	10.2	42116.4	MOUSE	p21-activated protein kinase-interacting protein 1
[802]		Q7TN75	2	3	3.4					109850	MOUSE	Retrotransposon-derived protein PEG10
[803]		Q8BZM1	3	3	6.7					67756.2	MOUSE	Glomulin
[804]		Q9D824				2	2	0	5.7	64959.2	MOUSE	Pre-mRNA 3'-end-processing factor FIP1
[805]		Q505F5	4	4	10.7	3	3	0.580265	6.7	63590.8	MOUSE	Leucine-rich repeat-containing protein 47
[806]		Q9D0M3	4	4	16					35328	MOUSE	Cytochrome c1, heme protein, mitochondrial
[807]		Q7TPD0	2	2	4.7					117939	MOUSE	Integrator complex subunit 3
[808]		Q9Z2U1	3	3	15.8					26411.3	MOUSE	Proteasome subunit alpha type-5
[809]		Q8VD76	4	5	19.4					34244.3	MOUSE	General transcription factor IIH subunit 3
[810]		Q8R3P6	2	2	5					57237.2	MOUSE	von Willebrand factor A domain-containing protein 9
[811]		Q9JMH6	2	2	6.2					67084.4	MOUSE	Thioredoxin reductase 1, cytoplasmic
[812]		Q8BGQ7				3	3	0	3.3	106910	MOUSE	Alanine--tRNA ligase, cytoplasmic
[813]		Q3UEB3	2	2	9.4	2	2	0.435199	4.6	60249.4	MOUSE	Poly(U)-binding-splicing factor PUF60
[814]		Q5F2E7				4	6	0	8.2	75657.4	MOUSE	Nuclear fragile X mental retardation-interacting protein 2
[815]		Q8C5L3	2	3	7.2					59711.2	MOUSE	CCR4-NOT transcription complex subunit 2
[816]		Q9D9K3				2	2	0	7	37195.8	MOUSE	Cell death regulator Aven
[817]		Q9CQX2	2	2	33.6					16318.1	MOUSE	Cytochrome b5 type B
[818]		O08583	1	1	10.2	4	5	0.0870398	16.9	26940.2	MOUSE	THO complex subunit 4
[819]		O08915	2	2	9.4					37605.3	MOUSE	AH receptor-interacting protein
[820]		Q99LC3	2	5	9.3					40603.8	MOUSE	NADH dehydrogenase [ubiquinone] 1 alpha subcomplex subunit 10, mitochondrial
[821]		Q9JJT0	2	3	7.2					40841	MOUSE	RNA 3'-terminal phosphate cyclase-like protein
[822]		P97477	2	2	6.8					44772.4	MOUSE	Aurora kinase A
[823]		Q8VE37	2	2	8.1	2	2	0.435199	5.5	44931.4	MOUSE	Regulator of chromosome condensation
[824]		Q9CZ13	3	3	10.4					52852.2	MOUSE	Cytochrome b-c1 complex subunit 1, mitochondrial
[825]		Q8K2D3	2	2	4.1					55957.9	MOUSE	Enhancer of mRNA-decapping protein 3
[826]		P56183				3	3	0	6.3	54777.2	MOUSE	Ribosomal RNA processing protein 1 homolog A
[827]		Q8BMB3	3	3	13.9					28263.1	MOUSE	Eukaryotic translation initiation factor 4E type 2
[828]		Q61539	2	4	6					48328.5	MOUSE	Steroid hormone receptor ERR2
[829]		Q60809	2	2	10.2					32718.4	MOUSE	CCR4-NOT transcription complex subunit 7
[830]		Q9Z2A5	3	3	8.3					59146.9	MOUSE	Arginyl-tRNA--protein transferase 1
[831]		Q60520	4	4	3.3					145089	MOUSE	Paired amphipathic helix protein Sin3a
[832]		O88455	2	2	4					53919.2	MOUSE	7-dehydrocholesterol reductase
[833]		Q922L6	2	2	5.2					66276.2	MOUSE	Negative elongation factor D
[834]		Q6P3A8	2	5	9.5					42880.7	MOUSE	2-oxoisovalerate dehydrogenase subunit beta, mitochondrial
[835]		Q6NSQ7	1	2	4					54023.5	MOUSE	Protein LTV1 homolog
[836]		Q8BH83	2	2	7.7					35513.1	MOUSE	Ankyrin repeat domain-containing protein 9
[837]		Q9D7A8	2	3	17					31246.8	MOUSE	Armadillo repeat-containing protein 1
[838]		Q9D0D5	3	3	8.9	1	1	1.3056	3.6	49593.8	MOUSE	General transcription factor IIE subunit 1
[839]		Q99KN2	2	2	9.4					37633	MOUSE	Probable cytosolic iron-sulfur protein assembly protein CIAO1
[840]		Q8CI33				2	2	0	4.5	60194	MOUSE	CWF19-like protein 1
[841]		Q8K194				2	2	0	16.8	18885.4	MOUSE	U4/U6.U5 small nuclear ribonucleoprotein 27 kDa protein
[842]		Q9EPU4	2	3	2.4	2	2	0.652798	1.9	160820	MOUSE	Cleavage and polyadenylation specificity factor subunit 1
[843]		Q61029	2	2	7.7					50373.1	MOUSE	Lamina-associated polypeptide 2, isoforms beta/delta/epsilon/gamma
[844]		P59017	2	2	9.7					46719.8	MOUSE	Bcl-2-like protein 13
[845]		Q9DC16	2	2	11.4					32562.5	MOUSE	Endoplasmic reticulum-Golgi intermediate compartment protein 1
[846]		Q9ER00	2	2	11.3					31195.5	MOUSE	Syntaxin-12
[847]		Q8C6B9				2	2	0	22.4	15977.7	MOUSE	Active regulator of SIRT1
[848]		Q8K3Y3	3	3	20.6					22720.2	MOUSE	Protein lin-28 homolog A
[849]		Q6ZWU9	2	4	25					9461.2	MOUSE	40S ribosomal protein S27
[850]		P61750				3	4	0	10	20396.8	MOUSE	ADP-ribosylation factor 4
[850-1]	1	P61205	1	1	9.9	2	3	0.145066	6.1	20600.9	MOUSE	ADP-ribosylation factor 3
[850-2]	1	P84078	1	1	9.9	2	3	0.145066	6.1	20697	MOUSE	ADP-ribosylation factor 1
[851]		Q99JX7	1	3	1.9	3	3	0.435199	5.7	70300.1	MOUSE	Nuclear RNA export factor 1
[852]		P47955	2	3	37.7					11475	MOUSE	60S acidic ribosomal protein P1
[853]		Q921I2				2	2	0	4.5	64861	MOUSE	Kelch domain-containing protein 4
[854]		Q91VJ5				3	6	0	16.7	30597.7	MOUSE	Polyglutamine-binding protein 1
[855]		Q9JMG1				4	5	0	23.6	16368.8	MOUSE	Endothelial differentiation-related factor 1
[856]		P97363	2	2	5					62982.1	MOUSE	Serine palmitoyltransferase 2
[857]		P40124	1	1	4.6					51565.3	MOUSE	Adenylyl cyclase-associated protein 1
[858]		Q99PL5	1	1	1.1					172880	MOUSE	Ribosome-binding protein 1
[859]		O35638	2	2	2.1					141283	MOUSE	Cohesin subunit SA-2
[860]		Q80ZS3	1	2	9					23443.9	MOUSE	28S ribosomal protein S26, mitochondrial
[861]		P04184	2	2	7.7					25776.1	MOUSE	Thymidine kinase, cytosolic
[862]		O35382	1	1	1.6					110546	MOUSE	Exocyst complex component 4
[863]		Q80U93	2	2	1.2					212980	MOUSE	Nuclear pore complex protein Nup214
[864]		Q9D2N9	2	3	6.5					67555.3	MOUSE	Vacuolar protein sorting-associated protein 33A
[865]		Q99MV2	2	2	5.1					40401.4	MOUSE	Testis-expressed protein 19.1
[866]		Q8BMZ5	2	2	8.5					34196.7	MOUSE	tRNA-splicing endonuclease subunit Sen34
[867]		Q9Z315				3	3	0	4.7	90886.1	MOUSE	U4/U6.U5 tri-snRNP-associated protein 1
[868]		P39749				5	6	0	9	42315	MOUSE	Flap endonuclease 1
[869]		P0CG14				2	6	0	4.7	52244.9	MOUSE	Chromosome transmission fidelity protein 8 homolog isoform 2
[870]		P31154	1	1	4.5					38272.8	MOUSE	S-adenosylmethionine decarboxylase proenzyme 1
[871]		P08228				3	3	0	19.5	15942.8	MOUSE	Superoxide dismutase [Cu-Zn]
[872]		Q9CR62	2	2	14.6					34155.2	MOUSE	Mitochondrial 2-oxoglutarate/malate carrier protein
[873]		O89086				2	2	0	6.5	16604.8	MOUSE	Putative RNA-binding protein 3
[874]		Q8K2X3	3	3	9.8					43486.2	MOUSE	CST complex subunit STN1
[875]		Q8BFT2	3	3	8.5					42197	MOUSE	HAUS augmin-like complex subunit 4
[876]		P16254	1	1	13.6					12509.8	MOUSE	Signal recognition particle 14 kDa protein
[877]		P28352				3	4	0	9.5	35490.7	MOUSE	DNA-(apurinic or apyrimidinic site) lyase
[878]		Q80ZK0	1	1	9.4					18697.9	MOUSE	28S ribosomal protein S10, mitochondrial
[879]		Q8QZX2	2	2	5.3					66309	MOUSE	HAUS augmin-like complex subunit 3
[880]		Q9JLR9	1	2	23.2					10425.3	MOUSE	HIG1 domain family member 1A, mitochondrial
[881]		Q8BIW1	1	1	3.7					50240	MOUSE	Protein prune homolog
[882]		Q9CQ25	1	2	16.4					16524.1	MOUSE	Mitotic-spindle organizing protein 2
[883]		Q9CQ79	3	4	17.3					26260	MOUSE	Thioredoxin domain-containing protein 9
[884]		Q505D1	2	2	2.7					112899	MOUSE	Serine/threonine-protein phosphatase 6 regulatory ankyrin repeat subunit A
[885]		Q8BWU5	2	3	7.8					36301.1	MOUSE	Probable tRNA N6-adenosine threonylcarbamoyltransferase
[886]		P05064	2	2	7.4	3	3	0.290133	8	39356.3	MOUSE	Fructose-bisphosphate aldolase A
[887]		Q8VCH6	4	4	7.6					60112.8	MOUSE	Delta(24)-sterol reductase
[888]		P48432				2	5	0	9.1	34454.4	MOUSE	Transcription factor SOX-2
[889]		Q1PSW8	2	2	4.4					92055.2	MOUSE	E3 ubiquitin-protein ligase TRIM71
[890]		Q99N87	3	3	8.1					48206.9	MOUSE	28S ribosomal protein S5, mitochondrial
[891]		Q3V1T4	3	3	4.3					83651.9	MOUSE	Prolyl 3-hydroxylase 1
[892]		P54728	1	2	4.6					43513	MOUSE	UV excision repair protein RAD23 homolog B
[893]		P34022	3	3	15.3					23596.6	MOUSE	Ran-specific GTPase-activating protein
[894]		Q8BMK4	1	2	2.8					63692.6	MOUSE	Cytoskeleton-associated protein 4
[895]		Q9CQA3	2	2	9.6					31814.2	MOUSE	Succinate dehydrogenase [ubiquinone] iron-sulfur subunit, mitochondrial
[896]		Q9ESJ0	2	2	3.7					129980	MOUSE	Exportin-4
[897]		Q3V3R1				5	5	0	5.7	105730	MOUSE	Monofunctional C1-tetrahydrofolate synthase, mitochondrial
[898]		P60867	2	4	22.7	4	5	0.348159	33.6	13372.8	MOUSE	40S ribosomal protein S20
[899]		O70152	2	2	12.7					29174.9	MOUSE	Dolichol-phosphate mannosyltransferase subunit 1
[900]		O70310				2	2	0	5	56888.9	MOUSE	Glycylpeptide N-tetradecanoyltransferase 1
[901]		O08756	1	2	7.7					27418.9	MOUSE	3-hydroxyacyl-CoA dehydrogenase type-2
[902]		Q80WW9	1	2	5.4					35977.6	MOUSE	DDRGK domain-containing protein 1
[903]		Q9DB20	2	2	14.1	1	1	0.870398	5.2	23363.8	MOUSE	ATP synthase subunit O, mitochondrial
[904]		Q9CQQ7	2	2	9					28949.1	MOUSE	ATP synthase F(0) complex subunit B1, mitochondrial
[905]		Q8R3F9	2	2	3.5					94603.8	MOUSE	Speckle targeted PIP5K1A-regulated poly(A) polymerase
[906]		Q9CWR2	3	4	10.3					49126.7	MOUSE	Histone-lysine N-methyltransferase SMYD3
[907]		O54825	3	3	7.6					49784	MOUSE	Bystin
[908]		Q9D312				2	6	0	2.6	49034.5	MOUSE	Keratin, type I cytoskeletal 20
[909]		Q00PI9				2	2	0	3.2	84940.9	MOUSE	Heterogeneous nuclear ribonucleoprotein U-like protein 2
[910]		P14873	2	2	1.1					270257	MOUSE	Microtubule-associated protein 1B
[911]		Q8BUE4	2	2	10.5					40635.3	MOUSE	Apoptosis-inducing factor 2
[912]		A2AGT5	4	4	2.4					225637	MOUSE	Cytoskeleton-associated protein 5
[913]		P34884				3	4	0	18.3	12504.4	MOUSE	Macrophage migration inhibitory factor
[914]		Q9DBB8	2	2	6.6					36301.1	MOUSE	Trans-1,2-dihydrobenzene-1,2-diol dehydrogenase
[915]		Q810D6	2	2	9.6					49224.3	MOUSE	Glutamate-rich WD repeat-containing protein 1
[916]		Q9WUK2				3	3	0	11.3	27341.2	MOUSE	Eukaryotic translation initiation factor 4H
[917]		Q9JK23	2	2	8.3					33104.5	MOUSE	Proteasome assembly chaperone 1
[918]		Q9JLN9	3	3	1.4					288792	MOUSE	Serine/threonine-protein kinase mTOR
[919]		Q8K4F6	2	2	5.6					51030.1	MOUSE	Putative methyltransferase NSUN5
[920]		Q9CRB2				2	2	0	17	17247.3	MOUSE	H/ACA ribonucleoprotein complex subunit 2
[921]		Q9CX56	2	2	6.8					39930.6	MOUSE	26S proteasome non-ATPase regulatory subunit 8
[922]		O54956	2	2	7.8					59387.5	MOUSE	DNA polymerase epsilon subunit 2
[923]		Q9D289	1	2	12.7					17936.1	MOUSE	Trafficking protein particle complex subunit 6B
[924]		Q9CQ71	2	3	33.1					13583.9	MOUSE	Replication protein A 14 kDa subunit
[925]		Q9CWQ8	2	3	8.5					36575.2	MOUSE	GATS-like protein 3
[926]		Q9D1R9	3	3	20.5	3	10	0.13056	22.2	13293	MOUSE	60S ribosomal protein L34
[927]		Q9CZW4	1	1	2.5					80493.1	MOUSE	Long-chain-fatty-acid--CoA ligase 3
[928]		Q8BVE3	2	3	8.1					55855.5	MOUSE	V-type proton ATPase subunit H
[929]		Q61301	1	2	1.9					105287	MOUSE	Catenin alpha-2
[930]		Q8VDW0				3	3	0	6.3	49067.9	MOUSE	ATP-dependent RNA helicase DDX39A
[931]		Q9D0R4				1	1	0	2.6	61212.6	MOUSE	Probable ATP-dependent RNA helicase DDX56
[932]		Q8VC88	2	2	8.2					24663.1	MOUSE	Grancalcin
[933]		Q60848	2	2	3.2					95126.5	MOUSE	Lymphocyte-specific helicase
[934]		O35685	3	3	11.7	2	3	0.435199	6	38358.3	MOUSE	Nuclear migration protein nudC
[935]		Q01320	1	1	0.7	2	2	0.217599	1.3	172792	MOUSE	DNA topoisomerase 2-alpha
[936]		Q8C2P3	1	1	3.4					53512.2	MOUSE	tRNA-dihydrouridine(16/17) synthase [NAD(P)(+)]-like
[937]		P59280	1	1	2.4					69788.6	MOUSE	Kelch-like protein 8
[938]		Q7TQI3	3	3	15.9					31270.3	MOUSE	Ubiquitin thioesterase OTUB1
[939]		Q3V1V3				4	4	0	5	98049.1	MOUSE	ESF1 homolog
[940]		Q8BKH7	1	1	2.9					59009.2	MOUSE	Target of rapamycin complex 2 subunit MAPKAP1
[941]		Q9CZP5	1	2	4.5					47406.6	MOUSE	Mitochondrial chaperone BCS1
[942]		Q6PD26	1	2	3.8					61711.1	MOUSE	GPI transamidase component PIG-S
[943]		Q3THK3				2	2	0	5.1	57241.7	MOUSE	General transcription factor IIF subunit 1
[944]		Q04841				3	3	0	10.8	36472	MOUSE	DNA-3-methyladenine glycosylase
[945]		Q9D735				2	2	0	12.1	18376.7	MOUSE	Uncharacterized protein C19orf43 homolog
[946]		P59325				3	3	0	6.5	48968.8	MOUSE	Eukaryotic translation initiation factor 5
[947]		Q9ERR7	1	1	9.9					17806.7	MOUSE	15 kDa selenoprotein
[948]		Q5F2E8	3	3	3.3					116051	MOUSE	Serine/threonine-protein kinase TAO1
[949]		Q9EQ06	2	2	14.8					32880.9	MOUSE	Estradiol 17-beta-dehydrogenase 11
[950]		P10605	1	1	5.3					37280.2	MOUSE	Cathepsin B
[951]		Q9CWW6				1	1	0	9.2	13815	MOUSE	Peptidyl-prolyl cis-trans isomerase NIMA-interacting 4
[952]		Q9R0I7				4	6	0	3	155131	MOUSE	YLP motif-containing protein 1
[953]		Q99LR1	1	1	4.8					45270.2	MOUSE	Monoacylglycerol lipase ABHD12
[954]		Q9CQT1	1	1	4.3					39411.2	MOUSE	Methylthioribose-1-phosphate isomerase
[955]		Q9Z2I8	2	2	4.6					46840.4	MOUSE	Succinyl-CoA ligase [GDP-forming] subunit beta, mitochondrial
[956]		Q9CQC6	3	4	9.3					48043.6	MOUSE	Basic leucine zipper and W2 domain-containing protein 1
[956-1]	1	Q2L4X1	2	2	3.1	1	1	0.870398	2.1	48063.6	MUSMM	Basic leucine zipper and W2 domain-containing protein 2
[956-2]	1	Q91VK1	2	2	3.1	1	1	0.870398	2.1	48063.6	MOUSE	Basic leucine zipper and W2 domain-containing protein 2
[957]		Q91WQ3	1	1	3.4	3	3	0.145066	4.4	59105.9	MOUSE	Tyrosine--tRNA ligase, cytoplasmic
[958]		Q8K2V1	2	2	2.6					106299	MOUSE	Serine/threonine-protein phosphatase 4 regulatory subunit 1
[959]		Q9R0B9	2	2	3.3					84489.1	MOUSE	Procollagen-lysine,2-oxoglutarate 5-dioxygenase 2
[960]		Q9CPT5	1	2	9					21139.4	MOUSE	Nucleolar protein 16
[961]		Q61768				2	2	0	2.3	109552	MOUSE	Kinesin-1 heavy chain
[962]		Q07113	2	2	0.8					273818	MOUSE	Cation-independent mannose-6-phosphate receptor
[963]		P01942				2	5	0	14.8	15085.3	MOUSE	Hemoglobin subunit alpha
[964]		Q8VI36	1	1	3.4					64476.9	MOUSE	Paxillin
[965]		Q9D1C8	1	1	6.8					25452.4	MOUSE	Vacuolar protein sorting-associated protein 28 homolog
[966]		Q08288	2	2	7.2	1	1	0.870398	3.6	43735.9	MOUSE	Cell growth-regulating nucleolar protein
[967]		O70435	2	2	7.5					28405.5	MOUSE	Proteasome subunit alpha type-3
[968]		Q8C8M1	1	1	5.9					24829.6	MOUSE	Protein FAM60A
[969]		P08556	2	2	12.2					21199.3	MOUSE	GTPase NRas
[970]		Q99LM2	1	2	2.8					56991.3	MOUSE	CDK5 regulatory subunit-associated protein 3
[971]		Q9CPQ3	1	1	15.5					15536.9	MOUSE	Mitochondrial import receptor subunit TOM22 homolog
[972]		P53798	1	2	3.4					48154.8	MOUSE	Squalene synthase
[973]		Q3U9G9	2	2	5.9					71440.8	MOUSE	Lamin-B receptor
[974]		P09411				4	5	0	12.5	44550.9	MOUSE	Phosphoglycerate kinase 1
[975]		P27641	3	3	4.6					83057.7	MOUSE	X-ray repair cross-complementing protein 5
[976]		Q9DD02	2	2	11.2					21618.9	MOUSE	Protein Hikeshi
[977]		Q8CIM8	1	2	1.7					108194	MOUSE	Integrator complex subunit 4
[978]		Q9DCS9	1	1	8					21024	MOUSE	NADH dehydrogenase [ubiquinone] 1 beta subcomplex subunit 10
[979]		Q8VBT0	1	1	4.3					31396.1	MOUSE	Thioredoxin-related transmembrane protein 1
[980]		P24668	1	1	6.5					31172.7	MOUSE	Cation-dependent mannose-6-phosphate receptor
[981]		Q91YK2				2	2	0	3.6	80582.9	MOUSE	Ribosomal RNA processing protein 1 homolog B
[982]		Q8JZM7	2	2	5.1					60577.1	MOUSE	Parafibromin
[983]		Q9CWG8	1	1	5.7					48385	MOUSE	NADH dehydrogenase [ubiquinone] complex I, assembly factor 7
[984]		Q9D0J4	1	1	6.5					20864.1	MOUSE	ADP-ribosylation factor-like protein 2
[985]		Q9JJA4	1	2	5.9					47346.9	MOUSE	Ribosome biogenesis protein WDR12
[986]		P11404				2	5	0	14.3	14819	MOUSE	Fatty acid-binding protein, heart
[987]		Q62376	2	3	6	4	5	0.261119	7.8	51992.5	MOUSE	U1 small nuclear ribonucleoprotein 70 kDa
[988]		Q8R1Q8	1	1	3.6					56614.7	MOUSE	Cytoplasmic dynein 1 light intermediate chain 1
[989]		P59999				3	3	0	17.9	19667.2	MOUSE	Actin-related protein 2/3 complex subunit 4
[990]		Q9CWZ3				1	1	0	6.3	19888.2	MOUSE	RNA-binding protein 8A
[991]		Q64433				1	2	0	13.7	10962.8	MOUSE	10 kDa heat shock protein, mitochondrial
[992]		P40142	1	1	2.7	2	2	0.217599	4.3	67631.1	MOUSE	Transketolase
[993]		P10711				2	2	0	7.6	33880.8	MOUSE	Transcription elongation factor A protein 1
[994]		P15532				5	7	0	31.6	17208	MOUSE	Nucleoside diphosphate kinase A
[995]		P07724				1	8	0	2.1	68693.2	MOUSE	Serum albumin
[996]		A2AKG8				3	3	0	1.8	198952	MOUSE	Focadhesin
[997]		O08715	2	2	4.2					92195.5	MOUSE	A-kinase anchor protein 1, mitochondrial
[998]		Q91W43				3	3	0	3.7	113268	MOUSE	Glycine dehydrogenase (decarboxylating), mitochondrial
[999]		O55028	1	1	4.1					46587.9	MOUSE	[3-methyl-2-oxobutanoate dehydrogenase [lipoamide]] kinase, mitochondrial
[1000]		P19783	2	3	16.6	2	2	0.652798	13	19530.6	MOUSE	Cytochrome c oxidase subunit 4 isoform 1, mitochondrial
[1001]		Q91VD9	1	1	2.6					79777.6	MOUSE	NADH-ubiquinone oxidoreductase 75 kDa subunit, mitochondrial
[1002]		P02468	2	3	1.8					177300	MOUSE	Laminin subunit gamma-1
[1003]		O09005	1	1	5					38241.8	MOUSE	Sphingolipid delta(4)-desaturase DES1
[1004]		Q6ZWM4				2	2	0	19.8	10402.7	MOUSE	U6 snRNA-associated Sm-like protein LSm8
[1005]		Q9D6Y9	1	1	2.4					80364.4	MOUSE	1,4-alpha-glucan-branching enzyme
[1006]		Q62419	1	1	3.8					41518.5	MOUSE	Endophilin-A2
[1007]		Q9JIY5	2	3	10.9					49348.8	MOUSE	Serine protease HTRA2, mitochondrial
[1008]		Q3TXU5	1	3	5.4					40642.5	MOUSE	Deoxyhypusine synthase
[1009]		Q9CY21				1	1	0	5.7	31587.1	MOUSE	Ribosome biogenesis methyltransferase WBSCR22
[1010]		Q60793				1	1	0	4.1	51880.7	MOUSE	Krueppel-like factor 4
[1011]		Q4VC33	2	2	4.3					45336.8	MOUSE	Macrophage erythroblast attacher
[1012]		Q6NZB1	3	3	13					41866.8	MOUSE	Protein arginine N-methyltransferase 6
[1013]		Q8BU03	2	2	2.8					102911	MOUSE	Periodic tryptophan protein 2 homolog
[1014]		P27546				3	6	0	3	117430	MOUSE	Microtubule-associated protein 4
[1015]		Q9Z1M8				2	2	0	3.2	65616.8	MOUSE	Protein Red
[1016]		P61514	1	1	19.6					10275.4	MOUSE	60S ribosomal protein L37a
[1017]		Q8R4R6	1	1	4.6					34786	MOUSE	Nucleoporin NUP53
[1018]		Q62559	1	1	4.7					48248.5	MOUSE	Intraflagellar transport protein 52 homolog
[1019]		Q80UW2	1	1	4					33676.2	MOUSE	F-box only protein 2
[1020]		P20152	1	1	3					53688.1	MOUSE	Vimentin
[1021]		Q9CPP0	1	1	9.7					19023.6	MOUSE	Nucleoplasmin-3
[1022]		P17897	1	2	8.1					16794.4	MOUSE	Lysozyme C-1
[1023]		Q9WTX6	2	2	2.3					89692.3	MOUSE	Cullin-1
[1024]		O08740	1	1	15.4					13251.4	MOUSE	DNA-directed RNA polymerase II subunit RPB11
[1025]		Q99LD4	3	3	8.7					53442.6	MOUSE	COP9 signalosome complex subunit 1
[1026]		Q8K114	1	1	1.8					74078.5	MOUSE	Integrator complex subunit 9
[1027]		Q811U4	1	1	1.9					83726.6	MOUSE	Mitofusin-1
[1028]		Q3V1L4	1	2	3.9					64809.2	MOUSE	Cytosolic purine 5'-nucleotidase
[1029]		Q9CZU4	1	1	3					48187.3	MOUSE	GTPase Era, mitochondrial
[1030]		Q80U95	1	1	1.8					123977	MOUSE	Ubiquitin-protein ligase E3C
[1031]		Q8VH51	1	1	2.1	1	1	0.435199	2.8	59407.1	MOUSE	RNA-binding protein 39
[1032]		Q80UY1				2	2	0	6.3	46339.1	MOUSE	UPF0586 protein C9orf41 homolog
[1033]		Q9CXT6	1	1	4.6					47145.5	MOUSE	Lysine-specific demethylase 8
[1034]		P16110	4	4	19.3					27515.1	MOUSE	Galectin-3
[1035]		P98192	1	1	1.9					76870.4	MOUSE	Dihydroxyacetone phosphate acyltransferase
[1036]		Q8C1Y8	1	1	3.1					55505.2	MOUSE	Vacuolar fusion protein CCZ1 homolog
[1037]		Q8BVA5	1	3	6.4					37374.3	MOUSE	UPF0554 protein C2orf43 homolog
[1038]		Q99M31	1	2	5.7					54650.7	MOUSE	Heat shock 70 kDa protein 14
[1039]		Q3U4G3	1	1	4.8					43839	MOUSE	Xyloside xylosyltransferase 1
[1040]		B2RRE7	3	3	3.5	2	2	0.652798	2.1	123056	MOUSE	OTU domain-containing protein 4
[1041]		P62311				3	4	0	21.6	11845.5	MOUSE	U6 snRNA-associated Sm-like protein LSm3
[1042]		Q3V0C5	1	1	1.1					120632	MOUSE	Ubiquitin carboxyl-terminal hydrolase 48
[1043]		B2RY56				5	5	0	5.6	99552.7	MOUSE	RNA-binding protein 25
[1044]		Q9CR67	1	1	4.9					28031.4	MOUSE	Transmembrane protein 33
[1045]		Q6NZJ6	1	1	1.6	2	4	0.1088	1.6	176078	MOUSE	Eukaryotic translation initiation factor 4 gamma 1
[1046]		Q9QUM9	1	1	5.3					27372.7	MOUSE	Proteasome subunit alpha type-6
[1047]		Q8CHY3	1	2	1.5					75848.8	MOUSE	Dymeclin
[1048]		Q80XN0	2	2	11.1					38299.4	MOUSE	D-beta-hydroxybutyrate dehydrogenase, mitochondrial
[1049]		Q04447	1	1	4.5					42713.6	MOUSE	Creatine kinase B-type
[1050]		Q9D287	1	1	5.8					26131.7	MOUSE	Pre-mRNA-splicing factor SPF27
[1051]		Q9D5D8	1	1	2.4					56142.5	MOUSE	Chromodomain Y-like protein 2
[1052]		Q9D291	1	1	15.5					21434.3	MOUSE	Desumoylating isopeptidase 2
[1053]		P67871	1	1	7.9					24942.7	MOUSE	Casein kinase II subunit beta
[1054]		P47915	2	2	12.5	2	5	0.17408	12.5	17587.1	MOUSE	60S ribosomal protein L29
[1055]		Q9JHK4	1	1	3.4					64990.1	MOUSE	Geranylgeranyl transferase type-2 subunit alpha
[1056]		Q8BTY8	1	1	2.9					74751.3	MOUSE	Sec1 family domain-containing protein 2
[1057]		P63242				5	7	0	26.6	16832.4	MOUSE	Eukaryotic translation initiation factor 5A-1
[1058]		Q91ZR2	1	1	2.6					67904.8	MOUSE	Sorting nexin-18
[1059]		O08848	1	1	2.4					60124.4	MOUSE	60 kDa SS-A/Ro ribonucleoprotein
[1060]		P10639				1	2	0	12.4	11675.6	MOUSE	Thioredoxin
[1061]		O09012	2	2	4.7					70756.1	MOUSE	Peroxisomal targeting signal 1 receptor
[1062]		Q9DBA9	1	1	2.4					61851.9	MOUSE	General transcription factor IIH subunit 1
[1063]		P99027				1	1	0	10.4	11651	MOUSE	60S acidic ribosomal protein P2
[1064]		Q8CCP0	2	2	1.6					121189	MOUSE	Nuclear export mediator factor Nemf
[1065]		Q80Y17				1	1	0	1.2	112619	MOUSE	Lethal(2) giant larvae protein homolog 1
[1066]		P68181	1	1	3.4					40708.2	MOUSE	cAMP-dependent protein kinase catalytic subunit beta
[1067]		P52431	1	1	1.1	4	4	0.1088	4.3	123792	MOUSE	DNA polymerase delta catalytic subunit
[1068]		P11157	1	1	3.3					45096.1	MOUSE	Ribonucleoside-diphosphate reductase subunit M2
[1069]		Q9CXG3				1	1	0	2.8	57230.7	MOUSE	Peptidyl-prolyl cis-trans isomerase-like 4
[1070]		Q9CPS7	1	2	8.1					27453.8	MOUSE	RNA-binding protein PNO1
[1071]		Q8K4Q0	2	2	2.4					149473	MOUSE	Regulatory-associated protein of mTOR
[1072]		O70305				1	1	0	1.3	136486	MOUSE	Ataxin-2
[1073]		P62488	1	1	6.4					19294.5	MOUSE	DNA-directed RNA polymerase II subunit RPB7
[1074]		Q9R0H0	2	3	5.7					74649.4	MOUSE	Peroxisomal acyl-coenzyme A oxidase 1
[1075]		P97314				2	2	0	13	20926	MOUSE	Cysteine and glycine-rich protein 2
[1076]		Q61164	1	1	2.4					83746.3	MOUSE	Transcriptional repressor CTCF
[1077]		Q9D786	2	2	4.5					69572.6	MOUSE	HAUS augmin-like complex subunit 5
[1078]		Q641P0	1	2	2.6					47580.1	MOUSE	Actin-related protein 3B
[1079]		Q9R1P1	1	1	7.8					22965.1	MOUSE	Proteasome subunit beta type-3
[1080]		Q9JHW4	1	1	5.7					63539.3	MOUSE	Selenocysteine-specific elongation factor
[1081]		Q80XP8				3	3	0	7.7	38556.1	MOUSE	Protein FAM76B
[1082]		Q99KQ4	2	2	7.3					55447.3	MOUSE	Nicotinamide phosphoribosyltransferase
[1083]		Q3UQ84	1	1	1.4					81701	MOUSE	Threonine--tRNA ligase, mitochondrial
[1084]		Q99JN2	2	2	5.7					71687.5	MOUSE	Kelch-like protein 22
[1085]		Q6NZB0				6	6	0	17.4	29812.8	MOUSE	DnaJ homolog subfamily C member 8
[1086]		Q5SU73				3	4	0	5.3	61917.1	MOUSE	Coilin
[1087]		Q8BGP6	1	1	4.2					37963.9	MOUSE	Solute carrier family 25 member 40
[1088]		Q8VDS4	1	1	4.8					35701	MOUSE	Regulation of nuclear pre-mRNA domain-containing protein 1A
[1089]		Q8BHI7	1	1	4.3					35332.6	MOUSE	Elongation of very long chain fatty acids protein 5
[1090]		Q99J25	1	1	3.8					34843.8	MOUSE	rRNA methyltransferase 1, mitochondrial
[1091]		Q8C1D8				2	2	0	3.1	85249	MOUSE	Protein IWS1 homolog
[1092]		Q9ESW4	1	1	5.9					46976.4	MOUSE	Acylglycerol kinase, mitochondrial
[1093]		Q91VE6	1	1	7.6					36265.4	MOUSE	MKI67 FHA domain-interacting nucleolar phosphoprotein
[1094]		Q923Z3	1	2	2.1					74332.3	MOUSE	Protein MTO1 homolog, mitochondrial
[1095]		Q9DB05	1	1	8.5					33190	MOUSE	Alpha-soluble NSF attachment protein
[1096]		P19157	1	1	5.7					23609.4	MOUSE	Glutathione S-transferase P 1
[1097]		Q61187	1	1	3.1					44124	MOUSE	Tumor susceptibility gene 101 protein
[1098]		Q8K2T8	1	1	2.1					60518.8	MOUSE	RNA polymerase II-associated factor 1 homolog
[1099]		Q9D0I8	1	1	4.6					27545.9	MOUSE	mRNA turnover protein 4 homolog
[1100]		Q8R1J9	2	2	10.3					35897.6	MOUSE	Torsin-2A
[1101]		Q91YP3	1	1	3.8					34975.7	MOUSE	Putative deoxyribose-phosphate aldolase
[1102]		Q9QZH6	1	2	3.2					49799.4	MOUSE	Evolutionarily conserved signaling intermediate in Toll pathway, mitochondrial
[1103]		Q6P5B0	2	2	2					143132	MOUSE	RRP12-like protein
[1104]		Q9QUJ7	1	1	2.5					79077.7	MOUSE	Long-chain-fatty-acid--CoA ligase 4
[1105]		Q9R020				2	5	0	5.8	37350.7	MOUSE	Zinc finger Ran-binding domain-containing protein 2
[1106]		Q99NB8	1	2	3.9					63506.4	MOUSE	Ubiquilin-4
[1107]		P47964	2	2	12.4	2	5	0.17408	8.6	12215.6	MOUSE	60S ribosomal protein L36
[1108]		Q99KK2				2	2	0	4.9	48058.4	MOUSE	N-acylneuraminate cytidylyltransferase
[1109]		Q9D0P7				3	3	0	9.7	34706.8	MOUSE	Proline/serine-rich coiled-coil protein 1
[1110]		P61222	1	1	2.5					67315	MOUSE	ATP-binding cassette sub-family E member 1
[1111]		Q9CQ89	1	1	7.9					18865.2	MOUSE	Protein CutA
[1112]		Q9DBG7	1	1	1.6					69623.5	MOUSE	Signal recognition particle receptor subunit alpha
[1113]		Q61545				1	3	0	2.1	68462.8	MOUSE	RNA-binding protein EWS
[1114]		O09061	1	1	7.5					26372.4	MOUSE	Proteasome subunit beta type-1
[1115]		P29037	1	1	4.7					34709.4	MOUSE	TATA-box-binding protein
[1116]		Q8VEH6	1	2	5.6					43772.4	MOUSE	COBW domain-containing protein 1
[1117]		Q9EP97	1	1	2.1					64403.7	MOUSE	Sentrin-specific protease 3
[1118]		P61089				2	3	0	13.8	17138	MOUSE	Ubiquitin-conjugating enzyme E2 N
[1119]		P51949	1	2	7.1					35848.3	MOUSE	CDK-activating kinase assembly factor MAT1
[1120]		Q9QUI0	1	2	12.4					21782.4	MOUSE	Transforming protein RhoA
[1121]		Q9WVD5	1	1	5.3					32823.6	MOUSE	Mitochondrial ornithine transporter 1
[1122]		P61327				1	1	0	7.5	17163.8	MOUSE	Protein mago nashi homolog
[1123]		Q8VC31				1	1	0	2.2	61445.9	MOUSE	Coiled-coil domain-containing protein 9
[1124]		Q8BV13	1	2	7.6					29689.3	MOUSE	COP9 signalosome complex subunit 7b
[1125]		Q99N96	1	1	6.3					37597	MOUSE	39S ribosomal protein L1, mitochondrial
[1126]		O54946	1	1	3.6					39807.6	MOUSE	DnaJ homolog subfamily B member 6
[1127]		Q9EQ80	1	2	3.5					41746.3	MOUSE	Putative GTP cyclohydrolase 1 type 2 Nif3l1
[1128]		Q9JIK9	2	2	7.3					25826.9	MOUSE	28S ribosomal protein S34, mitochondrial
[1129]		Q8VE80	1	1	2.8					38738	MOUSE	THO complex subunit 3
[1130]		Q07646	1	3	5.4					38907.5	MOUSE	Mesoderm-specific transcript protein
[1131]		Q920E5	1	1	4.2					40581.9	MOUSE	Farnesyl pyrophosphate synthase
[1132]		P70261	1	1	1.5					96740.8	MOUSE	Paladin
[1133]		P03995				1	4	0	2.6	49900.4	MOUSE	Glial fibrillary acidic protein
[1134]		P60766	1	2	8.9					21258.8	MOUSE	Cell division control protein 42 homolog
[1135]		Q8C156	1	2	3.4					82303.3	MOUSE	Condensin complex subunit 2
[1136]		Q8R332	1	1	3.4					59445.7	MOUSE	Nucleoporin p58/p45
[1137]		P14152				2	3	0	6.6	36511.5	MOUSE	Malate dehydrogenase, cytoplasmic
[1138]		Q8BWW4	1	1	1.8	1	1	0.435199	1.1	79764.1	MOUSE	La-related protein 4
[1139]		Q6PAV2	2	2	2.9					118413	MOUSE	Probable E3 ubiquitin-protein ligase HERC4
[1140]		Q923W1	2	2	2.5					96791.1	MOUSE	Trimethylguanosine synthase
[1141]		Q99ME9	1	1	1.6					74113.4	MOUSE	Nucleolar GTP-binding protein 1
[1142]		Q8CCJ3	1	1	2.9					89520.9	MOUSE	E3 UFM1-protein ligase 1
[1143]		Q8R5H1	1	1	3					112326	MOUSE	Ubiquitin carboxyl-terminal hydrolase 15
[1144]		Q99KS6	1	1	8.2					38948.1	MOUSE	Manganese-dependent ADP-ribose/CDP-alcohol diphosphatase
[1145]		Q8BH15	1	1	1.6					81818.9	MOUSE	CCR4-NOT transcription complex subunit 10
[1146]		Q8VE73	2	2	1.4					192294	MOUSE	Cullin-7
[1147]		Q8R2K4	1	2	2.6					67236.3	MOUSE	TAF6-like RNA polymerase II p300/CBP-associated factor-associated factor 65 kDa subunit 6L
[1148]		P35293				2	2	0	10.7	23035.4	MOUSE	Ras-related protein Rab-18
[1149]		Q9DB29	1	1	4.8					27974.5	MOUSE	Isoamyl acetate-hydrolyzing esterase 1 homolog
[1150]		Q9CZA6	1	1	3.5					38523.1	MOUSE	Nuclear distribution protein nudE homolog 1
[1151]		P62331				3	3	0	12.6	20082.3	MOUSE	ADP-ribosylation factor 6
[1152]		Q5SF07	1	1	2.4					65584.4	MOUSE	Insulin-like growth factor 2 mRNA-binding protein 2
[1153]		O08784				2	4	0	1.6	135002	MOUSE	Treacle protein
[1154]		Q9DCG9				1	1	0	10.4	14141.4	MOUSE	tRNA methyltransferase 112 homolog
[1155]		Q64152				2	3	0	12.7	22031	MOUSE	Transcription factor BTF3
[1156]		Q3UBZ5	1	1	6.3					25493.5	MOUSE	MIF4G domain-containing protein
[1157]		Q9D2C6	1	1	7.4					22948.1	MOUSE	DNA-directed RNA polymerase III subunit RPC8
[1158]		Q8R105	1	2	5.4					38452.9	MOUSE	Vacuolar protein sorting-associated protein 37C
[1159]		P58043	1	1	2.7					54377.1	MOUSE	Sestrin-2
[1160]		P97765	2	2	6.1					28032.3	MOUSE	WW domain-binding protein 2
[1161]		Q9CXI5				1	1	0	7.8	20373.9	MOUSE	Mesencephalic astrocyte-derived neurotrophic factor
[1162]		Q8CIB5	1	1	4.1					77801.1	MOUSE	Fermitin family homolog 2
[1163]		Q9QZB7	1	1	4.3					46208.3	MOUSE	Actin-related protein 10
[1164]		Q8BJ03	1	1	4.4					45853.3	MOUSE	Cytochrome c oxidase assembly protein COX15 homolog
[1165]		Q9R0P5				1	1	0	6.7	18521.8	MOUSE	Destrin
[1166]		Q9D136	1	1	7.9					35385.1	MOUSE	2-oxoglutarate and iron-dependent oxygenase domain-containing protein 3
[1167]		Q99KJ0	1	1	5.4					29197.2	MOUSE	UBX domain-containing protein 2A
[1168]		Q8BG81				3	3	0	7.6	46132.9	MOUSE	Polymerase delta-interacting protein 3
[1169]		P56546	3	3	9.4					48957.3	MOUSE	C-terminal-binding protein 2
[1170]		Q6PDM2				2	2	0	8.5	27744.8	MOUSE	Serine/arginine-rich splicing factor 1
[1171]		Q3TFD2	1	1	4.5					59744.5	MOUSE	Lysophosphatidylcholine acyltransferase 1
[1172]		Q8C436	1	1	7.9					25535.5	MOUSE	Protein-lysine methyltransferase METTL21D
[1173]		Q9D710	1	2	5.4					33942.9	MOUSE	Thioredoxin-related transmembrane protein 2
[1174]		Q8CJ53	2	2	5.1					68489.9	MOUSE	Cdc42-interacting protein 4
[1175]		Q99KG3	1	1	2.9					103494	MOUSE	RNA-binding protein 10
[1176]		Q8K1Z0	2	2	6.1					35082.9	MOUSE	Ubiquinone biosynthesis protein COQ9, mitochondrial
[1177]		Q9CWH5	1	1	3.3					52904.9	MOUSE	tRNA (guanine(10)-N2)-methyltransferase homolog
[1178]		P70388				3	3	0	2.2	153489	MOUSE	DNA repair protein RAD50
[1179]		P26039				2	2	0	0.8	269824	MOUSE	Talin-1
[1180]		Q62093				3	3	0	14.5	25476.5	MOUSE	Serine/arginine-rich splicing factor 2
[1181]		Q3UMQ8	1	1	3.3					53246.4	MOUSE	H/ACA ribonucleoprotein complex non-core subunit NAF1
[1182]		Q921H9	1	1	4.3					25617.2	MOUSE	Cytochrome c oxidase assembly factor 7
[1183]		Q6P2K6	1	1	2.3					93843.3	MOUSE	Serine/threonine-protein phosphatase 4 regulatory subunit 3A
[1184]		Q9JJI8	1	2	17.1					8203.9	MOUSE	60S ribosomal protein L38
[1185]		Q99JR1	2	2	6.5					35649.7	MOUSE	Sideroflexin-1
[1186]		P08249				4	5	0	12.4	35611.8	MOUSE	Malate dehydrogenase, mitochondrial
[1187]		Q80U38	1	1	2.7					74565.8	MOUSE	Protein KHNYN
[1188]		Q9WUE4	1	2	4.5					43644.8	MOUSE	Nitrogen permease regulator 2-like protein
[1189]		Q9CRD0	1	1	7.3					27610.4	MOUSE	OCIA domain-containing protein 1
[1190]		Q8K4P0				2	3	0	1.4	145268	MOUSE	pre-mRNA 3' end processing protein WDR33
[1191]		P29391	1	1	8.7	1	1	0.435199	7.1	20802.6	MOUSE	Ferritin light chain 1
[1192]		P84091	1	1	4.6					49655.1	MOUSE	AP-2 complex subunit mu
[1193]		Q9CZU6	1	1	2.4					51737.1	MOUSE	Citrate synthase, mitochondrial
[1194]		Q8BMP6	2	2	5.9					60181.3	MOUSE	Golgi resident protein GCP60
[1195]		Q9D483	1	1	3.2					60706.5	MOUSE	DNA-directed RNA polymerase III subunit RPC3
[1196]		Q8K363				1	1	0	1.8	74181.5	MOUSE	ATP-dependent RNA helicase DDX18
[1197]		Q5SUQ9	2	2	3.3					134030	MOUSE	CST complex subunit CTC1
[1198]		Q8BNV1	1	1	1.7					63302	MOUSE	tRNA (uracil-5-)-methyltransferase homolog A
[1199]		A2A5R2	1	1	0.6					202242	MOUSE	Brefeldin A-inhibited guanine nucleotide-exchange protein 2
[1200]		Q9DCU6	1	1	5.4					33073.4	MOUSE	39S ribosomal protein L4, mitochondrial
[1201]		Q9D826	1	1	3.6					43847	MOUSE	Peroxisomal sarcosine oxidase
[1202]		O55101	1	1	4.5					24778.2	MOUSE	Synaptogyrin-2
[1203]		P11928	1	1	3					42428.9	MOUSE	2'-5'-oligoadenylate synthase 1A
[1204]		Q61598				1	1	0	2.5	50537.6	MOUSE	Rab GDP dissociation inhibitor beta
[1205]		P00405	1	1	4.4					25976.7	MOUSE	Cytochrome c oxidase subunit 2
[1206]		Q8BQX5	1	1	5.9					54915.6	MOUSE	Transmembrane and coiled-coil domain-containing protein 6
[1207]		Q8BRF7	1	1	3.3					72323.5	MOUSE	Sec1 family domain-containing protein 1
[1208]		Q8BIG7	1	2	6.1					28961.1	MOUSE	Catechol O-methyltransferase domain-containing protein 1
[1209]		Q9R0M6	1	1	5.5					22909.9	MOUSE	Ras-related protein Rab-9A
[1210]		Q8VBV7	2	2	18.7					23255.8	MOUSE	COP9 signalosome complex subunit 8
[1211]		Q6PD19	1	1	1.9					78633	MOUSE	UPF0668 protein C10orf76 homolog
[1212]		Q9CPU0	1	1	4.9					20809.8	MOUSE	Lactoylglutathione lyase
[1213]		Q60598	1	1	2.4					61250.2	MOUSE	Src substrate cortactin
[1214]		Q99J95	2	2	4.6					42762	MOUSE	Cyclin-dependent kinase 9
[1215]		O70422	2	2	8.6					52224.9	MOUSE	General transcription factor IIH subunit 4
[1216]		Q00547				1	1	0	1.1	91786.2	MOUSE	Hyaluronan mediated motility receptor
[1217]		Q8BGT7				1	1	0	5	26753.4	MOUSE	Survival of motor neuron-related-splicing factor 30
[1218]		P15105	1	1	2.9					42120.1	MOUSE	Glutamine synthetase
[1219]		Q9D0R2	1	1	1.4					83356.7	MOUSE	Threonine--tRNA ligase, cytoplasmic
[1220]		Q00558	1	1	3.4					40490	MOUSE	Factor VIII intron 22 protein
[1221]		Q8BNU0	1	1	4.7					50683.7	MOUSE	Armadillo repeat-containing protein 6
[1222]		Q8BL97				3	16	0	11.2	30817.8	MOUSE	Serine/arginine-rich splicing factor 7
[1223]		Q8BPA8	1	1	5.4					23034.7	MOUSE	Protein DPCD
[1224]		Q91YT0	3	3	9.3					50834.7	MOUSE	NADH dehydrogenase [ubiquinone] flavoprotein 1, mitochondrial
[1225]		Q925I1	2	2	4.9					66742.5	MOUSE	ATPase family AAA domain-containing protein 3
[1226]		P70349				1	1	0	11.1	13777	MOUSE	Histidine triad nucleotide-binding protein 1
[1227]		Q8BHS3				1	1	0	2.6	46896	MOUSE	Pre-mRNA-splicing factor RBM22
[1228]		P16330	1	1	3.1					47123.7	MOUSE	2',3'-cyclic-nucleotide 3'-phosphodiesterase
[1229]		Q80YR5				2	2	0	3.4	111839	MOUSE	Scaffold attachment factor B2
[1229-1]	1	D3YXK2				2	2	0	1.8	105104	MOUSE	Scaffold attachment factor B1
[1230]		Q91YD9				3	3	0	4.8	54274.7	MOUSE	Neural Wiskott-Aldrich syndrome protein
[1231]		Q99L85	2	2	7.3					33498.1	MOUSE	Elongator complex protein 5
[1232]		Q99J47	1	1	2.8					34987	MOUSE	Dehydrogenase/reductase SDR family member 7B
[1233]		Q9CY73	1	2	5.4					37527.6	MOUSE	39S ribosomal protein L44, mitochondrial
[1234]		Q9EQR6	1	1	2.7					68506.2	MOUSE	Fanconi anemia group G protein homolog
[1235]		Q9DCD2	1	1	2.9					99988.4	MOUSE	Pre-mRNA-splicing factor SYF1
[1236]		Q8C5Q4	1	1	4.6					53076.8	MOUSE	G-rich sequence factor 1
[1237]		Q9CY27	3	4	10.7					36090.8	MOUSE	Very-long-chain enoyl-CoA reductase
[1238]		P97865	1	1	4.4					35502.2	MOUSE	Peroxisomal targeting signal 2 receptor
[1239]		Q6PEB6	1	1	9.8					26032.7	MOUSE	MOB-like protein phocein
[1240]		Q66GT5	1	1	6.7					21942.7	MOUSE	Phosphatidylglycerophosphatase and protein-tyrosine phosphatase 1
[1241]		Q810B6	1	1	0.9					128654	MOUSE	Ankyrin repeat and FYVE domain-containing protein 1
[1242]		Q80XL6	1	1	1.3					87367.2	MOUSE	Acyl-CoA dehydrogenase family member 11
[1243]		P51569	2	2	4.5					47643.1	MOUSE	Alpha-galactosidase A
[1244]		Q80Y81				1	1	0	1.3	92720.2	MOUSE	Zinc phosphodiesterase ELAC protein 2
[1245]		Q61166	1	1	7.5	2	2	0.217599	6.3	30016.5	MOUSE	Microtubule-associated protein RP/EB family member 1
[1246]		Q14C51	1	1	1.2					77796.9	MOUSE	Pentatricopeptide repeat domain-containing protein 3, mitochondrial
[1247]		Q9CXT8	1	1	5.9					54615	MOUSE	Mitochondrial-processing peptidase subunit beta
[1248]		Q9WTI7	1	1	1					121945	MOUSE	Unconventional myosin-Ic
[1249]		P28660	1	1	1.2					128785	MOUSE	Nck-associated protein 1
[1250]		Q9CWV4	1	1	6.3					40893.7	MOUSE	Melanoma-associated antigen B16
[1251]		P83510				2	2	0	2.5	150368	MOUSE	Traf2 and NCK-interacting protein kinase
[1252]		Q8BJU0	1	1	4.4					34322.7	MOUSE	Small glutamine-rich tetratricopeptide repeat-containing protein alpha
[1253]		Q9QYF1	1	1	2.5					35148.1	MOUSE	Retinol dehydrogenase 11
[1254]		Q7TSZ8	1	2	4.7					56537.3	MOUSE	Nucleus accumbens-associated protein 1
[1255]		Q8R307	1	1	1.8					110220	MOUSE	Vacuolar protein sorting-associated protein 18 homolog
[1256]		E9Q555	1	1	0.2					584505	MOUSE	E3 ubiquitin-protein ligase RNF213
[1257]		Q5SW19	1	1	0.7					148070	MOUSE	Clustered mitochondria protein homolog
[1258]		Q9DB34				1	1	0	4.1	25134.2	MOUSE	Charged multivesicular body protein 2a
[1259]		Q6PR54	1	1	0.5					266230	MOUSE	Telomere-associated protein RIF1
[1260]		Q9CZP7	2	2	8.1					38439.6	MOUSE	Hsp90 co-chaperone Cdc37-like 1
[1261]		P02301	2	2	11.8	3	10	0.0870398	16.9	15315	MOUSE	Histone H3.3C
[1262]		P56873	2	2	9					21336.2	MOUSE	Sjoegren syndrome/scleroderma autoantigen 1 homolog
[1263]		Q9D011				1	1	0	14	19060	MOUSE	M-phase-specific PLK1-interacting protein
[1264]		B1AZI6	1	1	0.9					182775	MOUSE	THO complex subunit 2
[1265]		Q61249	1	1	3.5					38971.2	MOUSE	Immunoglobulin-binding protein 1
[1266]		P51807	2	2	35.4					12483.2	MOUSE	Dynein light chain Tctex-type 1
[1267]		Q8C5L6	1	1	3.2					54159.4	MOUSE	Inositol polyphosphate 5-phosphatase K
[1268]		Q80WQ2	1	1	2					88048.4	MOUSE	Protein VAC14 homolog
[1269]		Q9CRC8	1	1	2.7					68076.2	MOUSE	Leucine-rich repeat-containing protein 40
[1270]		Q68ED3	1	1	3					69704.8	MOUSE	Non-canonical poly(A) RNA polymerase PAPD5
[1271]		Q8BGA9	1	1	2.1					48220	MOUSE	Mitochondrial inner membrane protein OXA1L
[1272]		P07356				1	1	0	3.2	38676.5	MOUSE	Annexin A2
[1273]		P47753	1	1	3.5					32940	MOUSE	F-actin-capping protein subunit alpha-1
[1274]		Q8C7V3				1	1	0	3.4	59375.5	MOUSE	U3 small nucleolar RNA-associated protein 15 homolog
[1275]		Q91VU0	1	1	7.5					24752.9	MOUSE	Protein FAM3C
[1276]		P33611	1	1	2.2					66214.7	MOUSE	DNA polymerase alpha subunit B
[1277]		P70423	1	1	1.6					67460.6	MOUSE	Cationic amino acid transporter 3
[1278]		Q8CGZ0				3	4	0	2.5	106170	MOUSE	Calcium homeostasis endoplasmic reticulum protein
[1279]		Q61235	1	1	1.7					56382.2	MOUSE	Beta-2-syntrophin
[1280]		Q33DR3	1	1	6.2					43980.7	MOUSE	Decaprenyl-diphosphate synthase subunit 2
[1281]		Q6P069	1	1	5.6	1	1	0.435199	5.6	21627.5	MOUSE	Sorcin
[1282]		Q9CR80				2	2	0	17	13215.6	MOUSE	Protein FAM32A
[1283]		Q8C052				1	1	0	1.1	102940	MOUSE	Microtubule-associated protein 1S
[1284]		Q6ZPR5	1	1	1.1					93276.7	MOUSE	Sphingomyelin phosphodiesterase 4
[1285]		P84089				1	1	0	11.5	12259.1	MOUSE	Enhancer of rudimentary homolog
[1286]		Q9JI11	1	1	3.3					55541.6	MOUSE	Serine/threonine-protein kinase 4
[1287]		P10833	1	1	5					23764	MOUSE	Ras-related protein R-Ras
[1288]		P58468	1	1	7.3					24814	MOUSE	Protein FAM207A
[1289]		Q9JJY4	1	1	3.2					91711	MOUSE	Probable ATP-dependent RNA helicase DDX20
[1290]		P56135				1	1	0	13.6	10344.3	MOUSE	ATP synthase subunit f, mitochondrial
[1291]		Q3TIV5				2	2	0	3.8	48327.6	MOUSE	Zinc finger CCCH domain-containing protein 15
[1292]		O70311				2	2	0	4.5	60484.8	MOUSE	Glycylpeptide N-tetradecanoyltransferase 2
[1293]		Q9CQA1	1	1	14.4					20795.3	MOUSE	Trafficking protein particle complex subunit 5
[1294]		A2BH40	2	2	1.4					242094	MOUSE	AT-rich interactive domain-containing protein 1A
[1295]		Q9R1P4	1	1	4.2					29546.8	MOUSE	Proteasome subunit alpha type-1
[1296]		P22892	1	2	2.9					91351.3	MOUSE	AP-1 complex subunit gamma-1
[1297]		P54726	1	1	8.3					39706.8	MOUSE	UV excision repair protein RAD23 homolog A
[1298]		P61957				1	2	0	12.6	10871.3	MOUSE	Small ubiquitin-related modifier 2
[1299]		Q9CWR8	1	1	1.9					47993.2	MOUSE	DNA (cytosine-5)-methyltransferase 3-like
[1300]		P59470	3	3	2.3					127716	MOUSE	DNA-directed RNA polymerase III subunit RPC2
[1301]		Q9Z120	1	1	5.6					30603.4	MOUSE	tRNA (guanine-N(7)-)-methyltransferase
[1302]		P24788				1	1	0	1.1	91514.2	MOUSE	Cyclin-dependent kinase 11B
[1303]		Q63850	2	2	9.9					53255.1	MOUSE	Nuclear pore glycoprotein p62
[1304]		Q8R349	1	1	1.3					71460.9	MOUSE	Cell division cycle protein 16 homolog
[1305]		Q8R3C0	1	1	1.1					72891.6	MOUSE	Mini-chromosome maintenance complex-binding protein
[1306]		Q9EQC5	1	1	4.6					89160.5	MOUSE	N-terminal kinase-like protein
[1307]		Q9CXK9				2	2	0	2.7	137326	MOUSE	RNA-binding protein 33
[1308]		P07742	2	2	5.3					90211.1	MOUSE	Ribonucleoside-diphosphate reductase large subunit
[1309]		Q3UJB9	1	1	1.3					152485	MOUSE	Enhancer of mRNA-decapping protein 4
[1310]		Q8R3N1	1	1	3					98770.3	MOUSE	Nucleolar protein 14
[1311]		P18608				1	1	0	9.4	10152.5	MOUSE	Non-histone chromosomal protein HMG-14
[1312]		Q3U3W5				1	1	0	0.9	94221	MOUSE	Putative protein arginine N-methyltransferase 9
[1313]		Q9D2V5	1	1	5.2					43408.4	MOUSE	Protein AAR2 homolog
[1314]		Q8C163	1	1	5.4					41384.1	MOUSE	Nuclease EXOG, mitochondrial
[1315]		Q8K2M0	1	1	1.8					45030.3	MOUSE	39S ribosomal protein L38, mitochondrial
[1316]		Q4VA53	1	1	1.1					164420	MOUSE	Sister chromatid cohesion protein PDS5 homolog B
[1317]		Q8CJ40				1	1	0	0.4	226946	MOUSE	Rootletin
[1318]		Q9DB25	1	1	4					36791.3	MOUSE	Dolichyl-phosphate beta-glucosyltransferase
[1319]		Q6PAR5	1	1	1.1					162404	MOUSE	GTPase-activating protein and VPS9 domain-containing protein 1
[1320]		Q3U108	2	3	4.1					63899	MOUSE	AT-rich interactive domain-containing protein 5A
[1321]		Q6GQT9	1	1	0.9					133421	MOUSE	Nodal modulator 1
[1322]		O35387	1	1	2.9					31654.6	MOUSE	HCLS1-associated protein X-1
[1323]		Q810A7				1	1	0	1.4	101966	MOUSE	ATP-dependent RNA helicase DDX42
[1324]		Q9CQJ2	1	1	2.8					32208.8	MOUSE	PIH1 domain-containing protein 1
[1325]		Q60996	1	1	3.2					60825	MOUSE	Serine/threonine-protein phosphatase 2A 56 kDa regulatory subunit gamma isoform
[1326]		Q8C4Y3	1	1	3.6					65636.9	MOUSE	Negative elongation factor B
[1327]		P53811	1	1	4.8					31487.3	MOUSE	Phosphatidylinositol transfer protein beta isoform
[1328]		Q8CC88	1	1	0.6					213423	MOUSE	von Willebrand factor A domain-containing protein 8
[1329]		Q6PAM0	1	1	3.7					30209.4	MOUSE	5'-AMP-activated protein kinase subunit beta-2
[1330]		Q9JMD0				1	1	0	2.6	52793.4	MOUSE	BUB3-interacting and GLEBS motif-containing protein ZNF207
[1331]		P12787				2	2	0	10.3	16101.6	MOUSE	Cytochrome c oxidase subunit 5A, mitochondrial
[1332]		Q8K296	3	3	3.2					133841	MOUSE	Myotubularin-related protein 3
[1333]		P54923	1	1	5					40068.7	MOUSE	[Protein ADP-ribosylarginine] hydrolase
[1334]		Q8BLF1	1	1	6.9					45740	MOUSE	Neutral cholesterol ester hydrolase 1
[1335]		Q922R5	1	1	2.3					93935	MOUSE	Serine/threonine-protein phosphatase 4 regulatory subunit 3B
[1336]		Q9WVK0	1	1	24.8					17525.4	MOUSE	Type-1 angiotensin II receptor-associated protein
[1337]		Q91WD5	1	1	3.7					52626.2	MOUSE	NADH dehydrogenase [ubiquinone] iron-sulfur protein 2, mitochondrial
[1338]		Q9ER39	1	1	4.5					37830.2	MOUSE	Torsin-1A
[1339]		O55242	1	1	5.8					25250.1	MOUSE	Sigma non-opioid intracellular receptor 1
[1340]		Q6ZQ88	1	1	2.3					92851.4	MOUSE	Lysine-specific histone demethylase 1A
[1341]		Q3UPH1	1	1	6.5					46298	MOUSE	Protein PRRC1
[1342]		P97473	1	1	2.2					38842.3	MOUSE	RISC-loading complex subunit TARBP2
[1343]		Q9JHR7				1	1	0	1.1	117773	MOUSE	Insulin-degrading enzyme
[1344]		Q9R1P0	1	1	3.1					29471	MOUSE	Proteasome subunit alpha type-4
[1345]		O08585	2	2	7.2					25604.3	MOUSE	Clathrin light chain A
[1346]		Q6PB97				1	1	0	1.8	73788.5	MOUSE	F-box/LRR-repeat protein 19
[1347]		Q9QZM0	1	1	3.3					67351.6	MOUSE	Ubiquilin-2
[1348]		Q91Z38	1	1	3.4					33263.2	MOUSE	Tetratricopeptide repeat protein 1
[1349]		Q9WV55	1	1	5.6					27855.5	MOUSE	Vesicle-associated membrane protein-associated protein A
[1350]		Q5SVQ0	1	1	3.9					70642.1	MOUSE	Histone acetyltransferase KAT7
[1351]		P97772	1	1	0.6					133214	MOUSE	Metabotropic glutamate receptor 1
[1352]		Q99LJ2	1	1	4.2					54058.3	MOUSE	Ankyrin repeat and BTB/POZ domain-containing protein 1
[1353]		Q9JMA2	1	1	3.5					44093.3	MOUSE	Queuine tRNA-ribosyltransferase
[1354]		P46467	1	1	5.2					49419.7	MOUSE	Vacuolar protein sorting-associated protein 4B
[1355]		Q61464				1	1	0	0.7	218136	MOUSE	Zinc finger protein 638
[1356]		Q9JJF3	1	1	3					67557.3	MOUSE	Bifunctional lysine-specific demethylase and histidyl-hydroxylase NO66
[1357]		Q9Z2Q5				2	2	0	12.1	24301.2	MOUSE	39S ribosomal protein L40, mitochondrial
[1358]		Q5NCS9	1	1	4.2					49624.6	MOUSE	Mitochondrial dynamics protein MID49
[1359]		O70572	1	1	2.9					47467	MOUSE	Sphingomyelin phosphodiesterase 2
[1360]		Q9DBC7	1	1	2.1					43185.5	MOUSE	cAMP-dependent protein kinase type I-alpha regulatory subunit
[1361]		Q8R3H9	1	1	2.6					44339.3	MOUSE	Tetratricopeptide repeat protein 4
[1362]		Q9EQ61				1	1	0	1.5	67796.1	MOUSE	Pescadillo homolog
[1363]		Q8K0D5	1	1	3.9					83550.3	MOUSE	Elongation factor G, mitochondrial
[1364]		Q5H8C4				1	1	0	0.3	359404	MOUSE	Vacuolar protein sorting-associated protein 13A
[1365]		Q9QZ08	1	1	5.8					37268.8	MOUSE	N-acetyl-D-glucosamine kinase
[1366]		Q03147	1	1	2.3					38968.6	MOUSE	Cyclin-dependent kinase 7
[1367]		O55142	3	3	20					12553.8	MOUSE	60S ribosomal protein L35a
[1368]		P52624	1	1	7.1					34086.5	MOUSE	Uridine phosphorylase 1
[1369]		A2BDX3	1	1	2					49375.5	MOUSE	Adenylyltransferase and sulfurtransferase MOCS3
[1370]		P51432				1	1	0	0.7	139488	MOUSE	1-phosphatidylinositol 4,5-bisphosphate phosphodiesterase beta-3
[1372]		Q8VEH3				1	1	0	4.8	21390.1	MOUSE	ADP-ribosylation factor-like protein 8A
[1373]		D3Z5T1	1	2	4.8					49472	MOUSE	Coiled-coil domain-containing protein 78
[1374]		P97801	1	1	9.4					31254.4	MOUSE	Survival motor neuron protein
[1375]		Q62469	1	1	2.4					128956	MOUSE	Integrin alpha-2
[1376]		Q9D1Q6	2	2	3.4					46853.4	MOUSE	Endoplasmic reticulum resident protein 44
[1377]		Q99N95	1	1	2					39110.2	MOUSE	39S ribosomal protein L3, mitochondrial
[1378]		P51906	1	7	3.4					56694.3	MOUSE	Excitatory amino acid transporter 3
[1379]		P97742	1	1	1.8					88252.3	MOUSE	Carnitine O-palmitoyltransferase 1, liver isoform
[1380]		Q9JL19	1	1	0.7					219665	MOUSE	Nuclear receptor coactivator 6
[1381]		Q9R1C0				1	1	0	2.6	39126.2	MOUSE	Transcription initiation factor TFIID subunit 7
[1382]		Q8BH02	1	1	2.6					47586.1	MOUSE	Torsin-4A
[1383]		Q8CGN5	1	1	3.7					55596.3	MOUSE	Perilipin-1
[1384]		P54227				2	2	0	12.1	17274.6	MOUSE	Stathmin
[1385]		Q8C079	1	1	1.7					95585.7	MOUSE	Striatin-interacting protein 1
[1386]		Q9DBX6	1	1	5.6					55632.1	MOUSE	Cytochrome P450 2S1
[1387]		Q91ZM8	1	1	5.6					24453.3	MOUSE	Calcium-binding protein 7
[1388]		Q921C3	1	1	0.3					259230	MOUSE	Bromodomain and WD repeat-containing protein 1
[1389]		Q6ZQ73	1	1	1.8					135634	MOUSE	Cullin-associated NEDD8-dissociated protein 2
[1390]		P62897				1	1	0	7.6	11605.5	MOUSE	Cytochrome c, somatic
[1391]		Q8BSF4	3	3	10.8					45927	MOUSE	Phosphatidylserine decarboxylase proenzyme
[1392]		Q9WTQ5				2	3	0	1.2	180696	MOUSE	A-kinase anchor protein 12
[1393]		P20263	2	2	4					38216.8	MOUSE	POU domain, class 5, transcription factor 1

## Sheet: Report Annotations
Rank	Uniq Pep	Acc #	Num Unique	Peptide Count PU	% Cov	Num Unique	Peptide Count GM	PU/(GA*2.2978)	% Cov	Protein MW	Species	Protein Name					Acc #	Entry	Reviewed	Entry Name	Protein names	Gene Names	Organism	Length	Function [CC]	Annotation	Gene Ontology (molecular function)	Gene Ontology (biological process)
[3-1]	55	P11499	71	708	80.2	60	218	1.4134	56.1	83281.9	MOUSE	Heat shock protein HSP 90-beta					P11499	P11499	reviewed	HS90B_MOUSE	Heat shock protein HSP 90-beta (Heat shock 84 kDa) (HSP 84) (HSP84) (Tumor-specific transplantation 84 kDa antigen) (TSTA)	Hsp90ab1 Hsp84 Hsp84-1 Hspcb	Mus musculus (Mouse)	724	FUNCTION: Molecular chaperone that promotes the maturation, structural maintenance and proper regulation of specific target proteins involved for instance in cell cycle control and signal transduction. Undergoes a functional cycle linked to its ATPase activity. This cycle probably induces conformational changes in the client proteins, thereby causing their activation. Interacts dynamically with v…	5.0	ATP binding [GO:0005524]; ATP hydrolysis activity [GO:0016887]; ATP-dependent protein binding [GO:0043008]; ATP-dependent protein folding chaperone [GO:0140662]; CTP binding [GO:0002135]; dATP binding [GO:0032564]; disordered domain specific binding [GO:0097718]; DNA polymerase binding [GO:0070182]; double-stranded RNA binding [GO:0003725]; GTP binding [GO:0005525]; heat shock protein binding [GO…	axon extension [GO:0048675]; cellular response to heat [GO:0034605]; cellular response to interleukin-4 [GO:0071353]; central nervous system neuron axonogenesis [GO:0021955]; chaperone-mediated protein complex assembly [GO:0051131]; establishment of cell polarity [GO:0030010]; negative regulation of apoptotic process [GO:0043066]; negative regulation of complement-dependent cytotoxicity [GO:19036…
[3]		P07901	73	540	76.1	63	235	1.00003	57.4	84788.6	MOUSE	Heat shock protein HSP 90-alpha					P07901	P07901	reviewed	HS90A_MOUSE	Heat shock protein HSP 90-alpha (EC 3.6.4.10) (Heat shock 86 kDa) (HSP 86) (HSP86) (Tumor-specific transplantation 86 kDa antigen) (TSTA)	Hsp90aa1 Hsp86 Hsp86-1 Hspca	Mus musculus (Mouse)	733	FUNCTION: Molecular chaperone that promotes the maturation, structural maintenance and proper regulation of specific target proteins involved for instance in cell cycle control and signal transduction. Undergoes a functional cycle that is linked to its ATPase activity which is essential for its chaperone activity. This cycle probably induces conformational changes in the client proteins, thereby …	5.0	ATP binding [GO:0005524]; ATP hydrolysis activity [GO:0016887]; ATP-dependent protein folding chaperone [GO:0140662]; CTP binding [GO:0002135]; dATP binding [GO:0032564]; disordered domain specific binding [GO:0097718]; DNA polymerase binding [GO:0070182]; GTP binding [GO:0005525]; GTPase binding [GO:0051020]; histone deacetylase binding [GO:0042826]; identical protein binding [GO:0042802]; mRNA …	activation of innate immune response [GO:0002218]; axon extension [GO:0048675]; cardiac muscle cell apoptotic process [GO:0010659]; cellular response to heat [GO:0034605]; cellular response to virus [GO:0098586]; central nervous system neuron axonogenesis [GO:0021955]; chaperone-mediated protein complex assembly [GO:0051131]; establishment of cell polarity [GO:0030010]; neuron migration [GO:00017…
[999]		O55028	1	1	4.1					46587.9	MOUSE	[3-methyl-2-oxobutanoate dehydrogenase [lipoamide]] kinase, mitochondrial					O55028	O55028	reviewed	BCKD_MOUSE	[3-methyl-2-oxobutanoate dehydrogenase [lipoamide]] kinase, mitochondrial (EC 2.7.11.4) (Branched-chain alpha-ketoacid dehydrogenase kinase) (BCKD-kinase) (BCKDHKIN)	Bckdk	Mus musculus (Mouse)	412	FUNCTION: Catalyzes the phosphorylation and inactivation of the branched-chain alpha-ketoacid dehydrogenase complex, the key regulatory enzyme of the valine, leucine and isoleucine catabolic pathways. Key enzyme that regulate the activity state of the BCKD complex. {ECO:0000250|UniProtKB:O14874}.	5.0	[3-methyl-2-oxobutanoate dehydrogenase (acetyl-transferring)] kinase activity [GO:0047323]; ATP binding [GO:0005524]; protein kinase activity [GO:0004672]; protein serine/threonine kinase activity [GO:0004674]; pyruvate dehydrogenase (acetyl-transferring) kinase activity [GO:0004740]	branched-chain amino acid catabolic process [GO:0009083]; isoleucine catabolic process [GO:0006550]; leucine catabolic process [GO:0006552]; phosphorylation [GO:0016310]; protein phosphorylation [GO:0006468]; regulation of glucose metabolic process [GO:0010906]; spermatogenesis [GO:0007283]; valine catabolic process [GO:0006574]
[1333]		P54923	1	1	5					40068.7	MOUSE	[Protein ADP-ribosylarginine] hydrolase					P54923	P54923	reviewed	ADPRH_MOUSE	ADP-ribosylhydrolase ARH1 (EC 3.2.2.19) (ADP-ribose-L-arginine cleaving enzyme) ([Protein ADP-ribosylarginine] hydrolase) (ADP-ribosylarginine hydrolase)	Adprh Arh1	Mus musculus (Mouse)	362	FUNCTION: Specifically acts as an arginine mono-ADP-ribosylhydrolase by mediating the removal of mono-ADP-ribose attached to arginine residues on proteins. {ECO:0000269|PubMed:8349667}.	4.0	ADP-ribosylarginine hydrolase activity [GO:0003875]; magnesium ion binding [GO:0000287]; potassium ion binding [GO:0030955]	protein de-ADP-ribosylation [GO:0051725]; protein modification process [GO:0036211]
[241]		Q8BFP9	10	11	29					48995.4	MOUSE	[Pyruvate dehydrogenase (acetyl-transferring)] kinase isozyme 1, mitochondrial					Q8BFP9	Q8BFP9	reviewed	PDK1_MOUSE	[Pyruvate dehydrogenase (acetyl-transferring)] kinase isozyme 1, mitochondrial (EC 2.7.11.2) (Pyruvate dehydrogenase kinase isoform 1) (PDH kinase 1)	Pdk1	Mus musculus (Mouse)	434	FUNCTION: Kinase that plays a key role in regulation of glucose and fatty acid metabolism and homeostasis via phosphorylation of the pyruvate dehydrogenase subunits PDHA1 and PDHA2. This inhibits pyruvate dehydrogenase activity, and thereby regulates metabolite flux through the tricarboxylic acid cycle, down-regulates aerobic respiration and inhibits the formation of acetyl-coenzyme A from pyruva…	5.0	ATP binding [GO:0005524]; identical protein binding [GO:0042802]; protein kinase activity [GO:0004672]; protein serine/threonine kinase activity [GO:0004674]; protein-containing complex binding [GO:0044877]; pyruvate dehydrogenase (acetyl-transferring) kinase activity [GO:0004740]	cell population proliferation [GO:0008283]; cell surface receptor signaling pathway [GO:0007166]; glucose metabolic process [GO:0006006]; hypoxia-inducible factor-1alpha signaling pathway [GO:0097411]; intracellular signal transduction [GO:0035556]; intrinsic apoptotic signaling pathway in response to oxidative stress [GO:0008631]; peptidyl-serine phosphorylation [GO:0018105]; protein phosphoryla…
[715]		Q922H2	2	3	7.7					47923.4	MOUSE	[Pyruvate dehydrogenase (acetyl-transferring)] kinase isozyme 3, mitochondrial					Q922H2	Q922H2	reviewed	PDK3_MOUSE	[Pyruvate dehydrogenase (acetyl-transferring)] kinase isozyme 3, mitochondrial (EC 2.7.11.2) (Pyruvate dehydrogenase kinase isoform 3)	Pdk3	Mus musculus (Mouse)	415	FUNCTION: Inhibits pyruvate dehydrogenase activity by phosphorylation of the E1 subunit PDHA1, and thereby regulates glucose metabolism and aerobic respiration. Can also phosphorylate PDHA2. Decreases glucose utilization and increases fat metabolism in response to prolonged fasting, and as adaptation to a high-fat diet. Plays a role in glucose homeostasis and in maintaining normal blood glucose l…	4.0	ATP binding [GO:0005524]; protein kinase activity [GO:0004672]; protein serine/threonine kinase activity [GO:0004674]; pyruvate dehydrogenase (acetyl-transferring) kinase activity [GO:0004740]	cellular response to fatty acid [GO:0071398]; cellular response to glucose stimulus [GO:0071333]; glucose metabolic process [GO:0006006]; hypoxia-inducible factor-1alpha signaling pathway [GO:0097411]; peptidyl-serine phosphorylation [GO:0018105]; peroxisome proliferator activated receptor signaling pathway [GO:0035357]; protein phosphorylation [GO:0006468]; regulation of acetyl-CoA biosynthetic …
[1005]		Q9D6Y9	1	1	2.4					80364.4	MOUSE	1,4-alpha-glucan-branching enzyme					Q9D6Y9	Q9D6Y9	reviewed	GLGB_MOUSE	1,4-alpha-glucan-branching enzyme (EC 2.4.1.18) (Brancher enzyme) (Glycogen-branching enzyme)	Gbe1	Mus musculus (Mouse)	702	FUNCTION: Required for normal glycogen accumulation. The alpha 1-6 branches of glycogen play an important role in increasing the solubility of the molecule. {ECO:0000250|UniProtKB:Q04446}.	4.0	1,4-alpha-glucan branching enzyme activity [GO:0003844]; 1,4-alpha-glucan branching enzyme activity (using a glucosylated glycogenin as primer for glycogen synthesis) [GO:0102752]; carbohydrate binding [GO:0030246]; cation binding [GO:0043169]; hydrolase activity, hydrolyzing O-glycosyl compounds [GO:0004553]	glycogen biosynthetic process [GO:0005978]; negative regulation of neuron apoptotic process [GO:0043524]
[991]		Q64433				1	2	0	13.7	10962.8	MOUSE	10 kDa heat shock protein, mitochondrial					Q64433	Q64433	reviewed	CH10_MOUSE	10 kDa heat shock protein, mitochondrial (Hsp10) (10 kDa chaperonin) (Chaperonin 10) (CPN10)	Hspe1	Mus musculus (Mouse)	102	FUNCTION: Co-chaperonin implicated in mitochondrial protein import and macromolecular assembly. Together with Hsp60, facilitates the correct folding of imported proteins. May also prevent misfolding and promote the refolding and proper assembly of unfolded polypeptides generated under stress conditions in the mitochondrial matrix. The functional units of these chaperonins consist of heptameric ri…	3.0	ATP binding [GO:0005524]; metal ion binding [GO:0046872]; protein folding chaperone [GO:0044183]; protein-folding chaperone binding [GO:0051087]; unfolded protein binding [GO:0051082]	chaperone cofactor-dependent protein refolding [GO:0051085]
[65-1]	24	O08810	17	18	21.6	14	17	0.460799	17.5	109362	MOUSE	116 kDa U5 small nuclear ribonucleoprotein component					O08810	O08810	reviewed	U5S1_MOUSE	116 kDa U5 small nuclear ribonucleoprotein component (Elongation factor Tu GTP-binding domain-containing protein 2) (U5 snRNP-specific protein, 116 kDa) (U5-116 kDa)	Eftud2 Snrp116	Mus musculus (Mouse)	971	FUNCTION: Required for pre-mRNA splicing as component of the spliceosome, including pre-catalytic, catalytic and post-catalytic spliceosomal complexes (By similarity). Component of the U5 snRNP and the U4/U6-U5 tri-snRNP complex, a building block of the spliceosome (By similarity). As a component of the minor spliceosome, involved in the splicing of U12-type introns in pre-mRNAs (By similarity). …	5.0	GTP binding [GO:0005525]; GTPase activity [GO:0003924]; U5 snRNA binding [GO:0030623]	mRNA splicing, via spliceosome [GO:0000398]
[153-5]	3	Q9CQV8	5	5	22.4					28086.7	MOUSE	14-3-3 protein beta/alpha					Q9CQV8	Q9CQV8	reviewed	1433B_MOUSE	14-3-3 protein beta/alpha (Protein kinase C inhibitor protein 1) (KCIP-1) [Cleaved into: 14-3-3 protein beta/alpha, N-terminally processed]	Ywhab	Mus musculus (Mouse)	246	FUNCTION: Adapter protein implicated in the regulation of a large spectrum of both general and specialized signaling pathways. Binds to a large number of partners, usually by recognition of a phosphoserine or phosphothreonine motif. Binding generally results in the modulation of the activity of the binding partner. Negative regulator of osteogenesis. Blocks the nuclear translocation of the phosph…	5.0	enzyme binding [GO:0019899]; histone deacetylase binding [GO:0042826]; identical protein binding [GO:0042802]; phosphoprotein binding [GO:0051219]; phosphoserine residue binding [GO:0050815]; protein domain specific binding [GO:0019904]; protein kinase inhibitor activity [GO:0004860]; protein-containing complex binding [GO:0044877]	cytoplasmic sequestering of protein [GO:0051220]; negative regulation of DNA-templated transcription [GO:0045892]; negative regulation of G protein-coupled receptor signaling pathway [GO:0045744]; negative regulation of protein dephosphorylation [GO:0035308]; positive regulation of catalytic activity [GO:0043085]; protein targeting [GO:0006605]; signal transduction [GO:0007165]
[153]		P62259	15	19	67.5	3	3	2.75626	10.2	29174.2	MOUSE	14-3-3 protein epsilon					P62259	P62259	reviewed	1433E_MOUSE	14-3-3 protein epsilon (14-3-3E)	Ywhae	Mus musculus (Mouse)	255	FUNCTION: Adapter protein implicated in the regulation of a large spectrum of both general and specialized signaling pathways. Binds to a large number of partners, usually by recognition of a phosphoserine or phosphothreonine motif. Binding generally results in the modulation of the activity of the binding partner. Positively regulates phosphorylated protein HSF1 nuclear export to the cytoplasm. …	5.0	calcium channel regulator activity [GO:0005246]; enzyme binding [GO:0019899]; histone deacetylase binding [GO:0042826]; identical protein binding [GO:0042802]; phosphoprotein binding [GO:0051219]; phosphoserine residue binding [GO:0050815]; potassium channel regulator activity [GO:0015459]; protein domain specific binding [GO:0019904]; protein heterodimerization activity [GO:0046982]; protein pho…	cellular response to heat [GO:0034605]; cerebral cortex development [GO:0021987]; hippocampus development [GO:0021766]; MAPK cascade [GO:0000165]; negative regulation of calcium ion export across plasma membrane [GO:1905913]; negative regulation of calcium ion transmembrane transporter activity [GO:1901020]; negative regulation of peptidyl-serine dephosphorylation [GO:1902309]; negative regulatio…
[153-4]	4	P68510	6	6	34.6					28212	MOUSE	14-3-3 protein eta					P68510	P68510	reviewed	1433F_MOUSE	14-3-3 protein eta	Ywhah	Mus musculus (Mouse)	246	FUNCTION: Adapter protein implicated in the regulation of a large spectrum of both general and specialized signaling pathways. Binds to a large number of partners, usually by recognition of a phosphoserine or phosphothreonine motif. Binding generally results in the modulation of the activity of the binding partner. Negatively regulates the kinase activity of PDPK1 (By similarity). {ECO:0000250}.	5.0	actin binding [GO:0003779]; enzyme binding [GO:0019899]; identical protein binding [GO:0042802]; nuclear glucocorticoid receptor binding [GO:0035259]; protein domain specific binding [GO:0019904]; protein heterodimerization activity [GO:0046982]; sodium channel regulator activity [GO:0017080]; transmembrane transporter binding [GO:0044325]	cytoskeleton organization [GO:0007010]; glucocorticoid catabolic process [GO:0006713]; glucocorticoid receptor signaling pathway [GO:0042921]; intracellular protein transport [GO:0006886]; membrane depolarization during action potential [GO:0086010]; negative regulation of apoptotic process [GO:0043066]; negative regulation of dendrite morphogenesis [GO:0050774]; positive regulation of DNA-templa…
[153-2]	5	P61982	7	8	31.6					28302.8	MOUSE	14-3-3 protein gamma					P61982	P61982	reviewed	1433G_MOUSE	14-3-3 protein gamma [Cleaved into: 14-3-3 protein gamma, N-terminally processed]	Ywhag	Mus musculus (Mouse)	247	FUNCTION: Adapter protein implicated in the regulation of a large spectrum of both general and specialized signaling pathways. Binds to a large number of partners, usually by recognition of a phosphoserine or phosphothreonine motif. Binding generally results in the modulation of the activity of the binding partner.	5.0	actin binding [GO:0003779]; identical protein binding [GO:0042802]; insulin-like growth factor receptor binding [GO:0005159]; protein domain specific binding [GO:0019904]; protein kinase C binding [GO:0005080]; receptor tyrosine kinase binding [GO:0030971]	cellular response to insulin stimulus [GO:0032869]; protein targeting [GO:0006605]; regulation of neuron differentiation [GO:0045664]; regulation of synaptic plasticity [GO:0048167]; signal transduction [GO:0007165]
[153-3]	5	P68254	7	7	35.1					27778.5	MOUSE	14-3-3 protein theta					P68254	P68254	reviewed	1433T_MOUSE	14-3-3 protein theta (14-3-3 protein tau)	Ywhaq	Mus musculus (Mouse)	245	FUNCTION: Adapter protein implicated in the regulation of a large spectrum of both general and specialized signaling pathways. Binds to a large number of partners, usually by recognition of a phosphoserine or phosphothreonine motif. Binding generally results in the modulation of the activity of the binding partner. Negatively regulates the kinase activity of PDPK1 (By similarity). {ECO:0000250}.	5.0	14-3-3 protein binding [GO:0071889]; identical protein binding [GO:0042802]; protein domain specific binding [GO:0019904]; transmembrane transporter binding [GO:0044325]	negative regulation of DNA-templated transcription [GO:0045892]; negative regulation of monoatomic ion transmembrane transport [GO:0034766]; protein targeting [GO:0006605]; signal transduction [GO:0007165]; small GTPase mediated signal transduction [GO:0007264]
[153-1]	9	P63101	10	12	46.9	5	5	1.04448	21.6	27771.4	MOUSE	14-3-3 protein zeta/delta					P63101	P63101	reviewed	1433Z_MOUSE	14-3-3 protein zeta/delta (Protein kinase C inhibitor protein 1) (KCIP-1) (SEZ-2)	Ywhaz	Mus musculus (Mouse)	245	FUNCTION: Adapter protein implicated in the regulation of a large spectrum of both general and specialized signaling pathways. Binds to a large number of partners, usually by recognition of a phosphoserine or phosphothreonine motif. Binding generally results in the modulation of the activity of the binding partner. Promotes cytosolic retention and inactivation of TFEB transcription factor by bind…	5.0	DNA-binding transcription factor binding [GO:0140297]; identical protein binding [GO:0042802]; phosphoserine residue binding [GO:0050815]; protein domain specific binding [GO:0019904]; protein kinase binding [GO:0019901]; protein sequestering activity [GO:0140311]; protein-containing complex binding [GO:0044877]; transmembrane transporter binding [GO:0044325]; ubiquitin protein ligase binding [GO…	angiogenesis [GO:0001525]; ERK1 and ERK2 cascade [GO:0070371]; establishment of Golgi localization [GO:0051683]; Golgi reassembly [GO:0090168]; histamine secretion by mast cell [GO:0002553]; lung development [GO:0030324]; negative regulation of innate immune response [GO:0045824]; negative regulation of protein localization to nucleus [GO:1900181]; negative regulation of transcription by RNA poly…
[947]		Q9ERR7	1	1	9.9					17806.7	MOUSE	15 kDa selenoprotein					Q9ERR7	Q9ERR7	reviewed	SEP15_MOUSE	Selenoprotein F (15 kDa selenoprotein)	Selenof Sep15	Mus musculus (Mouse)	162	FUNCTION: May be involved in redox reactions associated with the formation of disulfide bonds (By similarity). May contribute to the quality control of protein folding in the endoplasmic reticulum. May regulate protein folding by enhancing the catalytic activity of UGGT1/UGCGL1 and UGGT2/UGCGL2 (By similarity). {ECO:0000250|UniProtKB:O60613, ECO:0000250|UniProtKB:Q923V8}.	3.0	oxidoreductase activity [GO:0016491]; selenium binding [GO:0008430]; thioredoxin peroxidase activity [GO:0008379]	'de novo' post-translational protein folding [GO:0051084]; sperm DNA condensation [GO:0035092]
[1370]		P51432				1	1	0	0.7	139488	MOUSE	1-phosphatidylinositol 4,5-bisphosphate phosphodiesterase beta-3					P51432	P51432	reviewed	PLCB3_MOUSE	1-phosphatidylinositol 4,5-bisphosphate phosphodiesterase beta-3 (EC 3.1.4.11) (Phosphoinositide phospholipase C-beta-3) (Phospholipase C-beta-3) (PLC-beta-3)	Plcb3	Mus musculus (Mouse)	1234	FUNCTION: The production of the second messenger molecules diacylglycerol (DAG) and inositol 1,4,5-trisphosphate (IP3) is mediated by activated phosphatidylinositol-specific phospholipase C enzymes. {ECO:0000250|UniProtKB:Q99JE6}.	5.0	calcium ion binding [GO:0005509]; calmodulin binding [GO:0005516]; molecular adaptor activity [GO:0060090]; molecular function activator activity [GO:0140677]; phosphatidylinositol phospholipase C activity [GO:0004435]	G protein-coupled receptor signaling pathway [GO:0007186]; inositol trisphosphate metabolic process [GO:0032957]; phosphatidylinositol catabolic process [GO:0031161]; phosphatidylinositol metabolic process [GO:0046488]; phosphatidylinositol-mediated signaling [GO:0048015]; post-Golgi vesicle-mediated transport [GO:0006892]; regulation of systemic arterial blood pressure [GO:0003073]; release of s…
[1228]		P16330	1	1	3.1					47123.7	MOUSE	2',3'-cyclic-nucleotide 3'-phosphodiesterase					P16330	P16330	reviewed	CN37_MOUSE	2',3'-cyclic-nucleotide 3'-phosphodiesterase (CNP) (CNPase) (EC 3.1.4.37)	Cnp Cnp1	Mus musculus (Mouse)	420	FUNCTION: Catalyzes the formation of 2'-nucleotide products from 2',3'-cyclic substrates (By similarity). May participate in RNA metabolism in the myelinating cell, CNP is the third most abundant protein in central nervous system myelin (PubMed:22393399). {ECO:0000250|UniProtKB:P06623, ECO:0000269|PubMed:22393399}.	5.0	2',3'-cyclic-nucleotide 3'-phosphodiesterase activity [GO:0004113]; cyclic nucleotide binding [GO:0030551]; RNA binding [GO:0003723]	adult locomotory behavior [GO:0008344]; aging [GO:0007568]; axonogenesis [GO:0007409]; cyclic nucleotide catabolic process [GO:0009214]; forebrain development [GO:0030900]; microtubule cytoskeleton organization [GO:0000226]; oligodendrocyte differentiation [GO:0048709]; regulation of mitochondrial membrane permeability [GO:0046902]; response to lipopolysaccharide [GO:0032496]; response to toxic s…
[1203]		P11928	1	1	3					42428.9	MOUSE	2'-5'-oligoadenylate synthase 1A					P11928	P11928	reviewed	OAS1A_MOUSE	2'-5'-oligoadenylate synthase 1A ((2-5')oligo(A) synthase 1A) (2-5A synthase 1A) (EC 2.7.7.84) (p42 OAS)	Oas1a Oias1	Mus musculus (Mouse)	367	FUNCTION: Interferon-induced, dsRNA-activated antiviral enzyme which plays a critical role in cellular innate antiviral response. In addition, it may also play a role in other cellular processes such as apoptosis, cell growth, differentiation and gene regulation. Synthesizes higher oligomers of 2'-5'-oligoadenylates (2-5A) from ATP which then bind to the inactive monomeric form of ribonuclease L …	5.0	2'-5'-oligoadenylate synthetase activity [GO:0001730]; ATP binding [GO:0005524]; double-stranded RNA binding [GO:0003725]; metal ion binding [GO:0046872]	antiviral innate immune response [GO:0140374]; cellular response to interferon-alpha [GO:0035457]; cellular response to interferon-beta [GO:0035458]; defense response to bacterium [GO:0042742]; defense response to virus [GO:0051607]; glucose homeostasis [GO:0042593]; glucose metabolic process [GO:0006006]; negative regulation of chemokine (C-X-C motif) ligand 2 production [GO:2000342]; negative r…
[393]		P62334	6	7	21.9					44173.4	MOUSE	26S protease regulatory subunit 10B					P62334	P62334	reviewed	PRS10_MOUSE	26S proteasome regulatory subunit 10B (26S proteasome AAA-ATPase subunit RPT4) (Proteasome 26S subunit ATPase 6) (Proteasome subunit p42)	Psmc6 Sug2	Mus musculus (Mouse)	389	FUNCTION: Component of the 26S proteasome, a multiprotein complex involved in the ATP-dependent degradation of ubiquitinated proteins. This complex plays a key role in the maintenance of protein homeostasis by removing misfolded or damaged proteins, which could impair cellular functions, and by removing proteins whose functions are no longer required. Therefore, the proteasome participates in num…	4.0	ATP binding [GO:0005524]; ATP hydrolysis activity [GO:0016887]; identical protein binding [GO:0042802]; proteasome-activating activity [GO:0036402]	positive regulation of inclusion body assembly [GO:0090261]; positive regulation of RNA polymerase II transcription preinitiation complex assembly [GO:0045899]; ubiquitin-dependent ERAD pathway [GO:0030433]
[141-2]	9	P62192	10	10	35.5					49184.9	MOUSE	26S protease regulatory subunit 4					P62192	P62192	reviewed	PRS4_MOUSE	26S proteasome regulatory subunit 4 (P26s4) (26S proteasome AAA-ATPase subunit RPT2) (Proteasome 26S subunit ATPase 1)	Psmc1	Mus musculus (Mouse)	440	FUNCTION: Component of the 26S proteasome, a multiprotein complex involved in the ATP-dependent degradation of ubiquitinated proteins. This complex plays a key role in the maintenance of protein homeostasis by removing misfolded or damaged proteins, which could impair cellular functions, and by removing proteins whose functions are no longer required. Therefore, the proteasome participates in num…	5.0	ATP binding [GO:0005524]; ATP hydrolysis activity [GO:0016887]; proteasome-activating activity [GO:0036402]; TBP-class protein binding [GO:0017025]	negative regulation of neuron death [GO:1901215]; proteasome-mediated ubiquitin-dependent protein catabolic process [GO:0043161]
[663]		O88685	4	4	9	1	1	1.7408	2.3	49549.4	MOUSE	26S protease regulatory subunit 6A					O88685	O88685	reviewed	PRS6A_MOUSE	26S proteasome regulatory subunit 6A (26S proteasome AAA-ATPase subunit RPT5) (Proteasome 26S subunit ATPase 3) (Tat-binding protein 1) (TBP-1)	Psmc3 Tbp1	Mus musculus (Mouse)	442	FUNCTION: Component of the 26S proteasome, a multiprotein complex involved in the ATP-dependent degradation of ubiquitinated proteins. This complex plays a key role in the maintenance of protein homeostasis by removing misfolded or damaged proteins, which could impair cellular functions, and by removing proteins whose functions are no longer required. Therefore, the proteasome participates in num…	4.0	ATP binding [GO:0005524]; ATP hydrolysis activity [GO:0016887]; identical protein binding [GO:0042802]; proteasome-activating activity [GO:0036402]	blastocyst development [GO:0001824]; modulation by host of viral transcription [GO:0043921]; positive regulation of transcription by RNA polymerase II [GO:0045944]; proteasome-mediated ubiquitin-dependent protein catabolic process [GO:0043161]
[141-1]	15	P54775	16	26	55					47408.7	MOUSE	26S protease regulatory subunit 6B					P54775	P54775	reviewed	PRS6B_MOUSE	26S proteasome regulatory subunit 6B (26S proteasome AAA-ATPase subunit RPT3) (CIP21) (MB67-interacting protein) (MIP224) (Proteasome 26S subunit ATPase 4) (Tat-binding protein 7) (TBP-7)	Psmc4 Tbp7	Mus musculus (Mouse)	418	FUNCTION: Component of the 26S proteasome, a multiprotein complex involved in the ATP-dependent degradation of ubiquitinated proteins. This complex plays a key role in the maintenance of protein homeostasis by removing misfolded or damaged proteins, which could impair cellular functions, and by removing proteins whose functions are no longer required. Therefore, the proteasome participates in num…	5.0	ATP binding [GO:0005524]; ATP hydrolysis activity [GO:0016887]; proteasome-activating activity [GO:0036402]	blastocyst development [GO:0001824]; proteasome-mediated ubiquitin-dependent protein catabolic process [GO:0043161]
[534]		P46471	7	7	19.6					48648.3	MOUSE	26S protease regulatory subunit 7					P46471	P46471	reviewed	PRS7_MOUSE	26S proteasome regulatory subunit 7 (26S proteasome AAA-ATPase subunit RPT1) (Proteasome 26S subunit ATPase 2)	Psmc2 Mss1	Mus musculus (Mouse)	433	FUNCTION: Component of the 26S proteasome, a multiprotein complex involved in the ATP-dependent degradation of ubiquitinated proteins. This complex plays a key role in the maintenance of protein homeostasis by removing misfolded or damaged proteins, which could impair cellular functions, and by removing proteins whose functions are no longer required. Therefore, the proteasome participates in num…	5.0	ATP binding [GO:0005524]; ATP hydrolysis activity [GO:0016887]; general transcription initiation factor binding [GO:0140296]; proteasome-activating activity [GO:0036402]; TBP-class protein binding [GO:0017025]	proteasome-mediated ubiquitin-dependent protein catabolic process [GO:0043161]; ubiquitin-dependent protein catabolic process [GO:0006511]
[141]		P62196	14	16	50.7					45626.4	MOUSE	26S protease regulatory subunit 8					P62196	P62196	reviewed	PRS8_MOUSE	26S proteasome regulatory subunit 8 (26S proteasome AAA-ATPase subunit RPT6) (Proteasome 26S subunit ATPase 5) (Proteasome subunit p45) (p45/SUG) (mSUG1)	Psmc5 Sug1	Mus musculus (Mouse)	406	FUNCTION: Component of the 26S proteasome, a multiprotein complex involved in the ATP-dependent degradation of ubiquitinated proteins. This complex plays a key role in the maintenance of protein homeostasis by removing misfolded or damaged proteins, which could impair cellular functions, and by removing proteins whose functions are no longer required. Therefore, the proteasome participates in num…	5.0	ATP binding [GO:0005524]; ATP hydrolysis activity [GO:0016887]; DNA-binding transcription factor binding [GO:0140297]; general transcription initiation factor binding [GO:0140296]; proteasome-activating activity [GO:0036402]; signaling receptor binding [GO:0005102]; TBP-class protein binding [GO:0017025]; thyrotropin-releasing hormone receptor binding [GO:0031531]	modulation of chemical synaptic transmission [GO:0050804]; negative regulation of DNA-templated transcription [GO:0045892]; positive regulation of inclusion body assembly [GO:0090261]; proteasome-mediated ubiquitin-dependent protein catabolic process [GO:0043161]; regulation of transcription by RNA polymerase II [GO:0006357]
[135]		Q3TXS7	16	18	21.7	5	5	1.56672	5.4	105731	MOUSE	26S proteasome non-ATPase regulatory subunit 1					Q3TXS7	Q3TXS7	reviewed	PSMD1_MOUSE	26S proteasome non-ATPase regulatory subunit 1 (26S proteasome regulatory subunit RPN2) (26S proteasome regulatory subunit S1)	Psmd1	Mus musculus (Mouse)	953	FUNCTION: Component of the 26S proteasome, a multiprotein complex involved in the ATP-dependent degradation of ubiquitinated proteins. This complex plays a key role in the maintenance of protein homeostasis by removing misfolded or damaged proteins, which could impair cellular functions, and by removing proteins whose functions are no longer required. Therefore, the proteasome participates in num…	4.0	enzyme regulator activity [GO:0030234]; ubiquitin protein ligase binding [GO:0031625]	proteasome-mediated ubiquitin-dependent protein catabolic process [GO:0043161]; regulation of protein catabolic process [GO:0042176]
[203]		Q8BG32	13	17	42.9					47437.2	MOUSE	26S proteasome non-ATPase regulatory subunit 11					Q8BG32	Q8BG32	reviewed	PSD11_MOUSE	26S proteasome non-ATPase regulatory subunit 11 (26S proteasome regulatory subunit RPN6) (26S proteasome regulatory subunit S9) (26S proteasome regulatory subunit p44.5)	Psmd11	Mus musculus (Mouse)	422	FUNCTION: Component of the 26S proteasome, a multiprotein complex involved in the ATP-dependent degradation of ubiquitinated proteins. This complex plays a key role in the maintenance of protein homeostasis by removing misfolded or damaged proteins, which could impair cellular functions, and by removing proteins whose functions are no longer required. Therefore, the proteasome participates in num…	5.0	structural molecule activity [GO:0005198]	proteasome assembly [GO:0043248]; stem cell differentiation [GO:0048863]; ubiquitin-dependent protein catabolic process [GO:0006511]
[376]		Q9D8W5	8	10	18.6					52895.7	MOUSE	26S proteasome non-ATPase regulatory subunit 12					Q9D8W5	Q9D8W5	reviewed	PSD12_MOUSE	26S proteasome non-ATPase regulatory subunit 12 (26S proteasome regulatory subunit RPN5) (26S proteasome regulatory subunit p55)	Psmd12	Mus musculus (Mouse)	456	FUNCTION: Component of the 26S proteasome, a multiprotein complex involved in the ATP-dependent degradation of ubiquitinated proteins. This complex plays a key role in the maintenance of protein homeostasis by removing misfolded or damaged proteins, which could impair cellular functions, and by removing proteins whose functions are no longer required. Therefore, the proteasome participates in num…	4.0
[222]		Q9WVJ2	14	18	45.7					42809.8	MOUSE	26S proteasome non-ATPase regulatory subunit 13					Q9WVJ2	Q9WVJ2	reviewed	PSD13_MOUSE	26S proteasome non-ATPase regulatory subunit 13 (26S proteasome regulatory subunit RPN9) (26S proteasome regulatory subunit S11) (26S proteasome regulatory subunit p40.5)	Psmd13	Mus musculus (Mouse)	376	FUNCTION: Component of the 26S proteasome, a multiprotein complex involved in the ATP-dependent degradation of ubiquitinated proteins. This complex plays a key role in the maintenance of protein homeostasis by removing misfolded or damaged proteins, which could impair cellular functions, and by removing proteins whose functions are no longer required. Therefore, the proteasome participates in num…	4.0	endopeptidase activity [GO:0004175]; structural molecule activity [GO:0005198]	meiosis I [GO:0007127]; ubiquitin-dependent protein catabolic process [GO:0006511]
[372]		O35593	11	13	51.6	2	2	2.82879	6.5	34577.4	MOUSE	26S proteasome non-ATPase regulatory subunit 14					O35593	O35593	reviewed	PSDE_MOUSE	26S proteasome non-ATPase regulatory subunit 14 (EC 3.4.19.-) (26S proteasome regulatory subunit RPN11) (MAD1)	Psmd14 Pad1	Mus musculus (Mouse)	310	FUNCTION: Component of the 26S proteasome, a multiprotein complex involved in the ATP-dependent degradation of ubiquitinated proteins. This complex plays a key role in the maintenance of protein homeostasis by removing misfolded or damaged proteins, which could impair cellular functions, and by removing proteins whose functions are no longer required. Therefore, the proteasome participates in num…	5.0	endopeptidase activator activity [GO:0061133]; endopeptidase activity [GO:0004175]; metal ion binding [GO:0046872]; metal-dependent deubiquitinase activity [GO:0140492]; metallopeptidase activity [GO:0008237]; proteasome binding [GO:0070628]	double-strand break repair via homologous recombination [GO:0000724]; double-strand break repair via nonhomologous end joining [GO:0006303]; proteasome-mediated ubiquitin-dependent protein catabolic process [GO:0043161]; protein deubiquitination [GO:0016579]; protein K63-linked deubiquitination [GO:0070536]; regulation of proteasomal protein catabolic process [GO:0061136]; response to ethanol [GO…
[170]		Q8VDM4	14	18	22.7					100204	MOUSE	26S proteasome non-ATPase regulatory subunit 2					Q8VDM4	Q8VDM4	reviewed	PSMD2_MOUSE	26S proteasome non-ATPase regulatory subunit 2 (26S proteasome regulatory subunit RPN1) (26S proteasome regulatory subunit S2) (26S proteasome subunit p97)	Psmd2	Mus musculus (Mouse)	908	FUNCTION: Component of the 26S proteasome, a multiprotein complex involved in the ATP-dependent degradation of ubiquitinated proteins. This complex plays a key role in the maintenance of protein homeostasis by removing misfolded or damaged proteins, which could impair cellular functions, and by removing proteins whose functions are no longer required. Therefore, the proteasome participates in num…	5.0	enzyme regulator activity [GO:0030234]	proteasome-mediated ubiquitin-dependent protein catabolic process [GO:0043161]; regulation of protein catabolic process [GO:0042176]
[143]		P14685	15	17	39.6					60718.8	MOUSE	26S proteasome non-ATPase regulatory subunit 3					P14685	P14685	reviewed	PSMD3_MOUSE	26S proteasome non-ATPase regulatory subunit 3 (26S proteasome regulatory subunit RPN3) (26S proteasome regulatory subunit S3) (Proteasome subunit p58) (Transplantation antigen P91A) (Tum-P91A antigen)	Psmd3 P91a Tstap91a	Mus musculus (Mouse)	530	FUNCTION: Component of the 26S proteasome, a multiprotein complex involved in the ATP-dependent degradation of ubiquitinated proteins. This complex plays a key role in the maintenance of protein homeostasis by removing misfolded or damaged proteins, which could impair cellular functions, and by removing proteins whose functions are no longer required. Therefore, the proteasome participates in num…	4.0	enzyme regulator activity [GO:0030234]	regulation of protein catabolic process [GO:0042176]; ubiquitin-dependent protein catabolic process [GO:0006511]
[269]		Q8BJY1	11	12	26.4					55972.6	MOUSE	26S proteasome non-ATPase regulatory subunit 5					Q8BJY1	Q8BJY1	reviewed	PSMD5_MOUSE	26S proteasome non-ATPase regulatory subunit 5 (26S protease subunit S5 basic) (26S proteasome subunit S5B)	Psmd5 Kiaa0072	Mus musculus (Mouse)	504	FUNCTION: Acts as a chaperone during the assembly of the 26S proteasome, specifically of the base subcomplex of the PA700/19S regulatory complex (RC). In the initial step of the base subcomplex assembly is part of an intermediate PSMD5:PSMC2:PSMC1:PSMD2 module which probably assembles with a PSMD10:PSMC4:PSMC5:PAAF1 module followed by dissociation of PSMD5 (By similarity). {ECO:0000250}.	3.0		proteasome regulatory particle assembly [GO:0070682]
[423]		Q99JI4	7	9	23.9					45536.8	MOUSE	26S proteasome non-ATPase regulatory subunit 6					Q99JI4	Q99JI4	reviewed	PSMD6_MOUSE	26S proteasome non-ATPase regulatory subunit 6 (26S proteasome regulatory subunit RPN7) (26S proteasome regulatory subunit S10) (p42A)	Psmd6	Mus musculus (Mouse)	389	FUNCTION: Component of the 26S proteasome, a multiprotein complex involved in the ATP-dependent degradation of ubiquitinated proteins. This complex plays a key role in the maintenance of protein homeostasis by removing misfolded or damaged proteins, which could impair cellular functions, and by removing proteins whose functions are no longer required. Therefore, the proteasome participates in num…	3.0		proteasome-mediated ubiquitin-dependent protein catabolic process [GO:0043161]
[229]		P26516	11	17	41.4					36540.1	MOUSE	26S proteasome non-ATPase regulatory subunit 7					P26516	P26516	reviewed	PSMD7_MOUSE	26S proteasome non-ATPase regulatory subunit 7 (26S proteasome regulatory subunit RPN8) (26S proteasome regulatory subunit S12) (Mov34 protein) (Proteasome subunit p40)	Psmd7 Mov-34 Mov34	Mus musculus (Mouse)	321	FUNCTION: Component of the 26S proteasome, a multiprotein complex involved in the ATP-dependent degradation of ubiquitinated proteins. This complex plays a key role in the maintenance of protein homeostasis by removing misfolded or damaged proteins, which could impair cellular functions, and by removing proteins whose functions are no longer required. Therefore, the proteasome participates in num…	4.0	metallopeptidase activity [GO:0008237]; protein homodimerization activity [GO:0042803]	proteasome-mediated ubiquitin-dependent protein catabolic process [GO:0043161]
[921]		Q9CX56	2	2	6.8					39930.6	MOUSE	26S proteasome non-ATPase regulatory subunit 8					Q9CX56	Q9CX56	reviewed	PSMD8_MOUSE	26S proteasome non-ATPase regulatory subunit 8 (26S proteasome regulatory subunit RPN12) (26S proteasome regulatory subunit S14)	Psmd8	Mus musculus (Mouse)	353	FUNCTION: Component of the 26S proteasome, a multiprotein complex involved in the ATP-dependent degradation of ubiquitinated proteins. This complex plays a key role in the maintenance of protein homeostasis by removing misfolded or damaged proteins, which could impair cellular functions, and by removing proteins whose functions are no longer required. Therefore, the proteasome participates in num…	4.0		proteasome-mediated ubiquitin-dependent protein catabolic process [GO:0043161]
[878]		Q80ZK0	1	1	9.4					18697.9	MOUSE	28S ribosomal protein S10, mitochondrial					Q80ZK0	Q80ZK0	reviewed	RT10_MOUSE	Small ribosomal subunit protein uS10m (28S ribosomal protein S10, mitochondrial) (MRP-S10) (S10mt)	Mrps10	Mus musculus (Mouse)	160		2.0	structural constituent of ribosome [GO:0003735]	mitochondrial translation [GO:0032543]
[419]		Q9CXW2	9	10	28.7					41192.5	MOUSE	28S ribosomal protein S22, mitochondrial					Q9CXW2	Q9CXW2	reviewed	RT22_MOUSE	Small ribosomal subunit protein mS22 (28S ribosomal protein S22, mitochondrial) (MRP-S22) (S22mt)	Mrps22 Rpms22	Mus musculus (Mouse)	359		3.0	structural constituent of ribosome [GO:0003735]	mitochondrial translation [GO:0032543]
[860]		Q80ZS3	1	2	9					23443.9	MOUSE	28S ribosomal protein S26, mitochondrial					Q80ZS3	Q80ZS3	reviewed	RT26_MOUSE	Small ribosomal subunit protein mS26 (28S ribosomal protein S26, mitochondrial) (MRP-S26) (S26mt)	Mrps26	Mus musculus (Mouse)	200		2.0		mitochondrial translation [GO:0032543]
[692]		Q8BK72	4	4	13					47778.9	MOUSE	28S ribosomal protein S27, mitochondrial					Q8BK72	Q8BK72	reviewed	RT27_MOUSE	Small ribosomal subunit protein mS27 (28S ribosomal protein S27, mitochondrial) (MRP-S27) (S27mt) (Mitochondrial ribosomal protein S27)	Mrps27	Mus musculus (Mouse)	415	FUNCTION: RNA-binding component of the mitochondrial small ribosomal subunit (mt-SSU) that plays a role in mitochondrial protein synthesis. Stimulates mitochondrial mRNA translation of subunit components of the mitochondrial electron transport chain. Binds to the mitochondrial 12S rRNA (12S mt-rRNA) and tRNA(Glu). Overexpressed in hepatocellular carcinoma tissues compared with adjacent non-tumora…	4.0	mitochondrial ribosome binding [GO:0097177]; rRNA binding [GO:0019843]; tRNA binding [GO:0000049]	cell population proliferation [GO:0008283]; mitochondrial translation [GO:0032543]; positive regulation of mitochondrial translation [GO:0070131]
[394]		Q9ER88	10	12	32.5					44699.7	MOUSE	28S ribosomal protein S29, mitochondrial					Q9ER88	Q9ER88	reviewed	RT29_MOUSE	Small ribosomal subunit protein mS29 (28S ribosomal protein S29, mitochondrial) (MRP-S29) (S29mt) (Death-associated protein 3) (DAP-3)	Dap3 Mrps29	Mus musculus (Mouse)	391	FUNCTION: Involved in mediating interferon-gamma-induced cell death. {ECO:0000250|UniProtKB:P51398}.	4.0	structural constituent of ribosome [GO:0003735]	apoptotic mitochondrial changes [GO:0008637]; mitochondrial translation [GO:0032543]
[599]		Q61733	3	5	12.8					43881.2	MOUSE	28S ribosomal protein S31, mitochondrial					Q61733	Q61733	reviewed	RT31_MOUSE	Small ribosomal subunit protein mS31 (28S ribosomal protein S31, mitochondrial) (MRP-S31) (S31mt) (Imogen 38)	Mrps31 Imogn38	Mus musculus (Mouse)	384		3.0	protein domain specific binding [GO:0019904]; structural constituent of ribosome [GO:0003735]	mitochondrial translation [GO:0032543]
[1128]		Q9JIK9	2	2	7.3					25826.9	MOUSE	28S ribosomal protein S34, mitochondrial					Q9JIK9	Q9JIK9	reviewed	RT34_MOUSE	Small ribosomal subunit protein mS34 (28S ribosomal protein S34, mitochondrial) (MRP-S34) (S34mt) (T-complex expressed gene 2 protein)	Mrps34 Tce2	Mus musculus (Mouse)	218	FUNCTION: Required for mitochondrial translation, plays a role in maintaining the stability of the small ribosomal subunit and the 12S rRNA that are required for mitoribosome formation. {ECO:0000269|PubMed:25816300}.	4.0	structural constituent of ribosome [GO:0003735]	mitochondrial translation [GO:0032543]
[561]		Q8BJZ4	5	7	22.2					35975.6	MOUSE	28S ribosomal protein S35, mitochondrial					Q8BJZ4	Q8BJZ4	reviewed	RT35_MOUSE	Small ribosomal subunit protein mS35 (28S ribosomal protein S35, mitochondrial) (MRP-S35) (S35mt)	Mrps35	Mus musculus (Mouse)	320		3.0	structural constituent of ribosome [GO:0003735]	mitochondrial translation [GO:0032543]
[890]		Q99N87	3	3	8.1					48206.9	MOUSE	28S ribosomal protein S5, mitochondrial					Q99N87	Q99N87	reviewed	RT05_MOUSE	Small ribosomal subunit protein uS5m (28S ribosomal protein S5, mitochondrial) (MRP-S5) (S5mt)	Mrps5	Mus musculus (Mouse)	432		3.0	RNA binding [GO:0003723]; structural constituent of ribosome [GO:0003735]	mitochondrial translation [GO:0032543]; translation [GO:0006412]
[321]		Q9D7N3	10	10	31.3					44929.8	MOUSE	28S ribosomal protein S9, mitochondrial					Q9D7N3	Q9D7N3	reviewed	RT09_MOUSE	Small ribosomal subunit protein uS9m (28S ribosomal protein S9, mitochondrial) (MRP-S9) (S9mt)	Mrps9	Mus musculus (Mouse)	390		3.0	RNA binding [GO:0003723]; structural constituent of ribosome [GO:0003735]	mitochondrial translation [GO:0032543]
[1166]		Q9D136	1	1	7.9					35385.1	MOUSE	2-oxoglutarate and iron-dependent oxygenase domain-containing protein 3					Q9D136	Q9D136	reviewed	OGFD3_MOUSE	2-oxoglutarate and iron-dependent oxygenase domain-containing protein 3 (EC 1.14.11.-)	Ogfod3	Mus musculus (Mouse)	315		3.0	dioxygenase activity [GO:0051213]; iron ion binding [GO:0005506]; L-ascorbic acid binding [GO:0031418]; oxidoreductase activity, acting on paired donors, with incorporation or reduction of molecular oxygen [GO:0016705]
[62]		Q60597	26	35	33.7	2	2	7.61598	1.7	116450	MOUSE	2-oxoglutarate dehydrogenase, mitochondrial					Q60597	Q60597	reviewed	ODO1_MOUSE	2-oxoglutarate dehydrogenase complex component E1 (E1o) (OGDC-E1) (OGDH-E1) (EC 1.2.4.2) (2-oxoglutarate dehydrogenase, mitochondrial) (Alpha-ketoglutarate dehydrogenase) (Alpha-KGDH-E1) (Thiamine diphosphate (ThDP)-dependent 2-oxoglutarate dehydrogenase)	Ogdh Kiaa4192	Mus musculus (Mouse)	1023	FUNCTION: 2-oxoglutarate dehydrogenase (E1o) component of the 2-oxoglutarate dehydrogenase complex (OGDHC). Participates in the first step, rate limiting for the overall conversion of 2-oxoglutarate to succinyl-CoA and CO(2) catalyzed by the whole OGDHC. Catalyzes the irreversible decarboxylation of 2-oxoglutarate (alpha-ketoglutarate) via the thiamine diphosphate (ThDP) cofactor and subsequent t…	5.0	heat shock protein binding [GO:0031072]; metal ion binding [GO:0046872]; oxoglutarate dehydrogenase (NAD+) activity [GO:0034602]; oxoglutarate dehydrogenase (succinyl-transferring) activity [GO:0004591]; protein-folding chaperone binding [GO:0051087]; thiamine pyrophosphate binding [GO:0030976]	2-oxoglutarate metabolic process [GO:0006103]; cerebellar cortex development [GO:0021695]; generation of precursor metabolites and energy [GO:0006091]; glycolytic process [GO:0006096]; hippocampus development [GO:0021766]; histone succinylation [GO:0106077]; NADH metabolic process [GO:0006734]; olfactory bulb mitral cell layer development [GO:0061034]; pyramidal neuron development [GO:0021860]; s…
[619]		P50136	4	4	14.3					50371.1	MOUSE	2-oxoisovalerate dehydrogenase subunit alpha, mitochondrial					P50136	P50136	reviewed	ODBA_MOUSE	2-oxoisovalerate dehydrogenase subunit alpha, mitochondrial (EC 1.2.4.4) (Branched-chain alpha-keto acid dehydrogenase E1 component alpha chain) (BCKDE1A) (BCKDH E1-alpha)	Bckdha	Mus musculus (Mouse)	442	FUNCTION: The branched-chain alpha-keto dehydrogenase complex catalyzes the overall conversion of alpha-keto acids to acyl-CoA and CO(2). It contains multiple copies of three enzymatic components: branched-chain alpha-keto acid decarboxylase (E1), lipoamide acyltransferase (E2) and lipoamide dehydrogenase (E3).	4.0	3-methyl-2-oxobutanoate dehydrogenase (2-methylpropanoyl-transferring) activity [GO:0003863]; metal ion binding [GO:0046872]; protein-containing complex binding [GO:0044877]	branched-chain amino acid catabolic process [GO:0009083]
[834]		Q6P3A8	2	5	9.5					42880.7	MOUSE	2-oxoisovalerate dehydrogenase subunit beta, mitochondrial					Q6P3A8	Q6P3A8	reviewed	ODBB_MOUSE	2-oxoisovalerate dehydrogenase subunit beta, mitochondrial (EC 1.2.4.4) (Branched-chain alpha-keto acid dehydrogenase E1 component beta chain) (BCKDE1B) (BCKDH E1-beta)	Bckdhb	Mus musculus (Mouse)	390	FUNCTION: The branched-chain alpha-keto dehydrogenase complex catalyzes the overall conversion of alpha-keto acids to acyl-CoA and CO(2). It contains multiple copies of three enzymatic components: branched-chain alpha-keto acid decarboxylase (E1), lipoamide acyltransferase (E2) and lipoamide dehydrogenase (E3).	5.0	3-methyl-2-oxobutanoate dehydrogenase (2-methylpropanoyl-transferring) activity [GO:0003863]; protein-containing complex binding [GO:0044877]	amino acid catabolic process [GO:0009063]; branched-chain amino acid catabolic process [GO:0009083]; lipid metabolic process [GO:0006629]; response to cAMP [GO:0051591]; response to glucocorticoid [GO:0051384]; response to nutrient [GO:0007584]
[1125]		Q99N96	1	1	6.3					37597	MOUSE	39S ribosomal protein L1, mitochondrial					Q99N96	Q99N96	reviewed	RM01_MOUSE	Large ribosomal subunit protein uL1m (39S ribosomal protein L1, mitochondrial) (L1mt) (MRP-L1)	Mrpl1	Mus musculus (Mouse)	336		2.0	RNA binding [GO:0003723]; structural constituent of ribosome [GO:0003735]	mitochondrial translation [GO:0032543]; translation [GO:0006412]
[1377]		Q99N95	1	1	2					39110.2	MOUSE	39S ribosomal protein L3, mitochondrial					Q99N95	Q99N95	reviewed	RM03_MOUSE	Large ribosomal subunit protein uL3m (39S ribosomal protein L3, mitochondrial) (L3mt) (MRP-L3)	Mrpl3	Mus musculus (Mouse)	348		2.0	structural constituent of ribosome [GO:0003735]	mitochondrial translation [GO:0032543]; translation [GO:0006412]
[1315]		Q8K2M0	1	1	1.8					45030.3	MOUSE	39S ribosomal protein L38, mitochondrial					Q8K2M0	Q8K2M0	reviewed	RM38_MOUSE	Large ribosomal subunit protein mL38 (39S ribosomal protein L38, mitochondrial) (L38mt) (MRP-L38)	Mrpl38	Mus musculus (Mouse)	380		3.0		mitochondrial translation [GO:0032543]
[1200]		Q9DCU6	1	1	5.4					33073.4	MOUSE	39S ribosomal protein L4, mitochondrial					Q9DCU6	Q9DCU6	reviewed	RM04_MOUSE	Large ribosomal subunit protein uL4m (39S ribosomal protein L4, mitochondrial) (L4mt) (MRP-L4)	Mrpl4 MNCb-3848	Mus musculus (Mouse)	294		3.0	structural constituent of ribosome [GO:0003735]	mitochondrial translation [GO:0032543]
[1357]		Q9Z2Q5				2	2	0	12.1	24301.2	MOUSE	39S ribosomal protein L40, mitochondrial					Q9Z2Q5	Q9Z2Q5	reviewed	RM40_MOUSE	Large ribosomal subunit protein mL40 (39S ribosomal protein L40, mitochondrial) (L40mt) (MRP-L40) (Nuclear localization signal-containing protein deleted in velocardiofacial syndrome homolog)	Mrpl40 Nlvcf	Mus musculus (Mouse)	206		3.0		mitochondrial translation [GO:0032543]
[1233]		Q9CY73	1	2	5.4					37527.6	MOUSE	39S ribosomal protein L44, mitochondrial					Q9CY73	Q9CY73	reviewed	RM44_MOUSE	Large ribosomal subunit protein mL44 (EC 3.1.26.-) (39S ribosomal protein L44, mitochondrial) (L44mt) (MRP-L44)	Mrpl44	Mus musculus (Mouse)	333	FUNCTION: Component of the 39S subunit of mitochondrial ribosome. May have a function in the assembly/stability of nascent mitochondrial polypeptides exiting the ribosome. {ECO:0000250|UniProtKB:Q9H9J2}.	4.0	double-stranded RNA binding [GO:0003725]; ribonuclease III activity [GO:0004525]; structural constituent of ribosome [GO:0003735]	mitochondrial translation [GO:0032543]; mitochondrial translational elongation [GO:0070125]; rRNA processing [GO:0006364]
[901]		O08756	1	2	7.7					27418.9	MOUSE	3-hydroxyacyl-CoA dehydrogenase type-2					O08756	O08756	reviewed	HCD2_MOUSE	3-hydroxyacyl-CoA dehydrogenase type-2 (EC 1.1.1.35) (17-beta-estradiol 17-dehydrogenase) (EC 1.1.1.62) (2-methyl-3-hydroxybutyryl-CoA dehydrogenase) (MHBD) (3-alpha-(17-beta)-hydroxysteroid dehydrogenase (NAD(+))) (EC 1.1.1.239) (3-hydroxy-2-methylbutyryl-CoA dehydrogenase) (EC 1.1.1.178) (3-hydroxyacyl-CoA dehydrogenase type II) (3alpha(or 20beta)-hydroxysteroid dehydrogenase) (EC 1.1.1.53) (7-…	Hsd17b10 Erab Hadh2	Mus musculus (Mouse)	261	FUNCTION: Mitochondrial dehydrogenase involved in pathways of fatty acid, branched-chain amino acid and steroid metabolism (By similarity). Acts as (S)-3-hydroxyacyl-CoA dehydrogenase in mitochondrial fatty acid beta-oxidation, a major degradation pathway of fatty acids. Catalyzes the third step in the beta-oxidation cycle, namely the reversible conversion of (S)-3-hydroxyacyl-CoA to 3-ketoacyl-C…	5.0	17-beta-hydroxysteroid dehydrogenase (NAD+) activity [GO:0044594]; 3-hydroxy-2-methylbutyryl-CoA dehydrogenase activity [GO:0047015]; 3-hydroxyacyl-CoA dehydrogenase activity [GO:0003857]; acetoacetyl-CoA reductase activity [GO:0018454]; amyloid-beta binding [GO:0001540]; androstan-3-alpha,17-beta-diol dehydrogenase activity [GO:0047044]; chenodeoxycholate 7-alpha-dehydrogenase (NAD+) activity [G…	androgen metabolic process [GO:0008209]; bile acid biosynthetic process [GO:0006699]; brexanolone metabolic process [GO:0062173]; C21-steroid hormone metabolic process [GO:0008207]; estrogen metabolic process [GO:0008210]; fatty acid beta-oxidation [GO:0006635]; fatty acid metabolic process [GO:0006631]; isoleucine catabolic process [GO:0006550]; mitochondrial tRNA 3'-end processing [GO:1990180];…
[434]		P63325	6	11	33.3	4	4	1.1968	18.8	18915.9	MOUSE	40S ribosomal protein S10					P63325	P63325	reviewed	RS10_MOUSE	Small ribosomal subunit protein eS10 (40S ribosomal protein S10)	Rps10	Mus musculus (Mouse)	165	FUNCTION: Component of the 40S ribosomal subunit (PubMed:36517592). The ribosome is a large ribonucleoprotein complex responsible for the synthesis of proteins in the cell (PubMed:36517592). {ECO:0000269|PubMed:36517592}.	5.0	RNA binding [GO:0003723]; structural constituent of ribosome [GO:0003735]; tRNA binding [GO:0000049]	cytoplasmic translation [GO:0002181]; translation at postsynapse [GO:0140242]; translation at presynapse [GO:0140236]
[344]		P62281	9	11	50	6	6	0.797865	36.7	18430.9	MOUSE	40S ribosomal protein S11					P62281	P62281	reviewed	RS11_MOUSE	Small ribosomal subunit protein uS17 (40S ribosomal protein S11)	Rps11	Mus musculus (Mouse)	158	FUNCTION: Component of the small ribosomal subunit (PubMed:36517592). The ribosome is a large ribonucleoprotein complex responsible for the synthesis of proteins in the cell (PubMed:36517592). Part of the small subunit (SSU) processome, first precursor of the small eukaryotic ribosomal subunit. During the assembly of the SSU processome in the nucleolus, many ribosome biogenesis factors, an RNA ch…	5.0	rRNA binding [GO:0019843]; structural constituent of ribosome [GO:0003735]	cytoplasmic translation [GO:0002181]; ribosomal small subunit biogenesis [GO:0042274]; translation at postsynapse [GO:0140242]; translation at presynapse [GO:0140236]
[451]		P63323	4	5	37.9					14525.1	MOUSE	40S ribosomal protein S12					P63323	P63323	reviewed	RS12_MOUSE	Small ribosomal subunit protein eS12 (40S ribosomal protein S12)	Rps12	Mus musculus (Mouse)	132	FUNCTION: Part of the small subunit (SSU) processome, first precursor of the small eukaryotic ribosomal subunit. During the assembly of the SSU processome in the nucleolus, many ribosome biogenesis factors, an RNA chaperone and ribosomal proteins associate with the nascent pre-rRNA and work in concert to generate RNA folding, modifications, rearrangements and cleavage as well as targeted degradat…	5.0	structural constituent of ribosome [GO:0003735]	cytoplasmic translation [GO:0002181]; positive regulation of canonical Wnt signaling pathway [GO:0090263]; ribosomal small subunit biogenesis [GO:0042274]; translation at postsynapse [GO:0140242]; translation at presynapse [GO:0140236]
[345]		P62301	9	15	46.4	5	8	0.815998	33.1	17222.4	MOUSE	40S ribosomal protein S13					P62301	P62301	reviewed	RS13_MOUSE	Small ribosomal subunit protein uS15 (40S ribosomal protein S13)	Rps13	Mus musculus (Mouse)	151	FUNCTION: Component of the small ribosomal subunit (PubMed:36517592). The ribosome is a large ribonucleoprotein complex responsible for the synthesis of proteins in the cell (PubMed:36517592). Part of the small subunit (SSU) processome, first precursor of the small eukaryotic ribosomal subunit. During the assembly of the SSU processome in the nucleolus, many ribosome biogenesis factors, an RNA ch…	5.0	5.8S rRNA binding [GO:1990932]; mRNA 5'-UTR binding [GO:0048027]; mRNA binding [GO:0003729]; small ribosomal subunit rRNA binding [GO:0070181]; structural constituent of ribosome [GO:0003735]	cytoplasmic translation [GO:0002181]; negative regulation of RNA splicing [GO:0033119]; ribosomal small subunit biogenesis [GO:0042274]
[453]		P62264	8	11	41.7	3	5	0.957438	16.6	16272.9	MOUSE	40S ribosomal protein S14					P62264	P62264	reviewed	RS14_MOUSE	Small ribosomal subunit protein uS11 (40S ribosomal protein S14)	Rps14	Mus musculus (Mouse)	151	FUNCTION: Component of the small ribosomal subunit (PubMed:36517592). The ribosome is a large ribonucleoprotein complex responsible for the synthesis of proteins in the cell (PubMed:36517592). Part of the small subunit (SSU) processome, first precursor of the small eukaryotic ribosomal subunit. During the assembly of the SSU processome in the nucleolus, many ribosome biogenesis factors, an RNA ch…	5.0	mRNA 5'-UTR binding [GO:0048027]; RNA binding [GO:0003723]; small ribosomal subunit rRNA binding [GO:0070181]; structural constituent of ribosome [GO:0003735]; translation regulator activity [GO:0045182]	cytoplasmic translation [GO:0002181]; erythrocyte differentiation [GO:0030218]; maturation of SSU-rRNA [GO:0030490]; maturation of SSU-rRNA from tricistronic rRNA transcript (SSU-rRNA, 5.8S rRNA, LSU-rRNA) [GO:0000462]; negative regulation of transcription by RNA polymerase II [GO:0000122]; ribosomal small subunit assembly [GO:0000028]; ribosomal small subunit biogenesis [GO:0042274]; translation…
[553]		P62843	5	12	51.7	3	3	1.7408	21.4	17040.3	MOUSE	40S ribosomal protein S15					P62843	P62843	reviewed	RS15_MOUSE	Small ribosomal subunit protein uS19 (40S ribosomal protein S15) (RIG protein)	Rps15 Rig	Mus musculus (Mouse)	145	FUNCTION: Component of the small ribosomal subunit (PubMed:36517592). The ribosome is a large ribonucleoprotein complex responsible for the synthesis of proteins in the cell (PubMed:36517592). {ECO:0000269|PubMed:36517592}.	5.0	MDM2/MDM4 family protein binding [GO:0097371]; RNA binding [GO:0003723]; structural constituent of ribosome [GO:0003735]; ubiquitin ligase inhibitor activity [GO:1990948]	cytoplasmic translation [GO:0002181]; liver regeneration [GO:0097421]; positive regulation of signal transduction by p53 class mediator [GO:1901798]; ribosomal small subunit assembly [GO:0000028]; ribosomal small subunit biogenesis [GO:0042274]; ribosomal small subunit export from nucleus [GO:0000056]; rRNA processing [GO:0006364]
[606]		P62245	7	9	56.9	3	3	1.3056	12.3	14839.6	MOUSE	40S ribosomal protein S15a					P62245	P62245	reviewed	RS15A_MOUSE	Small ribosomal subunit protein uS8 (40S ribosomal protein S15a)	Rps15a	Mus musculus (Mouse)	130	FUNCTION: Component of the small ribosomal subunit (PubMed:36517592). The ribosome is a large ribonucleoprotein complex responsible for the synthesis of proteins in the cell (PubMed:36517592). Part of the small subunit (SSU) processome, first precursor of the small eukaryotic ribosomal subunit. During the assembly of the SSU processome in the nucleolus, many ribosome biogenesis factors, an RNA ch…	5.0	structural constituent of ribosome [GO:0003735]	cytoplasmic translation [GO:0002181]; positive regulation of cell cycle [GO:0045787]; positive regulation of cell population proliferation [GO:0008284]; response to virus [GO:0009615]; ribosomal small subunit biogenesis [GO:0042274]; translation at postsynapse [GO:0140242]; translation at presynapse [GO:0140236]
[382]		P14131	9	13	47.3	7	14	0.404113	40.4	16445.5	MOUSE	40S ribosomal protein S16					P14131	P14131	reviewed	RS16_MOUSE	Small ribosomal subunit protein uS9 (40S ribosomal protein S16)	Rps16	Mus musculus (Mouse)	146	FUNCTION: Component of the small ribosomal subunit. The ribosome is a large ribonucleoprotein complex responsible for the synthesis of proteins in the cell (PubMed:36517592). Part of the small subunit (SSU) processome, first precursor of the small eukaryotic ribosomal subunit. During the assembly of the SSU processome in the nucleolus, many ribosome biogenesis factors, an RNA chaperone and riboso…	5.0	RNA binding [GO:0003723]; structural constituent of ribosome [GO:0003735]	cellular response to leukemia inhibitory factor [GO:1990830]; cytoplasmic translation [GO:0002181]; maturation of SSU-rRNA from tricistronic rRNA transcript (SSU-rRNA, 5.8S rRNA, LSU-rRNA) [GO:0000462]; ribosomal small subunit biogenesis [GO:0042274]; rRNA processing [GO:0006364]; translation at postsynapse [GO:0140242]; translation at presynapse [GO:0140236]
[349]		P63276	7	11	59.3	3	3	1.59573	16.3	15524.2	MOUSE	40S ribosomal protein S17					P63276	P63276	reviewed	RS17_MOUSE	Small ribosomal subunit protein eS17 (40S ribosomal protein S17)	Rps17	Mus musculus (Mouse)	135	FUNCTION: Component of the small ribosomal subunit (PubMed:36517592). The ribosome is a large ribonucleoprotein complex responsible for the synthesis of proteins in the cell (PubMed:36517592). Part of the small subunit (SSU) processome, first precursor of the small eukaryotic ribosomal subunit. During the assembly of the SSU processome in the nucleolus, many ribosome biogenesis factors, an RNA ch…	5.0	structural constituent of ribosome [GO:0003735]	cytoplasmic translation [GO:0002181]; erythrocyte homeostasis [GO:0034101]; ribosomal small subunit biogenesis [GO:0042274]; rRNA processing [GO:0006364]; translation [GO:0006412]
[379]		P62270	10	11	48	3	4	1.1968	19.7	17718.8	MOUSE	40S ribosomal protein S18					P62270	P62270	reviewed	RS18_MOUSE	Small ribosomal subunit protein uS13 (40S ribosomal protein S18) (Ke-3) (Ke3)	Rps18	Mus musculus (Mouse)	152	FUNCTION: Component of the small ribosomal subunit (PubMed:36517592). The ribosome is a large ribonucleoprotein complex responsible for the synthesis of proteins in the cell (PubMed:36517592). {ECO:0000269|PubMed:36517592}.	5.0	protein kinase binding [GO:0019901]; rRNA binding [GO:0019843]; structural constituent of ribosome [GO:0003735]	cytoplasmic translation [GO:0002181]
[373]		Q9CZX8	10	12	50.3	9	12	0.435199	44.8	16085.6	MOUSE	40S ribosomal protein S19					Q9CZX8	Q9CZX8	reviewed	RS19_MOUSE	Small ribosomal subunit protein eS19 (40S ribosomal protein S19)	Rps19	Mus musculus (Mouse)	145	FUNCTION: Component of the small ribosomal subunit (PubMed:36517592). The ribosome is a large ribonucleoprotein complex responsible for the synthesis of proteins in the cell (PubMed:36517592). Required for pre-rRNA processing and maturation of 40S ribosomal subunits (By similarity). Required for pre-rRNA processing and maturation of 40S ribosomal subunits. Part of the small subunit (SSU) processo…	5.0	fibroblast growth factor binding [GO:0017134]; identical protein binding [GO:0042802]; protein kinase binding [GO:0019901]; RNA binding [GO:0003723]; structural constituent of ribosome [GO:0003735]; translation initiation factor binding [GO:0031369]	antimicrobial humoral immune response mediated by antimicrobial peptide [GO:0061844]; cytoplasmic translation [GO:0002181]; defense response to Gram-negative bacterium [GO:0050829]; erythrocyte differentiation [GO:0030218]; killing of cells of another organism [GO:0031640]; maturation of SSU-rRNA [GO:0030490]; maturation of SSU-rRNA from tricistronic rRNA transcript (SSU-rRNA, 5.8S rRNA, LSU-rRNA…
[192]		P25444	13	18	46.1	8	9	0.870398	26.6	31231.6	MOUSE	40S ribosomal protein S2					P25444	P25444	reviewed	RS2_MOUSE	Small ribosomal subunit protein uS5 (40S ribosomal protein S2) (40S ribosomal protein S4) (Protein LLRep3)	Rps2 Llrep3 Rps4	Mus musculus (Mouse)	293	FUNCTION: Component of the ribosome, a large ribonucleoprotein complex responsible for the synthesis of proteins in the cell (PubMed:36517592). The small ribosomal subunit (SSU) binds messenger RNAs (mRNAs) and translates the encoded message by selecting cognate aminoacyl-transfer RNA (tRNA) molecules (PubMed:36517592). The large subunit (LSU) contains the ribosomal catalytic site termed the pept…	5.0	enzyme binding [GO:0019899]; fibroblast growth factor binding [GO:0017134]; mRNA binding [GO:0003729]; protein-containing complex binding [GO:0044877]; structural constituent of ribosome [GO:0003735]	cellular response to interleukin-4 [GO:0071353]; cytoplasmic translation [GO:0002181]; positive regulation of ubiquitin-protein transferase activity [GO:0051443]; translation [GO:0006412]
[898]		P60867	2	4	22.7	4	5	0.348159	33.6	13372.8	MOUSE	40S ribosomal protein S20					P60867	P60867	reviewed	RS20_MOUSE	Small ribosomal subunit protein uS10 (40S ribosomal protein S20)	Rps20	Mus musculus (Mouse)	119	FUNCTION: Component of the small ribosomal subunit (PubMed:36517592). The ribosome is a large ribonucleoprotein complex responsible for the synthesis of proteins in the cell (PubMed:36517592). {ECO:0000269|PubMed:36517592}.	5.0	MDM2/MDM4 family protein binding [GO:0097371]; RNA binding [GO:0003723]; structural constituent of ribosome [GO:0003735]; ubiquitin ligase inhibitor activity [GO:1990948]	cytoplasmic translation [GO:0002181]; positive regulation of signal transduction by p53 class mediator [GO:1901798]
[595]		P62267	5	8	30.1	4	6	0.580265	29.4	15807.7	MOUSE	40S ribosomal protein S23					P62267	P62267	reviewed	RS23_MOUSE	Small ribosomal subunit protein uS12 (40S ribosomal protein S23)	Rps23	Mus musculus (Mouse)	143	FUNCTION: Component of the ribosome, a large ribonucleoprotein complex responsible for the synthesis of proteins in the cell (PubMed:36517592). The small ribosomal subunit (SSU) binds messenger RNAs (mRNAs) and translates the encoded message by selecting cognate aminoacyl-transfer RNA (tRNA) molecules (PubMed:36517592). The large subunit (LSU) contains the ribosomal catalytic site termed the pept…	5.0	structural constituent of ribosome [GO:0003735]	cytoplasmic translation [GO:0002181]; maintenance of translational fidelity [GO:1990145]; ribosomal small subunit biogenesis [GO:0042274]; stress granule assembly [GO:0034063]; translation [GO:0006412]
[583]		P62849	5	6	35.3	1	2	1.3056	11.3	15423.3	MOUSE	40S ribosomal protein S24					P62849	P62849	reviewed	RS24_MOUSE	Small ribosomal subunit protein eS24 (40S ribosomal protein S24)	Rps24	Mus musculus (Mouse)	133	FUNCTION: Component of the small ribosomal subunit (PubMed:36517592). The ribosome is a large ribonucleoprotein complex responsible for the synthesis of proteins in the cell (PubMed:36517592). Required for processing of pre-rRNA and maturation of 40S ribosomal subunits (By similarity). Part of the small subunit (SSU) processome, first precursor of the small eukaryotic ribosomal subunit. During th…	5.0	structural constituent of ribosome [GO:0003735]; translation initiation factor binding [GO:0031369]	cytoplasmic translation [GO:0002181]; erythrocyte homeostasis [GO:0034101]; ribosomal small subunit biogenesis [GO:0042274]; rRNA processing [GO:0006364]; translation [GO:0006412]; translation at postsynapse [GO:0140242]; translation at presynapse [GO:0140236]
[680]		P62852	4	5	22.4	5	12	0.181333	29.6	13742.2	MOUSE	40S ribosomal protein S25					P62852	P62852	reviewed	RS25_MOUSE	Small ribosomal subunit protein eS25 (40S ribosomal protein S25)	Rps25	Mus musculus (Mouse)	125	FUNCTION: Component of the small ribosomal subunit (PubMed:36517592). The ribosome is a large ribonucleoprotein complex responsible for the synthesis of proteins in the cell (PubMed:36517592). {ECO:0000269|PubMed:36517592}.	5.0	structural constituent of ribosome [GO:0003735]	cytoplasmic translation [GO:0002181]; ribosomal small subunit assembly [GO:0000028]; ribosomal small subunit biogenesis [GO:0042274]; rRNA processing [GO:0006364]
[764]		P62855	4	6	40	3	5	0.522239	27	13015.5	MOUSE	40S ribosomal protein S26					P62855	P62855	reviewed	RS26_MOUSE	Small ribosomal subunit protein eS26 (40S ribosomal protein S26)	Rps26	Mus musculus (Mouse)	115	FUNCTION: Component of the small ribosomal subunit (PubMed:36517592). The ribosome is a large ribonucleoprotein complex responsible for the synthesis of proteins in the cell (PubMed:36517592). {ECO:0000269|PubMed:36517592}.	5.0	mRNA binding [GO:0003729]; structural constituent of ribosome [GO:0003735]	cytoplasmic translation [GO:0002181]; negative regulation of RNA splicing [GO:0033119]; translation at postsynapse [GO:0140242]; translation at presynapse [GO:0140236]
[849]		Q6ZWU9	2	4	25					9461.2	MOUSE	40S ribosomal protein S27					Q6ZWU9	Q6ZWU9	reviewed	RS27_MOUSE	Small ribosomal subunit protein eS27 (40S ribosomal protein S27)	Rps27	Mus musculus (Mouse)	84	FUNCTION: Component of the small ribosomal subunit (PubMed:36517592). The ribosome is a large ribonucleoprotein complex responsible for the synthesis of proteins in the cell (PubMed:36517592). Required for proper rRNA processing and maturation of 18S rRNAs (By similarity). Part of the small subunit (SSU) processome, first precursor of the small eukaryotic ribosomal subunit. During the assembly of…	5.0	metal ion binding [GO:0046872]; RNA binding [GO:0003723]; structural constituent of ribosome [GO:0003735]	ribosomal small subunit assembly [GO:0000028]; ribosomal small subunit biogenesis [GO:0042274]; rRNA processing [GO:0006364]; translation at postsynapse [GO:0140242]; translation at presynapse [GO:0140236]
[74]		P62908	28	54	88.5	12	13	1.80775	44.9	26674.5	MOUSE	40S ribosomal protein S3					P62908	P62908	reviewed	RS3_MOUSE	Small ribosomal subunit protein uS3 (EC 4.2.99.18) (40S ribosomal protein S3)	Rps3	Mus musculus (Mouse)	243	FUNCTION: Component of the small ribosomal subunit (PubMed:36517592). The ribosome is a large ribonucleoprotein complex responsible for the synthesis of proteins in the cell (PubMed:36517592). Has endonuclease activity and plays a role in repair of damaged DNA (PubMed:7775413). Cleaves phosphodiester bonds of DNAs containing altered bases with broad specificity and cleaves supercoiled DNA more ef…	5.0	class I DNA-(apurinic or apyrimidinic site) endonuclease activity [GO:0140078]; damaged DNA binding [GO:0003684]; DNA binding [GO:0003677]; DNA endonuclease activity [GO:0004520]; DNA-(apurinic or apyrimidinic site) endonuclease activity [GO:0003906]; DNA-binding transcription factor binding [GO:0140297]; enzyme binding [GO:0019899]; Hsp70 protein binding [GO:0030544]; Hsp90 protein binding [GO:0…	apoptotic process [GO:0006915]; cell division [GO:0051301]; cellular response to hydrogen peroxide [GO:0070301]; cellular response to nerve growth factor stimulus [GO:1990090]; cellular response to reactive oxygen species [GO:0034614]; cellular response to tumor necrosis factor [GO:0071356]; chromosome segregation [GO:0007059]; cytoplasmic translation [GO:0002181]; DNA damage response [GO:0006974…
[93]		P97351	23	32	65.5	7	8	1.7408	23.1	29885.1	MOUSE	40S ribosomal protein S3a					P97351	P97351	reviewed	RS3A_MOUSE	Small ribosomal subunit protein eS1 (40S ribosomal protein S3a) (Protein TU-11)	Rps3a Rps3a1	Mus musculus (Mouse)	264	FUNCTION: Component of the small ribosomal subunit (PubMed:36517592). The ribosome is a large ribonucleoprotein complex responsible for the synthesis of proteins in the cell (PubMed:36517592). Part of the small subunit (SSU) processome, first precursor of the small eukaryotic ribosomal subunit. During the assembly of the SSU processome in the nucleolus, many ribosome biogenesis factors, an RNA ch…	5.0	mRNA 5'-UTR binding [GO:0048027]; mRNA binding [GO:0003729]; structural constituent of ribosome [GO:0003735]; translation initiation factor binding [GO:0031369]	cell differentiation [GO:0030154]; cytoplasmic translation [GO:0002181]; negative regulation of apoptotic process [GO:0043066]; ribosomal small subunit biogenesis [GO:0042274]; translation [GO:0006412]
[125]		P62702	24	33	72.6	1	1	14.3616	4.9	29598	MOUSE	40S ribosomal protein S4, X isoform					P62702	P62702	reviewed	RS4X_MOUSE	Small ribosomal subunit protein eS4 (40S ribosomal protein S4, X isoform)	Rps4x Rps4	Mus musculus (Mouse)	263	FUNCTION: Component of the small ribosomal subunit (PubMed:36517592). The ribosome is a large ribonucleoprotein complex responsible for the synthesis of proteins in the cell (PubMed:36517592). Part of the small subunit (SSU) processome, first precursor of the small eukaryotic ribosomal subunit. During the assembly of the SSU processome in the nucleolus, many ribosome biogenesis factors, an RNA ch…	5.0	RNA binding [GO:0003723]; rRNA binding [GO:0019843]; structural constituent of ribosome [GO:0003735]	cytoplasmic translation [GO:0002181]; positive regulation of cell population proliferation [GO:0008284]; positive regulation of translation [GO:0045727]; ribosomal small subunit biogenesis [GO:0042274]; translation [GO:0006412]
[333]		P97461	9	12	38.2					22889.6	MOUSE	40S ribosomal protein S5					P97461	P97461	reviewed	RS5_MOUSE	Small ribosomal subunit protein uS7 (40S ribosomal protein S5) [Cleaved into: Small ribosomal subunit protein uS7, N-terminally processed]	Rps5	Mus musculus (Mouse)	204	FUNCTION: Component of the small ribosomal subunit (PubMed:36517592). The ribosome is a large ribonucleoprotein complex responsible for the synthesis of proteins in the cell (PubMed:36517592). Part of the small subunit (SSU) processome, first precursor of the small eukaryotic ribosomal subunit. During the assembly of the SSU processome in the nucleolus, many ribosome biogenesis factors, an RNA ch…	5.0	mRNA binding [GO:0003729]; rRNA binding [GO:0019843]; structural constituent of ribosome [GO:0003735]	cytoplasmic translation [GO:0002181]; regulation of translational fidelity [GO:0006450]; ribosomal small subunit assembly [GO:0000028]; ribosomal small subunit biogenesis [GO:0042274]; translation [GO:0006412]; translation at postsynapse [GO:0140242]; translation at presynapse [GO:0140236]
[292]		P62754	8	10	26.1	1	2	2.17599	4.8	28680.9	MOUSE	40S ribosomal protein S6					P62754	P62754	reviewed	RS6_MOUSE	Small ribosomal subunit protein eS6 (40S ribosomal protein S6) (Phosphoprotein NP33)	Rps6	Mus musculus (Mouse)	249	FUNCTION: Component of the 40S small ribosomal subunit. Plays an important role in controlling cell growth and proliferation through the selective translation of particular classes of mRNA (PubMed:36517592). Part of the small subunit (SSU) processome, first precursor of the small eukaryotic ribosomal subunit. During the assembly of the SSU processome in the nucleolus, many ribosome biogenesis fac…	5.0	mRNA binding [GO:0003729]; protein kinase binding [GO:0019901]; structural constituent of ribosome [GO:0003735]	activation-induced cell death of T cells [GO:0006924]; cellular response to ethanol [GO:0071361]; cytoplasmic translation [GO:0002181]; erythrocyte development [GO:0048821]; G1/S transition of mitotic cell cycle [GO:0000082]; gastrulation [GO:0007369]; glucose homeostasis [GO:0042593]; mammalian oogenesis stage [GO:0022605]; mitotic cell cycle [GO:0000278]; negative regulation of apoptotic proces…
[144]		P62082	14	26	70.1					22127	MOUSE	40S ribosomal protein S7					P62082	P62082	reviewed	RS7_MOUSE	Small ribosomal subunit protein eS7 (40S ribosomal protein S7)	Rps7	Mus musculus (Mouse)	194	FUNCTION: Component of the small ribosomal subunit (PubMed:36517592). The ribosome is a large ribonucleoprotein complex responsible for the synthesis of proteins in the cell (PubMed:36517592). Required for rRNA maturation (By similarity). Part of the small subunit (SSU) processome, first precursor of the small eukaryotic ribosomal subunit. During the assembly of the SSU processome in the nucleolu…	5.0	mRNA 3'-UTR binding [GO:0003730]; mRNA 5'-UTR binding [GO:0048027]; poly(U) RNA binding [GO:0008266]; protein kinase binding [GO:0019901]; structural constituent of ribosome [GO:0003735]; ubiquitin ligase inhibitor activity [GO:1990948]	cytoplasmic translation [GO:0002181]; negative regulation of ubiquitin protein ligase activity [GO:1904667]; negative regulation of ubiquitin-dependent protein catabolic process [GO:2000059]; neural crest cell differentiation [GO:0014033]; neural tube closure [GO:0001843]; positive regulation of gene expression [GO:0010628]; positive regulation of intrinsic apoptotic signaling pathway by p53 clas…
[225]		P62242	11	16	44.2	2	2	3.48159	11.5	24205.4	MOUSE	40S ribosomal protein S8					P62242	P62242	reviewed	RS8_MOUSE	Small ribosomal subunit protein eS8 (40S ribosomal protein S8)	Rps8	Mus musculus (Mouse)	208	FUNCTION: Component of the small ribosomal subunit (PubMed:36517592). The ribosome is a large ribonucleoprotein complex responsible for the synthesis of proteins in the cell (PubMed:36517592). Part of the small subunit (SSU) processome, first precursor of the small eukaryotic ribosomal subunit. During the assembly of the SSU processome in the nucleolus, many ribosome biogenesis factors, an RNA ch…	5.0	structural constituent of ribosome [GO:0003735]	cytoplasmic translation [GO:0002181]; maturation of SSU-rRNA from tricistronic rRNA transcript (SSU-rRNA, 5.8S rRNA, LSU-rRNA) [GO:0000462]; ribosomal small subunit biogenesis [GO:0042274]
[289]		Q6ZWN5	19	23	53.6					22591.6	MOUSE	40S ribosomal protein S9					Q6ZWN5	Q6ZWN5	reviewed	RS9_MOUSE	Small ribosomal subunit protein uS4 (40S ribosomal protein S9)	Rps9	Mus musculus (Mouse)	194	FUNCTION: Component of the small ribosomal subunit (PubMed:36517592). The ribosome is a large ribonucleoprotein complex responsible for the synthesis of proteins in the cell (PubMed:36517592). Part of the small subunit (SSU) processome, first precursor of the small eukaryotic ribosomal subunit. During the assembly of the SSU processome in the nucleolus, many ribosome biogenesis factors, an RNA ch…	5.0	5.8S rRNA binding [GO:1990932]; rRNA binding [GO:0019843]; structural constituent of ribosome [GO:0003735]; translation regulator activity [GO:0045182]	cytoplasmic translation [GO:0002181]; positive regulation of cell population proliferation [GO:0008284]; ribosomal small subunit biogenesis [GO:0042274]; translation [GO:0006412]
[161]		P14206	14	31	54.6	6	11	1.22647	19.7	32838.4	MOUSE	40S ribosomal protein SA					P14206	P14206	reviewed	RSSA_MOUSE	Small ribosomal subunit protein uS2 (37 kDa laminin receptor precursor) (37LRP) (37 kDa oncofetal antigen) (37/67 kDa laminin receptor) (LRP/LR) (40S ribosomal protein SA) (67 kDa laminin receptor) (67LR) (Laminin receptor 1) (LamR) (Laminin-binding protein precursor p40) (LBP/p40) (OFA/iLRP)	Rpsa Lamr1 P40-8	Mus musculus (Mouse)	295	FUNCTION: Required for the assembly and/or stability of the 40S ribosomal subunit. Required for the processing of the 20S rRNA-precursor to mature 18S rRNA in a late step of the maturation of 40S ribosomal subunits. Also functions as a cell surface receptor for laminin. Plays a role in cell adhesion to the basement membrane and in the consequent activation of signaling transduction pathways. May …	5.0	laminin binding [GO:0043236]; laminin receptor activity [GO:0005055]; ribosome binding [GO:0043022]; structural constituent of ribosome [GO:0003735]	cell-cell adhesion [GO:0098609]; cytoplasmic translation [GO:0002181]; ribosomal small subunit assembly [GO:0000028]
[177]		Q9JLJ2	16	20	43.7					53515.2	MOUSE	4-trimethylaminobutyraldehyde dehydrogenase					Q9JLJ2	Q9JLJ2	reviewed	AL9A1_MOUSE	4-trimethylaminobutyraldehyde dehydrogenase (TMABA-DH) (TMABADH) (EC 1.2.1.47) (Aldehyde dehydrogenase family 9 member A1) (EC 1.2.1.3)	Aldh9a1	Mus musculus (Mouse)	494	FUNCTION: Converts gamma-trimethylaminobutyraldehyde into gamma-butyrobetaine with high efficiency (in vitro). Can catalyze the irreversible oxidation of a broad range of aldehydes to the corresponding acids in an NAD-dependent reaction, but with low efficiency. {ECO:0000250|UniProtKB:P49189}.	5.0	4-trimethylammoniobutyraldehyde dehydrogenase activity [GO:0047105]; aldehyde dehydrogenase (NAD+) activity [GO:0004029]; amine binding [GO:0043176]; aminobutyraldehyde dehydrogenase activity [GO:0019145]; glyceraldehyde-3-phosphate dehydrogenase (NAD+) (non-phosphorylating) activity [GO:0043878]; identical protein binding [GO:0042802]; NAD binding [GO:0051287]; oxidoreductase activity, acting on…	carnitine biosynthetic process [GO:0045329]; carnitine metabolic process [GO:0009437]; cellular aldehyde metabolic process [GO:0006081]; neurotransmitter biosynthetic process [GO:0042136]; protein homotetramerization [GO:0051289]
[217]		Q9DBR1	2	2	4	15	16	0.0543999	18.1	108688	MOUSE	5'-3' exoribonuclease 2					Q9DBR1	Q9DBR1	reviewed	XRN2_MOUSE	5'-3' exoribonuclease 2 (EC 3.1.13.-) (Protein Dhm1)	Xrn2 Dhm1	Mus musculus (Mouse)	951	FUNCTION: Possesses 5'->3' exoribonuclease activity. May promote the termination of transcription by RNA polymerase II. During transcription termination, cleavage at the polyadenylation site liberates a 5' fragment which is subsequently processed to form the mature mRNA and a 3' fragment which remains attached to the elongating polymerase. The processive degradation of this 3' fragment by this pr…	5.0	3'-5'-RNA exonuclease activity [GO:0000175]; 5'-3' exonuclease activity [GO:0008409]; 5'-3' RNA exonuclease activity [GO:0004534]; identical protein binding [GO:0042802]; metal ion binding [GO:0046872]; RNA binding [GO:0003723]; transcription termination site sequence-specific DNA binding [GO:0001147]	DNA recombination [GO:0006310]; DNA repair [GO:0006281]; hippocampus development [GO:0021766]; microtubule-based process [GO:0007017]; mRNA processing [GO:0006397]; neuron differentiation [GO:0030182]; nuclear-transcribed mRNA catabolic process [GO:0000956]; retina development in camera-type eye [GO:0060041]; RNA metabolic process [GO:0016070]; spermatogenesis [GO:0007283]; termination of RNA pol…
[1329]		Q6PAM0	1	1	3.7					30209.4	MOUSE	5'-AMP-activated protein kinase subunit beta-2					Q6PAM0	Q6PAM0	reviewed	AAKB2_MOUSE	5'-AMP-activated protein kinase subunit beta-2 (AMPK subunit beta-2)	Prkab2	Mus musculus (Mouse)	271	FUNCTION: Non-catalytic subunit of AMP-activated protein kinase (AMPK), an energy sensor protein kinase that plays a key role in regulating cellular energy metabolism. In response to reduction of intracellular ATP levels, AMPK activates energy-producing pathways and inhibits energy-consuming processes: inhibits protein, carbohydrate and lipid biosynthesis, as well as cell growth and proliferation…	4.0	AMP-activated protein kinase activity [GO:0004679]; enzyme binding [GO:0019899]; protein kinase binding [GO:0019901]	cellular response to nutrient levels [GO:0031669]; fatty acid biosynthetic process [GO:0006633]; positive regulation of cold-induced thermogenesis [GO:0120162]; signal transduction [GO:0007165]
[343]		O54950	9	11	36.4					37520.7	MOUSE	5'-AMP-activated protein kinase subunit gamma-1					O54950	O54950	reviewed	AAKG1_MOUSE	5'-AMP-activated protein kinase subunit gamma-1 (AMPK gamma1) (AMPK subunit gamma-1) (AMPKg)	Prkag1 Prkaac	Mus musculus (Mouse)	330	FUNCTION: AMP/ATP-binding subunit of AMP-activated protein kinase (AMPK), an energy sensor protein kinase that plays a key role in regulating cellular energy metabolism. In response to reduction of intracellular ATP levels, AMPK activates energy-producing pathways and inhibits energy-consuming processes: inhibits protein, carbohydrate and lipid biosynthesis, as well as cell growth and proliferati…	5.0	ADP binding [GO:0043531]; AMP binding [GO:0016208]; AMP-activated protein kinase activity [GO:0004679]; ATP binding [GO:0005524]; protein kinase activity [GO:0004672]; protein kinase binding [GO:0019901]; protein kinase regulator activity [GO:0019887]; protein-containing complex binding [GO:0044877]	cellular response to nutrient levels [GO:0031669]; fatty acid biosynthetic process [GO:0006633]; import into nucleus [GO:0051170]; positive regulation of gene expression [GO:0010628]; protein phosphorylation [GO:0006468]; regulation of catalytic activity [GO:0050790]
[142]		P63038	5	6	12.2	19	21	0.124343	36.5	60956	MOUSE	60 kDa heat shock protein, mitochondrial					P63038	P63038	reviewed	CH60_MOUSE	60 kDa heat shock protein, mitochondrial (EC 5.6.1.7) (60 kDa chaperonin) (Chaperonin 60) (CPN60) (HSP-65) (Heat shock protein 60) (HSP-60) (Hsp60) (Mitochondrial matrix protein P1)	Hspd1 Hsp60	Mus musculus (Mouse)	573	FUNCTION: Chaperonin implicated in mitochondrial protein import and macromolecular assembly. Together with Hsp10, facilitates the correct folding of imported proteins. May also prevent misfolding and promote the refolding and proper assembly of unfolded polypeptides generated under stress conditions in the mitochondrial matrix. The functional units of these chaperonins consist of heptameric rings…	5.0	apolipoprotein A-I binding [GO:0034186]; apolipoprotein binding [GO:0034185]; ATP binding [GO:0005524]; ATP-dependent protein folding chaperone [GO:0140662]; double-stranded RNA binding [GO:0003725]; enzyme binding [GO:0019899]; high-density lipoprotein particle binding [GO:0008035]; isomerase activity [GO:0016853]; lipopolysaccharide binding [GO:0001530]; modification-dependent protein binding […	activation of cysteine-type endopeptidase activity involved in apoptotic process [GO:0006919]; apoptotic mitochondrial changes [GO:0008637]; B cell activation [GO:0042113]; B cell proliferation [GO:0042100]; biological process involved in interaction with symbiont [GO:0051702]; cellular response to interleukin-7 [GO:0098761]; isotype switching to IgG isotypes [GO:0048291]; mitochondrial unfolded …
[1059]		O08848	1	1	2.4					60124.4	MOUSE	60 kDa SS-A/Ro ribonucleoprotein					O08848	O08848	reviewed	RO60_MOUSE	RNA-binding protein Ro60 (60 kDa SS-A/Ro ribonucleoprotein) (60 kDa Ro protein) (60 kDa ribonucleoprotein Ro) (RoRNP) (TROVE domain family member 2)	RO60 Ssa2 Trove2	Mus musculus (Mouse)	538	FUNCTION: RNA-binding protein that binds to misfolded non-coding RNAs, pre-5S rRNA, and several small cytoplasmic RNA molecules known as Y RNAs (By similarity). May play roles in cilia formation and/or maintenance (PubMed:21289087). {ECO:0000250|UniProtKB:P10155, ECO:0000269|PubMed:21289087}.	5.0	metal ion binding [GO:0046872]; misfolded RNA binding [GO:0034336]; RNA binding [GO:0003723]; U2 snRNA binding [GO:0030620]	cellular response to interferon-alpha [GO:0035457]; cilium assembly [GO:0060271]; immune system development [GO:0002520]; regulation of gene expression [GO:0010468]; response to UV [GO:0009411]; smoothened signaling pathway [GO:0007224]
[147]		P14869	18	31	61.8	11	12	1.12426	42.3	34216.7	MOUSE	60S acidic ribosomal protein P0					P14869	P14869	reviewed	RLA0_MOUSE	Large ribosomal subunit protein uL10 (60S acidic ribosomal protein P0) (60S ribosomal protein L10E)	Rplp0 Arbp	Mus musculus (Mouse)	317	FUNCTION: Ribosomal protein P0 is the functional equivalent of E.coli protein L10.	5.0	large ribosomal subunit rRNA binding [GO:0070180]; peptide binding [GO:0042277]; structural constituent of ribosome [GO:0003735]	cellular response to interleukin-4 [GO:0071353]; cytoplasmic translation [GO:0002181]; ribosomal large subunit assembly [GO:0000027]
[852]		P47955	2	3	37.7					11475	MOUSE	60S acidic ribosomal protein P1					P47955	P47955	reviewed	RLA1_MOUSE	Large ribosomal subunit protein P1 (60S acidic ribosomal protein P1)	Rplp1	Mus musculus (Mouse)	114	FUNCTION: Plays an important role in the elongation step of protein synthesis.	5.0	protein kinase activator activity [GO:0030295]; ribonucleoprotein complex binding [GO:0043021]; structural constituent of ribosome [GO:0003735]	cytoplasmic translation [GO:0002181]; regulation of translation [GO:0006417]; translational elongation [GO:0006414]
[1063]		P99027				1	1	0	10.4	11651	MOUSE	60S acidic ribosomal protein P2					P99027	P99027	reviewed	RLA2_MOUSE	Large ribosomal subunit protein P2 (60S acidic ribosomal protein P2)	Rplp2	Mus musculus (Mouse)	115	FUNCTION: Plays an important role in the elongation step of protein synthesis.	4.0	iron ion binding [GO:0005506]; ribonucleoprotein complex binding [GO:0043021]; structural constituent of ribosome [GO:0003735]	cytoplasmic translation [GO:0002181]; cytoplasmic translational elongation [GO:0002182]; translation at postsynapse [GO:0140242]; translation at presynapse [GO:0140236]
[730]		Q99L48	3	3	7.8					57611.7	MOUSE	60S ribosomal export protein NMD3					Q99L48	Q99L48	reviewed	NMD3_MOUSE	60S ribosomal export protein NMD3	Nmd3	Mus musculus (Mouse)	503	FUNCTION: Acts as an adapter for the XPO1/CRM1-mediated export of the 60S ribosomal subunit. {ECO:0000250|UniProtKB:Q96D46}.	3.0	protein-macromolecule adaptor activity [GO:0030674]; ribosomal large subunit binding [GO:0043023]	positive regulation of protein binding [GO:0032092]; positive regulation of protein localization to nucleolus [GO:1904751]; positive regulation of RNA biosynthetic process [GO:1902680]; protein transport [GO:0015031]; ribosomal large subunit export from nucleus [GO:0000055]
[295]		Q6ZWV3	10	13	45.8					24604.1	MOUSE	60S ribosomal protein L10					Q6ZWV3	Q6ZWV3	reviewed	RL10_MOUSE	Large ribosomal subunit protein uL16 (60S ribosomal protein L10) (Protein QM homolog) (Ribosomal protein L10)	Rpl10 Qm	Mus musculus (Mouse)	214	FUNCTION: Component of the large ribosomal subunit. Plays a role in the formation of actively translating ribosomes (PubMed:36517592). May play a role in the embryonic brain development (By similarity). {ECO:0000250|UniProtKB:P27635, ECO:0000269|PubMed:36517592}.	5.0	structural constituent of ribosome [GO:0003735]; translation regulator activity [GO:0045182]	embryonic brain development [GO:1990403]; liver regeneration [GO:0097421]; negative regulation of apoptotic process [GO:0043066]; negative regulation of transcription by RNA polymerase II [GO:0000122]; regulation of translation [GO:0006417]; ribosomal large subunit assembly [GO:0000027]; translation [GO:0006412]; translation at postsynapse [GO:0140242]; translation at presynapse [GO:0140236]
[375]		P53026	11	15	35.5					24916.6	MOUSE	60S ribosomal protein L10a					P53026	P53026	reviewed	RL10A_MOUSE	Large ribosomal subunit protein uL1 (60S ribosomal protein L10a) (CSA-19) (Neural precursor cell expressed developmentally down-regulated protein 6) (NEDD-6)	Rpl10a Nedd-6 Nedd6	Mus musculus (Mouse)	217	FUNCTION: Component of the large ribosomal subunit. The ribosome is a large ribonucleoprotein complex responsible for the synthesis of proteins in the cell. {ECO:0000250|UniProtKB:P62906}.	5.0	RNA binding [GO:0003723]; structural constituent of ribosome [GO:0003735]	cytoplasmic translation [GO:0002181]; translation [GO:0006412]; translation at postsynapse [GO:0140242]; translation at presynapse [GO:0140236]
[463]		Q9CXW4	7	9	31.5	5	7	0.559541	28.7	20252.6	MOUSE	60S ribosomal protein L11					Q9CXW4	Q9CXW4	reviewed	RL11_MOUSE	Large ribosomal subunit protein uL5 (60S ribosomal protein L11)	Rpl11	Mus musculus (Mouse)	178	FUNCTION: Component of the ribosome, a large ribonucleoprotein complex responsible for the synthesis of proteins in the cell (PubMed:36517592). The small ribosomal subunit (SSU) binds messenger RNAs (mRNAs) and translates the encoded message by selecting cognate aminoacyl-transfer RNA (tRNA) molecules (PubMed:36517592). The large subunit (LSU) contains the ribosomal catalytic site termed the pept…	5.0	5S rRNA binding [GO:0008097]; peroxisome proliferator activated receptor binding [GO:0042975]; RNA binding [GO:0003723]; structural constituent of ribosome [GO:0003735]; ubiquitin ligase inhibitor activity [GO:1990948]; ubiquitin protein ligase binding [GO:0031625]	cytoplasmic translation [GO:0002181]; negative regulation of DNA-binding transcription factor activity [GO:0043433]; negative regulation of proteasomal ubiquitin-dependent protein catabolic process [GO:0032435]; negative regulation of protein neddylation [GO:2000435]; negative regulation of ubiquitin protein ligase activity [GO:1904667]; negative regulation of ubiquitin-dependent protein cataboli…
[320]		P35979	9	11	66.1	6	8	0.598398	35.8	17804.7	MOUSE	60S ribosomal protein L12					P35979	P35979	reviewed	RL12_MOUSE	Large ribosomal subunit protein uL11 (60S ribosomal protein L12)	Rpl12	Mus musculus (Mouse)	165	FUNCTION: Binds directly to 26S ribosomal RNA.	5.0	large ribosomal subunit rRNA binding [GO:0070180]; structural constituent of ribosome [GO:0003735]	cytoplasmic translation [GO:0002181]; translation [GO:0006412]; translation at postsynapse [GO:0140242]; translation at presynapse [GO:0140236]
[462]		P47963	10	12	38.9					24305.7	MOUSE	60S ribosomal protein L13					P47963	P47963	reviewed	RL13_MOUSE	Large ribosomal subunit protein eL13 (60S ribosomal protein L13) (A52)	Rpl13	Mus musculus (Mouse)	211	FUNCTION: Component of the large ribosomal subunit (PubMed:36517592). The ribosome is a large ribonucleoprotein complex responsible for the synthesis of proteins in the cell (PubMed:36517592). {ECO:0000269|PubMed:36517592}.	5.0	RNA binding [GO:0003723]; structural constituent of ribosome [GO:0003735]	blastocyst development [GO:0001824]; bone development [GO:0060348]; cytoplasmic translation [GO:0002181]; translation at postsynapse [GO:0140242]; translation at presynapse [GO:0140236]
[351]		P19253	13	16	44.3	1	1	6.96318	5.4	23464.4	MOUSE	60S ribosomal protein L13a					P19253	P19253	reviewed	RL13A_MOUSE	Large ribosomal subunit protein uL13 (60S ribosomal protein L13a) (Transplantation antigen P198) (Tum-P198 antigen)	Rpl13a P198 Tstap198-7	Mus musculus (Mouse)	203	FUNCTION: Associated with ribosomes but is not required for canonical ribosome function and has extra-ribosomal functions (PubMed:36517592). Component of the GAIT (gamma interferon-activated inhibitor of translation) complex which mediates interferon-gamma-induced transcript-selective translation inhibition in inflammation processes (PubMed:23071094). Upon interferon-gamma activation and subseque…	5.0	mRNA binding [GO:0003729]; structural constituent of ribosome [GO:0003735]	cellular response to type II interferon [GO:0071346]; cytoplasmic translation [GO:0002181]; homeostatic process [GO:0042592]; lung morphogenesis [GO:0060425]; macrophage chemotaxis [GO:0048246]; negative regulation of formation of translation preinitiation complex [GO:1901194]; negative regulation of translation [GO:0017148]; response to lipopolysaccharide [GO:0032496]; translation at postsynapse…
[332]		Q9CR57	9	12	35	3	6	0.870398	15.7	23564.3	MOUSE	60S ribosomal protein L14					Q9CR57	Q9CR57	reviewed	RL14_MOUSE	Large ribosomal subunit protein eL14 (60S ribosomal protein L14)	Rpl14	Mus musculus (Mouse)	217	FUNCTION: Component of the large ribosomal subunit (PubMed:36517592). The ribosome is a large ribonucleoprotein complex responsible for the synthesis of proteins in the cell (PubMed:36517592). {ECO:0000269|PubMed:36517592}.	5.0	RNA binding [GO:0003723]; structural constituent of ribosome [GO:0003735]	cytoplasmic translation [GO:0002181]; ribosomal large subunit biogenesis [GO:0042273]; rRNA processing [GO:0006364]; translation at postsynapse [GO:0140242]; translation at presynapse [GO:0140236]
[396]		Q9CZM2	10	17	44.1					24146.3	MOUSE	60S ribosomal protein L15					Q9CZM2	Q9CZM2	reviewed	RL15_MOUSE	Large ribosomal subunit protein eL15 (60S ribosomal protein L15)	Rpl15	Mus musculus (Mouse)	204	FUNCTION: Component of the large ribosomal subunit (PubMed:36517592). The ribosome is a large ribonucleoprotein complex responsible for the synthesis of proteins in the cell (PubMed:36517592). {ECO:0000269|PubMed:36517592}.	5.0	RNA binding [GO:0003723]; structural constituent of ribosome [GO:0003735]	cytoplasmic translation [GO:0002181]; response to ethanol [GO:0045471]; translation at postsynapse [GO:0140242]; translation at presynapse [GO:0140236]
[246]		Q9CPR4	10	16	48.9					21423.3	MOUSE	60S ribosomal protein L17					Q9CPR4	Q9CPR4	reviewed	RL17_MOUSE	Large ribosomal subunit protein uL22 (60S ribosomal protein L17)	Rpl17	Mus musculus (Mouse)	184	FUNCTION: Component of the large ribosomal subunit (PubMed:36517592). The ribosome is a large ribonucleoprotein complex responsible for the synthesis of proteins in the cell (PubMed:36517592). {ECO:0000269|PubMed:36517592}.	5.0	large ribosomal subunit rRNA binding [GO:0070180]; structural constituent of ribosome [GO:0003735]	cytoplasmic translation [GO:0002181]; positive regulation of G1/S transition of mitotic cell cycle [GO:1900087]; translation at postsynapse [GO:0140242]; translation at presynapse [GO:0140236]
[450]		P35980	6	11	36.7	2	3	1.59573	12.2	21644.7	MOUSE	60S ribosomal protein L18					P35980	P35980	reviewed	RL18_MOUSE	Large ribosomal subunit protein eL18 (60S ribosomal protein L18)	Rpl18	Mus musculus (Mouse)	188	FUNCTION: Component of the large ribosomal subunit (PubMed:36517592). The ribosome is a large ribonucleoprotein complex responsible for the synthesis of proteins in the cell (PubMed:36517592). {ECO:0000269|PubMed:36517592}.	5.0	RNA binding [GO:0003723]; structural constituent of ribosome [GO:0003735]	cytoplasmic translation [GO:0002181]
[337]		P62717	9	13	48.3					20732.5	MOUSE	60S ribosomal protein L18a					P62717	P62717	reviewed	RL18A_MOUSE	Large ribosomal subunit protein eL20 (60S ribosomal protein L18a)	Rpl18a	Mus musculus (Mouse)	176	FUNCTION: Component of the large ribosomal subunit (PubMed:36517592). The ribosome is a large ribonucleoprotein complex responsible for the synthesis of proteins in the cell (PubMed:36517592). {ECO:0000269|PubMed:36517592}.	4.0	structural constituent of ribosome [GO:0003735]	cytoplasmic translation [GO:0002181]
[301]		P84099	8	9	31.1	1	3	1.3056	4.6	23466.2	MOUSE	60S ribosomal protein L19					P84099	P84099	reviewed	RL19_MOUSE	Large ribosomal subunit protein eL19 (60S ribosomal protein L19)	Rpl19	Mus musculus (Mouse)	196	FUNCTION: Component of the large ribosomal subunit (PubMed:36517592). The ribosome is a large ribonucleoprotein complex responsible for the synthesis of proteins in the cell (PubMed:36517592). {ECO:0000269|PubMed:36517592}.	5.0	5.8S rRNA binding [GO:1990932]; large ribosomal subunit rRNA binding [GO:0070180]; RNA binding [GO:0003723]; structural constituent of ribosome [GO:0003735]	cytoplasmic translation [GO:0002181]; translation [GO:0006412]
[522]		O09167	5	9	38.1					18562	MOUSE	60S ribosomal protein L21					O09167	O09167	reviewed	RL21_MOUSE	Large ribosomal subunit protein eL21 (60S ribosomal protein L21)	Rpl21	Mus musculus (Mouse)	160	FUNCTION: Component of the large ribosomal subunit (PubMed:36517592). The ribosome is a large ribonucleoprotein complex responsible for the synthesis of proteins in the cell (PubMed:36517592). {ECO:0000269|PubMed:36517592}.	4.0	structural constituent of ribosome [GO:0003735]	cytoplasmic translation [GO:0002181]
[648]		P67984	5	5	50.8	3	5	0.435199	19.5	14759.1	MOUSE	60S ribosomal protein L22					P67984	P67984	reviewed	RL22_MOUSE	Large ribosomal subunit protein eL22 (60S ribosomal protein L22) (Heparin-binding protein HBp15)	Rpl22	Mus musculus (Mouse)	128	FUNCTION: Component of the large ribosomal subunit (PubMed:36517592). The ribosome is a large ribonucleoprotein complex responsible for the synthesis of proteins in the cell (PubMed:36517592). {ECO:0000269|PubMed:36517592}.	5.0	heparin binding [GO:0008201]; identical protein binding [GO:0042802]; RNA binding [GO:0003723]; structural constituent of ribosome [GO:0003735]	alpha-beta T cell differentiation [GO:0046632]; cytoplasmic translation [GO:0002181]; translation at postsynapse [GO:0140242]; translation at presynapse [GO:0140236]
[648-1]	1	Q9D7S7	2	2	16.4					14467.5	MOUSE	60S ribosomal protein L22-like 1					Q9D7S7	Q9D7S7	reviewed	RL22L_MOUSE	Large ribosomal subunit protein eL22-like 1 (60S ribosomal protein L22-like 1)	Rpl22l1	Mus musculus (Mouse)	122		3.0	RNA binding [GO:0003723]; structural constituent of ribosome [GO:0003735]	cytoplasmic translation [GO:0002181]
[336]		P62830	7	8	52.1	6	11	0.316508	37.9	14865.6	MOUSE	60S ribosomal protein L23					P62830	P62830	reviewed	RL23_MOUSE	Large ribosomal subunit protein uL14 (60S ribosomal protein L23)	Rpl23	Mus musculus (Mouse)	140	FUNCTION: Component of the large ribosomal subunit (PubMed:36517592). The ribosome is a large ribonucleoprotein complex responsible for the synthesis of proteins in the cell (PubMed:36517592). {ECO:0000269|PubMed:36517592}.	5.0	large ribosomal subunit rRNA binding [GO:0070180]; structural constituent of ribosome [GO:0003735]; transcription coactivator binding [GO:0001223]; ubiquitin ligase inhibitor activity [GO:1990948]; ubiquitin protein ligase binding [GO:0031625]	cellular response to actinomycin D [GO:0072717]; cytoplasmic translation [GO:0002181]; G1 to G0 transition [GO:0070314]; negative regulation of transcription by RNA polymerase II [GO:0000122]; negative regulation of ubiquitin protein ligase activity [GO:1904667]; negative regulation of ubiquitin-dependent protein catabolic process [GO:2000059]; positive regulation of cell population proliferation…
[489]		P62751	6	6	37.2	7	12	0.217599	41.7	17695.2	MOUSE	60S ribosomal protein L23a					P62751	P62751	reviewed	RL23A_MOUSE	Large ribosomal subunit protein uL23 (60S ribosomal protein L23a)	Rpl23a	Mus musculus (Mouse)	156	FUNCTION: Component of the large ribosomal subunit (PubMed:36517592). The ribosome is a large ribonucleoprotein complex responsible for the synthesis of proteins in the cell (PubMed:36517592). Binds a specific region on the 26S rRNA (By similarity). May promote p53/TP53 degradation possibly through the stimulation of MDM2-mediated TP53 polyubiquitination (By similarity). {ECO:0000250|UniProtKB:P6…	5.0	large ribosomal subunit rRNA binding [GO:0070180]; structural constituent of ribosome [GO:0003735]; TORC2 complex binding [GO:1904841]	cytoplasmic translation [GO:0002181]; ribosomal large subunit assembly [GO:0000027]; translation at postsynapse [GO:0140242]; translation at presynapse [GO:0140236]
[585]		Q8BP67	4	4	26.1	4	9	0.193422	22.3	17779.1	MOUSE	60S ribosomal protein L24					Q8BP67	Q8BP67	reviewed	RL24_MOUSE	Large ribosomal subunit protein eL24 (60S ribosomal protein L24)	Rpl24	Mus musculus (Mouse)	157	FUNCTION: Component of the large ribosomal subunit (PubMed:36517592). The ribosome is a large ribonucleoprotein complex responsible for the synthesis of proteins in the cell (PubMed:36517592). {ECO:0000269|PubMed:36517592}.	5.0	mRNA binding [GO:0003729]; structural constituent of ribosome [GO:0003735]	cytoplasmic translation [GO:0002181]; exit from mitosis [GO:0010458]; optic nerve development [GO:0021554]; retina development in camera-type eye [GO:0060041]; retinal ganglion cell axon guidance [GO:0031290]; ribosomal large subunit assembly [GO:0000027]; translation [GO:0006412]; translation at postsynapse [GO:0140242]; translation at presynapse [GO:0140236]
[503]		P61255	10	13	44.8	7	9	0.628621	32.4	17258.4	MOUSE	60S ribosomal protein L26					P61255	P61255	reviewed	RL26_MOUSE	Large ribosomal subunit protein uL24 (60S ribosomal protein L26) (Silica-induced gene 20 protein) (SIG-20)	Rpl26	Mus musculus (Mouse)	145	FUNCTION: Component of the large ribosomal subunit (PubMed:26100019, PubMed:36517592). The ribosome is a large ribonucleoprotein complex responsible for the synthesis of proteins in the cell (PubMed:26100019, PubMed:36517592). {ECO:0000269|PubMed:26100019, ECO:0000269|PubMed:36517592}.	5.0	mRNA 5'-UTR binding [GO:0048027]; RNA binding [GO:0003723]; structural constituent of ribosome [GO:0003735]	cellular response to gamma radiation [GO:0071480]; cellular response to ionizing radiation [GO:0071479]; cellular response to UV [GO:0034644]; cytoplasmic translation [GO:0002181]; DNA damage response, signal transduction by p53 class mediator resulting in cell cycle arrest [GO:0006977]; positive regulation of DNA damage response, signal transduction by p53 class mediator resulting in transcripti…
[687]		P61358	7	11	49.3	5	6	0.797865	33.1	15797.9	MOUSE	60S ribosomal protein L27					P61358	P61358	reviewed	RL27_MOUSE	Large ribosomal subunit protein eL27 (60S ribosomal protein L27)	Rpl27	Mus musculus (Mouse)	136	FUNCTION: Component of the large ribosomal subunit (PubMed:36517592). Required for proper rRNA processing and maturation of 28S and 5.8S rRNAs (By similarity). {ECO:0000250|UniProtKB:A1XQU5, ECO:0000269|PubMed:36517592}.	5.0	structural constituent of ribosome [GO:0003735]	cytoplasmic translation [GO:0002181]; rRNA processing [GO:0006364]; translation at postsynapse [GO:0140242]; translation at presynapse [GO:0140236]
[635]		P14115	4	5	24.3	1	2	1.088	7.4	16605.6	MOUSE	60S ribosomal protein L27a					P14115	P14115	reviewed	RL27A_MOUSE	Large ribosomal subunit protein uL15 (60S ribosomal protein L27a) (L29)	Rpl27a	Mus musculus (Mouse)	148	FUNCTION: Component of the large ribosomal subunit (PubMed:36517592). The ribosome is a large ribonucleoprotein complex responsible for the synthesis of proteins in the cell (PubMed:36517592). {ECO:0000269|PubMed:36517592}.	5.0	structural constituent of ribosome [GO:0003735]	cytoplasmic translation [GO:0002181]; translation [GO:0006412]; translation at postsynapse [GO:0140242]; translation at presynapse [GO:0140236]
[539]		P41105	8	8	39.4	8	9	0.386843	50.4	15733.6	MOUSE	60S ribosomal protein L28					P41105	P41105	reviewed	RL28_MOUSE	Large ribosomal subunit protein eL28 (60S ribosomal protein L28)	Rpl28	Mus musculus (Mouse)	137	FUNCTION: Component of the large ribosomal subunit (PubMed:36517592). The ribosome is a large ribonucleoprotein complex responsible for the synthesis of proteins in the cell (PubMed:36517592). {ECO:0000269|PubMed:36517592}.	5.0	structural constituent of ribosome [GO:0003735]	cytoplasmic translation [GO:0002181]; translation at postsynapse [GO:0140242]; translation at presynapse [GO:0140236]
[1054]		P47915	2	2	12.5	2	5	0.17408	12.5	17587.1	MOUSE	60S ribosomal protein L29					P47915	P47915	reviewed	RL29_MOUSE	Large ribosomal subunit protein eL29 (60S ribosomal protein L29)	Rpl29 Rpl43	Mus musculus (Mouse)	160	FUNCTION: Component of the large ribosomal subunit (PubMed:36517592). The ribosome is a large ribonucleoprotein complex responsible for the synthesis of proteins in the cell (PubMed:36517592). {ECO:0000269|PubMed:36517592}.	5.0	heparin binding [GO:0008201]; structural constituent of ribosome [GO:0003735]	cell-substrate adhesion [GO:0031589]; cytoplasmic translation [GO:0002181]; fibroblast proliferation [GO:0048144]; multicellular organism growth [GO:0035264]; translation [GO:0006412]; translation at postsynapse [GO:0140242]; translation at presynapse [GO:0140236]
[69]		P27659	28	79	57.6	6	9	3.82008	14.9	46110.3	MOUSE	60S ribosomal protein L3					P27659	P27659	reviewed	RL3_MOUSE	Large ribosomal subunit protein uL3 (60S ribosomal protein L3) (J1 protein)	Rpl3	Mus musculus (Mouse)	403	FUNCTION: Component of the large ribosomal subunit (PubMed:36517592). The ribosome is a large ribonucleoprotein complex responsible for the synthesis of proteins in the cell (PubMed:36517592). {ECO:0000269|PubMed:36517592}.	5.0	5S rRNA binding [GO:0008097]; RNA binding [GO:0003723]; structural constituent of ribosome [GO:0003735]	cellular response to interleukin-4 [GO:0071353]; cytoplasmic translation [GO:0002181]; translation [GO:0006412]
[593]		P62889	4	5	40	7	8	0.271999	47	12784.2	MOUSE	60S ribosomal protein L30					P62889	P62889	reviewed	RL30_MOUSE	Large ribosomal subunit protein eL30 (60S ribosomal protein L30)	Rpl30	Mus musculus (Mouse)	115	FUNCTION: Component of the large ribosomal subunit (PubMed:36517592). The ribosome is a large ribonucleoprotein complex responsible for the synthesis of proteins in the cell (PubMed:36517592). {ECO:0000269|PubMed:36517592}.	5.0	RNA binding [GO:0003723]; selenocysteine insertion sequence binding [GO:0035368]; structural constituent of ribosome [GO:0003735]	antimicrobial humoral immune response mediated by antimicrobial peptide [GO:0061844]; cytoplasmic translation [GO:0002181]; defense response to Gram-negative bacterium [GO:0050829]; killing of cells of another organism [GO:0031640]
[586]		P62900	6	6	44.8	3	7	0.373028	24	14463	MOUSE	60S ribosomal protein L31					P62900	P62900	reviewed	RL31_MOUSE	Large ribosomal subunit protein eL31 (60S ribosomal protein L31)	Rpl31	Mus musculus (Mouse)	125	FUNCTION: Component of the large ribosomal subunit (PubMed:36517592). The ribosome is a large ribonucleoprotein complex responsible for the synthesis of proteins in the cell (PubMed:36517592). {ECO:0000269|PubMed:36517592}.	4.0	structural constituent of ribosome [GO:0003735]	cytoplasmic translation [GO:0002181]
[613]		P62911	4	6	30.4					15859.9	MOUSE	60S ribosomal protein L32					P62911	P62911	reviewed	RL32_MOUSE	Large ribosomal subunit protein eL32 (60S ribosomal protein L32)	Rpl32	Mus musculus (Mouse)	135	FUNCTION: Component of the large ribosomal subunit (PubMed:36517592). The ribosome is a large ribonucleoprotein complex responsible for the synthesis of proteins in the cell (PubMed:36517592). {ECO:0000269|PubMed:36517592}.	5.0	structural constituent of ribosome [GO:0003735]	cytoplasmic translation [GO:0002181]; translation [GO:0006412]; translation at postsynapse [GO:0140242]; translation at presynapse [GO:0140236]
[926]		Q9D1R9	3	3	20.5	3	10	0.13056	22.2	13293	MOUSE	60S ribosomal protein L34					Q9D1R9	Q9D1R9	reviewed	RL34_MOUSE	Large ribosomal subunit protein eL34 (60S ribosomal protein L34)	Rpl34	Mus musculus (Mouse)	117	FUNCTION: Component of the large ribosomal subunit (PubMed:36517592). The ribosome is a large ribonucleoprotein complex responsible for the synthesis of proteins in the cell (PubMed:36517592). {ECO:0000269|PubMed:36517592}.	5.0	structural constituent of ribosome [GO:0003735]	cytoplasmic translation [GO:0002181]; translation at postsynapse [GO:0140242]; translation at presynapse [GO:0140236]
[637]		Q6ZWV7	4	5	26	1	3	0.725331	8.1	14552.7	MOUSE	60S ribosomal protein L35					Q6ZWV7	Q6ZWV7	reviewed	RL35_MOUSE	Large ribosomal subunit protein uL29 (60S ribosomal protein L35)	Rpl35	Mus musculus (Mouse)	123	FUNCTION: Component of the large ribosomal subunit (PubMed:36517592). The ribosome is a large ribonucleoprotein complex responsible for the synthesis of proteins in the cell (PubMed:36517592). {ECO:0000269|PubMed:36517592}.	5.0	mRNA binding [GO:0003729]; ribonucleoprotein complex binding [GO:0043021]; structural constituent of ribosome [GO:0003735]	cytoplasmic translation [GO:0002181]; maturation of LSU-rRNA from tricistronic rRNA transcript (SSU-rRNA, 5.8S rRNA, LSU-rRNA) [GO:0000463]; translation at postsynapse [GO:0140242]; translation at presynapse [GO:0140236]
[1367]		O55142	3	3	20					12553.8	MOUSE	60S ribosomal protein L35a					O55142	O55142	reviewed	RL35A_MOUSE	Large ribosomal subunit protein eL33 (60S ribosomal protein L35a)	Rpl35a	Mus musculus (Mouse)	110	FUNCTION: Component of the large ribosomal subunit (PubMed:36517592). The ribosome is a large ribonucleoprotein complex responsible for the synthesis of proteins in the cell (PubMed:36517592). Required for the proliferation and viability of hematopoietic cells (By similarity). {ECO:0000250|UniProtKB:P18077, ECO:0000269|PubMed:36517592}.	5.0	structural constituent of ribosome [GO:0003735]	cytoplasmic translation [GO:0002181]; ribosomal large subunit biogenesis [GO:0042273]; rRNA processing [GO:0006364]; translation at postsynapse [GO:0140242]; translation at presynapse [GO:0140236]
[1107]		P47964	2	2	12.4	2	5	0.17408	8.6	12215.6	MOUSE	60S ribosomal protein L36					P47964	P47964	reviewed	RL36_MOUSE	Large ribosomal subunit protein eL36 (60S ribosomal protein L36)	Rpl36	Mus musculus (Mouse)	105	FUNCTION: Component of the large ribosomal subunit (PubMed:36517592). The ribosome is a large ribonucleoprotein complex responsible for the synthesis of proteins in the cell (PubMed:36517592). {ECO:0000269|PubMed:36517592}.	5.0	structural constituent of ribosome [GO:0003735]	cytoplasmic translation [GO:0002181]; translation at postsynapse [GO:0140242]; translation at presynapse [GO:0140236]
[1016]		P61514	1	1	19.6					10275.4	MOUSE	60S ribosomal protein L37a					P61514	P61514	reviewed	RL37A_MOUSE	Large ribosomal subunit protein eL43 (60S ribosomal protein L37a)	Rpl37a	Mus musculus (Mouse)	92	FUNCTION: Component of the large ribosomal subunit (PubMed:36517592). The ribosome is a large ribonucleoprotein complex responsible for the synthesis of proteins in the cell (PubMed:36517592). {ECO:0000269|PubMed:36517592}.	5.0	metal ion binding [GO:0046872]; structural constituent of ribosome [GO:0003735]	cytoplasmic translation [GO:0002181]; translation at postsynapse [GO:0140242]; translation at presynapse [GO:0140236]
[1184]		Q9JJI8	1	2	17.1					8203.9	MOUSE	60S ribosomal protein L38					Q9JJI8	Q9JJI8	reviewed	RL38_MOUSE	Large ribosomal subunit protein eL38 (60S ribosomal protein L38)	Rpl38	Mus musculus (Mouse)	70	FUNCTION: Component of the large ribosomal subunit (PubMed:36517592). The ribosome is a large ribonucleoprotein complex responsible for the synthesis of proteins in the cell (PubMed:36517592). {ECO:0000269|PubMed:36517592}.	5.0	structural constituent of ribosome [GO:0003735]	90S preribosome assembly [GO:0034463]; axial mesoderm development [GO:0048318]; cytoplasmic translation [GO:0002181]; middle ear morphogenesis [GO:0042474]; ossification [GO:0001503]; regulation of translation [GO:0006417]; ribonucleoprotein complex assembly [GO:0022618]; sensory perception of sound [GO:0007605]; skeletal system development [GO:0001501]; translation at postsynapse [GO:0140242]; t…
[123]		Q9D8E6	19	29	44.4	4	6	2.10346	9.8	47154.1	MOUSE	60S ribosomal protein L4					Q9D8E6	Q9D8E6	reviewed	RL4_MOUSE	Large ribosomal subunit protein uL4 (60S ribosomal protein L4)	Rpl4	Mus musculus (Mouse)	419	FUNCTION: Component of the large ribosomal subunit (PubMed:36517592). The ribosome is a large ribonucleoprotein complex responsible for the synthesis of proteins in the cell (PubMed:36517592). {ECO:0000269|PubMed:36517592}.	5.0	5S rRNA binding [GO:0008097]; RNA binding [GO:0003723]; structural constituent of ribosome [GO:0003735]	cytoplasmic translation [GO:0002181]; positive regulation of axon extension [GO:0045773]; positive regulation of axonogenesis [GO:0050772]; translation at postsynapse [GO:0140242]; translation at presynapse [GO:0140236]
[121]		P47962	19	37	48.5	10	11	1.46385	32.3	34401	MOUSE	60S ribosomal protein L5					P47962	P47962	reviewed	RL5_MOUSE	Large ribosomal subunit protein uL18 (60S ribosomal protein L5)	Rpl5	Mus musculus (Mouse)	297	FUNCTION: Component of the ribosome, a large ribonucleoprotein complex responsible for the synthesis of proteins in the cell (PubMed:36517592). The small ribosomal subunit (SSU) binds messenger RNAs (mRNAs) and translates the encoded message by selecting cognate aminoacyl-transfer RNA (tRNA) molecules (By similarity). The large subunit (LSU) contains the ribosomal catalytic site termed the peptid…	5.0	5S rRNA binding [GO:0008097]; mRNA 3'-UTR binding [GO:0003730]; mRNA 5'-UTR binding [GO:0048027]; mRNA binding [GO:0003729]; structural constituent of ribosome [GO:0003735]; ubiquitin ligase inhibitor activity [GO:1990948]; ubiquitin protein ligase binding [GO:0031625]	cytoplasmic translation [GO:0002181]; negative regulation of protein neddylation [GO:2000435]; negative regulation of ubiquitin protein ligase activity [GO:1904667]; negative regulation of ubiquitin-dependent protein catabolic process [GO:2000059]; positive regulation of gene expression [GO:0010628]; positive regulation of isoleucine-tRNA ligase activity [GO:1905017]; positive regulation of methi…
[109]		P47911	23	53	59.1	5	13	1.77427	14.2	33509.9	MOUSE	60S ribosomal protein L6					P47911	P47911	reviewed	RL6_MOUSE	Large ribosomal subunit protein eL6 (60S ribosomal protein L6) (TAX-responsive enhancer element-binding protein 107) (TAXREB107)	Rpl6	Mus musculus (Mouse)	296	FUNCTION: Component of the large ribosomal subunit (PubMed:36517592). The ribosome is a large ribonucleoprotein complex responsible for the synthesis of proteins in the cell (PubMed:36517592). {ECO:0000269|PubMed:36517592}.	5.0	5.8S rRNA binding [GO:1990932]; mRNA binding [GO:0003729]; RNA binding [GO:0003723]; structural constituent of ribosome [GO:0003735]; tRNA binding [GO:0000049]	cytoplasmic translation [GO:0002181]; ribosomal large subunit assembly [GO:0000027]; translation at postsynapse [GO:0140242]; translation at presynapse [GO:0140236]
[174]		P14148	20	29	57.4	3	3	4.20692	11.5	31419.9	MOUSE	60S ribosomal protein L7					P14148	P14148	reviewed	RL7_MOUSE	Large ribosomal subunit protein uL30 (60S ribosomal protein L7)	Rpl7	Mus musculus (Mouse)	270	FUNCTION: Component of the large ribosomal subunit (PubMed:36517592). The ribosome is a large ribonucleoprotein complex responsible for the synthesis of proteins in the cell (PubMed:36517592). Binds to G-rich structures in 28S rRNA and in mRNAs (By similarity). Plays a regulatory role in the translation apparatus; inhibits cell-free translation of mRNAs (By similarity). {ECO:0000250|UniProtKB:P18…	5.0	5S rRNA binding [GO:0008097]; DNA binding [GO:0003677]; identical protein binding [GO:0042802]; mRNA binding [GO:0003729]; RNA binding [GO:0003723]; structural constituent of ribosome [GO:0003735]	cytoplasmic translation [GO:0002181]; maturation of LSU-rRNA from tricistronic rRNA transcript (SSU-rRNA, 5.8S rRNA, LSU-rRNA) [GO:0000463]; ribosomal large subunit biogenesis [GO:0042273]; rRNA processing [GO:0006364]; translation [GO:0006412]; translation at postsynapse [GO:0140242]; translation at presynapse [GO:0140236]
[205]		P12970	14	21	51.5	2	4	2.28479	7.1	29976.8	MOUSE	60S ribosomal protein L7a					P12970	P12970	reviewed	RL7A_MOUSE	Large ribosomal subunit protein eL8 (60S ribosomal protein L7a) (Surfeit locus protein 3)	Rpl7a Surf-3 Surf3	Mus musculus (Mouse)	266	FUNCTION: Component of the large ribosomal subunit (PubMed:36517592). The ribosome is a large ribonucleoprotein complex responsible for the synthesis of proteins in the cell (PubMed:36517592). {ECO:0000269|PubMed:36517592}.	5.0	structural constituent of ribosome [GO:0003735]	cytoplasmic translation [GO:0002181]; ribosome biogenesis [GO:0042254]; translation at postsynapse [GO:0140242]; translation at presynapse [GO:0140236]
[483]		P62918	7	13	20.2	4	7	0.808227	16.3	28024.9	MOUSE	60S ribosomal protein L8					P62918	P62918	reviewed	RL8_MOUSE	Large ribosomal subunit protein uL2 (60S ribosomal protein L8)	Rpl8	Mus musculus (Mouse)	257	FUNCTION: Component of the large ribosomal subunit (PubMed:36517592). The ribosome is a large ribonucleoprotein complex responsible for the synthesis of proteins in the cell (PubMed:36517592). {ECO:0000269|PubMed:36517592}.	5.0	5.8S rRNA binding [GO:1990932]; RNA binding [GO:0003723]; structural constituent of ribosome [GO:0003735]	cellular response to nerve growth factor stimulus [GO:1990090]; cytoplasmic translation [GO:0002181]; translation at postsynapse [GO:0140242]; translation at presynapse [GO:0140236]
[475]		P51410	7	10	40.1					21881.6	MOUSE	60S ribosomal protein L9					P51410	P51410	reviewed	RL9_MOUSE	Large ribosomal subunit protein uL6 (60S ribosomal protein L9)	Rpl9	Mus musculus (Mouse)	192	FUNCTION: Component of the large ribosomal subunit (PubMed:36517592). The ribosome is a large ribonucleoprotein complex responsible for the synthesis of proteins in the cell (PubMed:36517592). {ECO:0000269|PubMed:36517592}.	5.0	rRNA binding [GO:0019843]; structural constituent of ribosome [GO:0003735]	cytoplasmic translation [GO:0002181]; translation [GO:0006412]; translation at postsynapse [GO:0140242]; translation at presynapse [GO:0140236]
[37]		Q9WUA3	27	44	54.6	2	2	9.57438	4.1	85455.8	MOUSE	6-phosphofructokinase type C					Q9WUA3	Q9WUA3	reviewed	PFKAP_MOUSE	ATP-dependent 6-phosphofructokinase, platelet type (ATP-PFK) (PFK-P) (EC 2.7.1.11) (6-phosphofructokinase type C) (Phosphofructo-1-kinase isozyme C) (PFK-C) (Phosphohexokinase)	Pfkp Pfkc	Mus musculus (Mouse)	784	FUNCTION: Catalyzes the phosphorylation of D-fructose 6-phosphate to fructose 1,6-bisphosphate by ATP, the first committing step of glycolysis.	5.0	6-phosphofructokinase activity [GO:0003872]; AMP binding [GO:0016208]; ATP binding [GO:0005524]; fructose-6-phosphate binding [GO:0070095]; identical protein binding [GO:0042802]; metal ion binding [GO:0046872]; monosaccharide binding [GO:0048029]; protein-containing complex binding [GO:0044877]	canonical glycolysis [GO:0061621]; cellular response to leukemia inhibitory factor [GO:1990830]; fructose 1,6-bisphosphate metabolic process [GO:0030388]; fructose 6-phosphate metabolic process [GO:0006002]; glycolytic process [GO:0006096]; glycolytic process through fructose-6-phosphate [GO:0061615]
[40-1]	16	P20029	11	13	21.1	13	18	0.31431	22.7	72422.6	MOUSE	78 kDa glucose-regulated protein					P20029	P20029	reviewed	BIP_MOUSE	Endoplasmic reticulum chaperone BiP (EC 3.6.4.10) (78 kDa glucose-regulated protein) (GRP-78) (Binding-immunoglobulin protein) (BiP) (Heat shock protein 70 family protein 5) (HSP70 family protein 5) (Heat shock protein family A member 5) (Immunoglobulin heavy chain-binding protein)	Hspa5 Grp78	Mus musculus (Mouse)	655	FUNCTION: Endoplasmic reticulum chaperone that plays a key role in protein folding and quality control in the endoplasmic reticulum lumen (PubMed:12411443, PubMed:12475965). Involved in the correct folding of proteins and degradation of misfolded proteins via its interaction with DNAJC10/ERdj5, probably to facilitate the release of DNAJC10/ERdj5 from its substrate (PubMed:12411443). Acts as a key…	5.0	ATP binding [GO:0005524]; ATP hydrolysis activity [GO:0016887]; ATP-dependent protein folding chaperone [GO:0140662]; enzyme binding [GO:0019899]; heat shock protein binding [GO:0031072]; misfolded protein binding [GO:0051787]; protein domain specific binding [GO:0019904]; protein folding chaperone [GO:0044183]; ribosome binding [GO:0043022]; ubiquitin protein ligase binding [GO:0031625]; unfolde…	cellular response to antibiotic [GO:0071236]; cellular response to calcium ion [GO:0071277]; cellular response to cAMP [GO:0071320]; cellular response to gamma radiation [GO:0071480]; cellular response to glucose starvation [GO:0042149]; cellular response to interleukin-4 [GO:0071353]; cellular response to manganese ion [GO:0071287]; cellular response to nerve growth factor stimulus [GO:1990090];…
[832]		O88455	2	2	4					53919.2	MOUSE	7-dehydrocholesterol reductase					O88455	O88455	reviewed	DHCR7_MOUSE	7-dehydrocholesterol reductase (7-DHC reductase) (EC 1.3.1.21) (Sterol Delta(7)-reductase)	Dhcr7	Mus musculus (Mouse)	471	FUNCTION: 7-dehydrocholesterol reductase of the cholesterol biosynthetic pathway reducing the C7-C8 double bond of cholesta-5,7-dien-3beta-ol (7-dehydrocholesterol/7-DHC) and cholesta-5,7,24-trien-3beta-ol, two intermediates in that pathway. {ECO:0000269|PubMed:11230174}.	5.0	7-dehydrocholesterol reductase activity [GO:0047598]; NADP binding [GO:0050661]; sterol delta7 reductase activity [GO:0009918]	blood vessel development [GO:0001568]; brassinosteroid biosynthetic process [GO:0016132]; cholesterol biosynthetic process [GO:0006695]; lung development [GO:0030324]; lung epithelial cell differentiation [GO:0060487]; multicellular organism growth [GO:0035264]; post-embryonic development [GO:0009791]; regulation of cell population proliferation [GO:0042127]; regulation of cholesterol biosyntheti…
[4]		Q5SWU9	86	135	45.7					265259	MOUSE	Acetyl-CoA carboxylase 1					Q5SWU9	Q5SWU9	reviewed	ACACA_MOUSE	Acetyl-CoA carboxylase 1 (ACC1) (EC 6.4.1.2) (ACC-alpha) (Acetyl-CoA carboxylase 265)	Acaca Acac Gm738	Mus musculus (Mouse)	2345	FUNCTION: Cytosolic enzyme that catalyzes the carboxylation of acetyl-CoA to malonyl-CoA, the first and rate-limiting step of de novo fatty acid biosynthesis (PubMed:20952656). This is a 2 steps reaction starting with the ATP-dependent carboxylation of the biotin carried by the biotin carboxyl carrier (BCC) domain followed by the transfer of the carboxyl group from carboxylated biotin to acetyl-C…	5.0	acetyl-CoA carboxylase activity [GO:0003989]; ATP binding [GO:0005524]; biotin binding [GO:0009374]; identical protein binding [GO:0042802]; kinase binding [GO:0019900]; metal ion binding [GO:0046872]	acetyl-CoA metabolic process [GO:0006084]; cellular response to prostaglandin E stimulus [GO:0071380]; fatty acid biosynthetic process [GO:0006633]; lipid biosynthetic process [GO:0008610]; lipid homeostasis [GO:0055088]; lipid metabolic process [GO:0006629]; malonyl-CoA biosynthetic process [GO:2001295]; protein homotetramerization [GO:0051289]; protein metabolic process [GO:0019538]; response t…
[584]		Q9WV54	5	9	18.3					44670	MOUSE	Acid ceramidase					Q9WV54	Q9WV54	reviewed	ASAH1_MOUSE	Acid ceramidase (AC) (ACDase) (Acid CDase) (EC 3.5.1.23) (Acylsphingosine deacylase) (N-acylethanolamine hydrolase ASAH1) (EC 3.5.1.-) (N-acylsphingosine amidohydrolase) [Cleaved into: Acid ceramidase subunit alpha; Acid ceramidase subunit beta]	Asah1 Asah	Mus musculus (Mouse)	394	FUNCTION: Lysosomal ceramidase that hydrolyzes sphingolipid ceramides into sphingosine and free fatty acids at acidic pH (PubMed:9653654, PubMed:11829492). Ceramides, sphingosine, and its phosphorylated form sphingosine-1-phosphate are bioactive lipids that mediate cellular signaling pathways regulating several biological processes including cell proliferation, apoptosis and differentiation (PubM…	5.0	ceramidase activity [GO:0102121]; fatty acid amide hydrolase activity [GO:0017064]; hydrolase activity, acting on carbon-nitrogen (but not peptide) bonds, in linear amides [GO:0016811]; N-acylsphingosine amidohydrolase activity [GO:0017040]; nuclear receptor binding [GO:0016922]; transcription corepressor activity [GO:0003714]	cellular response to tumor necrosis factor [GO:0071356]; ceramide biosynthetic process [GO:0046513]; ceramide catabolic process [GO:0046514]; fatty acid metabolic process [GO:0006631]; keratinocyte differentiation [GO:0030216]; lung development [GO:0030324]; negative regulation of nucleic acid-templated transcription [GO:1903507]; regulation of programmed necrotic cell death [GO:0062098]; regulat…
[601]		Q9EST5	5	5	19.9					31079	MOUSE	Acidic leucine-rich nuclear phosphoprotein 32 family member B					Q9EST5	Q9EST5	reviewed	AN32B_MOUSE	Acidic leucine-rich nuclear phosphoprotein 32 family member B (Proliferation-related acidic leucine-rich protein PAL31)	Anp32b Pal31	Mus musculus (Mouse)	272	FUNCTION: Multifunctional protein that is involved in the regulation of many processes including cell proliferation, apoptosis, cell cycle progression or transcription (PubMed:21636789). Regulates the proliferation of neuronal stem cells, differentiation of leukemic cells and progression from G1 to S phase of the cell cycle. As negative regulator of caspase-3-dependent apoptosis, may act as an an…	5.0	histone binding [GO:0042393]; RNA polymerase binding [GO:0070063]	activation of cysteine-type endopeptidase activity involved in apoptotic process [GO:0006919]; G1/S transition of mitotic cell cycle [GO:0000082]; inner ear development [GO:0048839]; negative regulation of apoptotic process [GO:0043066]; negative regulation of cell differentiation [GO:0045596]; nucleosome assembly [GO:0006334]; positive regulation of cell population proliferation [GO:0008284]; po…
[26-2]	3	P68033	18	78	34.7	18	56	0.60617	31.8	42019.4	MOUSE	Actin, alpha cardiac muscle 1					P68033	P68033	reviewed	ACTC_MOUSE	Actin, alpha cardiac muscle 1 (EC 3.6.4.-) (Alpha-cardiac actin) [Cleaved into: Actin, alpha cardiac muscle 1, intermediate form]	Actc1 Actc	Mus musculus (Mouse)	377	FUNCTION: Actins are highly conserved proteins that are involved in various types of cell motility and are ubiquitously expressed in all eukaryotic cells.	5.0	ATP binding [GO:0005524]; hydrolase activity [GO:0016787]; microfilament motor activity [GO:0000146]; myosin binding [GO:0017022]	actin filament organization [GO:0007015]; actin filament-based movement [GO:0030048]; actin-mediated cell contraction [GO:0070252]; actin-myosin filament sliding [GO:0033275]; actomyosin structure organization [GO:0031032]; cardiac muscle contraction [GO:0060048]; cardiac muscle tissue morphogenesis [GO:0055008]; cardiac myofibril assembly [GO:0055003]; heart contraction [GO:0060047]; mesenchyme …
[26-3]	3	P68134	18	78	34.7	18	56	0.60617	31.8	42051.4	MOUSE	Actin, alpha skeletal muscle					P68134	P68134	reviewed	ACTS_MOUSE	Actin, alpha skeletal muscle (EC 3.6.4.-) (Alpha-actin-1) [Cleaved into: Actin, alpha skeletal muscle, intermediate form]	Acta1 Acta	Mus musculus (Mouse)	377	FUNCTION: Actins are highly conserved proteins that are involved in various types of cell motility and are ubiquitously expressed in all eukaryotic cells.	5.0	ATP binding [GO:0005524]; hydrolase activity [GO:0016787]	cellular response to organonitrogen compound [GO:0071417]; mesenchyme migration [GO:0090131]; positive regulation of gene expression [GO:0010628]; response to extracellular stimulus [GO:0009991]; response to lithium ion [GO:0010226]; response to mechanical stimulus [GO:0009612]; response to steroid hormone [GO:0048545]; skeletal muscle fiber adaptation [GO:0043503]; skeletal muscle fiber developm…
[26-4]	2	P62737	16	71	31.8	17	54	0.572206	28.9	42009.4	MOUSE	Actin, aortic smooth muscle					P62737	P62737	reviewed	ACTA_MOUSE	Actin, aortic smooth muscle (EC 3.6.4.-) (Alpha-actin-2) [Cleaved into: Actin, aortic smooth muscle, intermediate form]	Acta2 Actsa Actvs	Mus musculus (Mouse)	377	FUNCTION: Actins are highly conserved proteins that are involved in various types of cell motility and are ubiquitously expressed in all eukaryotic cells.	5.0	ATP binding [GO:0005524]; hydrolase activity [GO:0016787]; protein kinase binding [GO:0019901]	cellular response to transforming growth factor beta stimulus [GO:0071560]; glomerular mesangial cell development [GO:0072144]; juxtaglomerular apparatus development [GO:0072051]; mesenchyme migration [GO:0090131]; muscle contraction [GO:0006936]; positive regulation of ERK1 and ERK2 cascade [GO:0070374]; positive regulation of gene expression [GO:0010628]; positive regulation of hepatic stellate…
[26]		P60710	34	167	81.1	25	82	0.88632	53.9	41737.1	MOUSE	Actin, cytoplasmic 1					P60710	P60710	reviewed	ACTB_MOUSE	Actin, cytoplasmic 1 (Beta-actin) (EC 3.6.4.-) [Cleaved into: Actin, cytoplasmic 1, N-terminally processed]	Actb	Mus musculus (Mouse)	375	FUNCTION: Actin is a highly conserved protein that polymerizes to produce filaments that form cross-linked networks in the cytoplasm of cells (By similarity). Actin exists in both monomeric (G-actin) and polymeric (F-actin) forms, both forms playing key functions, such as cell motility and contraction (By similarity). In addition to their role in the cytoplasmic cytoskeleton, G- and F-actin also …	5.0	ATP binding [GO:0005524]; hydrolase activity [GO:0016787]; identical protein binding [GO:0042802]; kinesin binding [GO:0019894]; nitric-oxide synthase binding [GO:0050998]; protein kinase binding [GO:0019901]; structural constituent of postsynaptic actin cytoskeleton [GO:0098973]; Tat protein binding [GO:0030957]	adherens junction assembly [GO:0034333]; apical protein localization [GO:0045176]; axonogenesis [GO:0007409]; cell motility [GO:0048870]; cellular response to cytochalasin B [GO:0072749]; cellular response to electrical stimulus [GO:0071257]; chromatin remodeling [GO:0006338]; establishment or maintenance of cell polarity [GO:0007163]; histone acetylation [GO:0016573]; histone H2A acetylation [GO…
[26-5]	2	P63268	16	71	31.9	17	54	0.572206	29	41877.3	MOUSE	Actin, gamma-enteric smooth muscle					P63268	P63268	reviewed	ACTH_MOUSE	Actin, gamma-enteric smooth muscle (EC 3.6.4.-) (Alpha-actin-3) (Gamma-2-actin) (Smooth muscle gamma-actin) [Cleaved into: Actin, gamma-enteric smooth muscle, intermediate form]	Actg2 Acta3 Actsg	Mus musculus (Mouse)	376	FUNCTION: Actins are highly conserved proteins that are involved in various types of cell motility and are ubiquitously expressed in all eukaryotic cells.	5.0	ATP binding [GO:0005524]; hydrolase activity [GO:0016787]	mesenchyme migration [GO:0090131]; positive regulation of gene expression [GO:0010628]
[216]		Q9Z2N8	12	15	46.4					47448.4	MOUSE	Actin-like protein 6A					Q9Z2N8	Q9Z2N8	reviewed	ACL6A_MOUSE	Actin-like protein 6A (53 kDa BRG1-associated factor A) (Actin-related protein Baf53a) (BRG1-associated factor 53A) (BAF53A)	Actl6a Actl6 Baf53a	Mus musculus (Mouse)	429	FUNCTION: Involved in transcriptional activation and repression of select genes by chromatin remodeling (alteration of DNA-nucleosome topology). Component of SWI/SNF chromatin remodeling complexes that carry out key enzymatic activities, changing chromatin structure by altering DNA-histone contacts within a nucleosome in an ATP-dependent manner. Required for maximal ATPase activity of SMARCA4/BRG…	5.0	chromatin binding [GO:0003682]	blastocyst formation [GO:0001825]; chromatin remodeling [GO:0006338]; DNA recombination [GO:0006310]; DNA repair [GO:0006281]; histone acetylation [GO:0016573]; histone H2A acetylation [GO:0043968]; histone H4 acetylation [GO:0043967]; negative regulation of cell differentiation [GO:0045596]; nervous system development [GO:0007399]; neural retina development [GO:0003407]; positive regulation of c…
[1163]		Q9QZB7	1	1	4.3					46208.3	MOUSE	Actin-related protein 10					Q9QZB7	Q9QZB7	reviewed	ARP10_MOUSE	Actin-related protein 10 (Actin-related protein 11)	Actr10 Act11 Actr11 Arp10 Arp11	Mus musculus (Mouse)	417	FUNCTION: Part of the dynactin complex that activates the molecular motor dynein for ultra-processive transport along microtubules. {ECO:0000250|UniProtKB:I3LHK5}.	3.0		microtubule-based movement [GO:0007018]; retrograde axonal transport of mitochondrion [GO:0098958]
[245]		P61161	12	13	35.8					44761.2	MOUSE	Actin-related protein 2					P61161	P61161	reviewed	ARP2_MOUSE	Actin-related protein 2 (Actin-like protein 2)	Actr2 Arp2	Mus musculus (Mouse)	394	FUNCTION: ATP-binding component of the Arp2/3 complex, a multiprotein complex that mediates actin polymerization upon stimulation by nucleation-promoting factor (NPF). The Arp2/3 complex mediates the formation of branched actin networks in the cytoplasm, providing the force for cell motility. Seems to contact the pointed end of the daughter actin filament. In podocytes, required for the formation…	5.0	actin filament binding [GO:0051015]; ATP binding [GO:0005524]; cytoskeletal protein binding [GO:0008092]; structural constituent of cytoskeleton [GO:0005200]	actin cytoskeleton organization [GO:0030036]; Arp2/3 complex-mediated actin nucleation [GO:0034314]; associative learning [GO:0008306]; asymmetric cell division [GO:0008356]; cellular response to trichostatin A [GO:0035984]; cellular response to type II interferon [GO:0071346]; cilium assembly [GO:0060271]; cytosolic transport [GO:0016482]; establishment or maintenance of cell polarity [GO:000716…
[989]		P59999				3	3	0	17.9	19667.2	MOUSE	Actin-related protein 2/3 complex subunit 4					P59999	P59999	reviewed	ARPC4_MOUSE	Actin-related protein 2/3 complex subunit 4 (Arp2/3 complex 20 kDa subunit) (p20-ARC)	Arpc4 Arc20	Mus musculus (Mouse)	168	FUNCTION: Actin-binding component of the Arp2/3 complex, a multiprotein complex that mediates actin polymerization upon stimulation by nucleation-promoting factor (NPF). The Arp2/3 complex mediates the formation of branched actin networks in the cytoplasm, providing the force for cell motility. In addition to its role in the cytoplasmic cytoskeleton, the Arp2/3 complex also promotes actin polymer…	4.0	actin filament binding [GO:0051015]; enzyme binding [GO:0019899]; protein-macromolecule adaptor activity [GO:0030674]; structural constituent of cytoskeleton [GO:0005200]	actin filament polymerization [GO:0030041]; Arp2/3 complex-mediated actin nucleation [GO:0034314]
[1078]		Q641P0	1	2	2.6					47580.1	MOUSE	Actin-related protein 3B					Q641P0	Q641P0	reviewed	ARP3B_MOUSE	Actin-related protein 3B (ARP3-beta) (Actin-like protein 3B)	Actr3b	Mus musculus (Mouse)	418	FUNCTION: Plays a role in the organization of the actin cytoskeleton. May function as ATP-binding component of the Arp2/3 complex which is involved in regulation of actin polymerization and together with an activating nucleation-promoting factor (NPF) mediates the formation of branched actin networks. May decrease the metastatic potential of tumors (By similarity). {ECO:0000250}.	3.0	actin binding [GO:0003779]; ATP binding [GO:0005524]
[251]		P11031				14	19	0	46.5	14427.6	MOUSE	Activated RNA polymerase II transcriptional coactivator p15					P11031	P11031	reviewed	TCP4_MOUSE	Activated RNA polymerase II transcriptional coactivator p15 (Positive cofactor 4) (PC4) (SUB1 homolog) (Single-stranded DNA-binding protein p9) (p14)	Sub1 Pc4 Rpo2tc1	Mus musculus (Mouse)	127	FUNCTION: General coactivator that functions cooperatively with TAFs and mediates functional interactions between upstream activators and the general transcriptional machinery. May be involved in stabilizing the multiprotein transcription complex. Binds single-stranded DNA. Also binds, in vitro, non-specifically to double-stranded DNA (ds DNA).	5.0	DNA helicase activity [GO:0003678]; DNA-binding transcription factor binding [GO:0140297]; identical protein binding [GO:0042802]; RNA polymerase II cis-regulatory region sequence-specific DNA binding [GO:0000978]; single-stranded DNA binding [GO:0003697]; transcription coactivator activity [GO:0003713]	negative regulation of DNA duplex unwinding [GO:1905463]; negative regulation of DNA metabolic process [GO:0051053]; positive regulation of protein binding [GO:0032092]; positive regulation of transcription initiation by RNA polymerase II [GO:0060261]; protein homooligomerization [GO:0051260]; regulation of transcription by RNA polymerase II [GO:0006357]; RNA polymerase II promoter clearance [GO:…
[258]		Q8BK64	11	17	40.8					38117.4	MOUSE	Activator of 90 kDa heat shock protein ATPase homolog 1					Q8BK64	Q8BK64	reviewed	AHSA1_MOUSE	Activator of 90 kDa heat shock protein ATPase homolog 1 (AHA1)	Ahsa1	Mus musculus (Mouse)	338	FUNCTION: Acts as a co-chaperone of HSP90AA1 (PubMed:29127155). Activates the ATPase activity of HSP90AA1 leading to increase in its chaperone activity (PubMed:29127155). Competes with the inhibitory co-chaperone FNIP1 for binding to HSP90AA1, thereby providing a reciprocal regulatory mechanism for chaperoning of client proteins (By similarity). Competes with the inhibitory co-chaperone TSC1 for …	4.0	ATPase activator activity [GO:0001671]; Hsp90 protein binding [GO:0051879]; protein-folding chaperone binding [GO:0051087]	positive regulation of ATP-dependent activity [GO:0032781]; protein folding [GO:0006457]
[847]		Q8C6B9				2	2	0	22.4	15977.7	MOUSE	Active regulator of SIRT1					Q8C6B9	Q8C6B9	reviewed	AROS_MOUSE	Active regulator of SIRT1 (40S ribosomal protein S19-binding protein 1) (RPS19-binding protein 1) (S19BP)	Rps19bp1 Aros	Mus musculus (Mouse)	143	FUNCTION: Part of the small subunit (SSU) processome, first precursor of the small eukaryotic ribosomal subunit. During the assembly of the SSU processome in the nucleolus, many ribosome biogenesis factors, an RNA chaperone and ribosomal proteins associate with the nascent pre-rRNA and work in concert to generate RNA folding, modifications, rearrangements and cleavage as well as targeted degradat…	4.0	enzyme binding [GO:0019899]	ribosomal small subunit biogenesis [GO:0042274]
[157]		Q8R146	17	19	39.6					81581.6	MOUSE	Acylamino-acid-releasing enzyme					Q8R146	Q8R146	reviewed	ACPH_MOUSE	Acylamino-acid-releasing enzyme (AARE) (EC 3.4.19.1) (Acyl-peptide hydrolase) (APH) (Acylaminoacyl-peptidase)	Apeh	Mus musculus (Mouse)	732	FUNCTION: This enzyme catalyzes the hydrolysis of the N-terminal peptide bond of an N-acetylated peptide to generate an N-acetylated amino acid and a peptide with a free N-terminus (By similarity). It preferentially cleaves off Ac-Ala, Ac-Met and Ac-Ser (By similarity). Also, involved in the degradation of oxidized and glycated proteins (By similarity). {ECO:0000250|UniProtKB:P13676, ECO:0000250|…	4.0	identical protein binding [GO:0042802]; omega peptidase activity [GO:0008242]; serine-type endopeptidase activity [GO:0004252]	amyloid-beta metabolic process [GO:0050435]; proteolysis [GO:0006508]
[1242]		Q80XL6	1	1	1.3					87367.2	MOUSE	Acyl-CoA dehydrogenase family member 11					Q80XL6	Q80XL6	reviewed	ACD11_MOUSE	Acyl-CoA dehydrogenase family member 11 (ACAD-11) (EC 1.3.8.-)	Acad11	Mus musculus (Mouse)	779	FUNCTION: Acyl-CoA dehydrogenase, that exhibits maximal activity towards saturated C22-CoA. Probably participates in beta-oxydation and energy production but could also play a role in the metabolism of specific fatty acids to control fatty acids composition of cellular lipids in brain. {ECO:0000250|UniProtKB:Q709F0}.	4.0	acyl-CoA dehydrogenase activity [GO:0003995]; flavin adenine dinucleotide binding [GO:0050660]; long-chain-acyl-CoA dehydrogenase activity [GO:0004466]; medium-chain-acyl-CoA dehydrogenase activity [GO:0070991]; very-long-chain-acyl-CoA dehydrogenase activity [GO:0017099]	fatty acid beta-oxidation using acyl-CoA dehydrogenase [GO:0033539]
[212]		Q8JZN5	13	15	31.4					68722.7	MOUSE	Acyl-CoA dehydrogenase family member 9, mitochondrial					Q8JZN5	Q8JZN5	reviewed	ACAD9_MOUSE	Complex I assembly factor ACAD9, mitochondrial (Acyl-CoA dehydrogenase family member 9) (ACAD-9) (EC 1.3.8.-)	Acad9	Mus musculus (Mouse)	625	FUNCTION: As part of the MCIA complex, primarily participates in the assembly of the mitochondrial complex I and therefore plays a role in oxidative phosphorylation. This moonlighting protein has also a dehydrogenase activity toward a broad range of substrates with greater specificity for long-chain unsaturated acyl-CoAs. However, in vivo, it does not seem to play a primary role in fatty acid oxi…	5.0	acyl-CoA dehydrogenase activity [GO:0003995]; flavin adenine dinucleotide binding [GO:0050660]; long-chain-acyl-CoA dehydrogenase activity [GO:0004466]; medium-chain-acyl-CoA dehydrogenase activity [GO:0070991]	fatty acid beta-oxidation [GO:0006635]; long-chain fatty acid metabolic process [GO:0001676]; medium-chain fatty acid metabolic process [GO:0051791]; mitochondrial respiratory chain complex I assembly [GO:0032981]
[1092]		Q9ESW4	1	1	5.9					46976.4	MOUSE	Acylglycerol kinase, mitochondrial					Q9ESW4	Q9ESW4	reviewed	AGK_MOUSE	Acylglycerol kinase, mitochondrial (EC 2.7.1.107) (EC 2.7.1.138) (EC 2.7.1.94) (Multiple substrate lipid kinase) (MuLK) (Multi-substrate lipid kinase)	Agk Mulk	Mus musculus (Mouse)	421	FUNCTION: Lipid kinase that can phosphorylate both monoacylglycerol and diacylglycerol to form lysophosphatidic acid (LPA) and phosphatidic acid (PA), respectively (PubMed:15252046). Phosphorylates ceramide but not sphingosine (PubMed:15252046). Phosphorylates 1,2-dioleoylglycerol more rapidly than 2,3-dioleoylglycerol (PubMed:18004883). Independently of its lipid kinase activity, acts as a compo…	5.0	acylglycerol kinase activity [GO:0047620]; ATP binding [GO:0005524]; ceramide kinase activity [GO:0001729]; diacylglycerol kinase activity [GO:0004143]; dihydroceramide kinase activity [GO:0102773]; lipid kinase activity [GO:0001727]	ceramide biosynthetic process [GO:0046513]; glycerolipid metabolic process [GO:0046486]; lipid phosphorylation [GO:0046834]; protein insertion into mitochondrial inner membrane [GO:0045039]
[655]		P97823	4	4	25.2					24687.9	MOUSE	Acyl-protein thioesterase 1					P97823	P97823	reviewed	LYPA1_MOUSE	Acyl-protein thioesterase 1 (APT-1) (EC 3.1.2.-) (Lysophospholipase 1) (Lysophospholipase I) (LPL-I) (LysoPLA I) (Palmitoyl-protein hydrolase) (EC 3.1.2.22)	Lypla1 Apt1 Pla1a	Mus musculus (Mouse)	230	FUNCTION: Acts as a acyl-protein thioesterase hydrolyzing fatty acids from S-acylated cysteine residues in proteins such as trimeric G alpha proteins or HRAS (By similarity). Has depalmitoylating activity toward KCNMA1 (By similarity). Could also depalmitoylate ADRB2 (By similarity). Acts as a lysophospholipase hydrolyzing various lysophospholipids including lysophosphatidylcholine (lyso-PC), lys…	5.0	carboxylic ester hydrolase activity [GO:0052689]; lipase activity [GO:0016298]; lysophospholipase activity [GO:0004622]; palmitoyl-(protein) hydrolase activity [GO:0008474]; phospholipase activity [GO:0004620]	fatty acid metabolic process [GO:0006631]; fatty acid transport [GO:0015908]; negative regulation of Golgi to plasma membrane protein transport [GO:0042997]; protein depalmitoylation [GO:0002084]
[474]		P08030	7	9	48.3					19724.1	MOUSE	Adenine phosphoribosyltransferase					P08030	P08030	reviewed	APT_MOUSE	Adenine phosphoribosyltransferase (APRT) (EC 2.4.2.7)	Aprt	Mus musculus (Mouse)	180	FUNCTION: Catalyzes a salvage reaction resulting in the formation of AMP, that is energically less costly than de novo synthesis. {ECO:0000250|UniProtKB:P07741}.	5.0	adenine binding [GO:0002055]; adenine phosphoribosyltransferase activity [GO:0003999]; AMP binding [GO:0016208]	adenine metabolic process [GO:0046083]; adenine salvage [GO:0006168]; AMP salvage [GO:0044209]; cellular response to insulin stimulus [GO:0032869]; GMP salvage [GO:0032263]; grooming behavior [GO:0007625]; IMP salvage [GO:0032264]; lactation [GO:0007595]; purine ribonucleoside salvage [GO:0006166]
[182]		P50247	17	23	50.9					47688.6	MOUSE	Adenosylhomocysteinase					P50247	P50247	reviewed	SAHH_MOUSE	Adenosylhomocysteinase (AdoHcyase) (EC 3.13.2.1) (CUBP) (Liver copper-binding protein) (S-adenosyl-L-homocysteine hydrolase)	Ahcy	Mus musculus (Mouse)	432	FUNCTION: Catalyzes the hydrolysis of S-adenosyl-L-homocysteine to form adenosine and homocysteine (PubMed:7657650). Binds copper ions (PubMed:7657650). {ECO:0000269|PubMed:7657650}.	5.0	adenosylhomocysteinase activity [GO:0004013]; adenyl nucleotide binding [GO:0030554]; copper ion binding [GO:0005507]; identical protein binding [GO:0042802]; NAD binding [GO:0051287]; protein self-association [GO:0043621]	chronic inflammatory response to antigenic stimulus [GO:0002439]; circadian sleep/wake cycle [GO:0042745]; one-carbon metabolic process [GO:0006730]; response to nutrient [GO:0007584]; S-adenosylhomocysteine catabolic process [GO:0019510]; S-adenosylmethionine cycle [GO:0033353]
[857]		P40124	1	1	4.6					51565.3	MOUSE	Adenylyl cyclase-associated protein 1					P40124	P40124	reviewed	CAP1_MOUSE	Adenylyl cyclase-associated protein 1 (CAP 1)	Cap1 Cap	Mus musculus (Mouse)	474	FUNCTION: Directly regulates filament dynamics and has been implicated in a number of complex developmental and morphological processes, including mRNA localization and the establishment of cell polarity. {ECO:0000250}.	5.0	actin binding [GO:0003779]; adenylate cyclase binding [GO:0008179]	actin cytoskeleton organization [GO:0030036]; actin filament organization [GO:0007015]; ameboidal-type cell migration [GO:0001667]; cAMP-mediated signaling [GO:0019933]; cell morphogenesis [GO:0000902]; receptor-mediated endocytosis [GO:0006898]
[1369]		A2BDX3	1	1	2					49375.5	MOUSE	Adenylyltransferase and sulfurtransferase MOCS3					A2BDX3	A2BDX3	reviewed	MOCS3_MOUSE	Adenylyltransferase and sulfurtransferase MOCS3 (Molybdenum cofactor synthesis protein 3) [Includes: Molybdopterin-synthase adenylyltransferase (EC 2.7.7.80) (Adenylyltransferase MOCS3) (Sulfur carrier protein MOCS2A adenylyltransferase); Molybdopterin-synthase sulfurtransferase (EC 2.8.1.11) (Sulfur carrier protein MOCS2A sulfurtransferase) (Sulfurtransferase MOCS3)]	Mocs3 Uba4	Mus musculus (Mouse)	460	FUNCTION: Plays a central role in 2-thiolation of mcm(5)S(2)U at tRNA wobble positions of cytosolic tRNA(Lys), tRNA(Glu) and tRNA(Gln). Also essential during biosynthesis of the molybdenum cofactor. Acts by mediating the C-terminal thiocarboxylation of sulfur carriers URM1 and MOCS2A. Its N-terminus first activates URM1 and MOCS2A as acyl-adenylates (-COAMP), then the persulfide sulfur on the cat…	5.0	ATP binding [GO:0005524]; metal ion binding [GO:0046872]; molybdopterin-synthase adenylyltransferase activity [GO:0061605]; molybdopterin-synthase sulfurtransferase activity [GO:0061604]; nucleotidyltransferase activity [GO:0016779]; sulfurtransferase activity [GO:0016783]; thiosulfate sulfurtransferase activity [GO:0004792]; URM1 activating enzyme activity [GO:0042292]	Mo-molybdopterin cofactor biosynthetic process [GO:0006777]; molybdopterin cofactor metabolic process [GO:0043545]; protein urmylation [GO:0032447]; tRNA thio-modification [GO:0034227]; tRNA wobble position uridine thiolation [GO:0002143]; tRNA wobble uridine modification [GO:0002098]
[126-1]	5	P48962	16	38	53.7					32904.6	MOUSE	ADP/ATP translocase 1					P48962	P48962	reviewed	ADT1_MOUSE	ADP/ATP translocase 1 (ADP,ATP carrier protein 1) (ADP,ATP carrier protein, heart/skeletal muscle isoform T1) (Adenine nucleotide translocator 1) (ANT 1) (Solute carrier family 25 member 4)	Slc25a4 Aac1 Anc1 Ant1	Mus musculus (Mouse)	298	FUNCTION: ADP:ATP antiporter that mediates import of ADP into the mitochondrial matrix for ATP synthesis, and export of ATP out to fuel the cell (PubMed:31618756, PubMed:31341297). Cycles between the cytoplasmic-open state (c-state) and the matrix-open state (m-state): operates by the alternating access mechanism with a single substrate-binding site intermittently exposed to either the cytosolic …	5.0	ATP:ADP antiporter activity [GO:0005471]; enzyme binding [GO:0019899]; oxidative phosphorylation uncoupler activity [GO:0017077]; proton transmembrane transporter activity [GO:0015078]	adaptive thermogenesis [GO:1990845]; ADP transport [GO:0015866]; apoptotic mitochondrial changes [GO:0008637]; mitochondrial ADP transmembrane transport [GO:0140021]; mitochondrial ATP transmembrane transport [GO:1990544]; negative regulation of cardiac muscle cell apoptotic process [GO:0010667]; negative regulation of mitochondrial membrane permeability involved in apoptotic process [GO:1902109]…
[126]		P51881	21	53	58.1	1	1	23.0655	4.4	32931.6	MOUSE	ADP/ATP translocase 2					P51881	P51881	reviewed	ADT2_MOUSE	ADP/ATP translocase 2 (ADP,ATP carrier protein 2) (Adenine nucleotide translocator 2) (ANT 2) (Solute carrier family 25 member 5) [Cleaved into: ADP/ATP translocase 2, N-terminally processed]	Slc25a5 Aac2 Ant2	Mus musculus (Mouse)	298	FUNCTION: ADP:ATP antiporter that mediates import of ADP into the mitochondrial matrix for ATP synthesis, and export of ATP out to fuel the cell (PubMed:31341297). Cycles between the cytoplasmic-open state (c-state) and the matrix-open state (m-state): operates by the alternating access mechanism with a single substrate-binding site intermittently exposed to either the cytosolic (c-state) or matr…	5.0	adenine nucleotide transmembrane transporter activity [GO:0000295]; ATP:ADP antiporter activity [GO:0005471]; oxidative phosphorylation uncoupler activity [GO:0017077]; proton transmembrane transporter activity [GO:0015078]; ubiquitin protein ligase binding [GO:0031625]	adaptive thermogenesis [GO:1990845]; adenine nucleotide transport [GO:0051503]; B cell differentiation [GO:0030183]; cellular response to leukemia inhibitory factor [GO:1990830]; chromosome segregation [GO:0007059]; erythrocyte differentiation [GO:0030218]; mitochondrial ADP transmembrane transport [GO:0140021]; mitochondrial ATP transmembrane transport [GO:1990544]; negative regulation of mitoch…
[850-2]	1	P84078	1	1	9.9	2	3	0.145066	6.1	20697	MOUSE	ADP-ribosylation factor 1					P84078	P84078	reviewed	ARF1_MOUSE	ADP-ribosylation factor 1 (EC 3.6.5.2)	Arf1	Mus musculus (Mouse)	181	FUNCTION: Small GTPase involved in protein trafficking between different compartments (PubMed:11950392). Modulates vesicle budding and uncoating within the Golgi complex (By similarity). In its GTP-bound form, triggers the recruitment of coatomer proteins to the Golgi membrane (By similarity). The hydrolysis of ARF1-bound GTP, which is mediated by ARFGAPs proteins, is required for dissociation of…	5.0	GDP binding [GO:0019003]; GTP binding [GO:0005525]; GTPase activity [GO:0003924]; magnesium ion binding [GO:0000287]; phospholipase D activator activity [GO:1990583]; protein domain specific binding [GO:0019904]	actin filament organization [GO:0007015]; cellular response to virus [GO:0098586]; dendritic spine organization [GO:0097061]; Golgi to transport vesicle transport [GO:0055108]; intracellular copper ion homeostasis [GO:0006878]; intracellular protein transport [GO:0006886]; long-term synaptic depression [GO:0060292]; lysosomal membrane organization [GO:0097212]; mitotic cleavage furrow ingression …
[850-1]	1	P61205	1	1	9.9	2	3	0.145066	6.1	20600.9	MOUSE	ADP-ribosylation factor 3					P61205	P61205	reviewed	ARF3_MOUSE	ADP-ribosylation factor 3	Arf3	Mus musculus (Mouse)	181	FUNCTION: GTP-binding protein that functions as an allosteric activator of the cholera toxin catalytic subunit, an ADP-ribosyltransferase. Involved in protein trafficking; may modulate vesicle budding and uncoating within the Golgi apparatus.	4.0	GTP binding [GO:0005525]; GTPase activity [GO:0003924]	intracellular protein transport [GO:0006886]; protein transport [GO:0015031]; retrograde vesicle-mediated transport, Golgi to endoplasmic reticulum [GO:0006890]; vesicle-mediated transport [GO:0016192]
[850]		P61750				3	4	0	10	20396.8	MOUSE	ADP-ribosylation factor 4					P61750	P61750	reviewed	ARF4_MOUSE	ADP-ribosylation factor 4	Arf4	Mus musculus (Mouse)	180	FUNCTION: GTP-binding protein that functions as an allosteric activator of the cholera toxin catalytic subunit, an ADP-ribosyltransferase. Involved in protein trafficking; may modulate vesicle budding and uncoating within the Golgi apparatus.	5.0	epidermal growth factor receptor binding [GO:0005154]; GTP binding [GO:0005525]; GTPase activity [GO:0003924]; NAD+-protein-arginine ADP-ribosyltransferase activity [GO:0106274]	activation of phospholipase D activity [GO:0031584]; apical protein localization [GO:0045176]; cell migration [GO:0016477]; dendritic spine development [GO:0060996]; epidermal growth factor receptor signaling pathway [GO:0007173]; establishment or maintenance of epithelial cell apical/basal polarity [GO:0045197]; intracellular protein transport [GO:0006886]; learning [GO:0007612]; negative regula…
[1151]		P62331				3	3	0	12.6	20082.3	MOUSE	ADP-ribosylation factor 6					P62331	P62331	reviewed	ARF6_MOUSE	ADP-ribosylation factor 6 (EC 3.6.5.2)	Arf6	Mus musculus (Mouse)	175	FUNCTION: GTP-binding protein involved in protein trafficking that regulates endocytic recycling and cytoskeleton remodeling (PubMed:11950392). Required for normal completion of mitotic cytokinesis. Involved in the regulation of dendritic spine development, contributing to the regulation of dendritic branching and filopodia extension. Plays an important role in membrane trafficking, during juncti…	5.0	G protein activity [GO:0003925]; GDP binding [GO:0019003]; GTP binding [GO:0005525]; GTPase activity [GO:0003924]; thioesterase binding [GO:0031996]	cell cycle [GO:0007049]; cell differentiation [GO:0030154]; cell division [GO:0051301]; cellular response to nerve growth factor stimulus [GO:1990090]; cortical actin cytoskeleton organization [GO:0030866]; endocytic recycling [GO:0032456]; erythrocyte apoptotic process [GO:1902217]; establishment of epithelial cell polarity [GO:0090162]; hepatocyte apoptotic process [GO:0097284]; intracellular p…
[775]		Q9EPJ9	2	2	6					45288.6	MOUSE	ADP-ribosylation factor GTPase-activating protein 1					Q9EPJ9	Q9EPJ9	reviewed	ARFG1_MOUSE	ADP-ribosylation factor GTPase-activating protein 1 (ARF GAP 1) (ADP-ribosylation factor 1 GTPase-activating protein) (ARF1 GAP) (ARF1-directed GTPase-activating protein)	Arfgap1 Arf1gap	Mus musculus (Mouse)	414	FUNCTION: GTPase-activating protein (GAP) for the ADP ribosylation factor 1 (ARF1). Involved in membrane trafficking and /or vesicle transport. Promotes hydrolysis of the ARF1-bound GTP and thus, is required for the dissociation of coat proteins from Golgi-derived membranes and vesicles, a prerequisite for vesicle's fusion with target compartment. Probably regulates ARF1-mediated transport via it…	4.0	GTPase activator activity [GO:0005096]; metal ion binding [GO:0046872]	protein transport [GO:0015031]; regulation of ARF protein signal transduction [GO:0032012]; regulation of endocytosis [GO:0030100]; vesicle-mediated transport [GO:0016192]
[984]		Q9D0J4	1	1	6.5					20864.1	MOUSE	ADP-ribosylation factor-like protein 2					Q9D0J4	Q9D0J4	reviewed	ARL2_MOUSE	ADP-ribosylation factor-like protein 2	Arl2	Mus musculus (Mouse)	184	FUNCTION: Small GTP-binding protein which cycles between an inactive GDP-bound and an active GTP-bound form, and the rate of cycling is regulated by guanine nucleotide exchange factors (GEF) and GTPase-activating proteins (GAP). GTP-binding protein that does not act as an allosteric activator of the cholera toxin catalytic subunit. Regulates formation of new microtubules and centrosome integrity.…	5.0	GDP binding [GO:0019003]; GTP binding [GO:0005525]; GTPase activity [GO:0003924]	acetylcholine transport [GO:0015870]; bicellular tight junction assembly [GO:0070830]; centrosome cycle [GO:0007098]; maintenance of protein location in nucleus [GO:0051457]; negative regulation of GTPase activity [GO:0034260]; positive regulation of cell-substrate adhesion [GO:0010811]; positive regulation of microtubule polymerization [GO:0031116]; protein folding [GO:0006457]; regulation of ae…
[1372]		Q8VEH3				1	1	0	4.8	21390.1	MOUSE	ADP-ribosylation factor-like protein 8A					Q8VEH3	Q8VEH3	reviewed	ARL8A_MOUSE	ADP-ribosylation factor-like protein 8A (ADP-ribosylation factor-like protein 10B) (Novel small G protein indispensable for equal chromosome segregation 2)	Arl8a Arl10b Gie2	Mus musculus (Mouse)	186	FUNCTION: Plays a role in lysosomes motility (PubMed:30174114). In neurons, mediates the anterograde axonal long-range transport of presynaptic lysosome-related vesicles required for presynaptic biogenesis and synaptic function (PubMed:30174114). May play a role in chromosome segregation (By similarity). {ECO:0000250|UniProtKB:Q9NVJ2, ECO:0000269|PubMed:30174114}.	4.0	GTP binding [GO:0005525]; GTPase activity [GO:0003924]	anterograde axonal transport [GO:0008089]; cell division [GO:0051301]; chromosome segregation [GO:0007059]; protein transport [GO:0015031]
[334]		Q9JKX6	9	16	50.9					23984.5	MOUSE	ADP-sugar pyrophosphatase					Q9JKX6	Q9JKX6	reviewed	NUDT5_MOUSE	ADP-sugar pyrophosphatase (EC 3.6.1.13) (8-oxo-dGDP phosphatase) (EC 3.6.1.58) (Nuclear ATP-synthesis protein NUDIX5) (EC 2.7.7.96) (Nucleoside diphosphate-linked moiety X motif 5) (Nudix motif 5)	Nudt5	Mus musculus (Mouse)	218	FUNCTION: Enzyme that can either act as an ADP-sugar pyrophosphatase in absence of diphosphate or catalyze the synthesis of ATP in presence of diphosphate (By similarity). In absence of diphosphate, hydrolyzes with similar activities various modified nucleoside diphosphates such as ADP-ribose, ADP-mannose, ADP-glucose, 8-oxo-GDP and 8-oxo-dGDP (PubMed:10722730). Can also hydrolyze other nucleotid…	5.0	8-oxo-dGDP phosphatase activity [GO:0044715]; 8-oxo-GDP phosphatase activity [GO:0044716]; ADP-ribose diphosphatase activity [GO:0047631]; ADP-sugar diphosphatase activity [GO:0019144]; identical protein binding [GO:0042802]; magnesium ion binding [GO:0000287]; nucleoside diphosphate phosphatase activity [GO:0017110]; nucleotidyltransferase activity [GO:0016779]; protein homodimerization activity…	ATP generation from poly-ADP-D-ribose [GO:1990966]; chromatin remodeling [GO:0006338]; D-ribose catabolic process [GO:0019303]; nucleobase-containing compound metabolic process [GO:0006139]; nucleoside phosphate metabolic process [GO:0006753]; ribonucleoside diphosphate catabolic process [GO:0009191]; ribose phosphate metabolic process [GO:0019693]
[819]		O08915	2	2	9.4					37605.3	MOUSE	AH receptor-interacting protein					O08915	O08915	reviewed	AIP_MOUSE	AH receptor-interacting protein (AIP) (Aryl-hydrocarbon receptor-interacting protein)	Aip	Mus musculus (Mouse)	330	FUNCTION: May play a positive role in AHR-mediated (aromatic hydrocarbon receptor) signaling, possibly by influencing its receptivity for ligand and/or its nuclear targeting.	5.0	aryl hydrocarbon receptor binding [GO:0017162]; GAF domain binding [GO:0036004]; peptidyl-prolyl cis-trans isomerase activity [GO:0003755]; transcription coregulator activity [GO:0003712]; unfolded protein binding [GO:0051082]	negative regulation of cyclic-nucleotide phosphodiesterase activity [GO:0051344]; protein maturation by protein folding [GO:0022417]; protein targeting to mitochondrion [GO:0006626]; regulation of protein kinase A signaling [GO:0010738]; xenobiotic metabolic process [GO:0006805]
[997]		O08715	2	2	4.2					92195.5	MOUSE	A-kinase anchor protein 1, mitochondrial					O08715	O08715	reviewed	AKAP1_MOUSE	A-kinase anchor protein 1, mitochondrial (Dual specificity A-kinase-anchoring protein 1) (D-AKAP-1) (Protein kinase A-anchoring protein 1) (PRKA1) (Spermatid A-kinase anchor protein) (S-AKAP)	Akap1 Akap	Mus musculus (Mouse)	857	FUNCTION: Differentially targeted protein that binds to type I and II regulatory subunits of protein kinase A (PubMed:9065479, PubMed:9182549). Anchors them to the cytoplasmic face of the mitochondrial outer membrane or allows them to reside in the endoplasmic reticulum (PubMed:9065479, PubMed:9182549). Involved in mitochondrial-mediated antiviral innate immunity (By similarity). Promotes translo…	5.0	beta-tubulin binding [GO:0048487]; microtubule binding [GO:0008017]; molecular adaptor activity [GO:0060090]; protein kinase A regulatory subunit binding [GO:0034237]; protein kinase binding [GO:0019901]; protein phosphatase 2B binding [GO:0030346]; protein phosphatase binding [GO:0019903]; RNA binding [GO:0003723]	antiviral innate immune response [GO:0140374]; apoptotic process [GO:0006915]; negative regulation of cardiac muscle hypertrophy [GO:0010614]; negative regulation of protein dephosphorylation [GO:0035308]; negative regulation of protein import into nucleus [GO:0042308]
[1392]		Q9WTQ5				2	3	0	1.2	180696	MOUSE	A-kinase anchor protein 12					Q9WTQ5	Q9WTQ5	reviewed	AKA12_MOUSE	A-kinase anchor protein 12 (AKAP-12) (Germ cell lineage protein gercelin) (Src-suppressed C kinase substrate) (SSeCKS)	Akap12 Gag12 Ssecks	Mus musculus (Mouse)	1684	FUNCTION: Anchoring protein that mediates the subcellular compartmentation of protein kinase A (PKA) and protein kinase C (PKC). {ECO:0000250}.	5.0	adenylate cyclase binding [GO:0008179]; calmodulin binding [GO:0005516]; protein kinase A binding [GO:0051018]; signaling receptor complex adaptor activity [GO:0030159]	adenylate cyclase-inhibiting G protein-coupled receptor signaling pathway [GO:0007193]; cellular response to interleukin-1 [GO:0071347]; cellular response to tumor necrosis factor [GO:0071356]; hepatic stellate cell activation [GO:0035733]; modulation of chemical synaptic transmission [GO:0050804]; negative regulation of vascular permeability [GO:0043116]; positive regulation of ERK1 and ERK2 cas…
[604]		Q9DBR0	2	2	3.5	5	6	0.145066	6.3	76294.6	MOUSE	A-kinase anchor protein 8					Q9DBR0	Q9DBR0	reviewed	AKAP8_MOUSE	A-kinase anchor protein 8 (AKAP-8) (A-kinase anchor protein 95 kDa) (AKAP 95)	Akap8 Akap95	Mus musculus (Mouse)	687	FUNCTION: Anchoring protein that mediates the subcellular compartmentation of cAMP-dependent protein kinase (PKA type II). Acts as an anchor for a PKA-signaling complex onto mitotic chromosomes, which is required for maintenance of chromosomes in a condensed form throughout mitosis. Recruits condensin complex subunit NCAPD2 to chromosomes required for chromatin condensation; the function appears …	5.0	chromatin binding [GO:0003682]; DNA binding [GO:0003677]; double-stranded DNA binding [GO:0003690]; histone deacetylase binding [GO:0042826]; NF-kappaB binding [GO:0051059]; protein kinase A regulatory subunit binding [GO:0034237]; zinc ion binding [GO:0008270]	cell cycle G2/M phase transition [GO:0044839]; cellular response to lipopolysaccharide [GO:0071222]; cellular response to prostaglandin E stimulus [GO:0071380]; innate immune response [GO:0045087]; mitotic chromosome condensation [GO:0007076]; negative regulation of tumor necrosis factor production [GO:0032720]; positive regulation of histone deacetylation [GO:0031065]; protein transport [GO:0015…
[454]		P58742	7	9	15.6					59431.2	MOUSE	Aladin					P58742	P58742	reviewed	AAAS_MOUSE	Aladin (Adracalin)	Aaas	Mus musculus (Mouse)	546	FUNCTION: Plays a role in the normal development of the peripheral and central nervous system. Required for the correct localization of aurora kinase AURKA and the microtubule minus end-binding protein NUMA1 as well as a subset of AURKA targets which ensures proper spindle formation and timely chromosome alignment. {ECO:0000250|UniProtKB:Q9NRG9}.	5.0		fertilization [GO:0009566]; learning [GO:0007612]; microtubule bundle formation [GO:0001578]; mitotic spindle assembly [GO:0090307]; mRNA transport [GO:0051028]; nucleocytoplasmic transport [GO:0006913]; protein transport [GO:0015031]
[812]		Q8BGQ7				3	3	0	3.3	106910	MOUSE	Alanine--tRNA ligase, cytoplasmic					Q8BGQ7	Q8BGQ7	reviewed	SYAC_MOUSE	Alanine--tRNA ligase, cytoplasmic (EC 6.1.1.7) (Alanyl-tRNA synthetase) (AlaRS) (Protein sticky) (Sti)	Aars1 Aars	Mus musculus (Mouse)	968	FUNCTION: Catalyzes the attachment of alanine to tRNA(Ala) in a two-step reaction: alanine is first activated by ATP to form Ala-AMP and then transferred to the acceptor end of tRNA(Ala) (PubMed:16906134, PubMed:20010690, PubMed:25422440, PubMed:27622773). Also edits incorrectly charged tRNA(Ala) via its editing domain (PubMed:16906134, PubMed:20010690, PubMed:25422440, PubMed:29769718). {ECO:000…	5.0	alanine-tRNA ligase activity [GO:0004813]; amino acid binding [GO:0016597]; aminoacyl-tRNA editing activity [GO:0002161]; ATP binding [GO:0005524]; Ser-tRNA(Ala) hydrolase activity [GO:0002196]; translation regulator activity [GO:0045182]; tRNA binding [GO:0000049]; zinc ion binding [GO:0008270]	alanyl-tRNA aminoacylation [GO:0006419]; cerebellar Purkinje cell layer development [GO:0021680]; negative regulation of neuron apoptotic process [GO:0043524]; neuromuscular process [GO:0050905]; neuromuscular process controlling balance [GO:0050885]; neuron apoptotic process [GO:0051402]; regulation of cytoplasmic translational fidelity [GO:0140018]; tRNA modification [GO:0006400]
[120]		P47738	19	22	58.2					56538	MOUSE	Aldehyde dehydrogenase, mitochondrial					P47738	P47738	reviewed	ALDH2_MOUSE	Aldehyde dehydrogenase, mitochondrial (EC 1.2.1.3) (AHD-M1) (ALDH class 2) (ALDH-E2) (ALDHI)	Aldh2 Ahd-1 Ahd1	Mus musculus (Mouse)	519	FUNCTION: Required for clearance of cellular formaldehyde, a cytotoxic and carcinogenic metabolite that induces DNA damage. {ECO:0000250|UniProtKB:P05091}.	5.0	aldehyde dehydrogenase (NAD+) activity [GO:0004029]; carboxylesterase activity [GO:0106435]; glyceraldehyde-3-phosphate dehydrogenase (NAD+) (non-phosphorylating) activity [GO:0043878]; identical protein binding [GO:0042802]; NAD binding [GO:0051287]; NADH binding [GO:0070404]; nitroglycerin reductase activity [GO:0018547]; phenylacetaldehyde dehydrogenase activity [GO:0008957]	acetaldehyde metabolic process [GO:0006117]; aldehyde catabolic process [GO:0046185]; behavioral response to ethanol [GO:0048149]; cellular detoxification of aldehyde [GO:0110095]; ethanol catabolic process [GO:0006068]; intrinsic apoptotic signaling pathway in response to oxidative stress [GO:0008631]; negative regulation of apoptotic process [GO:0043066]; regulation of dopamine biosynthetic pro…
[698]		P45376				5	5	0	16.8	35732.6	MOUSE	Aldose reductase					P45376	P45376	reviewed	ALDR_MOUSE	Aldo-keto reductase family 1 member B1 (EC 1.1.1.300) (EC 1.1.1.372) (EC 1.1.1.54) (Aldehyde reductase) (Aldo-keto reductase family 1 member B3) (Aldose reductase) (AR) (EC 1.1.1.21)	Akr1b1 Akr1b3 Aldor1 Aldr1 Alr2	Mus musculus (Mouse)	316	FUNCTION: Catalyzes the NADPH-dependent reduction of a wide variety of carbonyl-containing compounds to their corresponding alcohols (PubMed:17381426, PubMed:19010934, PubMed:7851421). Displays enzymatic activity towards endogenous metabolites such as aromatic and aliphatic aldehydes, ketones, monosacharides, bile acids and xenobiotics substrates. Key enzyme in the polyol pathway, catalyzes reduc…	5.0	alditol:NADP+ 1-oxidoreductase activity [GO:0004032]; allyl-alcohol dehydrogenase activity [GO:0047655]; cis-1,2-dihydro-1,2-dihydroxynaphthalene dehydrogenase activity [GO:0018505]; glyceraldehyde oxidoreductase activity [GO:0043795]; glycerol dehydrogenase [NADP+] activity [GO:0047956]; L-glucuronate reductase activity [GO:0047939]; NADP-retinol dehydrogenase activity [GO:0052650]; prostaglandi…	cellular hyperosmotic salinity response [GO:0071475]; cellular response to hydrogen peroxide [GO:0070301]; cellular response to methylglyoxal [GO:0097238]; daunorubicin metabolic process [GO:0044597]; doxorubicin metabolic process [GO:0044598]; epithelial cell maturation [GO:0002070]; fructose biosynthetic process [GO:0046370]; inner medullary collecting duct development [GO:0072061]; L-ascorbic …
[362]		Q8C0I1	8	9	22.3					71684.1	MOUSE	Alkyldihydroxyacetonephosphate synthase, peroxisomal					Q8C0I1	Q8C0I1	reviewed	ADAS_MOUSE	Alkyldihydroxyacetonephosphate synthase, peroxisomal (Alkyl-DHAP synthase) (EC 2.5.1.26) (Alkylglycerone-phosphate synthase)	Agps	Mus musculus (Mouse)	645	FUNCTION: Catalyzes the exchange of the acyl chain in acyl-dihydroxyacetonephosphate (acyl-DHAP) for a long chain fatty alcohol, yielding the first ether linked intermediate, i.e. alkyl-dihydroxyacetonephosphate (alkyl-DHAP), in the pathway of ether lipid biosynthesis. {ECO:0000269|PubMed:6833249}.	5.0	alkylglycerone-phosphate synthase activity [GO:0008609]; FAD binding [GO:0071949]	ether lipid biosynthetic process [GO:0008611]; lipid biosynthetic process [GO:0008610]
[631]		Q9DBE8	3	4	11.8					47405.4	MOUSE	Alpha-1,3/1,6-mannosyltransferase ALG2					Q9DBE8	Q9DBE8	reviewed	ALG2_MOUSE	Alpha-1,3/1,6-mannosyltransferase ALG2 (EC 2.4.1.132) (EC 2.4.1.257) (Asparagine-linked glycosylation protein 2 homolog) (GDP-Man:Man(1)GlcNAc(2)-PP-Dol alpha-1,3-mannosyltransferase) (GDP-Man:Man(1)GlcNAc(2)-PP-dolichol mannosyltransferase) (GDP-Man:Man(2)GlcNAc(2)-PP-Dol alpha-1,6-mannosyltransferase)	Alg2 MNCb-5081	Mus musculus (Mouse)	415	FUNCTION: Mannosylates Man(2)GlcNAc(2)-dolichol diphosphate and Man(1)GlcNAc(2)-dolichol diphosphate to form Man(3)GlcNAc(2)-dolichol diphosphate. {ECO:0000250|UniProtKB:Q9H553}.	4.0	alpha-1,3-mannosyltransferase activity [GO:0000033]; calcium-dependent protein binding [GO:0048306]; GDP-Man:Man1GlcNAc2-PP-Dol alpha-1,3-mannosyltransferase activity [GO:0004378]; GDP-Man:Man2GlcNAc2-PP-dolichol alpha-1,6-mannosyltransferase activity [GO:0102704]; protein heterodimerization activity [GO:0046982]	dolichol-linked oligosaccharide biosynthetic process [GO:0006488]; oligosaccharide-lipid intermediate biosynthetic process [GO:0006490]; protein glycosylation [GO:0006486]; response to calcium ion [GO:0051592]
[13-1]	29	Q7TPR4	48	81	67.2	1	1	35.2511	1.1	103069	MOUSE	Alpha-actinin-1					Q7TPR4	Q7TPR4	reviewed	ACTN1_MOUSE	Alpha-actinin-1 (Alpha-actinin cytoskeletal isoform) (F-actin cross-linking protein) (Non-muscle alpha-actinin-1)	Actn1	Mus musculus (Mouse)	892	FUNCTION: F-actin cross-linking protein which is thought to anchor actin to a variety of intracellular structures. This is a bundling protein (By similarity). {ECO:0000250}.	5.0	actin filament binding [GO:0051015]; calcium ion binding [GO:0005509]; cytoskeletal regulatory protein binding [GO:0005519]; double-stranded RNA binding [GO:0003725]; integrin binding [GO:0005178]; nuclear receptor coactivator activity [GO:0030374]; protein domain specific binding [GO:0019904]; protein homodimerization activity [GO:0042803]; structural constituent of postsynapse [GO:0099186]; tra…	actin cytoskeleton organization [GO:0030036]; actin filament bundle assembly [GO:0051017]; actin filament network formation [GO:0051639]; actin filament organization [GO:0007015]; cortical cytoskeleton organization [GO:0030865]; focal adhesion assembly [GO:0048041]; muscle cell development [GO:0055001]; platelet formation [GO:0030220]; platelet morphogenesis [GO:0036344]
[13]		P57780	60	102	77.5	2	2	22.1951	1.8	104978	MOUSE	Alpha-actinin-4					P57780	P57780	reviewed	ACTN4_MOUSE	Alpha-actinin-4 (Non-muscle alpha-actinin 4)	Actn4	Mus musculus (Mouse)	912	FUNCTION: F-actin cross-linking protein which is thought to anchor actin to a variety of intracellular structures. This is a bundling protein. Probably involved in vesicular trafficking via its association with the CART complex. The CART complex is necessary for efficient transferrin receptor recycling but not for EGFR degradation (By similarity). Involved in tight junction assembly in epithelial…	5.0	actin filament binding [GO:0051015]; calcium ion binding [GO:0005509]; chromatin DNA binding [GO:0031490]; nuclear receptor binding [GO:0016922]; nuclear receptor coactivator activity [GO:0030374]; nuclear retinoic acid receptor binding [GO:0042974]; nucleoside binding [GO:0001882]; protein homodimerization activity [GO:0042803]; protein-containing complex binding [GO:0044877]; RNA polymerase II …	actin cytoskeleton organization [GO:0030036]; actin filament bundle assembly [GO:0051017]; bicellular tight junction assembly [GO:0070830]; glomerulus development [GO:0032835]; muscle cell development [GO:0055001]; negative regulation of substrate adhesion-dependent cell spreading [GO:1900025]; peroxisome proliferator activated receptor signaling pathway [GO:0035357]; podocyte cell migration [GO:…
[644]		P61164	3	3	10.9					42614.1	MOUSE	Alpha-centractin					P61164	P61164	reviewed	ACTZ_MOUSE	Alpha-centractin (Centractin) (ARP1) (Actin-RPV) (Centrosome-associated actin homolog)	Actr1a Ctrn1	Mus musculus (Mouse)	376	FUNCTION: Part of the ACTR1A/ACTB filament around which the dynactin complex is built. The dynactin multiprotein complex activates the molecular motor dynein for ultra-processive transport along microtubules. {ECO:0000250|UniProtKB:F2Z5G5}.	3.0	ATP binding [GO:0005524]
[271]		P17182				9	20	0	23.5	47141.2	MOUSE	Alpha-enolase					P17182	P17182	reviewed	ENOA_MOUSE	Alpha-enolase (EC 4.2.1.11) (2-phospho-D-glycerate hydro-lyase) (Enolase 1) (Non-neural enolase) (NNE)	Eno1 Eno-1	Mus musculus (Mouse)	434	FUNCTION: Glycolytic enzyme the catalyzes the conversion of 2-phosphoglycerate to phosphoenolpyruvate. In addition to glycolysis, involved in various processes such as growth control, hypoxia tolerance and allergic responses. May also function in the intravascular and pericellular fibrinolytic system due to its ability to serve as a receptor and activator of plasminogen on the cell surface of sev…	5.0	DNA-binding transcription repressor activity, RNA polymerase II-specific [GO:0001227]; enzyme binding [GO:0019899]; GTPase binding [GO:0051020]; heat shock protein binding [GO:0031072]; identical protein binding [GO:0042802]; magnesium ion binding [GO:0000287]; phosphopyruvate hydratase activity [GO:0004634]; protein homodimerization activity [GO:0042803]; protein-containing complex binding [GO:0…	canonical glycolysis [GO:0061621]; cellular response to interleukin-7 [GO:0098761]; gluconeogenesis [GO:0006094]; glycolytic process [GO:0006096]; in utero embryonic development [GO:0001701]; negative regulation of cell growth [GO:0030308]; negative regulation of DNA-templated transcription [GO:0045892]; negative regulation of hypoxia-induced intrinsic apoptotic signaling pathway [GO:1903298]; ne…
[1243]		P51569	2	2	4.5					47643.1	MOUSE	Alpha-galactosidase A					P51569	P51569	reviewed	AGAL_MOUSE	Alpha-galactosidase A (EC 3.2.1.22) (Alpha-D-galactosidase A) (Alpha-D-galactoside galactohydrolase) (Galactosylgalactosylglucosylceramidase GLA) (Melibiase)	Gla Ags	Mus musculus (Mouse)	419	FUNCTION: Catalyzes the hydrolysis of glycosphingolipids and participates in their degradation in the lysosome. {ECO:0000250|UniProtKB:P06280}.	5.0	alpha-galactosidase activity [GO:0004557]; catalytic activity [GO:0003824]; galactoside binding [GO:0016936]; galactosylgalactosylglucosylceramidase activity [GO:0017041]; hydrolase activity [GO:0016787]; protein homodimerization activity [GO:0042803]; raffinose alpha-galactosidase activity [GO:0052692]; signaling receptor binding [GO:0005102]	aorta development [GO:0035904]; glycoside catabolic process [GO:0016139]; glycosphingolipid catabolic process [GO:0046479]; glycosylceramide catabolic process [GO:0046477]; negative regulation of nitric oxide biosynthetic process [GO:0045019]; negative regulation of nitric-oxide synthase activity [GO:0051001]; oligosaccharide metabolic process [GO:0009311]
[753]		Q91W89	2	2	2.9					115689	MOUSE	Alpha-mannosidase 2C1					Q91W89	Q91W89	reviewed	MA2C1_MOUSE	Alpha-mannosidase 2C1 (EC 3.2.1.24) (Alpha-D-mannoside mannohydrolase) (Mannosidase alpha class 2C member 1) (Neutral/cytosolic alpha-mannosidase)	Man2c1	Mus musculus (Mouse)	1039	FUNCTION: Cleaves alpha 1,2-, alpha 1,3-, and alpha 1,6-linked mannose residues from glycoproteins. Involved in the degradation of free oligosaccharides in the cytoplasm. {ECO:0000269|PubMed:16904268, ECO:0000269|PubMed:24550399}.	5.0	alpha-mannosidase activity [GO:0004559]; carbohydrate binding [GO:0030246]; metal ion binding [GO:0046872]	mannose metabolic process [GO:0006013]; oligosaccharide catabolic process [GO:0009313]
[1095]		Q9DB05	1	1	8.5					33190	MOUSE	Alpha-soluble NSF attachment protein					Q9DB05	Q9DB05	reviewed	SNAA_MOUSE	Alpha-soluble NSF attachment protein (SNAP-alpha) (N-ethylmaleimide-sensitive factor attachment protein alpha)	Napa Snapa	Mus musculus (Mouse)	295	FUNCTION: Required for vesicular transport between the endoplasmic reticulum and the Golgi apparatus. Together with GNA12 promotes CDH5 localization to plasma membrane. {ECO:0000250|UniProtKB:P54920}.	5.0	protein-containing complex binding [GO:0044877]; SNARE binding [GO:0000149]; soluble NSF attachment protein activity [GO:0005483]; syntaxin binding [GO:0019905]	apical protein localization [GO:0045176]; brain development [GO:0007420]; intracellular protein transport [GO:0006886]; neuron differentiation [GO:0030182]; positive regulation of ATP-dependent activity [GO:0032781]; protein-containing complex disassembly [GO:0032984]; regulation of synaptic vesicle priming [GO:0010807]; SNARE complex disassembly [GO:0035494]; synaptic transmission, glutamatergic…
[654]		Q920R0	4	4	3.5					182568	MOUSE	Alsin					Q920R0	Q920R0	reviewed	ALS2_MOUSE	Alsin (Amyotrophic lateral sclerosis 2 protein homolog)	Als2	Mus musculus (Mouse)	1651	FUNCTION: May act as a GTPase regulator. Controls survival and growth of spinal motoneurons. {ECO:0000250}.	5.0	GTPase activator activity [GO:0005096]; guanyl-nucleotide exchange factor activity [GO:0005085]; identical protein binding [GO:0042802]; protein homodimerization activity [GO:0042803]; protein serine/threonine kinase activator activity [GO:0043539]; small GTPase binding [GO:0031267]	axonogenesis [GO:0007409]; behavioral fear response [GO:0001662]; cell death [GO:0008219]; endosomal transport [GO:0016197]; endosome organization [GO:0007032]; in utero embryonic development [GO:0001701]; locomotory behavior [GO:0007626]; lysosomal transport [GO:0007041]; neuromuscular junction development [GO:0007528]; neuron projection morphogenesis [GO:0048812]; positive regulation of GTPase …
[242]		P31230	12	16	58.7					33997.6	MOUSE	Aminoacyl tRNA synthase complex-interacting multifunctional protein 1					P31230	P31230	reviewed	AIMP1_MOUSE	Aminoacyl tRNA synthase complex-interacting multifunctional protein 1 (Multisynthase complex auxiliary component p43) [Cleaved into: Endothelial monocyte-activating polypeptide 2 (EMAP-2) (Endothelial monocyte-activating polypeptide II) (EMAP-II) (Small inducible cytokine subfamily E member 1)]	Aimp1 Emap2 Scye1	Mus musculus (Mouse)	310	FUNCTION: Non-catalytic component of the multisynthase complex (PubMed:12060739). Stimulates the catalytic activity of cytoplasmic arginyl-tRNA synthase (By similarity). Binds tRNA. Possesses inflammatory cytokine activity (PubMed:1400342, PubMed:7545917). Negatively regulates TGF-beta signaling through stabilization of SMURF2 by binding to SMURF2 and inhibiting its SMAD7-mediated degradation (Pu…	5.0	cytokine activity [GO:0005125]; GTPase binding [GO:0051020]; protein homodimerization activity [GO:0042803]; tRNA binding [GO:0000049]	angiogenesis [GO:0001525]; apoptotic process [GO:0006915]; cell-cell signaling [GO:0007267]; inflammatory response [GO:0006954]; leukocyte migration [GO:0050900]; negative regulation of endothelial cell proliferation [GO:0001937]; positive regulation of glucagon secretion [GO:0070094]; translation [GO:0006412]
[252]		Q8R010	11	18	42.2					35377.9	MOUSE	Aminoacyl tRNA synthase complex-interacting multifunctional protein 2					Q8R010	Q8R010	reviewed	AIMP2_MOUSE	Aminoacyl tRNA synthase complex-interacting multifunctional protein 2 (Multisynthase complex auxiliary component p38) (Protein JTV-1)	Aimp2 Jtv1	Mus musculus (Mouse)	320	FUNCTION: Required for assembly and stability of the aminoacyl-tRNA synthase complex (PubMed:12060739). Mediates ubiquitination and degradation of FUBP1, a transcriptional activator of MYC, leading to MYC down-regulation which is required for aveolar type II cell differentiation (PubMed:12819782). Blocks MDM2-mediated ubiquitination and degradation of p53/TP53 (PubMed:18695251). Functions as a pr…	5.0	molecular adaptor activity [GO:0060090]	apoptotic process [GO:0006915]; negative regulation of cell population proliferation [GO:0008285]; positive regulation of aminoacyl-tRNA ligase activity [GO:1903632]; positive regulation of neuron apoptotic process [GO:0043525]; positive regulation of protein ubiquitination [GO:0031398]; protein ubiquitination [GO:0016567]; protein-containing complex assembly [GO:0065003]; translation [GO:0006412…
[477]		P53995	9	13	6.4					215996	MOUSE	Anaphase-promoting complex subunit 1					P53995	P53995	reviewed	APC1_MOUSE	Anaphase-promoting complex subunit 1 (APC1) (Cyclosome subunit 1) (Mitotic checkpoint regulator) (Testis-specific gene 24 protein)	Anapc1 Mcpr Tsg24	Mus musculus (Mouse)	1944	FUNCTION: Component of the anaphase promoting complex/cyclosome (APC/C), a cell cycle-regulated E3 ubiquitin ligase that controls progression through mitosis and the G1 phase of the cell cycle. The APC/C complex acts by mediating ubiquitination and subsequent degradation of target proteins: it mainly mediates the formation of 'Lys-11'-linked polyubiquitin chains and, to a lower extent, the format…	4.0	molecular adaptor activity [GO:0060090]	anaphase-promoting complex-dependent catabolic process [GO:0031145]; cell division [GO:0051301]; metaphase/anaphase transition of mitotic cell cycle [GO:0007091]; protein K11-linked ubiquitination [GO:0070979]
[734]		Q8BTZ4	4	5	8.9					83098.4	MOUSE	Anaphase-promoting complex subunit 5					Q8BTZ4	Q8BTZ4	reviewed	APC5_MOUSE	Anaphase-promoting complex subunit 5 (APC5) (Cyclosome subunit 5)	Anapc5 MNCb-2778	Mus musculus (Mouse)	740	FUNCTION: Component of the anaphase promoting complex/cyclosome (APC/C), a cell cycle-regulated E3 ubiquitin ligase that controls progression through mitosis and the G1 phase of the cell cycle. The APC/C complex acts by mediating ubiquitination and subsequent degradation of target proteins: it mainly mediates the formation of 'Lys-11'-linked polyubiquitin chains and, to a lower extent, the format…	4.0	protein phosphatase binding [GO:0019903]	anaphase-promoting complex-dependent catabolic process [GO:0031145]; cell cycle [GO:0007049]; cell division [GO:0051301]; positive regulation of mitotic metaphase/anaphase transition [GO:0045842]; protein K11-linked ubiquitination [GO:0070979]
[629]		Q9WVM3	3	4	9.2					63021.6	MOUSE	Anaphase-promoting complex subunit 7					Q9WVM3	Q9WVM3	reviewed	APC7_MOUSE	Anaphase-promoting complex subunit 7 (APC7) (Cyclosome subunit 7) (Prediabetic NOD sera-reactive autoantigen)	Anapc7 Apc7	Mus musculus (Mouse)	565	FUNCTION: Component of the anaphase promoting complex/cyclosome (APC/C), a cell cycle-regulated E3 ubiquitin ligase that controls progression through mitosis and the G1 phase of the cell cycle. The APC/C complex acts by mediating ubiquitination and subsequent degradation of target proteins: it mainly mediates the formation of 'Lys-11'-linked polyubiquitin chains and, to a lower extent, the format…	5.0	enzyme-substrate adaptor activity [GO:0140767]; protein phosphatase binding [GO:0019903]	brain development [GO:0007420]; cell cycle [GO:0007049]; cell division [GO:0051301]; positive regulation of mitotic metaphase/anaphase transition [GO:0045842]; protein K11-linked ubiquitination [GO:0070979]; protein ubiquitination [GO:0016567]
[1352]		Q99LJ2	1	1	4.2					54058.3	MOUSE	Ankyrin repeat and BTB/POZ domain-containing protein 1					Q99LJ2	Q99LJ2	reviewed	ABTB1_MOUSE	Ankyrin repeat and BTB/POZ domain-containing protein 1	Abtb1 Bpoz	Mus musculus (Mouse)	478	FUNCTION: May act as a mediator of the PTEN growth-suppressive signaling pathway. May play a role in developmental processes (By similarity). {ECO:0000250|UniProtKB:Q969K4}.	2.0	translation elongation factor activity [GO:0003746]
[1241]		Q810B6	1	1	0.9					128654	MOUSE	Ankyrin repeat and FYVE domain-containing protein 1					Q810B6	Q810B6	reviewed	ANFY1_MOUSE	Rabankyrin-5 (Rank-5) (Ankyrin repeat and FYVE domain-containing protein 1) (Ankyrin repeats hooked to a zinc finger motif)	Ankfy1 Ankhzn Kiaa1255	Mus musculus (Mouse)	1169	FUNCTION: Proposed effector of Rab5. Binds to phosphatidylinositol 3-phosphate (PI(3)P). Involved in homotypic early endosome fusion and to a lesser extent in heterotypic fusion of chlathrin-coated vesicles with early endosomes. Required for correct endosomal localization. Involved in the internalization and trafficking of activated tyrosine kinase receptors such as PDGFRB. Regulates the subcellu…	5.0	metal ion binding [GO:0046872]; phosphatidylinositol phosphate binding [GO:1901981]; small GTPase binding [GO:0031267]	endocytosis [GO:0006897]; endosomal transport [GO:0016197]; endosomal vesicle fusion [GO:0034058]; Golgi to lysosome transport [GO:0090160]; positive regulation of pinocytosis [GO:0048549]; retrograde transport, endosome to Golgi [GO:0042147]
[836]		Q8BH83	2	2	7.7					35513.1	MOUSE	Ankyrin repeat domain-containing protein 9					Q8BH83	Q8BH83	reviewed	ANKR9_MOUSE	Ankyrin repeat domain-containing protein 9	Ankrd9	Mus musculus (Mouse)	326	FUNCTION: Substrate receptor subunit of a cullin-RING superfamily E3 ligase complex (CUL5-based E3 ubiquitin ligase complex) which mediates the ubiquitination and subsequent proteasomal degradation of target proteins. Depending of the metabolic state of the cell, promotes the proteasomal degradation of IMPDH2, the rate-limiting enzyme in GTP biosynthesis or protects IMPDH2 by stabilizing IMPDH2 f…	3.0	hydrolase activity [GO:0016787]; ubiquitin ligase-substrate adaptor activity [GO:1990756]	intracellular copper ion homeostasis [GO:0006878]; proteasome-mediated ubiquitin-dependent protein catabolic process [GO:0043161]; protein ubiquitination [GO:0016567]
[307]		P97384	9	9	21.1					54079.8	MOUSE	Annexin A11					P97384	P97384	reviewed	ANX11_MOUSE	Annexin A11 (Annexin XI) (Annexin-11) (Calcyclin-associated annexin 50) (CAP-50)	Anxa11 Anx11	Mus musculus (Mouse)	503	FUNCTION: Required for midbody formation and completion of the terminal phase of cytokinesis (By similarity). Binds specifically to calcyclin in a calcium-dependent manner. {ECO:0000250}.	5.0	calcium ion binding [GO:0005509]; calcium-dependent phospholipid binding [GO:0005544]; calcium-dependent protein binding [GO:0048306]; phosphatidylethanolamine binding [GO:0008429]; S100 protein binding [GO:0044548]	cytokinetic process [GO:0032506]; phagocytosis [GO:0006909]; response to calcium ion [GO:0051592]
[1272]		P07356				1	1	0	3.2	38676.5	MOUSE	Annexin A2					P07356	P07356	reviewed	ANXA2_MOUSE	Annexin A2 (Annexin II) (Annexin-2) (Calpactin I heavy chain) (Calpactin-1 heavy chain) (Chromobindin-8) (Lipocortin II) (Placental anticoagulant protein IV) (PAP-IV) (Protein I) (p36)	Anxa2 Anx2 Cal1h	Mus musculus (Mouse)	339	FUNCTION: Calcium-regulated membrane-binding protein whose affinity for calcium is greatly enhanced by anionic phospholipids. It binds two calcium ions with high affinity. May be involved in heat-stress response (By similarity). Inhibits PCSK9-enhanced LDLR degradation, probably reduces PCSK9 protein levels via a translational mechanism but also competes with LDLR for binding with PCSK9 (PubMed:2…	5.0	bone sialoprotein binding [GO:0044730]; calcium channel activity [GO:0005262]; calcium ion binding [GO:0005509]; calcium-dependent phospholipid binding [GO:0005544]; calcium-dependent protein binding [GO:0048306]; cytoskeletal protein binding [GO:0008092]; identical protein binding [GO:0042802]; phosphatidylinositol-4,5-bisphosphate binding [GO:0005546]; phosphatidylserine binding [GO:0001786]; p…	angiogenesis [GO:0001525]; body fluid secretion [GO:0007589]; collagen fibril organization [GO:0030199]; fibrinolysis [GO:0042730]; membrane raft assembly [GO:0001765]; mRNA transcription by RNA polymerase II [GO:0042789]; negative regulation of low-density lipoprotein particle receptor catabolic process [GO:0032804]; negative regulation of receptor internalization [GO:0002091]; osteoclast develo…
[231]		Q07076	11	13	31.3	6	8	0.707198	13.8	49925.7	MOUSE	Annexin A7					Q07076	Q07076	reviewed	ANXA7_MOUSE	Annexin A7 (Annexin VII) (Annexin-7) (Synexin)	Anxa7 Anx7	Mus musculus (Mouse)	463	FUNCTION: Calcium/phospholipid-binding protein which promotes membrane fusion and is involved in exocytosis.	5.0	calcium ion binding [GO:0005509]; calcium-dependent phospholipid binding [GO:0005544]; calcium-dependent protein binding [GO:0048306]; integrin binding [GO:0005178]	autophagy [GO:0006914]; establishment of localization in cell [GO:0051649]; glial cell proliferation [GO:0014009]; hemostasis [GO:0007599]; insulin secretion [GO:0030073]; intracellular calcium ion homeostasis [GO:0006874]; intracellular water homeostasis [GO:0009992]; ion channel modulating, G protein-coupled receptor signaling pathway [GO:0099105]; ligand-gated ion channel signaling pathway [GO…
[437-1]	3	O35643	5	6	8.8	4	4	0.652798	4.2	103936	MOUSE	AP-1 complex subunit beta-1					O35643	O35643	reviewed	AP1B1_MOUSE	AP-1 complex subunit beta-1 (Adaptor protein complex AP-1 subunit beta-1) (Adaptor-related protein complex 1 subunit beta-1) (Beta-1-adaptin) (Beta-adaptin 1) (Clathrin assembly protein complex 1 beta large chain) (Golgi adaptor HA1/AP1 adaptin beta subunit)	Ap1b1 Adtb1	Mus musculus (Mouse)	943	FUNCTION: Subunit of clathrin-associated adaptor protein complex 1 that plays a role in protein sorting in the late-Golgi/trans-Golgi network (TGN) and/or endosomes. The AP complexes mediate both the recruitment of clathrin to membranes and the recognition of sorting signals within the cytosolic tails of transmembrane cargo molecules.	5.0	clathrin binding [GO:0030276]; protein kinase binding [GO:0019901]; protein serine/threonine kinase binding [GO:0120283]	basolateral protein secretion [GO:0110010]; clathrin coat assembly [GO:0048268]; determination of left/right symmetry [GO:0007368]; heart development [GO:0007507]; intracellular protein transport [GO:0006886]; kidney development [GO:0001822]; melanosome assembly [GO:1903232]; platelet dense granule organization [GO:0060155]; vesicle-mediated transport [GO:0016192]
[1296]		P22892	1	2	2.9					91351.3	MOUSE	AP-1 complex subunit gamma-1					P22892	P22892	reviewed	AP1G1_MOUSE	AP-1 complex subunit gamma-1 (Adaptor protein complex AP-1 subunit gamma-1) (Adaptor-related protein complex 1 subunit gamma-1) (Clathrin assembly protein complex 1 gamma-1 large chain) (Gamma-adaptin) (Gamma1-adaptin) (Golgi adaptor HA1/AP1 adaptin subunit gamma-1)	Ap1g1 Adtg Clapg1	Mus musculus (Mouse)	822	FUNCTION: Subunit of clathrin-associated adaptor protein complex 1 that plays a role in protein sorting in the late-Golgi/trans-Golgi network (TGN) and/or endosomes. The AP complexes mediate both the recruitment of clathrin to membranes and the recognition of sorting signals within the cytosolic tails of transmembrane cargo molecules. In association with AFTPH/aftiphilin in the aftiphilin/p200/ga…	5.0	clathrin adaptor activity [GO:0035615]; GTP-dependent protein binding [GO:0030742]; kinesin binding [GO:0019894]; small GTPase binding [GO:0031267]	basolateral protein secretion [GO:0110010]; endosome to melanosome transport [GO:0035646]; Golgi to lysosome transport [GO:0090160]; Golgi to vacuole transport [GO:0006896]; intracellular protein transport [GO:0006886]; melanosome assembly [GO:1903232]; platelet dense granule organization [GO:0060155]; positive regulation of natural killer cell degranulation [GO:0043323]; positive regulation of n…
[752]		P17426	2	2	2.8	2	2	0.435199	1.8	107665	MOUSE	AP-2 complex subunit alpha-1					P17426	P17426	reviewed	AP2A1_MOUSE	AP-2 complex subunit alpha-1 (100 kDa coated vesicle protein A) (Adaptor protein complex AP-2 subunit alpha-1) (Adaptor-related protein complex 2 subunit alpha-1) (Alpha-adaptin A) (Alpha1-adaptin) (Clathrin assembly protein complex 2 alpha-A large chain) (Plasma membrane adaptor HA2/AP2 adaptin alpha A subunit)	Ap2a1 Adtaa Clapa1	Mus musculus (Mouse)	977	FUNCTION: Component of the adaptor protein complex 2 (AP-2). Adaptor protein complexes function in protein transport via transport vesicles in different membrane traffic pathways. Adaptor protein complexes are vesicle coat components and appear to be involved in cargo selection and vesicle formation. AP-2 is involved in clathrin-dependent endocytosis in which cargo proteins are incorporated into …	5.0	clathrin adaptor activity [GO:0035615]; low-density lipoprotein particle receptor binding [GO:0050750]; protein kinase binding [GO:0019901]; protein-containing complex binding [GO:0044877]	clathrin-dependent endocytosis [GO:0072583]; intracellular protein transport [GO:0006886]; negative regulation of hyaluronan biosynthetic process [GO:1900126]; positive regulation of neuron projection development [GO:0010976]; positive regulation of receptor-mediated endocytosis [GO:0048260]; postsynaptic neurotransmitter receptor internalization [GO:0098884]; vesicle-mediated transport [GO:00161…
[437]		Q9DBG3	6	7	8.2	3	3	1.01546	3.2	104584	MOUSE	AP-2 complex subunit beta					Q9DBG3	Q9DBG3	reviewed	AP2B1_MOUSE	AP-2 complex subunit beta (AP105B) (Adaptor protein complex AP-2 subunit beta) (Adaptor-related protein complex 2 subunit beta) (Beta-2-adaptin) (Beta-adaptin) (Clathrin assembly protein complex 2 beta large chain) (Plasma membrane adaptor HA2/AP2 adaptin beta subunit)	Ap2b1 Clapb1	Mus musculus (Mouse)	937	FUNCTION: Component of the adaptor protein complex 2 (AP-2). Adaptor protein complexes function in protein transport via transport vesicles in different membrane traffic pathways. Adaptor protein complexes are vesicle coat components and appear to be involved in cargo selection and vesicle formation. AP-2 is involved in clathrin-dependent endocytosis in which cargo proteins are incorporated into …	5.0	clathrin binding [GO:0030276]; protein-containing complex binding [GO:0044877]	aorta development [GO:0035904]; cardiac septum development [GO:0003279]; clathrin coat assembly [GO:0048268]; clathrin-dependent endocytosis [GO:0072583]; coronary vasculature development [GO:0060976]; heart development [GO:0007507]; intracellular protein transport [GO:0006886]; kidney development [GO:0001822]; negative regulation of neuron death [GO:1901215]; neurotransmitter receptor internaliz…
[1192]		P84091	1	1	4.6					49655.1	MOUSE	AP-2 complex subunit mu					P84091	P84091	reviewed	AP2M1_MOUSE	AP-2 complex subunit mu (AP-2 mu chain) (Adaptor protein complex AP-2 subunit mu) (Adaptor-related protein complex 2 subunit mu) (Clathrin assembly protein complex 2 mu medium chain) (Clathrin coat assembly protein AP50) (Clathrin coat-associated protein AP50) (Mu2-adaptin) (Plasma membrane adaptor AP-2 50 kDa protein)	Ap2m1 Clapm1	Mus musculus (Mouse)	435	FUNCTION: Component of the adaptor protein complex 2 (AP-2) (PubMed:14745134, PubMed:15473838). Adaptor protein complexes function in protein transport via transport vesicles in different membrane traffic pathways (PubMed:14745134, PubMed:15473838). Adaptor protein complexes are vesicle coat components and appear to be involved in cargo selection and vesicle formation (PubMed:14745134, PubMed:154…	5.0	clathrin adaptor activity [GO:0035615]; disordered domain specific binding [GO:0097718]; lipid binding [GO:0008289]; low-density lipoprotein particle receptor binding [GO:0050750]; signal sequence binding [GO:0005048]; transmembrane transporter binding [GO:0044325]	clathrin-dependent endocytosis [GO:0072583]; intracellular protein transport [GO:0006886]; negative regulation of protein localization to plasma membrane [GO:1903077]; positive regulation of receptor internalization [GO:0002092]; positive regulation of synaptic vesicle endocytosis [GO:1900244]; postsynaptic neurotransmitter receptor internalization [GO:0098884]; protein-containing complex assembl…
[442]		O35841				11	20	0	20.6	56785.7	MOUSE	Apoptosis inhibitor 5					O35841	O35841	reviewed	API5_MOUSE	Apoptosis inhibitor 5 (API-5) (AAC-11)	Api5	Mus musculus (Mouse)	504	FUNCTION: Antiapoptotic factor that may have a role in protein assembly. Negatively regulates ACIN1. By binding to ACIN1, it suppresses ACIN1 cleavage from CASP3 and ACIN1-mediated DNA fragmentation. Also known to efficiently suppress E2F1-induced apoptosis (By similarity). {ECO:0000250}.	4.0	fibroblast growth factor binding [GO:0017134]; RNA binding [GO:0003723]	fibroblast apoptotic process [GO:0044346]; localization [GO:0051179]; negative regulation of apoptotic process [GO:0043066]; negative regulation of fibroblast apoptotic process [GO:2000270]
[357]		Q07813	9	11	44.8					21394.8	MOUSE	Apoptosis regulator BAX					Q07813	Q07813	reviewed	BAX_MOUSE	Apoptosis regulator BAX	Bax	Mus musculus (Mouse)	192	FUNCTION: Accelerates programmed cell death by binding to, and antagonizing the apoptosis repressor BCL2 or its adenovirus homolog E1B 19k protein. Under stress conditions, undergoes a conformation change that causes translocation to the mitochondrion membrane, leading to the release of cytochrome c that then triggers apoptosis. Promotes activation of CASP3, and thereby apoptosis. BAX deficiency …	5.0	BH domain binding [GO:0051400]; BH3 domain binding [GO:0051434]; channel activity [GO:0015267]; heat shock protein binding [GO:0031072]; Hsp70 protein binding [GO:0030544]; identical protein binding [GO:0042802]; lipid binding [GO:0008289]; protein heterodimerization activity [GO:0046982]; protein homodimerization activity [GO:0042803]; protein-containing complex binding [GO:0044877]; protein-fol…	activation of cysteine-type endopeptidase activity involved in apoptotic process [GO:0006919]; activation of cysteine-type endopeptidase activity involved in apoptotic process by cytochrome c [GO:0008635]; activation of cysteine-type endopeptidase activity involved in apoptotic signaling pathway [GO:0097296]; apoptotic mitochondrial changes [GO:0008637]; apoptotic process [GO:0006915]; apoptotic …
[272]		Q9Z0X1	12	14	23.7					66766.1	MOUSE	Apoptosis-inducing factor 1, mitochondrial					Q9Z0X1	Q9Z0X1	reviewed	AIFM1_MOUSE	Apoptosis-inducing factor 1, mitochondrial (EC 1.6.99.-) (Programmed cell death protein 8)	Aifm1 Aif Pdcd8	Mus musculus (Mouse)	612	FUNCTION: Functions both as NADH oxidoreductase and as regulator of apoptosis (By similarity). In response to apoptotic stimuli, it is released from the mitochondrion intermembrane space into the cytosol and to the nucleus, where it functions as a proapoptotic factor in a caspase-independent pathway (PubMed:9989411, PubMed:12114629, PubMed:21467298). Release into the cytoplasm is mediated upon bi…	5.0	DNA binding [GO:0003677]; electron-transferring-flavoprotein dehydrogenase activity [GO:0004174]; FAD binding [GO:0071949]; NAD(P)H oxidase H2O2-forming activity [GO:0016174]; NADH dehydrogenase activity [GO:0003954]; oxidoreductase activity, acting on NAD(P)H [GO:0016651]; poly-ADP-D-ribose binding [GO:0072572]; protein dimerization activity [GO:0046983]	activation of cysteine-type endopeptidase activity involved in apoptotic process [GO:0006919]; apoptotic mitochondrial changes [GO:0008637]; apoptotic process [GO:0006915]; cellular response to aldosterone [GO:1904045]; cellular response to estradiol stimulus [GO:0071392]; cellular response to hydrogen peroxide [GO:0070301]; cellular response to nitric oxide [GO:0071732]; cellular response to oxy…
[911]		Q8BUE4	2	2	10.5					40635.3	MOUSE	Apoptosis-inducing factor 2					Q8BUE4	Q8BUE4	reviewed	FSP1_MOUSE	Ferroptosis suppressor protein 1 (FSP1) (EC 1.6.5.-) (Apoptosis-inducing factor homologous mitochondrion-associated inducer of death) (AMID) (p53-responsive gene 3 protein)	Aifm2 Amid	Mus musculus (Mouse)	373	FUNCTION: A NAD(P)H-dependent oxidoreductase that acts as a key inhibitor of ferroptosis (By similarity). At the plasma membrane, catalyzes reduction of coenzyme Q/ubiquinone-10 to ubiquinol-10, a lipophilic radical-trapping antioxidant that prevents lipid oxidative damage and consequently ferroptosis (By similarity). Acts in parallel to GPX4 to suppress phospholipid peroxidation and ferroptosis …	5.0	DNA binding [GO:0003677]; electron-transferring-flavoprotein dehydrogenase activity [GO:0004174]; flavin adenine dinucleotide binding [GO:0050660]; oxidoreductase activity, acting on NAD(P)H, quinone or similar compound as acceptor [GO:0016655]	apoptotic mitochondrial changes [GO:0008637]; cellular detoxification [GO:1990748]; negative regulation of ferroptosis [GO:0110076]; positive regulation of apoptotic process [GO:0043065]; regulation of cellular response to oxidative stress [GO:1900407]; ubiquinone metabolic process [GO:0006743]; vitamin K metabolic process [GO:0042373]
[131]		Q9D0I9	20	25	36.2	1	1	10.88	3	75674.2	MOUSE	Arginine--tRNA ligase, cytoplasmic					Q9D0I9	Q9D0I9	reviewed	SYRC_MOUSE	Arginine--tRNA ligase, cytoplasmic (EC 6.1.1.19) (Arginyl-tRNA synthetase) (ArgRS)	Rars1 Rars	Mus musculus (Mouse)	660	FUNCTION: Forms part of a macromolecular complex that catalyzes the attachment of specific amino acids to cognate tRNAs during protein synthesis (PubMed:12060739). Modulates the secretion of AIMP1 and may be involved in generation of the inflammatory cytokine EMAP2 from AIMP1. {ECO:0000250|UniProtKB:P54136, ECO:0000269|PubMed:12060739}.	5.0	arginine binding [GO:0034618]; arginine-tRNA ligase activity [GO:0004814]; ATP binding [GO:0005524]; tRNA binding [GO:0000049]	arginyl-tRNA aminoacylation [GO:0006420]
[80]		P16460	30	45	77.2					46584.9	MOUSE	Argininosuccinate synthase					P16460	P16460	reviewed	ASSY_MOUSE	Argininosuccinate synthase (EC 6.3.4.5) (Citrulline--aspartate ligase)	Ass1 Ass	Mus musculus (Mouse)	412	FUNCTION: One of the enzymes of the urea cycle, the metabolic pathway transforming neurotoxic amonia produced by protein catabolism into inocuous urea in the liver of ureotelic animals. Catalyzes the formation of arginosuccinate from aspartate, citrulline and ATP and together with ASL it is responsible for the biosynthesis of arginine in most body tissues. {ECO:0000250|UniProtKB:P00966}.	5.0	amino acid binding [GO:0016597]; argininosuccinate synthase activity [GO:0004055]; ATP binding [GO:0005524]; identical protein binding [GO:0042802]; toxic substance binding [GO:0015643]	acute-phase response [GO:0006953]; aging [GO:0007568]; arginine biosynthetic process [GO:0006526]; argininosuccinate metabolic process [GO:0000053]; aspartate metabolic process [GO:0006531]; cellular response to amine stimulus [GO:0071418]; cellular response to amino acid stimulus [GO:0071230]; cellular response to ammonium ion [GO:0071242]; cellular response to cAMP [GO:0071320]; cellular respon…
[830]		Q9Z2A5	3	3	8.3					59146.9	MOUSE	Arginyl-tRNA--protein transferase 1					Q9Z2A5	Q9Z2A5	reviewed	ATE1_MOUSE	Arginyl-tRNA--protein transferase 1 (Arginyltransferase 1) (R-transferase 1) (EC 2.3.2.8) (Arginine-tRNA--protein transferase 1)	Ate1	Mus musculus (Mouse)	516	FUNCTION: Involved in the post-translational conjugation of arginine to the N-terminal aspartate or glutamate of a protein. This arginylation is required for degradation of the protein via the ubiquitin pathway. Does not arginylate cysteine residues. {ECO:0000269|PubMed:9858543}.	5.0	arginyltransferase activity [GO:0004057]	proteasomal protein catabolic process [GO:0010498]; protein arginylation [GO:0016598]
[837]		Q9D7A8	2	3	17					31246.8	MOUSE	Armadillo repeat-containing protein 1					Q9D7A8	Q9D7A8	reviewed	ARMC1_MOUSE	Armadillo repeat-containing protein 1	Armc1	Mus musculus (Mouse)	282	FUNCTION: In association with mitochondrial contact site and cristae organizing system (MICOS) complex components and mitochondrial outer membrane sorting assembly machinery (SAM) complex components may regulate mitochondrial dynamics playing a role in determining mitochondrial length, distribution and motility. {ECO:0000250|UniProtKB:Q9NVT9}.	3.0	metal ion binding [GO:0046872]	intracellular distribution of mitochondria [GO:0048312]
[1221]		Q8BNU0	1	1	4.7					50683.7	MOUSE	Armadillo repeat-containing protein 6					Q8BNU0	Q8BNU0	reviewed	ARMC6_MOUSE	Armadillo repeat-containing protein 6	Armc6	Mus musculus (Mouse)	468		2.0		hematopoietic progenitor cell differentiation [GO:0002244]
[464]		Q61024	9	9	17.8					64283.3	MOUSE	Asparagine synthetase [glutamine-hydrolyzing]					Q61024	Q61024	reviewed	ASNS_MOUSE	Asparagine synthetase [glutamine-hydrolyzing] (EC 6.3.5.4) (Glutamine-dependent asparagine synthetase)	Asns	Mus musculus (Mouse)	561		5.0	asparagine synthase (glutamine-hydrolyzing) activity [GO:0004066]; ATP binding [GO:0005524]; identical protein binding [GO:0042802]	asparagine biosynthetic process [GO:0006529]; cellular response to glucose starvation [GO:0042149]; cellular response to hormone stimulus [GO:0032870]; glutamine metabolic process [GO:0006541]; L-asparagine biosynthetic process [GO:0070981]; liver development [GO:0001889]; negative regulation of apoptotic process [GO:0043066]; positive regulation of mitotic cell cycle [GO:0045931]; response to am…
[189]		Q8BP47	14	20	32.6					64279.9	MOUSE	Asparagine--tRNA ligase, cytoplasmic					Q8BP47	Q8BP47	reviewed	SYNC_MOUSE	Asparagine--tRNA ligase, cytoplasmic (EC 6.1.1.22) (Asparaginyl-tRNA synthetase) (AsnRS) (Asparaginyl-tRNA synthetase 1)	NARS1 Nars	Mus musculus (Mouse)	559	FUNCTION: Catalyzes the attachment of asparagine to tRNA(Asn) in a two-step reaction: asparagine is first activated by ATP to form Asn-AMP and then transferred to the acceptor end of tRNA(Asn). In addition to its essential role in protein synthesis, acts as a signaling molecule that induced migration of CCR3-expressing cells. Has an essential role in the development of the cerebral cortex, being …	4.0	asparagine-tRNA ligase activity [GO:0004816]; ATP binding [GO:0005524]; CCR3 chemokine receptor binding [GO:0031728]; nucleic acid binding [GO:0003676]; protein dimerization activity [GO:0046983]	asparaginyl-tRNA aminoacylation [GO:0006421]; cell migration [GO:0016477]; cerebral cortex development [GO:0021987]
[104]		Q922B2	22	29	53.7					57147.7	MOUSE	Aspartate--tRNA ligase, cytoplasmic					Q922B2	Q922B2	reviewed	SYDC_MOUSE	Aspartate--tRNA ligase, cytoplasmic (EC 6.1.1.12) (Aspartyl-tRNA synthetase) (AspRS)	Dars1 Dars	Mus musculus (Mouse)	501	FUNCTION: Catalyzes the specific attachment of an amino acid to its cognate tRNA in a 2 step reaction: the amino acid (AA) is first activated by ATP to form AA-AMP and then transferred to the acceptor end of the tRNA. {ECO:0000250|UniProtKB:P15178}.	4.0	aspartate-tRNA ligase activity [GO:0004815]; ATP binding [GO:0005524]; RNA binding [GO:0003723]	aspartyl-tRNA aminoacylation [GO:0006422]
[554]		Q9Z2W0	5	6	15.2					52207.3	MOUSE	Aspartyl aminopeptidase					Q9Z2W0	Q9Z2W0	reviewed	DNPEP_MOUSE	Aspartyl aminopeptidase (EC 3.4.11.21)	Dnpep	Mus musculus (Mouse)	473	FUNCTION: Aminopeptidase with specificity towards an acidic amino acid at the N-terminus. Likely to play an important role in intracellular protein and peptide metabolism (By similarity). {ECO:0000250}.	3.0	aminopeptidase activity [GO:0004177]; identical protein binding [GO:0042802]; metallopeptidase activity [GO:0008237]; zinc ion binding [GO:0008270]	proteolysis [GO:0006508]
[119]		P28658	21	29	56.6	1	1	12.6208	2.3	53707.4	MOUSE	Ataxin-10					P28658	P28658	reviewed	ATX10_MOUSE	Ataxin-10 (Brain protein E46) (Spinocerebellar ataxia type 10 protein homolog)	Atxn10 Sca10	Mus musculus (Mouse)	475	FUNCTION: Necessary for the survival of cerebellar neurons. Induces neuritogenesis by activating the Ras-MAP kinase pathway. May play a role in the maintenance of a critical intracellular glycosylation level and homeostasis. {ECO:0000250}.	4.0	enzyme binding [GO:0019899]; identical protein binding [GO:0042802]	cilium assembly [GO:0060271]; nervous system development [GO:0007399]; neuron projection development [GO:0031175]
[1072]		O70305				1	1	0	1.3	136486	MOUSE	Ataxin-2					O70305	O70305	reviewed	ATX2_MOUSE	Ataxin-2 (Spinocerebellar ataxia type 2 protein homolog)	Atxn2 Atx2 Sca2	Mus musculus (Mouse)	1285	FUNCTION: Involved in EGFR trafficking, acting as negative regulator of endocytic EGFR internalization at the plasma membrane. {ECO:0000269|PubMed:18602463}.	5.0	epidermal growth factor receptor binding [GO:0005154]; mRNA binding [GO:0003729]	cerebellar Purkinje cell differentiation [GO:0021702]; homeostasis of number of cells [GO:0048872]; negative regulation of multicellular organism growth [GO:0040015]; negative regulation of receptor internalization [GO:0002091]; neuromuscular process [GO:0050905]; neuron projection morphogenesis [GO:0048812]; P-body assembly [GO:0033962]; stress granule assembly [GO:0034063]
[708]		Q7TQH0				4	7	0	4.1	110650	MOUSE	Ataxin-2-like protein					Q7TQH0	Q7TQH0	reviewed	ATX2L_MOUSE	Ataxin-2-like protein	Atxn2l A2lp	Mus musculus (Mouse)	1049	FUNCTION: Involved in the regulation of stress granule and P-body formation. {ECO:0000250|UniProtKB:Q8WWM7}.	4.0	mRNA binding [GO:0003729]	mRNA metabolic process [GO:0016071]; stress granule assembly [GO:0034063]
[354]		Q6PA06	7	9	13.9					66224.7	MOUSE	Atlastin-2					Q6PA06	Q6PA06	reviewed	ATLA2_MOUSE	Atlastin-2 (EC 3.6.5.-) (ADP-ribosylation factor-like protein 6-interacting protein 2) (ARL-6-interacting protein 2) (Aip-2)	Atl2 Arl6ip2	Mus musculus (Mouse)	583	FUNCTION: GTPase tethering membranes through formation of trans-homooligomers and mediating homotypic fusion of endoplasmic reticulum membranes. Functions in endoplasmic reticulum tubular network biogenesis. {ECO:0000250|UniProtKB:Q8NHH9}.	5.0	GTP binding [GO:0005525]; GTPase activity [GO:0003924]; identical protein binding [GO:0042802]	endoplasmic reticulum organization [GO:0007029]; endoplasmic reticulum tubular network membrane organization [GO:1990809]; Golgi organization [GO:0007030]; protein homooligomerization [GO:0051260]
[713]		Q91YH5	2	3	7.2					60575.6	MOUSE	Atlastin-3					Q91YH5	Q91YH5	reviewed	ATLA3_MOUSE	Atlastin-3 (EC 3.6.5.-)	Atl3	Mus musculus (Mouse)	541	FUNCTION: GTPase tethering membranes through formation of trans-homooligomers and mediating homotypic fusion of endoplasmic reticulum membranes. Functions in endoplasmic reticulum tubular network biogenesis (By similarity). {ECO:0000250|UniProtKB:Q6DD88}.	5.0	GTP binding [GO:0005525]; GTPase activity [GO:0003924]; identical protein binding [GO:0042802]	cellular response to type II interferon [GO:0071346]; endoplasmic reticulum organization [GO:0007029]; Golgi organization [GO:0007030]; positive regulation of endoplasmic reticulum tubular network organization [GO:1903373]; protein homooligomerization [GO:0051260]; response to bacterium [GO:0009617]
[904]		Q9CQQ7	2	2	9					28949.1	MOUSE	ATP synthase F(0) complex subunit B1, mitochondrial					Q9CQQ7	Q9CQQ7	reviewed	AT5F1_MOUSE	ATP synthase F(0) complex subunit B1, mitochondrial (ATP synthase peripheral stalk-membrane subunit b) (ATP synthase subunit b) (ATPase subunit b)	Atp5pb Atp5f1	Mus musculus (Mouse)	256	FUNCTION: Mitochondrial membrane ATP synthase (F(1)F(0) ATP synthase or Complex V) produces ATP from ADP in the presence of a proton gradient across the membrane which is generated by electron transport complexes of the respiratory chain. F-type ATPases consist of two structural domains, F(1) - containing the extramembraneous catalytic core, and F(0) - containing the membrane proton channel, link…	4.0	ATP hydrolysis activity [GO:0016887]; protein-containing complex binding [GO:0044877]; proton-transporting ATP synthase activity, rotational mechanism [GO:0046933]	ATP metabolic process [GO:0046034]; proton motive force-driven ATP synthesis [GO:0015986]; proton motive force-driven mitochondrial ATP synthesis [GO:0042776]
[47]		Q03265	27	37	54.2	20	24	0.670932	33.6	59753.1	MOUSE	ATP synthase subunit alpha, mitochondrial					Q03265	Q03265	reviewed	ATPA_MOUSE	ATP synthase subunit alpha, mitochondrial (ATP synthase F1 subunit alpha)	Atp5f1a Atp5a1	Mus musculus (Mouse)	553	FUNCTION: Mitochondrial membrane ATP synthase (F(1)F(0) ATP synthase or Complex V) produces ATP from ADP in the presence of a proton gradient across the membrane which is generated by electron transport complexes of the respiratory chain. F-type ATPases consist of two structural domains, F(1) - containing the extramembraneous catalytic core, and F(0) - containing the membrane proton channel, link…	5.0	ADP binding [GO:0043531]; angiostatin binding [GO:0043532]; ATP binding [GO:0005524]; ATP hydrolysis activity [GO:0016887]; MHC class I protein binding [GO:0042288]; protease binding [GO:0002020]; proton-transporting ATP synthase activity, rotational mechanism [GO:0046933]	aging [GO:0007568]; apoptotic process [GO:0006915]; ATP biosynthetic process [GO:0006754]; ATP metabolic process [GO:0046034]; cellular response to dexamethasone stimulus [GO:0071549]; cellular response to nitric oxide [GO:0071732]; lipid metabolic process [GO:0006629]; negative regulation of endothelial cell proliferation [GO:0001937]; positive regulation of blood vessel endothelial cell migrati…
[42]		P56480	29	71	75.4	10	11	2.80901	23.8	56301	MOUSE	ATP synthase subunit beta, mitochondrial					P56480	P56480	reviewed	ATPB_MOUSE	ATP synthase subunit beta, mitochondrial (EC 7.1.2.2) (ATP synthase F1 subunit beta)	Atp5f1b Atp5b	Mus musculus (Mouse)	529	FUNCTION: Mitochondrial membrane ATP synthase (F(1)F(0) ATP synthase or Complex V) produces ATP from ADP in the presence of a proton gradient across the membrane which is generated by electron transport complexes of the respiratory chain. F-type ATPases consist of two structural domains, F(1) - containing the extramembraneous catalytic core, and F(0) - containing the membrane proton channel, link…	5.0	ADP binding [GO:0043531]; angiostatin binding [GO:0043532]; ATP binding [GO:0005524]; ATP hydrolysis activity [GO:0016887]; calcium ion binding [GO:0005509]; lipoprotein particle receptor activity [GO:0030228]; MHC class I protein binding [GO:0042288]; proton-transporting ATP synthase activity, rotational mechanism [GO:0046933]; proton-transporting ATPase activity, rotational mechanism [GO:004696…	angiogenesis [GO:0001525]; ATP biosynthetic process [GO:0006754]; ATP metabolic process [GO:0046034]; cellular response to interleukin-7 [GO:0098761]; lipid metabolic process [GO:0006629]; negative regulation of cell adhesion involved in substrate-bound cell migration [GO:0006933]; positive regulation of blood vessel endothelial cell migration [GO:0043536]; proton motive force-driven mitochondria…
[684]		Q9DCX2	3	3	33.5					18749.6	MOUSE	ATP synthase subunit d, mitochondrial					Q9DCX2	Q9DCX2	reviewed	ATP5H_MOUSE	ATP synthase subunit d, mitochondrial (ATPase subunit d) (ATP synthase peripheral stalk subunit d)	Atp5pd Atp5h	Mus musculus (Mouse)	161	FUNCTION: Mitochondrial membrane ATP synthase (F(1)F(0) ATP synthase or Complex V) produces ATP from ADP in the presence of a proton gradient across the membrane which is generated by electron transport complexes of the respiratory chain. F-type ATPases consist of two structural domains, F(1) - containing the extramembraneous catalytic core, and F(0) - containing the membrane proton channel, link…	4.0	protein-containing complex binding [GO:0044877]; proton-transporting ATP synthase activity, rotational mechanism [GO:0046933]	ATP metabolic process [GO:0046034]; proton motive force-driven ATP synthesis [GO:0015986]; proton motive force-driven mitochondrial ATP synthesis [GO:0042776]
[1290]		P56135				1	1	0	13.6	10344.3	MOUSE	ATP synthase subunit f, mitochondrial					P56135	P56135	reviewed	ATPK_MOUSE	ATP synthase subunit f, mitochondrial (ATP synthase membrane subunit f)	Atp5mf Atp5j2	Mus musculus (Mouse)	88	FUNCTION: Mitochondrial membrane ATP synthase (F(1)F(0) ATP synthase or Complex V) produces ATP from ADP in the presence of a proton gradient across the membrane which is generated by electron transport complexes of the respiratory chain. F-type ATPases consist of two structural domains, F(1) - containing the extramembraneous catalytic core and F(0) - containing the membrane proton channel, linke…	4.0	proton-transporting ATP synthase activity, rotational mechanism [GO:0046933]	ATP metabolic process [GO:0046034]; proton motive force-driven mitochondrial ATP synthesis [GO:0042776]
[664]		Q91VR2	5	5	19.8	4	4	0.543999	13.4	32886.2	MOUSE	ATP synthase subunit gamma, mitochondrial					Q91VR2	Q91VR2	reviewed	ATPG_MOUSE	ATP synthase subunit gamma, mitochondrial (ATP synthase F1 subunit gamma) (F-ATPase gamma subunit)	Atp5f1c Atp5c1	Mus musculus (Mouse)	298	FUNCTION: Mitochondrial membrane ATP synthase (F(1)F(0) ATP synthase or Complex V) produces ATP from ADP in the presence of a proton gradient across the membrane which is generated by electron transport complexes of the respiratory chain. F-type ATPases consist of two structural domains, F(1) - containing the extramembraneous catalytic core, and F(0) - containing the membrane proton channel, link…	4.0	ATP hydrolysis activity [GO:0016887]; proton-transporting ATP synthase activity, rotational mechanism [GO:0046933]	ATP metabolic process [GO:0046034]; proton motive force-driven ATP synthesis [GO:0015986]; proton motive force-driven mitochondrial ATP synthesis [GO:0042776]
[903]		Q9DB20	2	2	14.1	1	1	0.870398	5.2	23363.8	MOUSE	ATP synthase subunit O, mitochondrial					Q9DB20	Q9DB20	reviewed	ATPO_MOUSE	ATP synthase subunit O, mitochondrial (ATP synthase peripheral stalk subunit OSCP) (Oligomycin sensitivity conferral protein) (OSCP)	Atp5po Atp5o D12Wsu28e	Mus musculus (Mouse)	213	FUNCTION: Mitochondrial membrane ATP synthase (F(1)F(0) ATP synthase or Complex V) produces ATP from ADP in the presence of a proton gradient across the membrane which is generated by electron transport complexes of the respiratory chain. F-type ATPases consist of two structural domains, F(1) - containing the extramembraneous catalytic core and F(0) - containing the membrane proton channel, linke…	5.0	ATP hydrolysis activity [GO:0016887]; estradiol binding [GO:1903924]; protein-containing complex binding [GO:0044877]; proton-transporting ATP synthase activity, rotational mechanism [GO:0046933]	ATP biosynthetic process [GO:0006754]; ATP metabolic process [GO:0046034]; proton motive force-driven mitochondrial ATP synthesis [GO:0042776]
[353]		O54984	9	10	33					38823.2	MOUSE	ATPase Asna1					O54984	O54984	reviewed	GET3_MOUSE	ATPase GET3 (EC 3.6.-.-) (Arsenical pump-driving ATPase) (Arsenite-stimulated ATPase) (Guided entry of tail-anchored proteins factor 3, ATPase)	Get3 Arsa Asna1	Mus musculus (Mouse)	348	FUNCTION: ATPase required for the post-translational delivery of tail-anchored (TA) proteins to the endoplasmic reticulum. Recognizes and selectively binds the transmembrane domain of TA proteins in the cytosol. This complex then targets to the endoplasmic reticulum by membrane-bound receptors GET1/WRB and CAMLG/GET2, where the tail-anchored protein is released for insertion. This process is regu…	4.0	ATP binding [GO:0005524]; ATP hydrolysis activity [GO:0016887]; membrane insertase activity [GO:0032977]; metal ion binding [GO:0046872]	post-translational protein targeting to endoplasmic reticulum membrane [GO:0006620]; tail-anchored membrane protein insertion into ER membrane [GO:0071816]
[732]		Q9D5T0	4	5	12.5					40744.4	MOUSE	ATPase family AAA domain-containing protein 1					Q9D5T0	Q9D5T0	reviewed	ATAD1_MOUSE	Outer mitochondrial transmembrane helix translocase (EC 7.4.2.-) (ATPase family AAA domain-containing protein 1) (Thorase)	Atad1	Mus musculus (Mouse)	361	FUNCTION: Outer mitochondrial translocase required to remove mislocalized tail-anchored transmembrane proteins on mitochondria (By similarity). Specifically recognizes and binds tail-anchored transmembrane proteins: acts as a dislocase that mediates the ATP-dependent extraction of mistargeted tail-anchored transmembrane proteins from the mitochondrion outer membrane (By similarity). Also plays a …	5.0	ATP binding [GO:0005524]; ATP hydrolysis activity [GO:0016887]; membrane protein dislocase activity [GO:0140567]	extraction of mislocalized protein from mitochondrial outer membrane [GO:0140570]; learning [GO:0007612]; memory [GO:0007613]; negative regulation of synaptic transmission, glutamatergic [GO:0051967]; positive regulation of receptor internalization [GO:0002092]; regulation of postsynaptic neurotransmitter receptor internalization [GO:0099149]
[1225]		Q925I1	2	2	4.9					66742.5	MOUSE	ATPase family AAA domain-containing protein 3					Q925I1	Q925I1	reviewed	ATAD3_MOUSE	ATPase family AAA domain-containing protein 3 (AAA-ATPase TOB3)	Atad3 Atad3a Kiaa1273	Mus musculus (Mouse)	591	FUNCTION: Essential for mitochondrial network organization, mitochondrial metabolism and cell growth at organism and cellular level. May play an important role in mitochondrial protein synthesis. May also participate in mitochondrial DNA replication. May bind to mitochondrial DNA D-loops and contribute to nucleoid stability. Required for enhanced channeling of cholesterol for hormone-dependent st…	5.0	ATP binding [GO:0005524]; ATP hydrolysis activity [GO:0016887]; identical protein binding [GO:0042802]	antiviral innate immune response [GO:0140374]; mitochondrion organization [GO:0007005]; negative regulation of apoptotic process [GO:0043066]; regulation of cell growth [GO:0001558]
[703]		Q91XU0	3	3	4.7					71794.4	MOUSE	ATPase WRNIP1					Q91XU0	Q91XU0	reviewed	WRIP1_MOUSE	ATPase WRNIP1 (EC 3.6.1.-) (Werner helicase-interacting protein 1)	Wrnip1 Whip	Mus musculus (Mouse)	660	FUNCTION: Functions as a modulator of initiation or reinitiation events during DNA polymerase delta-mediated DNA synthesis. In the presence of ATP, stimulation of DNA polymerase delta-mediated DNA synthesis is decreased. Also plays a role in the innate immune defense against viruses. Stabilizes the RIGI dsRNA interaction and promotes RIGI 'Lys-63'-linked polyubiquitination. In turn, RIGI transmit…	5.0	ATP binding [GO:0005524]; ATP hydrolysis activity [GO:0016887]; DNA binding [GO:0003677]; enzyme activator activity [GO:0008047]; identical protein binding [GO:0042802]; metal ion binding [GO:0046872]; single-stranded DNA helicase activity [GO:0017116]	DNA synthesis involved in DNA repair [GO:0000731]; DNA-templated DNA replication [GO:0006261]; innate immune response [GO:0045087]; regulation of DNA-templated DNA replication initiation [GO:0030174]
[1110]		P61222	1	1	2.5					67315	MOUSE	ATP-binding cassette sub-family E member 1					P61222	P61222	reviewed	ABCE1_MOUSE	ATP-binding cassette sub-family E member 1 (RNase L inhibitor) (EC 3.6.5.-) (Ribonuclease 4 inhibitor) (RNS4I)	Abce1 Rli	Mus musculus (Mouse)	599	FUNCTION: Nucleoside-triphosphatase (NTPase) involved in ribosome recycling by mediating ribosome disassembly (By similarity). Able to hydrolyze ATP, GTP, UTP and CTP (By similarity). Splits ribosomes into free 60S subunits and tRNA- and mRNA-bound 40S subunits (By similarity). Acts either after canonical termination facilitated by release factors (ETF1/eRF1) or after recognition of stalled and v…	5.0	4 iron, 4 sulfur cluster binding [GO:0051539]; ATP binding [GO:0005524]; ATP hydrolysis activity [GO:0016887]; CTPase activity [GO:0043273]; endoribonuclease inhibitor activity [GO:0060698]; GTPase activity [GO:0003924]; iron ion binding [GO:0005506]; ribosomal small subunit binding [GO:0043024]	negative regulation of endoribonuclease activity [GO:0060702]; regulation of translation [GO:0006417]; rescue of stalled ribosome [GO:0072344]; ribosomal subunit export from nucleus [GO:0000054]; ribosome disassembly [GO:0032790]; translational initiation [GO:0006413]; translational termination [GO:0006415]
[274]		Q6P542	1	1	3.7	10	10	0.0435199	12.5	94946.2	MOUSE	ATP-binding cassette sub-family F member 1					Q6P542	Q6P542	reviewed	ABCF1_MOUSE	ATP-binding cassette sub-family F member 1	Abcf1	Mus musculus (Mouse)	837	FUNCTION: Required for efficient Cap- and IRES-mediated mRNA translation initiation. Not involved in the ribosome biogenesis (By similarity). {ECO:0000250}.	4.0	ATP binding [GO:0005524]; ATP hydrolysis activity [GO:0016887]; ribosome binding [GO:0043022]; translation activator activity [GO:0008494]	positive regulation of translation [GO:0045727]; translational initiation [GO:0006413]
[634]		Q99LE6	5	6	9.9	1	1	2.61119	2.2	71782.4	MOUSE	ATP-binding cassette sub-family F member 2					Q99LE6	Q99LE6	reviewed	ABCF2_MOUSE	ATP-binding cassette sub-family F member 2	Abcf2	Mus musculus (Mouse)	628		2.0	ATP binding [GO:0005524]; ATP hydrolysis activity [GO:0016887]
[128]		Q91V92	20	25	26.5	7	7	1.55428	7	119729	MOUSE	ATP-citrate synthase					Q91V92	Q91V92	reviewed	ACLY_MOUSE	ATP-citrate synthase (EC 2.3.3.8) (ATP-citrate (pro-S-)-lyase) (Citrate cleavage enzyme)	Acly	Mus musculus (Mouse)	1091	FUNCTION: Catalyzes the cleavage of citrate into oxaloacetate and acetyl-CoA, the latter serving as common substrate for de novo cholesterol and fatty acid synthesis. {ECO:0000269|PubMed:25450640}.	5.0	ATP binding [GO:0005524]; ATP citrate synthase activity [GO:0003878]; metal ion binding [GO:0046872]	acetyl-CoA biosynthetic process [GO:0006085]; acetyl-CoA metabolic process [GO:0006084]; citrate metabolic process [GO:0006101]; fatty acid biosynthetic process [GO:0006633]; lipid biosynthetic process [GO:0008610]; oxaloacetate metabolic process [GO:0006107]; tricarboxylic acid cycle [GO:0006099]
[31]		O70133	41	92	32.6	13	14	2.85988	8.6	149476	MOUSE	ATP-dependent RNA helicase A					O70133	O70133	reviewed	DHX9_MOUSE	ATP-dependent RNA helicase A (EC 3.6.4.13) (DEAH box protein 9) (mHEL-5) (Nuclear DNA helicase II) (NDH II) (RNA helicase A) (RHA)	Dhx9 Ddx9	Mus musculus (Mouse)	1380	FUNCTION: Multifunctional ATP-dependent nucleic acid helicase that unwinds DNA and RNA in a 3' to 5' direction and that plays important roles in many processes, such as DNA replication, transcriptional activation, post-transcriptional RNA regulation, mRNA translation and RNA-mediated gene silencing. Requires a 3'-single-stranded tail as entry site for acid nuclei unwinding activities as well as t…	5.0	3'-5' DNA helicase activity [GO:0043138]; 3'-5' DNA/RNA helicase activity [GO:0033679]; 3'-5' RNA helicase activity [GO:0034458]; ATP binding [GO:0005524]; ATP hydrolysis activity [GO:0016887]; chromatin DNA binding [GO:0031490]; DNA binding [GO:0003677]; DNA helicase activity [GO:0003678]; DNA replication origin binding [GO:0003688]; double-stranded DNA binding [GO:0003690]; double-stranded RNA …	alternative mRNA splicing, via spliceosome [GO:0000380]; cellular response to exogenous dsRNA [GO:0071360]; cellular response to heat [GO:0034605]; cellular response to tumor necrosis factor [GO:0071356]; circadian rhythm [GO:0007623]; CRD-mediated mRNA stabilization [GO:0070934]; DNA duplex unwinding [GO:0032508]; DNA-templated transcription termination [GO:0006353]; DNA-templated viral transcri…
[154]		Q91VR5	9	9	17.7	19	22	0.178036	28.1	82500.9	MOUSE	ATP-dependent RNA helicase DDX1					Q91VR5	Q91VR5	reviewed	DDX1_MOUSE	ATP-dependent RNA helicase DDX1 (EC 3.6.4.13) (DEAD box protein 1)	Ddx1	Mus musculus (Mouse)	740	FUNCTION: Acts as an ATP-dependent RNA helicase, able to unwind both RNA-RNA and RNA-DNA duplexes. Possesses 5' single-stranded RNA overhang nuclease activity. Possesses ATPase activity on various RNA, but not DNA polynucleotides. May play a role in RNA clearance at DNA double-strand breaks (DSBs), thereby facilitating the template-guided repair of transcriptionally active regions of the genome. …	5.0	ATP binding [GO:0005524]; ATP hydrolysis activity [GO:0016887]; chromatin binding [GO:0003682]; DNA binding [GO:0003677]; DNA/RNA helicase activity [GO:0033677]; double-stranded RNA binding [GO:0003725]; exonuclease activity [GO:0004527]; nuclease activity [GO:0004518]; poly(A) binding [GO:0008143]; RNA helicase activity [GO:0003724]; transcription coregulator activity [GO:0003712]	defense response to virus [GO:0051607]; DNA duplex unwinding [GO:0032508]; double-strand break repair [GO:0006302]; innate immune response [GO:0045087]; mRNA processing [GO:0006397]; nucleic acid phosphodiester bond hydrolysis [GO:0090305]; positive regulation of I-kappaB kinase/NF-kappaB signaling [GO:0043123]; positive regulation of myeloid dendritic cell cytokine production [GO:0002735]; prote…
[1196]		Q8K363				1	1	0	1.8	74181.5	MOUSE	ATP-dependent RNA helicase DDX18					Q8K363	Q8K363	reviewed	DDX18_MOUSE	ATP-dependent RNA helicase DDX18 (EC 3.6.4.13) (DEAD box protein 18)	Ddx18	Mus musculus (Mouse)	660	FUNCTION: Probable RNA-dependent helicase.	4.0	ATP binding [GO:0005524]; ATP hydrolysis activity [GO:0016887]; RNA binding [GO:0003723]; RNA helicase activity [GO:0003724]	maturation of LSU-rRNA from tricistronic rRNA transcript (SSU-rRNA, 5.8S rRNA, LSU-rRNA) [GO:0000463]
[930]		Q8VDW0				3	3	0	6.3	49067.9	MOUSE	ATP-dependent RNA helicase DDX39A					Q8VDW0	Q8VDW0	reviewed	DX39A_MOUSE	ATP-dependent RNA helicase DDX39A (EC 3.6.4.13) (DEAD box protein 39)	Ddx39a Ddx39	Mus musculus (Mouse)	427	FUNCTION: Involved in pre-mRNA splicing. Required for the export of mRNA out of the nucleus (By similarity). {ECO:0000250}.	5.0	ATP binding [GO:0005524]; ATP hydrolysis activity [GO:0016887]; identical protein binding [GO:0042802]; RNA binding [GO:0003723]; RNA helicase activity [GO:0003724]	mRNA export from nucleus [GO:0006406]; mRNA splicing, via spliceosome [GO:0000398]
[19]		Q62167	40	89	66.5	13	15	2.58218	14.5	73102	MOUSE	ATP-dependent RNA helicase DDX3X					Q62167	Q62167	reviewed	DDX3X_MOUSE	ATP-dependent RNA helicase DDX3X (EC 3.6.4.13) (D1Pas1-related sequence 2) (DEAD box RNA helicase DEAD3) (mDEAD3) (DEAD box protein 3, X-chromosomal) (Embryonic RNA helicase)	Ddx3x D1Pas1-rs2 Ddx3 Dead3 Erh	Mus musculus (Mouse)	662	FUNCTION: Multifunctional ATP-dependent RNA helicase. The ATPase activity can be stimulated by various ribo-and deoxynucleic acids indicative for a relaxed substrate specificity. In vitro can unwind partially double-stranded DNA with a preference for 5'-single-stranded DNA overhangs. Binds RNA G-quadruplex (rG4s) structures, including those located in the 5'-UTR of NRAS mRNA. Involved in many cel…	5.0	ATP binding [GO:0005524]; ATP hydrolysis activity [GO:0016887]; CTPase activity [GO:0043273]; DNA binding [GO:0003677]; DNA helicase activity [GO:0003678]; eukaryotic initiation factor 4E binding [GO:0008190]; gamma-tubulin binding [GO:0043015]; GTPase activity [GO:0003924]; mRNA 5'-UTR binding [GO:0048027]; mRNA binding [GO:0003729]; poly(A) binding [GO:0008143]; primary miRNA binding [GO:007087…	cell differentiation [GO:0030154]; cellular response to arsenic-containing substance [GO:0071243]; cellular response to osmotic stress [GO:0071470]; cellular response to virus [GO:0098586]; chromosome segregation [GO:0007059]; cytosolic ribosome assembly [GO:0042256]; extrinsic apoptotic signaling pathway via death domain receptors [GO:0008625]; gamete generation [GO:0007276]; inflammatory respon…
[1323]		Q810A7				1	1	0	1.4	101966	MOUSE	ATP-dependent RNA helicase DDX42					Q810A7	Q810A7	reviewed	DDX42_MOUSE	ATP-dependent RNA helicase DDX42 (EC 3.6.4.13) (DEAD box protein 42)	Ddx42	Mus musculus (Mouse)	929	FUNCTION: ATP-dependent RNA helicase. Binds to partially double-stranded RNAs (dsRNAs) in order to unwind RNA secondary structures. Unwinding is promoted in the presence of single-strand binding proteins. Mediates also RNA duplex formation thereby displacing the single-strand RNA binding protein. ATP and ADP modulate its activity: ATP binding and hydrolysis by DDX42 triggers RNA strand separation…	5.0	ATP binding [GO:0005524]; ATP hydrolysis activity [GO:0016887]; RNA binding [GO:0003723]; RNA helicase activity [GO:0003724]	protein localization [GO:0008104]; regulation of apoptotic process [GO:0042981]
[705]		Q6PGC1	3	3	3.3					153977	MOUSE	ATP-dependent RNA helicase Dhx29					Q6PGC1	Q6PGC1	reviewed	DHX29_MOUSE	ATP-dependent RNA helicase DHX29 (EC 3.6.4.13) (DEAH box protein 29)	Dhx29	Mus musculus (Mouse)	1365	FUNCTION: ATP-binding RNA helicase involved in translation initiation. Part of the 43S pre-initiation complex that is required for efficient initiation on mRNAs of higher eukaryotes with structured 5'-UTRs by promoting efficient NTPase-dependent 48S complex formation. Specifically binds to the 40S ribosome near the mRNA entrance. Does not possess a processive helicase activity. {ECO:0000255|HAMAP…	5.0	ATP binding [GO:0005524]; ATP hydrolysis activity [GO:0016887]; helicase activity [GO:0004386]; ribonucleoside triphosphate phosphatase activity [GO:0017111]; ribosomal small subunit binding [GO:0043024]; RNA binding [GO:0003723]; RNA helicase activity [GO:0003724]; translation activator activity [GO:0008494]; translation initiation factor activity [GO:0003743]	formation of translation preinitiation complex [GO:0001731]; positive regulation of translational initiation [GO:0045948]; ribosome assembly [GO:0042255]
[190-1]	3	A2A4P0				4	4	0	3.4	142573	MOUSE	ATP-dependent RNA helicase DHX8					A2A4P0	A2A4P0	reviewed	DHX8_MOUSE	ATP-dependent RNA helicase DHX8 (EC 3.6.4.13) (DEAH box protein 8)	Dhx8	Mus musculus (Mouse)	1244	FUNCTION: Involved in pre-mRNA splicing as component of the spliceosome. Facilitates nuclear export of spliced mRNA by releasing the RNA from the spliceosome. {ECO:0000250|UniProtKB:Q14562}.	4.0	ATP binding [GO:0005524]; ATP hydrolysis activity [GO:0016887]; identical protein binding [GO:0042802]; RNA binding [GO:0003723]; RNA helicase activity [GO:0003724]	mRNA splicing, via spliceosome [GO:0000398]; spliceosomal complex disassembly [GO:0000390]
[776]		Q80YD1	3	3	4.5					87005.7	MOUSE	ATP-dependent RNA helicase SUPV3L1, mitochondrial					Q80YD1	Q80YD1	reviewed	SUV3_MOUSE	ATP-dependent RNA helicase SUPV3L1, mitochondrial (EC 3.6.4.13) (Suppressor of var1 3-like protein 1) (SUV3-like protein 1)	Supv3l1 Suv3l1	Mus musculus (Mouse)	779	FUNCTION: Major helicase player in mitochondrial RNA metabolism. Component of the mitochondrial degradosome (mtEXO) complex, that degrades 3' overhang double-stranded RNA with a 3'-to-5' directionality in an ATP-dependent manner. Involved in the degradation of non-coding mitochondrial transcripts (MT-ncRNA) and tRNA-like molecules (By similarity). ATPase and ATP-dependent multisubstrate helicase,…	5.0	3'-5' RNA helicase activity [GO:0034458]; ATP binding [GO:0005524]; ATP hydrolysis activity [GO:0016887]; DNA binding [GO:0003677]; DNA helicase activity [GO:0003678]; double-stranded RNA binding [GO:0003725]; identical protein binding [GO:0042802]; protein homodimerization activity [GO:0042803]; RNA helicase activity [GO:0003724]	DNA duplex unwinding [GO:0032508]; DNA recombination [GO:0006310]; mitochondrial mRNA catabolic process [GO:0000958]; mitochondrial mRNA surveillance [GO:0035946]; mitochondrial ncRNA surveillance [GO:0035945]; mitochondrial RNA 3'-end processing [GO:0000965]; mitochondrial RNA surveillance [GO:2000827]; mitochondrion morphogenesis [GO:0070584]; negative regulation of apoptotic process [GO:004306…
[747]		O88967	2	2	4.9					80028.7	MOUSE	ATP-dependent zinc metalloprotease YME1L1					O88967	O88967	reviewed	YMEL1_MOUSE	ATP-dependent zinc metalloprotease YME1L1 (EC 3.4.24.-) (ATP-dependent metalloprotease FtsH1) (YME1-like protein 1)	Yme1l1	Mus musculus (Mouse)	715	FUNCTION: ATP-dependent metalloprotease that catalyzes the degradation of folded and unfolded proteins with a suitable degron sequence in the mitochondrial intermembrane region (By similarity). Plays an important role in regulating mitochondrial morphology and function by cleaving OPA1 at position S2, giving rise to a form of OPA1 that promotes maintenance of normal mitochondrial structure (PubMe…	5.0	ATP binding [GO:0005524]; ATP hydrolysis activity [GO:0016887]; ATP-dependent peptidase activity [GO:0004176]; metal ion binding [GO:0046872]; metalloendopeptidase activity [GO:0004222]	cell population proliferation [GO:0008283]; mitochondrial protein catabolic process [GO:0035694]; mitochondrial protein processing [GO:0034982]; mitochondrion organization [GO:0007005]; negative regulation of apoptotic process [GO:0043066]; protein hexamerization [GO:0034214]; protein quality control for misfolded or incompletely synthesized proteins [GO:0006515]
[1294]		A2BH40	2	2	1.4					242094	MOUSE	AT-rich interactive domain-containing protein 1A					A2BH40	A2BH40	reviewed	ARI1A_MOUSE	AT-rich interactive domain-containing protein 1A (ARID domain-containing protein 1A) (BRG1-associated factor 250) (BAF250) (BRG1-associated factor 250a) (BAF250A) (Osa homolog 1) (SWI-like protein) (SWI/SNF complex protein p270) (SWI/SNF-related, matrix-associated, actin-dependent regulator of chromatin subfamily F member 1)	Arid1a Baf250 Baf250a Osa1 Smarcf1	Mus musculus (Mouse)	2283	FUNCTION: Involved in transcriptional activation and repression of select genes by chromatin remodeling (alteration of DNA-nucleosome topology). Component of SWI/SNF chromatin remodeling complexes that carry out key enzymatic activities, changing chromatin structure by altering DNA-histone contacts within a nucleosome in an ATP-dependent manner. Binds DNA non-specifically (PubMed:22952240, PubMed…	5.0	ATP-dependent chromatin remodeler activity [GO:0140658]; DNA binding [GO:0003677]; nuclear receptor binding [GO:0016922]; nucleosome binding [GO:0031491]	androgen receptor signaling pathway [GO:0030521]; cardiac chamber development [GO:0003205]; cardiac muscle cell differentiation [GO:0055007]; chromatin organization [GO:0006325]; chromatin remodeling [GO:0006338]; embryo implantation [GO:0007566]; forebrain development [GO:0030900]; formation of primary germ layer [GO:0001704]; gastrulation [GO:0007369]; glucocorticoid receptor signaling pathway …
[1320]		Q3U108	2	3	4.1					63899	MOUSE	AT-rich interactive domain-containing protein 5A					Q3U108	Q3U108	reviewed	ARI5A_MOUSE	AT-rich interactive domain-containing protein 5A (ARID domain-containing protein 5A)	Arid5a	Mus musculus (Mouse)	590	FUNCTION: DNA-binding protein that may regulate transcription and act as a repressor by binding to AT-rich stretches in the promoter region of target genes (By similarity). May positively regulate chondrocyte-specific transcription such as of COL2A1 in collaboration with SOX9 and positively regulate histone H3 acetylation at chondrocyte-specific genes. May stimulate early-stage chondrocyte differ…	5.0	chromatin binding [GO:0003682]; identical protein binding [GO:0042802]; nuclear androgen receptor binding [GO:0050681]; nuclear estrogen receptor binding [GO:0030331]; nuclear retinoid X receptor binding [GO:0046965]; nuclear thyroid hormone receptor binding [GO:0046966]; RNA stem-loop binding [GO:0035613]; sequence-specific DNA binding [GO:0043565]; transcription cis-regulatory region binding [G…	cellular response to estrogen stimulus [GO:0071391]; cellular response to lipopolysaccharide [GO:0071222]; chondrocyte differentiation [GO:0002062]; innate immune response [GO:0045087]; negative regulation of transcription by RNA polymerase II [GO:0000122]; positive regulation of interleukin-17 production [GO:0032740]; positive regulation of interleukin-6 production [GO:0032755]; positive regulat…
[822]		P97477	2	2	6.8					44772.4	MOUSE	Aurora kinase A					P97477	P97477	reviewed	AURKA_MOUSE	Aurora kinase A (EC 2.7.11.1) (Aurora 2) (Aurora/IPL1-related kinase 1) (ARK-1) (Aurora-related kinase 1) (Ipl1- and aurora-related kinase 1) (Serine/threonine-protein kinase 15) (Serine/threonine-protein kinase 6) (Serine/threonine-protein kinase Ayk1) (Serine/threonine-protein kinase aurora-A)	Aurka Aik Airk1 Ark1 Aura Ayk1 Btak Iak1 Stk15 Stk6	Mus musculus (Mouse)	395	FUNCTION: Mitotic serine/threonine kinase that contributes to the regulation of cell cycle progression (By similarity). Associates with the centrosome and the spindle microtubules during mitosis and plays a critical role in various mitotic events including the establishment of mitotic spindle, centrosome duplication, centrosome separation as well as maturation, chromosomal alignment, spindle asse…	5.0	ATP binding [GO:0005524]; histone H3S10 kinase activity [GO:0035175]; molecular function activator activity [GO:0140677]; protein heterodimerization activity [GO:0046982]; protein kinase activity [GO:0004672]; protein kinase binding [GO:0019901]; protein serine kinase activity [GO:0106310]; protein serine/threonine kinase activity [GO:0004674]; ubiquitin protein ligase binding [GO:0031625]	anterior/posterior axis specification [GO:0009948]; apoptotic process [GO:0006915]; cell division [GO:0051301]; centrosome cycle [GO:0007098]; centrosome localization [GO:0051642]; cilium disassembly [GO:0061523]; liver regeneration [GO:0097421]; meiotic cell cycle [GO:0051321]; meiotic spindle organization [GO:0000212]; microtubule cytoskeleton organization [GO:0000226]; mitotic cell cycle [GO:0…
[718]		O70126	3	3	13					39384.6	MOUSE	Aurora kinase B					O70126	O70126	reviewed	AURKB_MOUSE	Aurora kinase B (EC 2.7.11.1) (Aurora 1) (Aurora- and IPL1-like midbody-associated protein 1) (Aurora/IPL1-related kinase 2) (ARK-2) (Aurora-related kinase 2) (STK-1) (Serine/threonine-protein kinase 12) (Serine/threonine-protein kinase 5) (Serine/threonine-protein kinase aurora-B)	Aurkb Aik2 Aim1 Airk2 Ark2 Stk1 Stk12 Stk5	Mus musculus (Mouse)	345	FUNCTION: Serine/threonine-protein kinase component of the chromosomal passenger complex (CPC), a complex that acts as a key regulator of mitosis (By similarity). The CPC complex has essential functions at the centromere in ensuring correct chromosome alignment and segregation and is required for chromatin-induced microtubule stabilization and spindle assembly (By similarity). Involved in the bip…	5.0	ATP binding [GO:0005524]; histone H3S28 kinase activity [GO:0044022]; kinase binding [GO:0019900]; molecular function inhibitor activity [GO:0140678]; protein kinase activity [GO:0004672]; protein serine kinase activity [GO:0106310]; protein serine/threonine kinase activity [GO:0004674]	abscission [GO:0009838]; cell cycle G2/M phase transition [GO:0044839]; cellular response to UV [GO:0034644]; cleavage furrow formation [GO:0036089]; mitotic cell cycle [GO:0000278]; mitotic cytokinesis [GO:0000281]; mitotic cytokinesis checkpoint signaling [GO:0044878]; mitotic spindle midzone assembly [GO:0051256]; mitotic spindle organization [GO:0007052]; negative regulation of B cell apoptot…
[67]		O88738	31	33	10.1					532175	MOUSE	Baculoviral IAP repeat-containing protein 6					O88738	O88738	reviewed	BIRC6_MOUSE	Baculoviral IAP repeat-containing protein 6 (EC 2.3.2.27) (BIR repeat-containing ubiquitin-conjugating enzyme) (BRUCE) (RING-type E3 ubiquitin transferase BIRC6) (Ubiquitin-conjugating BIR domain enzyme apollon) (APOLLON)	Birc6 Kiaa1289	Mus musculus (Mouse)	4882	FUNCTION: Anti-apoptotic protein which can regulate cell death by controlling caspases and by acting as an E3 ubiquitin-protein ligase. Has an unusual ubiquitin conjugation system in that it could combine in a single polypeptide, ubiquitin conjugating (E2) with ubiquitin ligase (E3) activity, forming a chimeric E2/E3 ubiquitin ligase. Its targets include CASP9 and DIABLO/SMAC. Acts as an inhibito…	5.0	cysteine-type endopeptidase inhibitor activity [GO:0004869]; ubiquitin conjugating enzyme activity [GO:0061631]; ubiquitin-protein transferase activity [GO:0004842]	apoptotic process [GO:0006915]; cell cycle [GO:0007049]; cell division [GO:0051301]; cell population proliferation [GO:0008283]; labyrinthine layer development [GO:0060711]; negative regulation of apoptotic process [GO:0043066]; negative regulation of extrinsic apoptotic signaling pathway [GO:2001237]; negative regulation of peptidase activity [GO:0010466]; placenta development [GO:0001890]; posi…
[956]		Q9CQC6	3	4	9.3					48043.6	MOUSE	Basic leucine zipper and W2 domain-containing protein 1					Q9CQC6	Q9CQC6	reviewed	5MP2_MOUSE	eIF5-mimic protein 2 (Basic leucine zipper and W2 domain-containing protein 1)	Bzw1 5mp2	Mus musculus (Mouse)	419	FUNCTION: Translation initiation regulator which represses repeat-associated non-AUG (RAN) initiated translation probably by acting as a competitive inhibitor of eukaryotic translation initiation factor 5 (EIF5) function (By similarity). Enhances histone H4 gene transcription but does not seem to bind DNA directly (By similarity). {ECO:0000250|UniProtKB:Q7L1Q6}.	3.0		regulation of translational initiation [GO:0006446]
[956-1]	1	Q2L4X1	2	2	3.1	1	1	0.870398	2.1	48063.6	MUSMM	Basic leucine zipper and W2 domain-containing protein 2					Q2L4X1	Q2L4X1	reviewed	5MP1_MUSMM	eIF5-mimic protein 1 (Basic leucine zipper and W2 domain-containing protein 2) (Brain development-related molecule 2)	Bzw2 5mp1 Bdm2	Mus musculus molossinus (Japanese house mouse)	419	FUNCTION: Translation initiation regulator which represses non-AUG initiated translation and repeat-associated non-AUG (RAN) initiated translation by acting as a competitive inhibitor of eukaryotic translation initiation factor 5 (EIF5) function (By similarity). Increases the accuracy of translation initiation by impeding EIF5-dependent translation from non-AUG codons by competing with it for int…	2.0		regulation of translational initiation [GO:0006446]
[956-2]	1	Q91VK1	2	2	3.1	1	1	0.870398	2.1	48063.6	MOUSE	Basic leucine zipper and W2 domain-containing protein 2					Q91VK1	Q91VK1	reviewed	5MP1_MOUSE	eIF5-mimic protein 1 (Basic leucine zipper and W2 domain-containing protein 2)	Bzw2 5mp1	Mus musculus (Mouse)	419	FUNCTION: Translation initiation regulator which represses non-AUG initiated translation and repeat-associated non-AUG (RAN) initiated translation by acting as a competitive inhibitor of eukaryotic translation initiation factor 5 (EIF5) function (By similarity). Increases the accuracy of translation initiation by impeding EIF5-dependent translation from non-AUG codons by competing with it for int…	2.0		regulation of translational initiation [GO:0006446]
[674]		Q8K019				5	7	0	5.1	106003	MOUSE	Bcl-2-associated transcription factor 1					Q8K019	Q8K019	reviewed	BCLF1_MOUSE	Bcl-2-associated transcription factor 1 (Btf)	Bclaf1 Btf Kiaa0164	Mus musculus (Mouse)	919	FUNCTION: Death-promoting transcriptional repressor. May be involved in cyclin-D1/CCND1 mRNA stability through the SNARP complex which associates with both the 3'end of the CCND1 gene and its mRNA (By similarity). {ECO:0000250}.	5.0	DNA binding [GO:0003677]; transcription coregulator activity [GO:0003712]	cellular response to leukemia inhibitory factor [GO:1990830]; DNA damage response [GO:0006974]; negative regulation of DNA-templated transcription [GO:0045892]; positive regulation of apoptotic process [GO:0043065]; positive regulation of DNA-templated transcription initiation [GO:2000144]; positive regulation of intrinsic apoptotic signaling pathway [GO:2001244]; positive regulation of transcrip…
[844]		P59017	2	2	9.7					46719.8	MOUSE	Bcl-2-like protein 13					P59017	P59017	reviewed	B2L13_MOUSE	Bcl-2-like protein 13 (Bcl2-L-13) (Bcl-rambo) (Protein Mil1)	Bcl2l13 Mil1	Mus musculus (Mouse)	434	FUNCTION: May promote the activation of caspase-3 and apoptosis.	4.0		apoptotic process [GO:0006915]; regulation of apoptotic process [GO:0042981]
[1279]		Q61235	1	1	1.7					56382.2	MOUSE	Beta-2-syntrophin					Q61235	Q61235	reviewed	SNTB2_MOUSE	Beta-2-syntrophin (59 kDa dystrophin-associated protein A1 basic component 2) (Syntrophin-3) (SNT3) (Syntrophin-like) (SNTL)	Sntb2 Snt2b2	Mus musculus (Mouse)	520	FUNCTION: Adapter protein that binds to and probably organizes the subcellular localization of a variety of membrane proteins. May link various receptors to the actin cytoskeleton and the dystrophin glycoprotein complex. May play a role in the regulation of secretory granules via its interaction with PTPRN (By similarity). {ECO:0000250}.	5.0	actin binding [GO:0003779]; calmodulin binding [GO:0005516]; structural molecule activity [GO:0005198]
[14]		Q8CGC7	56	89	43.6	6	6	6.45545	4.8	170081	MOUSE	Bifunctional glutamate/proline--tRNA ligase					Q8CGC7	Q8CGC7	reviewed	SYEP_MOUSE	Bifunctional glutamate/proline--tRNA ligase (Bifunctional aminoacyl-tRNA synthetase) [Includes: Glutamate--tRNA ligase (EC 6.1.1.17) (Glutamyl-tRNA synthetase) (GluRS); Proline--tRNA ligase (EC 6.1.1.15) (Prolyl-tRNA synthetase) (ProRS)]	Eprs1 Eprs Qprs	Mus musculus (Mouse)	1512	FUNCTION: Multifunctional protein which is primarily part of the aminoacyl-tRNA synthetase multienzyme complex, also know as multisynthetase complex, that catalyzes the attachment of the cognate amino acid to the corresponding tRNA in a two-step reaction: the amino acid is first activated by ATP to form a covalent intermediate with AMP and is then transferred to the acceptor end of the cognate tR…	5.0	ATP binding [GO:0005524]; glutamate-tRNA ligase activity [GO:0004818]; GTPase binding [GO:0051020]; identical protein binding [GO:0042802]; proline-tRNA ligase activity [GO:0004827]; protein homodimerization activity [GO:0042803]; RNA stem-loop binding [GO:0035613]; zinc ion binding [GO:0008270]	cellular response to insulin stimulus [GO:0032869]; cellular response to type II interferon [GO:0071346]; glutamyl-tRNA aminoacylation [GO:0006424]; negative regulation of translation [GO:0017148]; prolyl-tRNA aminoacylation [GO:0006433]; regulation of long-chain fatty acid import into cell [GO:0140212]
[1356]		Q9JJF3	1	1	3					67557.3	MOUSE	Bifunctional lysine-specific demethylase and histidyl-hydroxylase NO66					Q9JJF3	Q9JJF3	reviewed	RIOX1_MOUSE	Ribosomal oxygenase 1 (Bifunctional lysine-specific demethylase and histidyl-hydroxylase NO66) (EC 1.14.11.27, EC 1.14.11.79)	Riox1 Mapjd No66 MNCb-7109	Mus musculus (Mouse)	603	FUNCTION: Oxygenase that can act as both a histone lysine demethylase and a ribosomal histidine hydroxylase (PubMed:19927124). Specifically demethylates 'Lys-4' (H3K4me) and 'Lys-36' (H3K36me) of histone H3, thereby playing a central role in histone code (PubMed:19927124). Preferentially demethylates trimethylated H3 'Lys-4' (H3K4me3) and monomethylated H3 'Lys-4' (H3K4me1) residues, while it has…	5.0	2-oxoglutarate-dependent dioxygenase activity [GO:0016706]; histone H3K36 demethylase activity [GO:0051864]; histone H3K36me/H3K36me2 demethylase activity [GO:0140680]; histone H3K4 demethylase activity [GO:0032453]; histone H3K4me/H3K4me2/H3K4me3 demethylase activity [GO:0034647]; iron ion binding [GO:0005506]; peptidyl-histidine dioxygenase activity [GO:0036139]; protein demethylase activity [G…	chromatin remodeling [GO:0006338]; negative regulation of DNA-templated transcription [GO:0045892]; negative regulation of osteoblast differentiation [GO:0045668]; protein demethylation [GO:0006482]; ribosome biogenesis [GO:0042254]
[527]		Q9EQQ9	5	5	6.8					103163	MOUSE	Bifunctional protein NCOAT					Q9EQQ9	Q9EQQ9	reviewed	OGA_MOUSE	Protein O-GlcNAcase (OGA) (EC 3.2.1.169) (Beta-N-acetylhexosaminidase) (Beta-hexosaminidase) (Bifunctional protein NCOAT) (Meningioma-expressed antigen 5) (N-acetyl-beta-D-glucosaminidase) (N-acetyl-beta-glucosaminidase)	Oga Hexc Kiaa0679 Mgea5	Mus musculus (Mouse)	916	FUNCTION: Cleaves GlcNAc but not GalNAc from O-glycosylated proteins. Can use p-nitrophenyl-beta-GlcNAc and 4-methylumbelliferone-GlcNAc as substrates but not p-nitrophenyl-beta-GalNAc or p-nitrophenyl-alpha-GlcNAc (in vitro) (PubMed:16517082). Does not bind acetyl-CoA and does not have histone acetyltransferase activity. {ECO:0000250|UniProtKB:O60502, ECO:0000269|PubMed:16517082}.	5.0	[protein]-3-O-(N-acetyl-D-glucosaminyl)-L-serine O-N-acetyl-alpha-D-glucosaminase activity [GO:0102167]; [protein]-3-O-(N-acetyl-D-glucosaminyl)-L-serine/L-threonine O-N-acetyl-alpha-D-glucosaminase activity [GO:0102571]; [protein]-3-O-(N-acetyl-D-glucosaminyl)-L-threonine O-N-acetyl-alpha-D-glucosaminase activity [GO:0102166]; beta-N-acetylglucosaminidase activity [GO:0016231]; histone acetyltra…	dATP metabolic process [GO:0046060]; glycoprotein metabolic process [GO:0009100]; N-acetylglucosamine metabolic process [GO:0006044]; necrotic cell death [GO:0070265]; negative regulation of cardiac muscle adaptation [GO:0010616]; negative regulation of protein glycosylation [GO:0060051]; positive regulation of calcium ion transport [GO:0051928]; positive regulation of calcium ion transport into …
[733]		Q8K3W0	3	3	11.5					43545.1	MOUSE	BRCA1-A complex subunit BRE					Q8K3W0	Q8K3W0	reviewed	BABA2_MOUSE	BRISC and BRCA1-A complex member 2 (BRCA1-A complex subunit BRE) (BRCA1/BRCA2-containing complex subunit 45) (Brain and reproductive organ-expressed protein)	Babam2 Bre	Mus musculus (Mouse)	383	FUNCTION: Component of the BRCA1-A complex, a complex that specifically recognizes 'Lys-63'-linked ubiquitinated histones H2A and H2AX at DNA lesions sites, leading to target the BRCA1-BARD1 heterodimer to sites of DNA damage at double-strand breaks (DSBs). The BRCA1-A complex also possesses deubiquitinase activity that specifically removes 'Lys-63'-linked ubiquitin on histones H2A and H2AX. In t…	5.0	polyubiquitin modification-dependent protein binding [GO:0031593]; tumor necrosis factor receptor binding [GO:0005164]	apoptotic process [GO:0006915]; cell division [GO:0051301]; cellular response to ionizing radiation [GO:0071479]; chromatin organization [GO:0006325]; DNA damage response [GO:0006974]; double-strand break repair [GO:0006302]; histone H2A K63-linked deubiquitination [GO:0070537]; histone H2A monoubiquitination [GO:0035518]; mitotic G2 DNA damage checkpoint signaling [GO:0007095]; mitotic G2/M tran…
[517]		Q8C3R1	5	6	9.9					89086.5	MOUSE	BRCA1-associated ATM activator 1					Q8C3R1	Q8C3R1	reviewed	BRAT1_MOUSE	BRCA1-associated ATM activator 1 (BRCA1-associated protein required for ATM activation protein 1)	Brat1 Baat1	Mus musculus (Mouse)	822	FUNCTION: Involved in DNA damage response; activates kinases ATM, SMC1A and PRKDC by modulating their phosphorylation status following ionizing radiation (IR) stress. Plays a role in regulating mitochondrial function and cell proliferation (By similarity). Required for protein stability of MTOR and MTOR-related proteins, and cell cycle progress by growth factors (PubMed:25657994). {ECO:0000250|Un…	5.0		apoptotic process [GO:0006915]; cell migration [GO:0016477]; cell population proliferation [GO:0008283]; DNA damage response [GO:0006974]; glucose metabolic process [GO:0006006]; mitochondrion localization [GO:0051646]; positive regulation of cell growth [GO:0030307]; positive regulation of protein phosphorylation [GO:0001934]; response to ionizing radiation [GO:0010212]
[1199]		A2A5R2	1	1	0.6					202242	MOUSE	Brefeldin A-inhibited guanine nucleotide-exchange protein 2					A2A5R2	A2A5R2	reviewed	BIG2_MOUSE	Brefeldin A-inhibited guanine nucleotide-exchange protein 2 (Brefeldin A-inhibited GEP 2) (ADP-ribosylation factor guanine nucleotide-exchange factor 2)	Arfgef2 Arfgep2 Big2	Mus musculus (Mouse)	1792	FUNCTION: Promotes guanine-nucleotide exchange on ARF1 and ARF3 and to a lower extent on ARF5 and ARF6. Promotes the activation of ARF1/ARF5/ARF6 through replacement of GDP with GTP. Involved in the regulation of Golgi vesicular transport. Required for the integrity of the endosomal compartment. Involved in trafficking from the trans-Golgi network (TGN) to endosomes and is required for membrane a…	5.0	GABA receptor binding [GO:0050811]; guanyl-nucleotide exchange factor activity [GO:0005085]; myosin binding [GO:0017022]; protein kinase A regulatory subunit binding [GO:0034237]	endomembrane system organization [GO:0010256]; endosome organization [GO:0007032]; exocytosis [GO:0006887]; Golgi to plasma membrane transport [GO:0006893]; intracellular signal transduction [GO:0035556]; positive regulation of tumor necrosis factor production [GO:0032760]; protein transport [GO:0015031]; receptor recycling [GO:0001881]; regulation of ARF protein signal transduction [GO:0032012]
[1388]		Q921C3	1	1	0.3					259230	MOUSE	Bromodomain and WD repeat-containing protein 1					Q921C3	Q921C3	reviewed	BRWD1_MOUSE	Bromodomain and WD repeat-containing protein 1 (WD repeat-containing protein 9)	Brwd1 Wdr9	Mus musculus (Mouse)	2304	FUNCTION: May be a transcriptional activator. May be involved in chromatin remodeling. Plays a role in the regulation of cell morphology and cytoskeletal organization. Required in the control of cell shape. {ECO:0000269|PubMed:12889071}.	5.0		cytoskeleton organization [GO:0007010]; regulation of cell shape [GO:0008360]; regulation of transcription by RNA polymerase II [GO:0006357]
[576]		Q8VC57	3	4	16.2					26163.9	MOUSE	BTB/POZ domain-containing protein KCTD5					Q8VC57	Q8VC57	reviewed	KCTD5_MOUSE	BTB/POZ domain-containing protein KCTD5	Kctd5	Mus musculus (Mouse)	234	FUNCTION: Its interaction with CUL3 suggests that it may act as a substrate adapter in some E3 ligase complex (By similarity). Does not affect the function of Kv channel Kv2.1/KCNB1, Kv1.2/KCNA2, Kv4.2/KCND2 and Kv3.4/KCNC4 (By similarity). {ECO:0000250|UniProtKB:Q9NXV2}.	3.0	cullin family protein binding [GO:0097602]; identical protein binding [GO:0042802]; protein-containing complex binding [GO:0044877]	proteasome-mediated ubiquitin-dependent protein catabolic process [GO:0043161]; protein homooligomerization [GO:0051260]
[1330]		Q9JMD0				1	1	0	2.6	52793.4	MOUSE	BUB3-interacting and GLEBS motif-containing protein ZNF207					Q9JMD0	Q9JMD0	reviewed	ZN207_MOUSE	BUB3-interacting and GLEBS motif-containing protein ZNF207 (BuGZ) (49 kDa zinc finger protein) (Zinc finger protein 207)	Znf207 Bugz Zep Zfp207	Mus musculus (Mouse)	495	FUNCTION: Kinetochore- and microtubule-binding protein that plays a key role in spindle assembly. ZNF207/BuGZ is mainly composed of disordered low-complexity regions and undergoes phase transition or coacervation to form temperature-dependent liquid droplets. Coacervation promotes microtubule bundling and concentrates tubulin, promoting microtubule polymerization and assembly of spindle and spind…	5.0	heparin binding [GO:0008201]; metal ion binding [GO:0046872]; microtubule binding [GO:0008017]	attachment of spindle microtubules to kinetochore [GO:0008608]; cell division [GO:0051301]; microtubule bundle formation [GO:0001578]; microtubule polymerization [GO:0046785]; mitotic sister chromatid segregation [GO:0000070]; mitotic spindle assembly [GO:0090307]; mitotic spindle assembly checkpoint signaling [GO:0007094]; protein stabilization [GO:0050821]; regulation of chromosome segregation …
[907]		O54825	3	3	7.6					49784	MOUSE	Bystin					O54825	O54825	reviewed	BYST_MOUSE	Bystin	Bysl	Mus musculus (Mouse)	436	FUNCTION: Required for processing of 20S pre-rRNA precursor and biogenesis of 40S ribosomal subunits. {ECO:0000269|PubMed:17055491, ECO:0000269|PubMed:17242206}.	5.0	snoRNA binding [GO:0030515]	blastocyst formation [GO:0001825]; in utero embryonic development [GO:0001701]; maturation of SSU-rRNA from tricistronic rRNA transcript (SSU-rRNA, 5.8S rRNA, LSU-rRNA) [GO:0000462]; rRNA processing [GO:0006364]; stem cell proliferation [GO:0072089]; trophectodermal cell differentiation [GO:0001829]
[714]		Q922D8				4	4	0	4.7	101200	MOUSE	C-1-tetrahydrofolate synthase, cytoplasmic					Q922D8	Q922D8	reviewed	C1TC_MOUSE	C-1-tetrahydrofolate synthase, cytoplasmic (C1-THF synthase) [Cleaved into: C-1-tetrahydrofolate synthase, cytoplasmic, N-terminally processed] [Includes: Methylenetetrahydrofolate dehydrogenase (EC 1.5.1.5); Methenyltetrahydrofolate cyclohydrolase (EC 3.5.4.9); Formyltetrahydrofolate synthetase (EC 6.3.4.3)]	Mthfd1	Mus musculus (Mouse)	935	FUNCTION: Trifunctional enzyme that catalyzes the interconversion of three forms of one-carbon-substituted tetrahydrofolate: (6R)-5,10-methylene-5,6,7,8-tetrahydrofolate, 5,10-methenyltetrahydrofolate and (6S)-10-formyltetrahydrofolate. These derivatives of tetrahydrofolate are differentially required in nucleotide and amino acid biosynthesis, (6S)-10-formyltetrahydrofolate being required for pur…	5.0	ATP binding [GO:0005524]; formate-tetrahydrofolate ligase activity [GO:0004329]; methenyltetrahydrofolate cyclohydrolase activity [GO:0004477]; methylenetetrahydrofolate dehydrogenase (NAD+) activity [GO:0004487]; methylenetetrahydrofolate dehydrogenase (NADP+) activity [GO:0004488]; methylenetetrahydrofolate dehydrogenase [NAD(P)+] activity [GO:0004486]	10-formyltetrahydrofolate biosynthetic process [GO:0009257]; heart development [GO:0007507]; histidine biosynthetic process [GO:0000105]; methionine biosynthetic process [GO:0009086]; methionine metabolic process [GO:0006555]; neural tube closure [GO:0001843]; neutrophil homeostasis [GO:0001780]; one-carbon metabolic process [GO:0006730]; purine nucleotide biosynthetic process [GO:0006164]; purin…
[2]		B2RQC6	102	257	56.5	15	15	7.45641	8.3	243241	MOUSE	CAD protein					B2RQC6	B2RQC6	reviewed	PYR1_MOUSE	CAD protein [Includes: Glutamine-dependent carbamoyl-phosphate synthase (EC 6.3.5.5); Aspartate carbamoyltransferase (EC 2.1.3.2); Dihydroorotase (EC 3.5.2.3)]	Cad	Mus musculus (Mouse)	2225	FUNCTION: This protein is a 'fusion' protein encoding four enzymatic activities of the pyrimidine pathway (GATase, CPSase, ATCase and DHOase). {ECO:0000250|UniProtKB:P27708}.	5.0	amino acid binding [GO:0016597]; aspartate carbamoyltransferase activity [GO:0004070]; ATP binding [GO:0005524]; carbamoyl-phosphate synthase (glutamine-hydrolyzing) activity [GO:0004088]; dihydroorotase activity [GO:0004151]; enzyme binding [GO:0019899]; identical protein binding [GO:0042802]; protein kinase activity [GO:0004672]; small molecule binding [GO:0036094]; UTP binding [GO:0002134]; zi…	'de novo' pyrimidine nucleobase biosynthetic process [GO:0006207]; 'de novo' UMP biosynthetic process [GO:0044205]; citrulline biosynthetic process [GO:0019240]; glutamine metabolic process [GO:0006541]; peptidyl-threonine phosphorylation [GO:0018107]; protein autophosphorylation [GO:0046777]; response to insulin [GO:0032868]; response to starvation [GO:0042594]; UDP biosynthetic process [GO:0006…
[1278]		Q8CGZ0				3	4	0	2.5	106170	MOUSE	Calcium homeostasis endoplasmic reticulum protein					Q8CGZ0	Q8CGZ0	reviewed	CHERP_MOUSE	Calcium homeostasis endoplasmic reticulum protein (SR-related CTD-associated factor 6)	Cherp Scaf6	Mus musculus (Mouse)	936	FUNCTION: Involved in calcium homeostasis, growth and proliferation. {ECO:0000250|UniProtKB:Q8IWX8}.	4.0	RNA binding [GO:0003723]; transmembrane transporter binding [GO:0044325]	intracellular calcium ion homeostasis [GO:0006874]; negative regulation of cell population proliferation [GO:0008285]; positive regulation of calcineurin-NFAT signaling cascade [GO:0070886]; release of sequestered calcium ion into cytosol [GO:0051209]; RNA processing [GO:0006396]
[679]		Q9QXX4	3	4	8.1					74467.6	MOUSE	Calcium-binding mitochondrial carrier protein Aralar2					Q9QXX4	Q9QXX4	reviewed	S2513_MOUSE	Electrogenic aspartate/glutamate antiporter SLC25A13, mitochondrial (Citrin) (Solute carrier family 25 member 13)	Slc25a13	Mus musculus (Mouse)	676	FUNCTION: Mitochondrial electrogenic aspartate/glutamate antiporter that favors efflux of aspartate and entry of glutamate and proton within the mitochondria as part of the malate-aspartate shuttle (By similarity). Also mediates the uptake of L-cysteinesulfinate by mitochondria in exchange of L-glutamate and proton. Can also exchange L-cysteinesulfinate with aspartate in their anionic form withou…	5.0	3-sulfino-L-alanine: proton, glutamate antiporter activity [GO:0000514]; acidic amino acid transmembrane transporter activity [GO:0015172]; aspartate:glutamate, proton antiporter activity [GO:0000515]; calcium ion binding [GO:0005509]; identical protein binding [GO:0042802]; L-aspartate transmembrane transporter activity [GO:0015183]; L-glutamate transmembrane transporter activity [GO:0005313]	aspartate transmembrane transport [GO:0015810]; ATP biosynthetic process [GO:0006754]; cellular respiration [GO:0045333]; gluconeogenesis [GO:0006094]; L-glutamate transmembrane transport [GO:0015813]; malate-aspartate shuttle [GO:0043490]; response to calcium ion [GO:0051592]
[1387]		Q91ZM8	1	1	5.6					24453.3	MOUSE	Calcium-binding protein 7					Q91ZM8	Q91ZM8	reviewed	CABP7_MOUSE	Calcium-binding protein 7 (CaBP7) (Calneuron II) (Calneuron-2)	Cabp7 Caln2	Mus musculus (Mouse)	215	FUNCTION: Negatively regulates Golgi-to-plasma membrane trafficking by interacting with PI4KB and inhibiting its activity. {ECO:0000250}.	3.0	calcium ion binding [GO:0005509]
[641]		Q9CXW3	4	6	28.8					26510.4	MOUSE	Calcyclin-binding protein					Q9CXW3	Q9CXW3	reviewed	CYBP_MOUSE	Calcyclin-binding protein (CacyBP) (Siah-interacting protein)	Cacybp Sip	Mus musculus (Mouse)	229	FUNCTION: May be involved in calcium-dependent ubiquitination and subsequent proteasomal degradation of target proteins. Probably serves as a molecular bridge in ubiquitin E3 complexes. Participates in the ubiquitin-mediated degradation of beta-catenin (CTNNB1) (By similarity). {ECO:0000250}.	5.0	molecular adaptor activity [GO:0060090]; protein domain specific binding [GO:0019904]; protein homodimerization activity [GO:0042803]; S100 protein binding [GO:0044548]; tubulin binding [GO:0015631]; ubiquitin protein ligase binding [GO:0031625]	cardiac muscle cell differentiation [GO:0055007]; cellular response to leukemia inhibitory factor [GO:1990830]; heart development [GO:0007507]; negative regulation of cell death [GO:0060548]; positive regulation of DNA replication [GO:0045740]; response to growth hormone [GO:0060416]
[615]		P35564	4	8	8.1	1	1	3.48159	2.7	67278.5	MOUSE	Calnexin					P35564	P35564	reviewed	CALX_MOUSE	Calnexin	Canx	Mus musculus (Mouse)	591	FUNCTION: Calcium-binding protein that interacts with newly synthesized monoglucosylated glycoproteins in the endoplasmic reticulum. It may act in assisting protein assembly and/or in the retention within the ER of unassembled protein subunits. It seems to play a major role in the quality control apparatus of the ER by the retention of incorrectly folded proteins. Associated with partial T-cell a…	5.0	apolipoprotein binding [GO:0034185]; calcium ion binding [GO:0005509]; carbohydrate binding [GO:0030246]; ionotropic glutamate receptor binding [GO:0035255]; unfolded protein binding [GO:0051082]	aging [GO:0007568]; clathrin-dependent endocytosis [GO:0072583]; protein folding [GO:0006457]; synaptic vesicle endocytosis [GO:0048488]; ubiquitin-dependent ERAD pathway [GO:0030433]
[447]		Q9DAW9	6	7	24.5					36429	MOUSE	Calponin-3					Q9DAW9	Q9DAW9	reviewed	CNN3_MOUSE	Calponin-3 (Calponin, acidic isoform)	Cnn3	Mus musculus (Mouse)	330	FUNCTION: Thin filament-associated protein that is implicated in the regulation and modulation of smooth muscle contraction. It is capable of binding to actin, calmodulin and tropomyosin. The interaction of calponin with actin inhibits the actomyosin Mg-ATPase activity (By similarity). {ECO:0000250}.	4.0	actin filament binding [GO:0051015]; calmodulin binding [GO:0005516]; microtubule binding [GO:0008017]	actin filament organization [GO:0007015]; actomyosin structure organization [GO:0031032]; epithelial cell differentiation [GO:0030855]; negative regulation of ATP-dependent activity [GO:0032780]
[1066]		P68181	1	1	3.4					40708.2	MOUSE	cAMP-dependent protein kinase catalytic subunit beta					P68181	P68181	reviewed	KAPCB_MOUSE	cAMP-dependent protein kinase catalytic subunit beta (PKA C-beta) (EC 2.7.11.11)	Prkacb Pkacb	Mus musculus (Mouse)	351	FUNCTION: Mediates cAMP-dependent signaling triggered by receptor binding to GPCRs. PKA activation regulates diverse cellular processes such as cell proliferation, the cell cycle, differentiation and regulation of microtubule dynamics, chromatin condensation and decondensation, nuclear envelope disassembly and reassembly, as well as regulation of intracellular transport mechanisms and ion flux (P…	5.0	AMP-activated protein kinase activity [GO:0004679]; ATP binding [GO:0005524]; cAMP-dependent protein kinase activity [GO:0004691]; magnesium ion binding [GO:0000287]; protein serine kinase activity [GO:0106310]; protein serine/threonine kinase activity [GO:0004674]; ubiquitin protein ligase binding [GO:0031625]	adenylate cyclase-modulating G protein-coupled receptor signaling pathway [GO:0007188]; negative regulation of meiotic cell cycle [GO:0051447]; negative regulation of smoothened signaling pathway involved in dorsal/ventral neural tube patterning [GO:1901621]; neural tube closure [GO:0001843]; peptidyl-serine phosphorylation [GO:0018105]; protein kinase A signaling [GO:0010737]; protein phosphoryl…
[1360]		Q9DBC7	1	1	2.1					43185.5	MOUSE	cAMP-dependent protein kinase type I-alpha regulatory subunit					Q9DBC7	Q9DBC7	reviewed	KAP0_MOUSE	cAMP-dependent protein kinase type I-alpha regulatory subunit [Cleaved into: cAMP-dependent protein kinase type I-alpha regulatory subunit, N-terminally processed]	Prkar1a	Mus musculus (Mouse)	381	FUNCTION: Regulatory subunit of the cAMP-dependent protein kinases involved in cAMP signaling in cells. {ECO:0000250}.	5.0	cAMP binding [GO:0030552]; cAMP-dependent protein kinase inhibitor activity [GO:0004862]; cAMP-dependent protein kinase regulator activity [GO:0008603]; protein domain specific binding [GO:0019904]; protein kinase A catalytic subunit binding [GO:0034236]; ubiquitin protein ligase binding [GO:0031625]	adenylate cyclase-activating G protein-coupled receptor signaling pathway [GO:0007189]; animal organ morphogenesis [GO:0009887]; cardiac muscle cell proliferation [GO:0060038]; cellular response to glucagon stimulus [GO:0071377]; heart development [GO:0007507]; mesenchymal cell proliferation [GO:0010463]; mesoderm formation [GO:0001707]; negative regulation of activated T cell proliferation [GO:0…
[201]		Q60865	9	11	20.1	16	36	0.132977	19.5	78169.5	MOUSE	Caprin-1					Q60865	Q60865	reviewed	CAPR1_MOUSE	Caprin-1 (Cytoplasmic activation- and proliferation-associated protein 1) (GPI-anchored membrane protein 1) (GPI-anchored protein p137) (GPI-p137) (p137GPI) (Membrane component chromosome 11 surface marker 1) (RNA granule protein 105)	Caprin1 Gpiap Gpiap1 Gpip137 M11s1 Rng105 G5E5	Mus musculus (Mouse)	707	FUNCTION: mRNA-binding protein that acts as a regulator of mRNAs transport, translation and/or stability, and which is involved in synaptic plasticity in neurons and cell proliferation and migration in multiple cell types (PubMed:20516077). Acts as an mRNA regulator by mediating formation of some phase-separated membraneless compartment: undergoes liquid-liquid phase separation upon binding to ta…	5.0	ATP binding [GO:0005524]; molecular condensate scaffold activity [GO:0140693]; molecular function activator activity [GO:0140677]; mRNA binding [GO:0003729]; RNA binding [GO:0003723]; signaling adaptor activity [GO:0035591]; translation regulator activity [GO:0045182]	cell differentiation [GO:0030154]; negative regulation of translation [GO:0017148]; non-membrane-bounded organelle assembly [GO:0140694]; positive regulation of dendrite morphogenesis [GO:0050775]; positive regulation of dendritic spine morphogenesis [GO:0061003]; positive regulation of stress granule assembly [GO:0062029]; regulation of deadenylation-dependent decapping of nuclear-transcribed mR…
[1379]		P97742	1	1	1.8					88252.3	MOUSE	Carnitine O-palmitoyltransferase 1, liver isoform					P97742	P97742	reviewed	CPT1A_MOUSE	Carnitine O-palmitoyltransferase 1, liver isoform (CPT1-L) (EC 2.3.1.21) (Carnitine O-palmitoyltransferase I, liver isoform) (CPT I) (CPTI-L) (Carnitine palmitoyltransferase 1A)	Cpt1a Cpt-1 Cpt1	Mus musculus (Mouse)	773	FUNCTION: Catalyzes the transfer of the acyl group of long-chain fatty acid-CoA conjugates onto carnitine, an essential step for the mitochondrial uptake of long-chain fatty acids and their subsequent beta-oxidation in the mitochondrion (PubMed:16169268, PubMed:17030509). Plays an important role in hepatic triglyceride metabolism (By similarity). {ECO:0000250|UniProtKB:P32198, ECO:0000269|PubMed:…	5.0	carnitine O-palmitoyltransferase activity [GO:0004095]; identical protein binding [GO:0042802]; palmitoleoyltransferase activity [GO:1990698]	carnitine metabolic process [GO:0009437]; cellular response to fatty acid [GO:0071398]; eating behavior [GO:0042755]; epithelial cell differentiation [GO:0030855]; fatty acid beta-oxidation [GO:0006635]; fatty acid metabolic process [GO:0006631]; glucose metabolic process [GO:0006006]; lipid localization [GO:0010876]; liver regeneration [GO:0097421]; long-chain fatty acid metabolic process [GO:00…
[656]		Q9CYD3	5	5	13.5					46169.7	MOUSE	Cartilage-associated protein					Q9CYD3	Q9CYD3	reviewed	CRTAP_MOUSE	Cartilage-associated protein	Crtap Casp	Mus musculus (Mouse)	400	FUNCTION: Necessary for efficient 3-hydroxylation of fibrillar collagen prolyl residues. {ECO:0000269|PubMed:17055431}.	4.0		chaperone-mediated protein folding [GO:0061077]; collagen fibril organization [GO:0030199]; negative regulation of post-translational protein modification [GO:1901874]; peptidyl-proline hydroxylation to 3-hydroxy-L-proline [GO:0018400]; protein stabilization [GO:0050821]; spermatogenesis [GO:0007283]
[399]		Q8BK63	7	8	26.1					38915.2	MOUSE	Casein kinase I isoform alpha					Q8BK63	Q8BK63	reviewed	KC1A_MOUSE	Casein kinase I isoform alpha (CKI-alpha) (EC 2.7.11.1) (CK1)	Csnk1a1	Mus musculus (Mouse)	337	FUNCTION: Casein kinases are operationally defined by their preferential utilization of acidic proteins such as caseins as substrates (By similarity). Can phosphorylate a large number of proteins (By similarity). Participates in Wnt signaling (By similarity). Phosphorylates CTNNB1 at 'Ser-45' (By similarity). May phosphorylate PER1 and PER2 (PubMed:21930935). May play a role in segregating chromo…	5.0	ATP binding [GO:0005524]; magnesium ion binding [GO:0000287]; peptide binding [GO:0042277]; phosphoprotein binding [GO:0051219]; protein kinase activity [GO:0004672]; protein serine kinase activity [GO:0106310]; protein serine/threonine kinase activity [GO:0004674]	cell cycle [GO:0007049]; cell division [GO:0051301]; cell morphogenesis [GO:0000902]; Golgi organization [GO:0007030]; intermediate filament cytoskeleton organization [GO:0045104]; negative regulation of canonical Wnt signaling pathway [GO:0090090]; negative regulation of NLRP3 inflammasome complex assembly [GO:1900226]; peptidyl-serine phosphorylation [GO:0018105]; positive regulation of proteas…
[truncated: 1,223 more rows]

## Sheet: Nature 2016 epichap components
Epichaperome components in Type 1 tumors as per Rodina et al. Nature 2016 and in ES14 as per this study
																																CDC37	yes
			PU CP 1/results1			GA CP 1/results1																										DNJA2	yes
Rank	Uniq Pep	Acc #	Num Unique	Peptide Count	% Cov	Num Unique	Peptide Count	PU/(GA*2.2978)	% Cov		Protein Name							Entry Name	Protein names	Gene Names	PU	GM	log2 PU	log2 GM								AIP	yes
[3]		P07901	73	540	76.1	63	235	1.00003	57.4		Heat shock protein HSP 90-alpha							HS90A_MOUSE	Heat shock protein HSP 90-alpha (EC 3.6.4.10) (Heat shock 86 kDa) (HSP 86) (HSP86) (Tumor-specific transplantation 86 kDa antigen) (TSTA)	Hsp90aa1 Hsp86 Hsp86-1 Hspca	540	235	9.07682	7.87652								FKBP4	yes
[3-1]	55	P11499	71	708	80.2	60	218	1.4134	56.1		Heat shock protein HSP 90-beta							HS90B_MOUSE	Heat shock protein HSP 90-beta (Heat shock 84 kDa) (HSP 84) (HSP84) (Tumor-specific transplantation 84 kDa antigen) (TSTA)	Hsp90ab1 Hsp84 Hsp84-1 Hspcb	708	218	9.46761	7.76818								DNJA1	yes
																																SGT1	yes
[truncated: 38 more rows]

## Sheet: native-PAGE result
Search Name:	MajorBand2_Native_300kD_O23021005
[truncated: 289 more rows]

[truncated: 1 more sheets: MS Sample Log]
